# Supplementary material
Source: publisher figshare collection journal article supplement (https://acs.figshare.com/ndownloader/files/9553684)
Supplement: Supplementary file 1 [file 9553684]

 
data_2a
 
_audit_creation_method            'SHELXL-2014/7'
_shelx_SHELXL_version_number      '2014/7'
_chemical_name_systematic         ?
_chemical_name_common             ?
_chemical_melting_point           ?
_chemical_formula_moiety          ?
_chemical_formula_sum
 'C17 H17 Br N2 S' 
_chemical_formula_weight          361.29

loop_
 _atom_type_symbol
 _atom_type_description
 _atom_type_scat_dispersion_real
 _atom_type_scat_dispersion_imag
 _atom_type_scat_source
 'C'  'C'   0.0033   0.0016
 'International Tables Vol C Tables 4.2.6.8 and 6.1.1.4'
 'N'  'N'   0.0061   0.0033
 'International Tables Vol C Tables 4.2.6.8 and 6.1.1.4'
 'H'  'H'   0.0000   0.0000
 'International Tables Vol C Tables 4.2.6.8 and 6.1.1.4'
 'S'  'S'   0.1246   0.1234
 'International Tables Vol C Tables 4.2.6.8 and 6.1.1.4'
 'Br'  'Br'  -0.2901   2.4595
 'International Tables Vol C Tables 4.2.6.8 and 6.1.1.4'
 
_space_group_crystal_system       monoclinic
_space_group_IT_number            15
_space_group_name_H-M_alt         'C 2/c'
_space_group_name_Hall            '-C 2yc'
 
_shelx_space_group_comment
;
The symmetry employed for this shelxl refinement is uniquely defined
by the following loop, which should always be used as a source of
symmetry information in preference to the above space-group names.
They are only intended as comments.
;
 
loop_
 _space_group_symop_operation_xyz
 'x, y, z'
 '-x, y, -z+1/2'
 'x+1/2, y+1/2, z'
 '-x+1/2, y+1/2, -z+1/2'
 '-x, -y, -z'
 'x, -y, z-1/2'
 '-x+1/2, -y+1/2, -z'
 'x+1/2, -y+1/2, z-1/2'
 
_cell_length_a                    18.6401(12)
_cell_length_b                    14.9843(10)
_cell_length_c                    12.6094(9)
_cell_angle_alpha                 90
_cell_angle_beta                  112.356(3)
_cell_angle_gamma                 90
_cell_volume                      3257.2(4)
_cell_formula_units_Z             8
_cell_measurement_temperature     296(2)
_cell_measurement_reflns_used     25
_cell_measurement_theta_min       1.746
_cell_measurement_theta_max       28.326
 
_exptl_crystal_description        needle
_exptl_crystal_colour             yellow
_exptl_crystal_density_meas       'not measured'
_exptl_crystal_density_method     'not measured'
_exptl_crystal_density_diffrn     1.474          
_exptl_crystal_F_000              1472
_exptl_transmission_factor_min    ?
_exptl_transmission_factor_max    ?
_exptl_crystal_size_max           0.18
_exptl_crystal_size_mid           0.11
_exptl_crystal_size_min           0.09
_exptl_absorpt_coefficient_mu     2.647
_shelx_estimated_absorpt_T_min    ?
_shelx_estimated_absorpt_T_max    ?
_exptl_absorpt_correction_type    multi-scan
_exptl_absorpt_correction_T_min   0.6491
_exptl_absorpt_correction_T_max   0.7457
_exptl_absorpt_process_details    'SADABS V2014/4 (Bruker AXS Inc.)'
_exptl_absorpt_special_details    ?
_diffrn_ambient_temperature       296(2)
_diffrn_radiation_wavelength      0.71073
_diffrn_radiation_type            MoK\a
_diffrn_source                    ?
_diffrn_measurement_device_type   'Bruker APEX-II CCD'
_diffrn_measurement_method        '\f and \w scans'
_diffrn_detector_area_resol_mean  ?
_diffrn_reflns_number             24989
_diffrn_reflns_av_unetI/netI      0.0581
_diffrn_reflns_av_R_equivalents   0.0546
_diffrn_reflns_limit_h_min        -24
_diffrn_reflns_limit_h_max        21
_diffrn_reflns_limit_k_min        -19
_diffrn_reflns_limit_k_max        19
_diffrn_reflns_limit_l_min        -16
_diffrn_reflns_limit_l_max        16
_diffrn_reflns_theta_min          1.801
_diffrn_reflns_theta_max          28.326
_diffrn_reflns_theta_full         25.242
_diffrn_measured_fraction_theta_max   0.999
_diffrn_measured_fraction_theta_full  1.000
_diffrn_reflns_Laue_measured_fraction_max    0.999
_diffrn_reflns_Laue_measured_fraction_full   1.000
_diffrn_reflns_point_group_measured_fraction_max   0.999
_diffrn_reflns_point_group_measured_fraction_full  1.000
_reflns_number_total              4057
_reflns_number_gt                 2053
_reflns_threshold_expression      'I > 2\s(I)'
_reflns_Friedel_coverage          0.000
_reflns_Friedel_fraction_max      .
_reflns_Friedel_fraction_full     .
 
_reflns_special_details
;
 Reflections were merged by SHELXL according to the crystal
 class for the calculation of statistics and refinement.
 
 _reflns_Friedel_fraction is defined as the number of unique
 Friedel pairs measured divided by the number that would be
 possible theoretically, ignoring centric projections and
 systematic absences.
;
 
_computing_data_collection        'APEX2 (Bruker AXS, 2010)'
_computing_cell_refinement        'SAINT V8.34A (Bruker AXS Inc., 2013)'
_computing_data_reduction         'SAINT V8.34A (Bruker AXS Inc., 2013)'
_computing_structure_solution     'SHELXS'
_computing_structure_refinement 'SHELXL-2014/7 (Sheldrick, 2014)'
_computing_molecular_graphics     'Ortep for Windows (Farrugia, 2012)'
_computing_publication_material   'WinGX publication routines (Farrugia, 2012)'
_refine_special_details           ?
_refine_ls_structure_factor_coef  Fsqd
_refine_ls_matrix_type            full
_refine_ls_weighting_scheme       calc
_refine_ls_weighting_details
'w=1/[\s^2^(Fo^2^)+(0.0739P)^2^] where P=(Fo^2^+2Fc^2^)/3'
_atom_sites_solution_primary      ?
_atom_sites_solution_secondary    ?
_atom_sites_solution_hydrogens    geom
_refine_ls_hydrogen_treatment     refU
_refine_ls_extinction_method      none
_refine_ls_extinction_coef        .
_refine_ls_number_reflns          4057
_refine_ls_number_parameters      201
_refine_ls_number_restraints      0
_refine_ls_R_factor_all           0.1207
_refine_ls_R_factor_gt            0.0434
_refine_ls_wR_factor_ref          0.1435
_refine_ls_wR_factor_gt           0.1067
_refine_ls_goodness_of_fit_ref    0.987
_refine_ls_restrained_S_all       0.987
_refine_ls_shift/su_max           0.000
_refine_ls_shift/su_mean          0.000
 
loop_
 _atom_site_label
 _atom_site_type_symbol
 _atom_site_fract_x
 _atom_site_fract_y
 _atom_site_fract_z
 _atom_site_U_iso_or_equiv
 _atom_site_adp_type
 _atom_site_occupancy
 _atom_site_site_symmetry_order  
 _atom_site_calc_flag
 _atom_site_refinement_flags_posn
 _atom_site_refinement_flags_adp
 _atom_site_refinement_flags_occupancy
 _atom_site_disorder_assembly
 _atom_site_disorder_group
Br1 Br 0.12445(3) 0.05642(3) 0.82274(4) 0.0772(2) Uani 1 1 d . . . . .
S1 S 0.01714(6) -0.13853(6) 0.50530(7) 0.0587(3) Uani 1 1 d . . . . .
N1 N 0.04841(17) -0.06329(17) 0.6035(2) 0.0550(8) Uani 1 1 d . . . . .
N2 N 0.04155(14) -0.22870(18) 0.5806(2) 0.0485(7) Uani 1 1 d . . . . .
C1 C 0.11591(18) -0.0686(2) 0.8134(3) 0.0469(8) Uani 1 1 d . . . . .
C2 C 0.14484(17) -0.1224(2) 0.9079(3) 0.0471(8) Uani 1 1 d . . . . .
C3 C 0.13963(17) -0.2162(2) 0.8923(3) 0.0451(8) Uani 1 1 d . . . . .
H3 H 0.1590(8) -0.2508(13) 0.957(2) 0.061(5) Uiso 1 1 calc R U . . .
C4 C 0.10791(16) -0.2602(2) 0.7885(3) 0.0405(7) Uani 1 1 d . . . . .
C5 C 0.07664(17) -0.2028(2) 0.6908(3) 0.0417(7) Uani 1 1 d . . . . .
C6 C 0.08018(17) -0.1072(2) 0.7031(3) 0.0448(8) Uani 1 1 d . . . . .
C7 C 0.11026(16) -0.3583(2) 0.7807(3) 0.0398(7) Uani 1 1 d . . . . .
C8 C 0.09537(18) -0.4117(2) 0.8596(3) 0.0463(8) Uani 1 1 d . . . . .
H8 H 0.0754(7) -0.3833(10) 0.917(2) 0.061(5) Uiso 1 1 calc R U . . .
C9 C 0.10720(18) -0.5031(2) 0.8620(3) 0.0483(8) Uani 1 1 d . . . . .
H9 H 0.0946(5) -0.5407(14) 0.920(2) 0.061(5) Uiso 1 1 calc R U . . .
C10 C 0.13607(18) -0.5449(2) 0.7872(3) 0.0439(8) Uani 1 1 d . . . . .
C11 C 0.1481(2) -0.4901(2) 0.7073(3) 0.0548(9) Uani 1 1 d . . . . .
H11 H 0.1656(7) -0.5153(10) 0.654(2) 0.061(5) Uiso 1 1 calc R U . . .
C12 C 0.1351(2) -0.3990(2) 0.7036(3) 0.0555(9) Uani 1 1 d . . . . .
H12 H 0.1432(4) -0.3655(13) 0.649(2) 0.061(5) Uiso 1 1 calc R U . . .
C13 C 0.1836(2) -0.0857(3) 1.0277(3) 0.0648(10) Uani 1 1 d . . . . .
H13A H 0.2260 -0.0478 1.0312 0.146(6) Uiso 1 1 calc R U . . .
H13B H 0.2028 -0.1341 1.0809 0.146(6) Uiso 1 1 calc R U . . .
H13C H 0.1467 -0.0517 1.0473 0.146(6) Uiso 1 1 calc R U . . .
C14 C 0.15463(19) -0.6441(2) 0.7934(3) 0.0499(8) Uani 1 1 d . . . . .
C15 C 0.1474(3) -0.6897(3) 0.8980(4) 0.0947(15) Uani 1 1 d . . . . .
H15A H 0.1767 -0.6568 0.9661 0.146(6) Uiso 1 1 calc R U . . .
H15B H 0.1672 -0.7495 0.9045 0.146(6) Uiso 1 1 calc R U . . .
H15C H 0.0939 -0.6914 0.8888 0.146(6) Uiso 1 1 calc R U . . .
C16 C 0.2377(3) -0.6571(3) 0.8051(6) 0.1108(19) Uani 1 1 d . . . . .
H16A H 0.2438 -0.6357 0.7373 0.146(6) Uiso 1 1 calc R U . . .
H16B H 0.2505 -0.7194 0.8151 0.146(6) Uiso 1 1 calc R U . . .
H16C H 0.2716 -0.6245 0.8705 0.146(6) Uiso 1 1 calc R U . . .
C17 C 0.1011(3) -0.6898(3) 0.6856(4) 0.1146(19) Uani 1 1 d . . . . .
H17A H 0.0496 -0.6919 0.6855 0.146(6) Uiso 1 1 calc R U . . .
H17B H 0.1192 -0.7494 0.6829 0.146(6) Uiso 1 1 calc R U . . .
H17C H 0.1005 -0.6571 0.6197 0.146(6) Uiso 1 1 calc R U . . .
 
loop_
 _atom_site_aniso_label
 _atom_site_aniso_U_11
 _atom_site_aniso_U_22
 _atom_site_aniso_U_33
 _atom_site_aniso_U_23
 _atom_site_aniso_U_13
 _atom_site_aniso_U_12
Br1 0.1106(4) 0.0435(3) 0.0767(3) -0.00794(19) 0.0346(3) 0.0000(2)
S1 0.0720(6) 0.0604(6) 0.0392(5) 0.0057(4) 0.0161(4) 0.0025(5)
N1 0.0646(18) 0.0499(18) 0.0503(18) 0.0061(14) 0.0215(15) 0.0053(14)
N2 0.0527(17) 0.0535(17) 0.0368(15) -0.0026(13) 0.0140(13) -0.0025(13)
C1 0.055(2) 0.0384(19) 0.049(2) -0.0034(15) 0.0216(17) 0.0014(15)
C2 0.0420(18) 0.055(2) 0.0433(19) -0.0087(17) 0.0148(15) 0.0005(15)
C3 0.0436(18) 0.052(2) 0.0361(18) 0.0019(16) 0.0109(15) 0.0028(15)
C4 0.0379(17) 0.0449(19) 0.0402(18) -0.0013(15) 0.0166(14) 0.0002(14)
C5 0.0401(18) 0.0430(18) 0.0412(18) -0.0016(15) 0.0145(15) 0.0011(14)
C6 0.0444(18) 0.050(2) 0.0433(19) 0.0037(16) 0.0198(15) 0.0070(15)
C7 0.0419(17) 0.0392(18) 0.0351(16) 0.0003(14) 0.0110(14) 0.0008(14)
C8 0.0483(19) 0.050(2) 0.0411(18) -0.0042(16) 0.0178(16) -0.0023(16)
C9 0.054(2) 0.050(2) 0.0447(19) 0.0019(16) 0.0231(17) -0.0009(16)
C10 0.0459(19) 0.044(2) 0.0400(17) -0.0029(15) 0.0138(15) -0.0047(14)
C11 0.074(2) 0.053(2) 0.046(2) -0.0013(17) 0.0318(19) 0.0012(18)
C12 0.083(3) 0.042(2) 0.047(2) 0.0048(17) 0.0310(19) -0.0028(18)
C13 0.068(2) 0.065(2) 0.051(2) -0.0165(19) 0.0116(19) -0.008(2)
C14 0.056(2) 0.0421(19) 0.052(2) -0.0043(16) 0.0210(17) -0.0041(16)
C15 0.148(5) 0.056(3) 0.098(4) 0.019(3) 0.067(3) 0.019(3)
C16 0.100(4) 0.062(3) 0.186(6) 0.019(3) 0.072(4) 0.017(2)
C17 0.158(5) 0.058(3) 0.088(3) -0.019(3) 0.003(3) -0.008(3)
 
_geom_special_details
;
 All esds (except the esd in the dihedral angle between two l.s. planes)
 are estimated using the full covariance matrix.  The cell esds are taken
 into account individually in the estimation of esds in distances, angles
 and torsion angles; correlations between esds in cell parameters are only
 used when they are defined by crystal symmetry.  An approximate (isotropic)
 treatment of cell esds is used for estimating esds involving l.s. planes.
;
 
loop_
 _geom_bond_atom_site_label_1
 _geom_bond_atom_site_label_2
 _geom_bond_distance
 _geom_bond_site_symmetry_2
 _geom_bond_publ_flag
Br1 C1 1.879(3) . ?
S1 N1 1.611(3) . ?
S1 N2 1.614(3) . ?
N1 C6 1.341(4) . ?
N2 C5 1.349(4) . ?
C1 C2 1.369(4) . ?
C1 C6 1.417(4) . ?
C2 C3 1.418(5) . ?
C2 C13 1.509(5) . ?
C3 C4 1.381(4) . ?
C4 C5 1.432(4) . ?
C4 C7 1.475(4) . ?
C5 C6 1.440(4) . ?
C7 C12 1.369(4) . ?
C7 C8 1.385(4) . ?
C8 C9 1.386(5) . ?
C9 C10 1.399(5) . ?
C10 C11 1.383(5) . ?
C10 C14 1.520(4) . ?
C11 C12 1.384(5) . ?
C14 C17 1.510(6) . ?
C14 C16 1.511(5) . ?
C14 C15 1.537(5) . ?
 
loop_
 _geom_angle_atom_site_label_1
 _geom_angle_atom_site_label_2
 _geom_angle_atom_site_label_3
 _geom_angle
 _geom_angle_site_symmetry_1
 _geom_angle_site_symmetry_3
 _geom_angle_publ_flag
N1 S1 N2 101.27(14) . . ?
C6 N1 S1 106.2(2) . . ?
C5 N2 S1 106.5(2) . . ?
C2 C1 C6 119.7(3) . . ?
C2 C1 Br1 122.4(3) . . ?
C6 C1 Br1 117.8(2) . . ?
C1 C2 C3 118.7(3) . . ?
C1 C2 C13 122.5(3) . . ?
C3 C2 C13 118.8(3) . . ?
C4 C3 C2 125.9(3) . . ?
C3 C4 C5 114.6(3) . . ?
C3 C4 C7 121.7(3) . . ?
C5 C4 C7 123.6(3) . . ?
N2 C5 C4 126.4(3) . . ?
N2 C5 C6 112.4(3) . . ?
C4 C5 C6 121.2(3) . . ?
N1 C6 C1 126.4(3) . . ?
N1 C6 C5 113.7(3) . . ?
C1 C6 C5 119.9(3) . . ?
C12 C7 C8 117.9(3) . . ?
C12 C7 C4 121.2(3) . . ?
C8 C7 C4 120.6(3) . . ?
C7 C8 C9 120.8(3) . . ?
C8 C9 C10 121.8(3) . . ?
C11 C10 C9 115.8(3) . . ?
C11 C10 C14 121.3(3) . . ?
C9 C10 C14 122.8(3) . . ?
C10 C11 C12 122.3(3) . . ?
C7 C12 C11 121.2(3) . . ?
C17 C14 C16 109.4(4) . . ?
C17 C14 C10 109.8(3) . . ?
C16 C14 C10 109.6(3) . . ?
C17 C14 C15 109.1(4) . . ?
C16 C14 C15 106.2(4) . . ?
C10 C14 C15 112.7(3) . . ?
 
_refine_diff_density_max    0.450
_refine_diff_density_min   -0.385
_refine_diff_density_rms    0.134

_shelx_res_file
;

    shelx.res created by SHELXL-2014/7

TITL TT7 in C2/c
CELL 0.71073  18.6401  14.9843  12.6094  90.000 112.356  90.000
ZERR   8.00   0.0012   0.0010   0.0009   0.000   0.003   0.000
LATT  7
SYMM -X, Y, 0.5-Z
SFAC C N H S BR
UNIT 136 16 136 8 8
TEMP 23.000
L.S. 20
BOND
FMAP 2
PLAN -20
MPLA 6 C7 C8 C9 C10 C11 C12
MPLA 9 C1 C2 C3 C4 C5 C6 N1 N2 S1
ACTA
WGHT    0.073900
FVAR       0.05758   0.06078   0.14597
BR1   5    0.124447    0.056416    0.822743    11.00000    0.11061    0.04346 =
         0.07672   -0.00794    0.03460   -0.00002
S1    4    0.017144   -0.138534    0.505302    11.00000    0.07200    0.06043 =
         0.03924    0.00575    0.01607    0.00248
N1    2    0.048408   -0.063294    0.603467    11.00000    0.06463    0.04986 =
         0.05027    0.00609    0.02147    0.00533
N2    2    0.041553   -0.228702    0.580564    11.00000    0.05266    0.05348 =
         0.03677   -0.00259    0.01403   -0.00245
C1    1    0.115913   -0.068561    0.813380    11.00000    0.05468    0.03838 =
         0.04921   -0.00343    0.02164    0.00135
C2    1    0.144837   -0.122372    0.907919    11.00000    0.04200    0.05469 =
         0.04330   -0.00872    0.01477    0.00047
C3    1    0.139632   -0.216228    0.892263    11.00000    0.04363    0.05194 =
         0.03605    0.00189    0.01090    0.00275
AFIX  44
H3    3    0.159041   -0.250755    0.956728    11.00000   21.00000
AFIX   0
C4    1    0.107907   -0.260209    0.788484    11.00000    0.03788    0.04489 =
         0.04021   -0.00129    0.01664    0.00016
C5    1    0.076642   -0.202836    0.690824    11.00000    0.04006    0.04302 =
         0.04117   -0.00155    0.01454    0.00114
C6    1    0.080175   -0.107244    0.703130    11.00000    0.04440    0.04950 =
         0.04327    0.00365    0.01980    0.00701
C7    1    0.110258   -0.358302    0.780709    11.00000    0.04192    0.03920 =
         0.03506    0.00027    0.01097    0.00081
C8    1    0.095375   -0.411685    0.859621    11.00000    0.04832    0.05015 =
         0.04114   -0.00416    0.01776   -0.00234
AFIX  44
H8    3    0.075432   -0.383345    0.916812    11.00000   21.00000
AFIX   0
C9    1    0.107199   -0.503086    0.861971    11.00000    0.05435    0.04957 =
         0.04466    0.00192    0.02311   -0.00091
AFIX  44
H9    3    0.094554   -0.540747    0.919573    11.00000   21.00000
AFIX   0
C10   1    0.136069   -0.544935    0.787215    11.00000    0.04586    0.04361 =
         0.04004   -0.00287    0.01383   -0.00465
C11   1    0.148131   -0.490132    0.707305    11.00000    0.07386    0.05274 =
         0.04599   -0.00126    0.03185    0.00117
AFIX  44
H11   3    0.165567   -0.515306    0.654331    11.00000   21.00000
AFIX   0
C12   1    0.135096   -0.399017    0.703600    11.00000    0.08276    0.04234 =
         0.04692    0.00477    0.03096   -0.00282
AFIX  44
H12   3    0.143204   -0.365498    0.648783    11.00000   21.00000
AFIX   0
C13   1    0.183619   -0.085679    1.027703    11.00000    0.06828    0.06549 =
         0.05082   -0.01654    0.01159   -0.00810
AFIX 137
H13A  3    0.226011   -0.047842    1.031152    11.00000   31.00000
H13B  3    0.202797   -0.134098    1.080892    11.00000   31.00000
H13C  3    0.146730   -0.051745    1.047295    11.00000   31.00000
AFIX   0
C14   1    0.154632   -0.644065    0.793350    11.00000    0.05638    0.04206 =
         0.05176   -0.00433    0.02100   -0.00411
C15   1    0.147445   -0.689749    0.898008    11.00000    0.14795    0.05583 =
         0.09819    0.01905    0.06689    0.01902
AFIX 137
H15A  3    0.176739   -0.656845    0.966088    11.00000   31.00000
H15B  3    0.167199   -0.749525    0.904539    11.00000   31.00000
H15C  3    0.093908   -0.691409    0.888763    11.00000   31.00000
AFIX   0
C16   1    0.237726   -0.657087    0.805125    11.00000    0.09986    0.06214 =
         0.18623    0.01894    0.07212    0.01734
AFIX 137
H16A  3    0.243808   -0.635678    0.737271    11.00000   31.00000
H16B  3    0.250548   -0.719390    0.815061    11.00000   31.00000
H16C  3    0.271603   -0.624462    0.870522    11.00000   31.00000
AFIX   0
C17   1    0.101104   -0.689820    0.685560    11.00000    0.15831    0.05844 =
         0.08805   -0.01903    0.00310   -0.00800
AFIX 137
H17A  3    0.049628   -0.691948    0.685549    11.00000   31.00000
H17B  3    0.119189   -0.749445    0.682901    11.00000   31.00000
H17C  3    0.100473   -0.657149    0.619721    11.00000   31.00000
AFIX   0
HKLF 4

REM  TT7 in C2/c
REM R1 =  0.0434 for    2053 Fo > 4sig(Fo)  and  0.1207 for all    4057 data
REM    201 parameters refined using      0 restraints

END

WGHT      0.0739      0.0000

REM Highest difference peak  0.450,  deepest hole -0.385,  1-sigma level  0.134
Q1    1   0.1763 -0.6678  0.6988  11.00000  0.05    0.38
Q2    1   0.0632 -0.5319  0.8753  11.00000  0.05    0.37
Q3    1   0.1297 -0.5155  0.8358  11.00000  0.05    0.37
Q4    1   0.1535 -0.6573  0.6432  11.00000  0.05    0.36
Q5    1   0.0427 -0.5129  1.0009  11.00000  0.05    0.36
Q6    1   0.0046 -0.5537  0.9733  11.00000  0.05    0.35
Q7    1   0.0593 -0.5842  0.9874  11.00000  0.05    0.35
Q8    1   0.0999 -0.5516  0.7880  11.00000  0.05    0.35
Q9    1   0.0607 -0.4334  0.8421  11.00000  0.05    0.34
Q10   1   0.0409 -0.4487  0.9996  11.00000  0.05    0.34
Q11   1  -0.0154 -0.5015  0.9449  11.00000  0.05    0.33
Q12   1   0.0778 -0.5151  0.7644  11.00000  0.05    0.33
Q13   1   0.0228 -0.4720  0.8582  11.00000  0.05    0.33
Q14   1   0.0241 -0.4636  0.7602  11.00000  0.05    0.32
Q15   1  -0.0044 -0.5131  0.8559  11.00000  0.05    0.32
Q16   1   0.1182 -0.3466  0.7453  11.00000  0.05    0.32
Q17   1   0.0435 -0.5537  0.7964  11.00000  0.05    0.31
Q18   1   0.0210 -0.4149  0.8850  11.00000  0.05    0.31
Q19   1   0.1093 -0.4600  0.6749  11.00000  0.05    0.31
Q20   1   0.0071 -0.6474  0.6777  11.00000  0.05    0.31
;
_shelx_res_checksum   37745

_shelx_hkl_file
;
  -2   0   0   65.55    1.96
   2   0   0   51.98    1.95
  -2   0   0   65.45    1.96
  -4   0   0  897.34   27.39
  -4   0   0  960.79   28.52
   4   0   0  932.64   28.60
  -4   0   0  870.77   28.54
  -4   0   0  937.38   27.35
  -6   0   0    0.04    0.08
  -6   0   0    0.01    0.10
  -6   0   0   -0.06    0.08
   6   0   0    0.10    0.10
  -6   0   0    0.01    0.10
  -8   0   0  198.12    6.05
  -8   0   0  193.57    6.28
  -8   0   0  200.23    6.27
  -8   0   0  200.05    6.03
   8   0   0  206.19    6.28
 -10   0   0    0.63    0.16
 -10   0   0    0.87    0.17
  10   0   0    0.47    0.16
 -10   0   0    0.43    0.18
 -10   0   0    1.19    0.19
  12   0   0   12.77    0.56
 -12   0   0   13.31    0.66
 -12   0   0   12.49    0.57
 -12   0   0   14.21    0.62
 -14   0   0   -0.12    0.23
  14   0   0   -0.01    0.12
 -14   0   0    0.20    0.21
 -14   0   0   -0.08    0.14
 -16   0   0    0.36    0.31
 -18   0   0    0.33    0.33
 -20   0   0    0.47    0.37
 -22   0   0   -0.09    0.37
  -1  -1   0   -0.02    0.02
   1  -1   0    0.01    0.02
  -1  -1   0    0.01    0.02
   1  -1   0   -0.03    0.03
   1  -1   0   -0.04    0.02
   1  -1   0    0.02    0.02
  -1   1   0   -0.03    0.03
  -1   1   0   -0.06    0.02
   1   1   0   -0.04    0.02
  -1   1   0   -0.01    0.03
   1   1   0    0.02    0.02
  -1   1   0    0.00    0.02
   1   1   0    0.00    0.01
   3  -1   0    5.66    0.30
   3  -1   0    5.67    0.27
   3  -1   0    5.59    0.29
  -3   1   0    5.48    0.29
  -3   1   0    5.54    0.27
  -3   1   0    5.73    0.24
  -3   1   0    5.69    0.28
  -3   1   0    5.43    0.30
   5  -1   0    0.63    0.11
   5  -1   0    0.41    0.13
  -5   1   0    0.47    0.14
  -5   1   0    0.67    0.15
  -5   1   0    0.68    0.14
  -5   1   0    0.40    0.11
  -7  -1   0    8.76    0.34
   7  -1   0    9.26    0.48
   7  -1   0    9.16    0.36
  -7   1   0    9.62    0.44
  -7   1   0    8.68    0.46
  -7   1   0    9.09    0.46
  -7   1   0    8.72    0.47
   9  -1   0    5.88    0.40
  -9  -1   0    5.62    0.31
  -9  -1   0    5.76    0.29
  -9   1   0    6.17    0.39
  -9   1   0    6.25    0.39
  -9   1   0    5.39    0.40
  -9   1   0    5.83    0.43
 -11  -1   0    3.79    0.27
 -11  -1   0    3.83    0.29
  11  -1   0    3.92    0.36
 -11   1   0    4.41    0.41
 -11   1   0    3.72    0.35
 -11   1   0    3.96    0.36
 -11   1   0    4.91    0.39
 -13  -1   0    4.79    0.35
 -13  -1   0    4.60    0.36
 -13  -1   0    5.48    0.33
  13  -1   0    5.30    0.42
 -13   1   0    4.41    0.46
 -13   1   0    5.11    0.41
 -13   1   0    4.44    0.42
  15  -1   0    3.07    0.33
 -15  -1   0    3.19    0.35
 -15  -1   0    3.35    0.32
 -15   1   0    3.30    0.34
 -15   1   0    2.50    0.43
 -17  -1   0    0.22    0.27
  17  -1   0    0.90    0.19
 -17   1   0    0.60    0.36
 -19  -1   0    1.32    0.35
 -19   1   0    1.25    0.43
 -21  -1   0    0.23    0.34
 -21   1   0   -0.37    0.40
   0  -2   0   63.86    2.14
   0  -2   0   65.44    2.15
   0  -2   0   65.17    2.15
   0  -2   0   66.62    2.06
   0  -2   0   64.12    2.06
   0   2   0   64.92    2.05
   0   2   0   67.07    2.07
   0   2   0   67.00    2.15
   0   2   0   66.91    2.15
   2  -2   0    5.82    0.30
   2  -2   0    5.48    0.31
  -2  -2   0    5.15    0.26
   2  -2   0    5.74    0.34
   2  -2   0    5.22    0.31
  -2  -2   0    5.45    0.25
   2  -2   0    5.50    0.33
  -2  -2   0    5.43    0.28
  -2  -2   0    5.24    0.27
  -2   2   0    5.39    0.29
  -2   2   0    6.43    0.32
  -2   2   0    5.22    0.31
   2   2   0    5.57    0.24
  -2   2   0    6.06    0.34
   2   2   0    5.61    0.27
  -2   2   0    6.03    0.35
   2   2   0    5.77    0.28
   2   2   0    5.21    0.25
  -4  -2   0  151.05    4.50
   4  -2   0  149.40    4.83
   4  -2   0  145.45    4.60
  -4  -2   0  150.57    4.69
  -4  -2   0  141.87    4.49
  -4  -2   0  155.95    4.69
  -4   2   0  150.39    4.62
  -4   2   0  153.50    4.82
  -4   2   0  153.50    4.84
  -4   2   0  147.57    4.82
  -4   2   0  147.77    4.63
   4   2   0  156.03    4.69
   4   2   0  152.64    4.69
   6  -2   0    0.51    0.19
   6  -2   0    0.74    0.20
  -6   2   0    0.88    0.20
  -6   2   0    0.55    0.18
  -6   2   0    0.79    0.21
  -6   2   0    0.62    0.17
  -6   2   0    0.81    0.13
   8  -2   0   32.21    1.13
   8  -2   0   34.97    1.30
  -8   2   0   31.07    1.25
  -8   2   0   32.93    1.28
  -8   2   0   32.46    1.13
  -8   2   0   32.69    1.25
  -8   2   0   33.59    1.21
  10  -2   0    0.33    0.14
  10  -2   0   -0.10    0.19
 -10   2   0    0.19    0.18
 -10   2   0    0.01    0.19
 -10   2   0    0.56    0.25
 -10   2   0    0.03    0.18
  12  -2   0    9.70    0.61
 -12  -2   0    9.79    0.43
 -12  -2   0   10.00    0.44
 -12   2   0    9.57    0.68
 -12   2   0    9.87    0.59
 -12   2   0    9.52    0.62
 -14  -2   0    0.36    0.18
 -14  -2   0   -0.04    0.18
  14  -2   0   -0.10    0.22
 -14  -2   0   -0.14    0.16
 -14   2   0   -0.17    0.28
 -14   2   0    0.22    0.24
 -16  -2   0    1.78    0.27
  16  -2   0    1.42    0.32
 -16   2   0    1.87    0.34
 -16   2   0    2.38    0.48
  18  -2   0    0.07    0.23
 -18  -2   0    0.08    0.25
 -18   2   0   -0.12    0.37
 -20   2   0    0.22    0.44
 -22   2   0   -0.35    0.45
  -1  -3   0    0.40    0.14
   1  -3   0    0.19    0.14
  -1  -3   0    0.49    0.15
   1  -3   0    0.17    0.14
   1  -3   0    0.31    0.14
  -1  -3   0    0.37    0.11
  -1  -3   0    0.39    0.13
   1  -3   0    0.59    0.16
   1  -3   0    0.56    0.16
  -1  -3   0    0.25    0.13
  -1   3   0    0.50    0.16
   1   3   0    0.01    0.12
   1   3   0    0.38    0.14
  -1   3   0    0.44    0.15
  -1   3   0    0.29    0.15
   1   3   0    0.05    0.07
   1   3   0    0.21    0.13
  -1   3   0    0.27    0.13
  -3  -3   0   96.89    2.97
   3  -3   0   92.39    3.17
   3  -3   0   96.85    3.20
   3  -3   0   92.32    3.03
  -3  -3   0   92.53    2.96
   3  -3   0   98.10    3.20
  -3  -3   0   96.09    3.09
  -3  -3   0   96.85    3.09
  -3   3   0   98.30    3.20
  -3   3   0   95.96    3.20
   3   3   0   94.24    3.09
   3   3   0   98.10    3.10
  -3   3   0   94.48    3.04
  -3   3   0   93.68    3.06
   3   3   0   97.63    2.94
   3   3   0   98.72    2.93
  -5  -3   0   43.93    1.45
   5  -3   0   45.67    1.64
  -5  -3   0   43.08    1.40
  -5  -3   0   43.40    1.39
   5  -3   0   44.09    1.51
  -5  -3   0   43.01    1.45
   5   3   0   42.62    1.44
  -5   3   0   42.61    1.56
  -5   3   0   42.95    1.53
   5   3   0   44.71    1.46
  -5   3   0   42.41    1.62
  -5   3   0   45.66    1.54
  -5   3   0   45.09    1.63
   7  -3   0    0.07    0.16
   7  -3   0    0.32    0.20
   7  -3   0    0.05    0.19
  -7   3   0   -0.07    0.17
  -7   3   0   -0.05    0.19
  -7   3   0    0.18    0.19
  -7   3   0    0.28    0.14
  -7   3   0    0.34    0.19
   9  -3   0    3.57    0.33
   9  -3   0    3.22    0.41
  -9   3   0    3.55    0.41
  -9   3   0    4.77    0.43
  -9   3   0    4.12    0.44
  -9   3   0    3.69    0.41
  11  -3   0    2.74    0.40
  11  -3   0    3.21    0.30
 -11   3   0    3.19    0.41
 -11   3   0    2.91    0.38
 -11   3   0    2.25    0.40
  13  -3   0    3.91    0.47
 -13  -3   0    3.74    0.40
 -13   3   0    4.21    0.54
 -13   3   0    4.40    0.50
 -13   3   0    3.26    0.45
  15  -3   0    0.24    0.30
 -15  -3   0    0.17    0.23
 -15   3   0    0.66    0.31
 -15   3   0    0.26    0.38
  17  -3   0    1.39    0.36
 -17   3   0    0.93    0.46
 -19   3   0    0.56    0.47
 -21   3   0    0.17    0.51
   0  -4   0   32.77    1.17
   0  -4   0   29.80    1.16
   0  -4   0   32.67    1.23
   0  -4   0   30.55    1.22
   0  -4   0   31.47    1.08
   0   4   0   31.80    1.17
   0   4   0   31.88    1.23
   0   4   0   30.13    1.22
   2  -4   0    1.03    0.24
  -2  -4   0    0.95    0.20
   2  -4   0    1.40    0.24
  -2  -4   0    0.95    0.20
  -2  -4   0    1.46    0.23
   2  -4   0    1.14    0.23
   2  -4   0    1.44    0.26
  -2  -4   0    1.44    0.22
   2   4   0    0.67    0.15
  -2   4   0    1.66    0.28
  -2   4   0    1.32    0.25
  -2   4   0    1.48    0.27
   2   4   0    1.07    0.22
   2   4   0    1.28    0.21
   4  -4   0   34.69    1.29
   4  -4   0   34.47    1.31
  -4  -4   0   32.73    1.18
  -4  -4   0   34.65    1.19
   4  -4   0   35.77    1.39
   4  -4   0   36.24    1.39
  -4  -4   0   35.17    1.24
  -4  -4   0   33.84    1.24
  -4   4   0   33.29    1.37
   4   4   0   34.05    1.07
   4   4   0   34.45    1.24
  -4   4   0   33.68    1.29
  -4   4   0   34.91    1.39
   4   4   0   33.06    1.14
   4   4   0   32.51    1.24
  -4   4   0   34.56    1.33
  -6  -4   0    6.00    0.33
   6  -4   0    5.86    0.38
   6  -4   0    6.28    0.53
  -6  -4   0    5.70    0.34
   6  -4   0    5.54    0.46
  -6  -4   0    5.86    0.33
  -6  -4   0    5.15    0.35
   6   4   0    6.32    0.35
  -6   4   0    6.06    0.53
  -6   4   0    5.99    0.53
  -6   4   0    6.27    0.49
   6   4   0    5.64    0.34
  -6   4   0    6.16    0.53
  -8  -4   0    0.52    0.14
   8  -4   0    0.24    0.20
  -8  -4   0    0.44    0.11
   8  -4   0    0.36    0.26
  -8  -4   0    0.35    0.14
   8  -4   0    0.19    0.23
  -8  -4   0    0.36    0.11
  -8   4   0    0.37    0.24
  -8   4   0    0.12    0.23
  -8   4   0    0.21    0.26
   8   4   0    0.35    0.10
  -8   4   0    0.41    0.22
 -10  -4   0    1.22    0.16
  10  -4   0    1.12    0.32
 -10  -4   0    1.23    0.16
 -10   4   0    1.24    0.31
 -10   4   0    1.64    0.34
 -10   4   0    1.52    0.33
 -10   4   0    0.79    0.33
  12  -4   0    5.91    0.60
  12  -4   0    6.00    0.46
 -12   4   0    5.41    0.57
 -12   4   0    4.99    0.60
 -12   4   0    6.91    0.63
 -14  -4   0    0.55    0.28
  14  -4   0    0.69    0.33
 -14   4   0    0.61    0.42
 -14   4   0    1.18    0.35
  16  -4   0    0.27    0.34
 -16   4   0    0.17    0.42
 -18   4   0    0.46    0.50
 -20   4   0    0.48    0.53
 -22   4   0   -0.09    0.55
   1  -5   0   43.99    1.67
  -1  -5   0   42.18    1.63
  -1  -5   0   43.30    1.55
  -1  -5   0   42.72    1.63
  -1  -5   0   42.12    1.55
   1  -5   0   43.13    1.58
  -1  -5   0   43.11    1.53
   1  -5   0   45.82    1.68
   1   5   0   44.86    1.64
  -1   5   0   41.88    1.59
   1   5   0   41.46    1.54
   1   5   0   42.99    1.64
  -1   5   0   43.55    1.66
   3  -5   0   23.57    1.06
   3  -5   0   20.64    1.03
  -3  -5   0   22.67    0.96
   3  -5   0   23.19    1.01
  -3  -5   0   21.36    0.91
   3  -5   0   21.54    0.98
  -3  -5   0   22.46    0.95
  -3  -5   0   22.89    0.98
  -3  -5   0   23.95    0.92
   3   5   0   23.50    0.97
   3   5   0   21.47    0.96
  -3   5   0   21.72    1.04
  -3   5   0   23.05    1.02
   3   5   0   22.64    0.89
  -3   5   0   22.56    1.05
   5  -5   0    0.05    0.22
  -5  -5   0    0.22    0.17
   5  -5   0    0.21    0.23
   5  -5   0    0.37    0.20
   5  -5   0    0.10    0.22
  -5  -5   0   -0.06    0.14
  -5  -5   0   -0.13    0.14
  -5  -5   0    0.29    0.17
   5   5   0    0.45    0.18
  -5   5   0    0.04    0.22
  -5   5   0   -0.03    0.23
  -5   5   0    0.27    0.23
   5   5   0    0.29    0.10
   5   5   0    0.24    0.13
   5   5   0    0.15    0.17
  -7  -5   0    5.51    0.36
   7  -5   0    6.39    0.54
  -7  -5   0    5.73    0.39
  -7  -5   0    5.65    0.38
   7  -5   0    4.53    0.50
  -7  -5   0    6.34    0.39
   7  -5   0    5.80    0.58
  -7   5   0    5.59    0.56
   7   5   0    5.45    0.37
   7   5   0    6.04    0.37
  -7   5   0    6.24    0.58
  -7   5   0    6.11    0.59
  -9  -5   0    3.21    0.28
   9  -5   0    3.61    0.43
  -9  -5   0    2.79    0.23
   9  -5   0    2.51    0.45
   9  -5   0    2.89    0.46
  -9  -5   0    2.48    0.26
  -9   5   0    3.43    0.48
  -9   5   0    3.46    0.46
   9   5   0    2.74    0.21
   9   5   0    2.67    0.22
  -9   5   0    2.13    0.39
  11  -5   0   -0.16    0.26
  11  -5   0    0.24    0.23
 -11  -5   0   -0.18    0.14
 -11  -5   0    0.10    0.16
 -11   5   0   -0.04    0.26
 -11   5   0   -0.02    0.32
  13  -5   0    0.16    0.33
 -13  -5   0    0.32    0.15
 -13  -5   0    0.24    0.27
 -13   5   0    0.24    0.40
 -13   5   0    0.40    0.32
 -15  -5   0    0.02    0.27
  15  -5   0   -0.05    0.34
 -15   5   0   -0.24    0.40
 -17   5   0   -0.35    0.49
 -19   5   0   -0.03    0.52
 -21   5   0   -0.05    0.56
   0  -6   0   39.04    1.58
   0  -6   0   38.18    1.50
   0  -6   0   40.98    1.59
   0  -6   0   40.05    1.61
   0   6   0   37.67    1.49
   0   6   0   38.04    1.58
   0   6   0   38.63    1.57
   2  -6   0    1.69    0.34
  -2  -6   0    2.36    0.33
  -2  -6   0    2.38    0.28
   2  -6   0    2.48    0.37
  -2  -6   0    2.44    0.33
   2  -6   0    2.41    0.37
  -2  -6   0    2.43    0.34
   2  -6   0    2.43    0.39
  -2  -6   0    2.46    0.34
  -2   6   0    1.98    0.34
  -2   6   0    2.12    0.37
   2   6   0    2.31    0.32
   2   6   0    2.82    0.37
  -2   6   0    2.41    0.38
   4  -6   0   49.13    1.96
  -4  -6   0   52.21    1.82
  -4  -6   0   53.12    1.98
   4  -6   0   52.30    2.04
  -4  -6   0   51.54    1.89
   4  -6   0   49.79    1.90
   4  -6   0   51.07    2.03
  -4  -6   0   51.28    1.81
  -4  -6   0   53.18    1.90
  -4   6   0   50.77    2.01
  -4   6   0   50.34    1.95
  -4   6   0   48.64    2.01
   4   6   0   50.80    1.90
   4   6   0   52.39    1.90
  -6  -6   0    4.27    0.40
  -6  -6   0    3.93    0.38
   6  -6   0    4.00    0.43
   6  -6   0    4.29    0.52
  -6  -6   0    4.05    0.39
   6  -6   0    5.13    0.56
  -6  -6   0    4.85    0.41
   6  -6   0    4.65    0.51
  -6   6   0    4.47    0.55
   6   6   0    4.32    0.41
   6   6   0    5.15    0.43
  -6   6   0    4.63    0.55
  -6   6   0    4.38    0.53
   6   6   0    4.66    0.33
   8  -6   0    0.69    0.31
  -8  -6   0    1.08    0.23
   8  -6   0    1.18    0.37
   8  -6   0    0.99    0.36
  -8  -6   0    1.02    0.22
  -8  -6   0    1.12    0.25
  -8  -6   0    0.77    0.20
  -8   6   0    1.07    0.35
  -8   6   0    1.05    0.35
   8   6   0    1.12    0.23
   8   6   0    0.70    0.22
  -8   6   0    0.39    0.31
 -10  -6   0   -0.10    0.19
  10  -6   0   -0.12    0.28
  10  -6   0    0.36    0.28
 -10  -6   0    0.06    0.18
  10   6   0    0.04    0.14
 -10   6   0   -0.11    0.32
  10   6   0   -0.06    0.13
 -10   6   0   -0.08    0.24
 -12  -6   0    8.82    0.49
  12  -6   0    9.52    0.68
 -12  -6   0    8.40    0.49
 -12  -6   0    7.48    0.71
  12  -6   0    9.44    0.85
 -12   6   0    9.53    0.84
 -12   6   0    8.50    0.85
 -14  -6   0    0.65    0.20
 -14  -6   0    0.53    0.22
 -14  -6   0    0.42    0.33
 -14   6   0    0.32    0.46
 -16   6   0    0.68    0.55
 -18   6   0    0.28    0.53
 -20   6   0   -0.43    0.57
   1  -7   0   69.38    2.68
  -1  -7   0   72.09    2.46
  -1  -7   0   72.15    2.63
  -1  -7   0   68.46    2.68
   1  -7   0   72.70    2.68
  -1  -7   0   66.62    2.48
  -1  -7   0   70.34    2.61
   1  -7   0   72.57    2.66
   1   7   0   71.58    2.63
  -1   7   0   72.94    2.54
   1   7   0   68.79    2.62
   1   7   0   74.56    2.51
  -1   7   0   71.25    2.65
   3  -7   0  107.77    3.90
  -3  -7   0  109.97    3.82
   3  -7   0  112.13    3.71
  -3  -7   0  112.70    3.80
   3  -7   0  105.99    3.88
  -3  -7   0  110.94    3.79
   3  -7   0  108.84    3.89
  -3  -7   0  111.69    3.63
  -3  -7   0  106.61    3.62
  -3   7   0  109.30    3.72
   3   7   0  112.60    3.61
   3   7   0  116.08    3.83
  -3   7   0  105.43    3.89
  -3   7   0  111.37    3.90
  -5  -7   0   55.00    2.05
   5  -7   0   60.62    2.35
  -5  -7   0   61.94    2.28
  -5  -7   0   56.80    2.14
   5  -7   0   55.55    2.32
  -5  -7   0   56.39    2.14
  -5  -7   0   55.93    2.06
   5  -7   0   58.35    2.26
  -5   7   0   59.84    2.23
   5   7   0   59.91    2.16
  -5   7   0   59.08    2.02
   5   7   0   59.28    2.18
  -5   7   0   59.69    2.33
  -5   7   0   57.51    2.32
   7  -7   0    3.28    0.47
   7  -7   0    2.31    0.47
  -7  -7   0    2.57    0.37
  -7  -7   0    2.78    0.36
   7  -7   0    2.69    0.41
  -7  -7   0    3.13    0.37
  -7  -7   0    2.36    0.34
   7  -7   0    2.61    0.48
  -7   7   0    3.55    0.55
  -7   7   0    2.24    0.47
  -7   7   0    2.95    0.51
   7   7   0    2.81    0.36
   7   7   0    3.48    0.28
   7   7   0    3.13    0.38
  -9  -7   0    0.65    0.24
   9  -7   0    0.97    0.37
   9  -7   0    1.28    0.43
  -9  -7   0    0.43    0.21
   9  -7   0    0.58    0.33
  -9  -7   0    0.29    0.25
   9   7   0    0.67    0.23
   9   7   0    0.38    0.21
  -9   7   0    0.67    0.41
  -9   7   0    0.68    0.36
  11  -7   0   11.02    0.97
 -11  -7   0   12.17    0.86
 -11  -7   0   11.59    0.64
 -11  -7   0   11.22    0.64
  11  -7   0   12.78    0.83
 -11   7   0   10.93    0.97
  11   7   0   11.73    0.53
  11   7   0   11.41    0.53
 -11   7   0   13.00    0.92
 -13  -7   0    4.47    0.61
 -13  -7   0    4.02    0.41
 -13   7   0    3.88    0.68
 -15  -7   0    0.01    0.36
 -15  -7   0    0.06    0.24
 -15   7   0    0.08    0.47
 -17   7   0    0.80    0.60
 -19   7   0   -0.96    0.53
 -21   7   0   -0.67    0.62
   0  -8   0   23.38    1.15
   0  -8   0   21.57    1.19
   0  -8   0   24.28    1.21
   0  -8   0   23.34    1.19
   0   8   0   24.04    1.15
   0   8   0   24.96    1.22
   0   8   0   23.94    1.23
  -2  -8   0    1.82    0.28
  -2  -8   0    1.77    0.37
   2  -8   0    1.38    0.36
   2  -8   0    1.76    0.39
   2  -8   0    1.69    0.39
  -2  -8   0    1.49    0.38
   2  -8   0    1.34    0.38
  -2  -8   0    1.91    0.38
  -2  -8   0    2.38    0.41
  -2   8   0    1.15    0.38
   2   8   0    1.58    0.38
   2   8   0    2.07    0.37
  -2   8   0    2.22    0.42
  -2   8   0    1.28    0.37
   2   8   0    2.63    0.41
  -4  -8   0   58.75    2.16
   4  -8   0   58.80    2.35
  -4  -8   0   58.06    2.25
   4  -8   0   58.93    2.40
  -4  -8   0   55.09    2.23
   4  -8   0   59.04    2.26
   4  -8   0   62.82    2.42
  -4  -8   0   61.87    2.18
  -4  -8   0   60.76    2.26
  -4   8   0   58.95    2.40
  -4   8   0   59.26    2.30
   4   8   0   59.90    2.29
   4   8   0   59.18    2.26
  -4   8   0   57.40    2.37
   4   8   0   58.75    2.12
   6  -8   0    4.22    0.53
   6  -8   0    4.43    0.62
  -6  -8   0    4.71    0.51
  -6  -8   0    5.23    0.52
   6  -8   0    5.64    0.66
  -6  -8   0    5.20    0.53
   6  -8   0    5.29    0.62
  -6  -8   0    5.18    0.53
  -6   8   0    4.30    0.61
  -6   8   0    5.06    0.64
  -6   8   0    5.71    0.37
   6   8   0    5.47    0.46
   6   8   0    5.44    0.37
  -6   8   0    4.82    0.62
   6   8   0    5.28    0.54
   6   8   0    5.15    0.53
   8  -8   0    6.44    0.69
  -8  -8   0    6.13    0.55
   8  -8   0    5.26    0.68
  -8  -8   0    6.46    0.55
   8  -8   0    6.13    0.62
  -8  -8   0    5.82    0.54
   8  -8   0    4.80    0.68
  -8  -8   0    6.09    0.68
   8   8   0    5.71    0.54
  -8   8   0    6.47    0.76
  -8   8   0    6.13    0.52
  -8   8   0    5.68    0.71
  -8   8   0    6.07    0.73
   8   8   0    5.88    0.54
 -10  -8   0    0.74    0.37
  10  -8   0    0.09    0.39
  10  -8   0    0.12    0.34
 -10  -8   0    0.12    0.27
 -10  -8   0    0.44    0.26
  10  -8   0    0.82    0.38
  10   8   0    0.43    0.24
  10   8   0    0.07    0.23
 -10   8   0    0.52    0.36
 -10   8   0    0.49    0.30
 -10   8   0    0.06    0.39
 -12  -8   0    8.29    0.60
 -12  -8   0    8.20    0.82
  12   8   0    8.00    0.43
  12   8   0    7.77    0.43
 -12   8   0    7.94    0.92
 -14  -8   0    0.15    0.29
 -14  -8   0    0.43    0.40
 -14   8   0   -0.81    0.50
 -16  -8   0    2.28    0.36
 -16   8   0    2.28    0.73
 -18   8   0    0.21    0.60
 -20   8   0    0.37    0.68
   1  -9   0   21.63    1.24
   1  -9   0   21.69    1.18
  -1  -9   0   21.39    1.19
   1  -9   0   23.88    1.24
  -1  -9   0   23.62    1.23
   1  -9   0   21.30    1.21
  -1  -9   0   21.67    1.23
  -1  -9   0   22.40    1.15
   1   9   0   24.24    1.18
  -1   9   0   23.67    1.26
   1   9   0   19.97    1.17
  -1   9   0   22.83    1.17
   1   9   0   22.31    1.21
  -1   9   0   25.01    1.27
  -3  -9   0   20.52    1.15
   3  -9   0   24.19    1.30
   3  -9   0   20.88    1.19
  -3  -9   0   20.17    1.11
   3  -9   0   23.81    1.29
  -3  -9   0   22.37    1.04
   3  -9   0   22.57    1.25
  -3  -9   0   22.88    1.19
  -3  -9   0   21.13    1.23
  -3   9   0   24.74    1.30
   3   9   0   23.35    1.10
  -3   9   0   23.27    1.26
  -3   9   0   22.80    1.22
   3   9   0   22.95    1.21
   5  -9   0   27.97    1.50
  -5  -9   0   29.80    1.34
   5  -9   0   29.23    1.52
  -5  -9   0   32.51    1.38
  -5  -9   0   30.31    1.38
  -5  -9   0   28.08    1.49
   5  -9   0   28.09    1.44
   5  -9   0   33.00    1.49
  -5   9   0   29.66    1.53
  -5   9   0   28.99    1.52
   5   9   0   28.22    1.37
   5   9   0   27.93    1.37
   5   9   0   30.38    1.27
  -5   9   0   29.09    1.48
   7  -9   0   12.87    0.90
  -7  -9   0   15.18    0.88
   7  -9   0   14.22    1.02
  -7  -9   0   14.81    1.00
   7  -9   0   14.82    1.10
  -7  -9   0   14.68    0.85
   7  -9   0   13.85    0.97
  -7  -9   0   13.45    0.85
   7   9   0   13.93    0.87
  -7   9   0   13.88    1.11
   7   9   0   13.25    0.60
   7   9   0   13.14    0.83
  -7   9   0   13.80    0.66
   7   9   0   14.19    0.72
  -7   9   0   13.68    1.01
  -7   9   0   14.00    1.03
  -9  -9   0   15.67    0.88
   9  -9   0   14.82    0.96
   9  -9   0   14.01    1.11
   9  -9   0   16.21    1.12
  -9  -9   0   14.92    1.06
  -9  -9   0   16.27    0.91
   9  -9   0   16.19    1.15
   9   9   0   15.19    0.85
  -9   9   0   17.20    0.86
   9   9   0   15.69    0.88
  -9   9   0   14.73    1.20
  -9   9   0   15.35    1.09
 -11  -9   0    2.12    0.52
  11  -9   0    1.53    0.50
 -11  -9   0    1.14    0.38
 -11   9   0    1.72    0.52
 -11   9   0    2.47    0.61
  11   9   0    1.55    0.32
  11   9   0    1.60    0.33
 -13  -9   0    5.91    0.58
 -13  -9   0    7.27    0.84
 -13   9   0    5.73    0.87
  13   9   0    6.34    0.38
 -15  -9   0   -0.59    0.36
 -15  -9   0    0.43    0.34
 -15   9   0   -0.11    0.55
 -17  -9   0    1.44    0.35
 -17   9   0    1.08    0.71
 -19   9   0    0.43    0.72
   0 -10   0   53.63    2.23
   0 -10   0   47.62    2.24
   0 -10   0   52.66    2.13
   0 -10   0   51.33    2.21
   0  10   0   52.72    2.13
   0  10   0   51.66    2.25
   0  10   0   53.72    2.24
   2 -10   0    1.99    0.48
   2 -10   0    1.27    0.40
  -2 -10   0    0.90    0.25
  -2 -10   0    1.51    0.40
   2 -10   0    1.48    0.46
   2 -10   0    1.35    0.44
  -2 -10   0    1.02    0.40
  -2 -10   0    1.17    0.38
  -2 -10   0    1.39    0.43
   2  10   0    1.29    0.40
   2  10   0    1.64    0.46
   2  10   0    1.70    0.44
  -2  10   0    0.99    0.42
  -2  10   0    1.63    0.46
  -2  10   0    1.76    0.48
  -4 -10   0    6.56    0.68
   4 -10   0    7.47    0.81
   4 -10   0    6.88    0.76
   4 -10   0    6.38    0.78
   4 -10   0    5.88    0.76
  -4 -10   0    4.96    0.69
  -4 -10   0    5.75    0.66
  -4 -10   0    7.85    0.64
  -4  10   0    7.11    0.81
  -4  10   0    7.15    0.81
   4  10   0    6.41    0.63
  -4  10   0    7.47    0.80
   4  10   0    5.57    0.68
   4  10   0    6.19    0.67
  -6 -10   0    1.80    0.49
  -6 -10   0    3.06    0.51
   6 -10   0    2.90    0.57
   6 -10   0    2.10    0.56
   6 -10   0    2.52    0.55
   6 -10   0    2.23    0.50
  -6 -10   0    2.93    0.48
  -6  10   0    2.58    0.56
   6  10   0    1.99    0.43
  -6  10   0    3.40    0.61
   6  10   0    1.69    0.33
   6  10   0    2.22    0.46
  -6  10   0    2.21    0.55
   8 -10   0   25.78    1.41
   8 -10   0   28.87    1.60
  -8 -10   0   27.77    1.54
  -8 -10   0   28.45    1.34
   8 -10   0   28.16    1.61
   8 -10   0   30.44    1.50
  -8 -10   0   25.70    1.30
  -8  10   0   28.41    1.11
  -8  10   0   29.44    1.62
  -8  10   0   25.66    1.53
   8  10   0   26.90    1.33
   8  10   0   27.74    1.35
 -10 -10   0   -0.12    0.34
 -10 -10   0    0.68    0.42
  10 -10   0    0.11    0.42
  10  10   0   -0.15    0.28
  10  10   0   -0.35    0.27
 -10  10   0   -0.06    0.46
 -10  10   0    0.08    0.38
 -12 -10   0    4.96    0.76
 -12 -10   0    8.03    0.71
 -12  10   0    7.40    0.99
  12  10   0    6.19    0.55
  12  10   0    7.93    0.59
 -14 -10   0    0.95    0.40
 -14 -10   0    1.09    0.52
 -14  10   0    1.21    0.64
 -16 -10   0    1.11    0.40
 -16  10   0    0.41    0.71
 -18 -10   0    0.31    0.36
 -18  10   0    1.08    0.72
   1 -11   0   43.11    2.04
  -1 -11   0   42.35    1.92
  -1 -11   0   46.81    2.03
   1 -11   0   43.12    1.94
   1 -11   0   46.77    2.08
  -1 -11   0   41.66    2.05
  -1 -11   0   44.05    2.01
   1 -11   0   45.56    2.08
   1  11   0   43.68    2.00
  -1  11   0   44.34    2.06
  -1  11   0   42.74    2.03
   1  11   0   40.62    1.99
   1  11   0   45.83    1.92
  -1  11   0   39.28    1.92
  -3 -11   0    1.27    0.48
   3 -11   0    1.11    0.46
  -3 -11   0    0.88    0.30
  -3 -11   0    1.44    0.44
   3 -11   0    1.72    0.50
   3 -11   0    1.44    0.50
   3 -11   0    1.13    0.44
  -3 -11   0    0.84    0.41
  -3  11   0    0.85    0.44
   3  11   0    0.51    0.41
   3  11   0    1.75    0.46
  -3  11   0    1.48    0.49
   3  11   0    0.98    0.42
  -3  11   0    1.36    0.52
   5 -11   0    2.84    0.64
   5 -11   0    2.75    0.61
  -5 -11   0    3.59    0.56
  -5 -11   0    3.18    0.61
   5 -11   0    2.15    0.52
   5 -11   0    3.22    0.64
  -5 -11   0    1.99    0.49
   5  11   0    3.29    0.56
   5  11   0    2.62    0.52
  -5  11   0    2.54    0.59
   5  11   0    2.62    0.47
  -5  11   0    2.90    0.66
  -5  11   0    2.82    0.61
  -7 -11   0   11.96    0.89
   7 -11   0   12.08    1.17
   7 -11   0   11.81    1.08
   7 -11   0   12.09    1.05
  -7 -11   0   11.04    0.93
   7 -11   0   10.48    1.10
  -7 -11   0   12.53    1.13
  -7  11   0   12.65    1.18
   7  11   0   12.63    0.91
   7  11   0   11.93    0.88
  -7  11   0   11.23    1.13
   9 -11   0    4.12    0.65
  -9 -11   0    4.84    0.65
   9 -11   0    3.65    0.76
  -9 -11   0    4.95    0.74
   9 -11   0    3.85    0.71
   9  11   0    3.83    0.56
   9  11   0    4.33    0.57
  -9  11   0    2.63    0.70
  -9  11   0    4.39    0.74
 -11 -11   0    2.06    0.62
 -11 -11   0    2.53    0.51
  11 -11   0    2.56    0.64
  11  11   0    2.21    0.43
 -11  11   0    1.87    0.66
  11  11   0    2.21    0.46
 -13 -11   0    0.06    0.43
 -13 -11   0    0.43    0.42
 -13  11   0   -0.21    0.54
  13  11   0    0.68    0.31
  13  11   0   -0.04    0.28
 -15 -11   0   -0.49    0.42
 -15 -11   0    0.14    0.40
 -15  11   0    0.18    0.64
 -17 -11   0    0.19    0.38
 -17  11   0   -0.35    0.64
 -19  11   0    0.28    0.79
   0 -12   0   10.19    1.03
   0 -12   0    8.12    0.89
   0 -12   0    8.92    0.96
   0  12   0    7.42    0.84
   0  12   0    6.67    0.84
   0  12   0    8.77    0.95
  -2 -12   0    1.75    0.53
  -2 -12   0    2.80    0.59
   2 -12   0    1.58    0.51
  -2 -12   0    1.28    0.50
   2 -12   0    2.10    0.54
   2 -12   0    1.68    0.56
   2 -12   0    1.35    0.51
   2  12   0    1.70    0.51
  -2  12   0    1.88    0.57
   2  12   0    1.99    0.51
  -2  12   0    1.30    0.49
   2  12   0    3.19    0.58
  -2  12   0    2.22    0.57
   4 -12   0    1.96    0.55
   4 -12   0    1.51    0.55
  -4 -12   0    2.89    0.64
  -4 -12   0    2.72    0.44
   4 -12   0    2.17    0.57
   4 -12   0    2.55    0.65
  -4 -12   0    1.13    0.48
  -4 -12   0    1.39    0.45
  -4  12   0    2.79    0.64
   4  12   0    3.09    0.57
   4  12   0    2.55    0.52
  -4  12   0    1.56    0.54
  -4  12   0    2.64    0.63
   6 -12   0    2.08    0.61
   6 -12   0    1.33    0.51
   6 -12   0    1.21    0.54
  -6 -12   0    0.84    0.45
  -6 -12   0    0.58    0.45
   6 -12   0    0.93    0.51
  -6  12   0    0.97    0.54
   6  12   0    0.99    0.45
  -6  12   0    0.77    0.47
   6  12   0    1.37    0.47
  -6  12   0    0.34    0.53
   8 -12   0    3.07    0.68
   8 -12   0    3.19    0.64
  -8 -12   0    2.31    0.55
  -8 -12   0    3.32    0.69
   8 -12   0    2.31    0.70
  -8  12   0    2.94    0.75
  -8  12   0    3.77    0.75
   8  12   0    2.68    0.53
 -10 -12   0    0.59    0.47
 -10 -12   0    0.82    0.51
  10 -12   0    1.31    0.59
 -10  12   0    1.29    0.65
  10  12   0    0.79    0.41
 -12 -12   0   -0.17    0.43
 -12 -12   0    1.10    0.49
 -12  12   0   -0.74    0.55
  12  12   0    0.39    0.36
 -14 -12   0    1.57    0.51
 -14 -12   0    1.19    0.62
 -14  12   0    0.83    0.72
  14  12   0    1.50    0.36
 -16 -12   0   -0.07    0.43
 -16  12   0    0.12    0.70
 -18 -12   0    1.20    0.46
 -18  12   0    0.37    0.77
   1 -13   0    0.10    0.42
  -1 -13   0    0.00    0.40
   1 -13   0   -0.17    0.40
   1 -13   0    0.03    0.43
  -1 -13   0    0.08    0.40
  -1 -13   0    0.06    0.40
  -1  13   0   -0.12    0.38
  -1  13   0   -0.37    0.42
  -1  13   0    0.10    0.44
   1  13   0    0.04    0.47
   1  13   0   -0.04    0.42
   3 -13   0    1.20    0.54
   3 -13   0    1.81    0.55
   3 -13   0    1.50    0.57
  -3 -13   0    0.68    0.50
  -3 -13   0    1.09    0.54
   3 -13   0    1.34    0.60
   3  13   0    1.55    0.49
  -3  13   0    1.07    0.57
  -3  13   0   -0.42    0.42
   3  13   0    1.17    0.52
  -3  13   0    1.02    0.55
  -5 -13   0    0.84    0.52
   5 -13   0    1.13    0.59
   5 -13   0    1.86    0.57
  -5 -13   0    1.90    0.58
   5 -13   0    1.70    0.63
   5 -13   0    1.86    0.60
  -5  13   0    1.67    0.58
  -5  13   0    2.10    0.69
  -5  13   0    1.90    0.65
   5  13   0    2.00    0.56
   7 -13   0    0.28    0.50
  -7 -13   0    0.43    0.48
   7 -13   0    0.51    0.55
  -7 -13   0    0.45    0.50
   7 -13   0   -0.05    0.45
  -7  13   0    0.16    0.50
  -7  13   0    0.73    0.62
   7  13   0    0.82    0.45
   9 -13   0    0.43    0.59
   9 -13   0   -0.02    0.46
  -9 -13   0   -0.16    0.46
  -9 -13   0    0.06    0.45
  -9  13   0   -0.11    0.52
   9  13   0    0.02    0.39
 -11 -13   0    1.32    0.60
 -11 -13   0   -0.02    0.50
 -11  13   0    1.01    0.69
  11  13   0    0.51    0.39
 -13 -13   0    0.12    0.48
 -13 -13   0    0.06    0.54
 -13  13   0    0.58    0.73
 -15 -13   0    0.17    0.49
 -15  13   0    0.03    0.71
 -17 -13   0   -0.86    0.45
 -17  13   0   -0.44    0.69
   0 -14   0    8.93    1.09
   0 -14   0    9.65    1.08
   0  14   0    9.96    1.13
   0  14   0   12.02    1.14
  -2 -14   0    1.29    0.58
   2 -14   0    0.67    0.51
   2 -14   0    1.20    0.58
   2 -14   0    0.45    0.56
  -2 -14   0    0.84    0.52
  -2  14   0    1.17    0.60
   2  14   0    1.14    0.54
   2  14   0    1.42    0.58
  -2  14   0    1.61    0.63
   4 -14   0   -0.10    0.55
   4 -14   0    0.15    0.49
  -4 -14   0   -0.04    0.47
   4 -14   0    0.25    0.54
  -4 -14   0   -0.85    0.41
   4  14   0    0.33    0.50
  -4  14   0    0.12    0.53
  -4  14   0    0.25    0.57
  -6 -14   0    1.75    0.61
   6 -14   0    1.27    0.62
   6 -14   0    0.07    0.54
  -6 -14   0    0.61    0.53
   6 -14   0   -0.13    0.45
  -6  14   0    1.26    0.64
   6  14   0    0.30    0.46
  -6  14   0    0.99    0.66
   8 -14   0    1.28    0.67
   8 -14   0    1.53    0.69
  -8 -14   0    1.53    0.60
  -8 -14   0    1.48    0.64
   8 -14   0    2.73    0.69
  -8  14   0    1.95    0.75
   8  14   0    1.77    0.54
  10 -14   0    0.68    0.65
 -10 -14   0   -0.25    0.50
 -10 -14   0    0.01    0.52
 -10  14   0   -0.10    0.61
  10  14   0   -0.06    0.40
 -12 -14   0   -0.14    0.49
 -12  14   0    0.31    0.72
 -14 -14   0    1.23    0.56
 -14  14   0    0.06    0.74
 -16 -14   0    0.66    0.54
 -16  14   0   -0.58    0.74
   1 -15   0    8.36    1.09
  -1 -15   0    5.87    0.92
  -1 -15   0    5.80    0.93
   1 -15   0    4.97    0.85
   1  15   0    3.95    0.81
  -1  15   0    5.01    0.88
   1  15   0    6.69    0.93
  -1  15   0    6.57    1.00
  -3 -15   0    0.09    0.52
   3 -15   0    0.26    0.57
  -3 -15   0   -0.24    0.51
   3 -15   0    0.55    0.53
  -3  15   0    0.59    0.57
   3  15   0    1.27    0.56
  -3  15   0    0.68    0.63
  -5 -15   0    1.66    0.63
   5 -15   0    0.84    0.64
  -5 -15   0    0.38    0.54
   5 -15   0   -0.19    0.47
   5 -15   0   -0.08    0.52
   5  15   0    0.35    0.51
  -5  15   0    1.54    0.67
  -5  15   0    0.89    0.66
   7 -15   0    2.76    0.80
   7 -15   0    1.40    0.66
   7 -15   0    1.02    0.63
  -7 -15   0    1.59    0.66
  -7  15   0    1.56    0.75
   7  15   0    1.61    0.57
  -9 -15   0    2.22    0.66
   9 -15   0    1.55    0.76
   9 -15   0    1.18    0.60
  -9  15   0    1.30    0.74
 -11 -15   0    0.56    0.59
 -11  15   0    0.71    0.75
 -13 -15   0    0.11    0.56
 -13  15   0   -0.63    0.74
 -15 -15   0    0.74    0.60
 -15  15   0    0.06    0.79
   0 -16   0    6.17    1.00
   0  16   0   10.52    1.24
  -2 -16   0   -1.04    0.51
   2 -16   0    0.70    0.66
   2  16   0    0.20    0.59
  -2  16   0    0.27    0.64
  -2  16   0   -0.64    0.50
  -4 -16   0    6.92    0.98
   4 -16   0    5.25    0.98
   4 -16   0    6.94    1.04
  -4  16   0    7.65    1.12
  -4  16   0    6.48    1.08
   4  16   0    7.90    1.05
  -6 -16   0    0.19    0.59
   6 -16   0   -1.10    0.44
   6 -16   0   -0.02    0.63
  -6  16   0    0.36    0.67
   6  16   0    0.63    0.55
   8 -16   0    4.00    0.85
  -8 -16   0    2.77    0.75
   8 -16   0    2.43    0.84
  -8  16   0    0.79    0.79
 -10 -16   0   -0.10    0.60
 -10  16   0    0.90    0.81
 -12 -16   0    0.90    0.65
 -12  16   0   -0.11    0.69
  -1 -17   0    3.17    0.84
   1 -17   0    1.57    0.76
  -1  17   0    3.79    0.90
   1  17   0    2.62    0.80
   3 -17   0    1.82    0.81
  -3 -17   0    3.26    0.87
  -3  17   0    3.58    0.91
   3  17   0    4.79    0.94
  -3  17   0    3.81    0.94
   5 -17   0    1.95    0.83
  -5 -17   0    4.38    0.88
  -5  17   0    2.42    0.88
   7 -17   0    0.91    0.76
  -7 -17   0    1.33    0.69
  -7  17   0    0.89    0.81
  -9 -17   0    0.25    0.67
  -9  17   0    0.36    0.81
 -11 -17   0    2.07    0.78
 -11  17   0   -0.88    0.77
   0 -18   0    2.06    0.83
   0  18   0    2.04    0.83
   2 -18   0   -0.90    0.62
  -2 -18   0   -0.39    0.67
  -2  18   0   -0.28    0.66
  -4 -18   0    4.67    0.99
   4 -18   0    3.87    0.95
  -4  18   0    3.77    1.00
  -6 -18   0   -0.09    0.64
   6 -18   0    0.84    0.78
  -6  18   0    0.28    0.78
  -8 -18   0    1.29    0.76
   8 -18   0    1.34    0.82
  -8  18   0    1.39    0.91
   1 -19   0    0.68    0.72
  -1 -19   0    0.82    0.78
  -3 -19   0    0.77    0.79
   3 -19   0    1.58    0.86
  -5 -19   0    1.86    0.85
   5 -19   0    3.04    1.00
   7 -19   0   -0.95    0.73
  -7 -19   0   -0.01    0.70
  -7  19   0   -0.16    0.83
 -22   0   1   -0.23    0.35
 -20   0   1    0.41    0.35
 -18   0   1    0.10    0.32
 -16   0   1   -0.06    0.27
 -14   0   1   -0.17    0.18
 -14   0   1   -0.26    0.21
 -14   0   1   -0.10    0.13
 -12   0   1    0.17    0.13
 -12   0   1   -0.01    0.13
  12   0  -1   -0.14    0.12
 -12   0   1   -0.06    0.18
 -12   0   1    0.23    0.17
 -10   0   1    0.07    0.13
 -10   0   1    0.06    0.11
  10   0  -1   -0.07    0.11
 -10   0   1   -0.10    0.12
 -10   0   1    0.01    0.14
  -8   0   1    0.11    0.12
  -8   0   1    0.01    0.11
  -8   0   1    0.10    0.11
   8   0  -1    0.02    0.11
   8   0  -1   -0.03    0.10
  -8   0   1   -0.03    0.10
   6   0  -1    0.02    0.09
  -6   0   1    0.07    0.09
   6   0  -1    0.06    0.10
  -6   0   1   -0.14    0.08
  -6   0   1    0.03    0.08
  -6   0   1    0.08    0.09
   4   0  -1   -0.12    0.05
  -4   0   1   -0.13    0.06
   4   0  -1   -0.05    0.05
  -4   0   1    0.12    0.07
  -4   0   1   -0.06    0.07
   4   0  -1    0.01    0.07
   4   0  -1    0.02    0.08
  -4   0   1   -0.01    0.07
   4   0  -1   -0.03    0.05
  -2   0   1   -0.67    0.09
  -2   0   1   -0.66    0.08
  -2   0   1   -0.73    0.08
   0   0   1   -0.44    0.03
   0   0   1   -0.49    0.03
   0   0   1   -0.50    0.02
   0   0  -1   -0.48    0.02
   0   0  -1   -0.48    0.02
   0   0  -1   -0.46    0.02
   0   0  -1   -0.53    0.02
   0   0   1   -0.52    0.02
   0   0   1   -0.48    0.02
  -2   0  -1   -0.21    0.08
  -2   0  -1   -0.37    0.07
  -2   0  -1   -0.35    0.09
   2   0   1   -0.40    0.02
   2   0   1    0.02    0.12
   2   0   1   -0.29    0.07
   2   0   1   -0.26    0.08
  -2   0  -1   -0.16    0.08
   4   0   1    0.08    0.08
   4   0   1    0.14    0.09
  -4   0  -1    0.02    0.09
  -4   0  -1   -0.10    0.10
  -4   0  -1    0.03    0.10
   4   0   1   -0.12    0.10
  -4   0  -1    0.03    0.14
  -6   0  -1    0.11    0.11
  -6   0  -1   -0.14    0.12
   6   0   1    0.00    0.12
  -6   0  -1    0.17    0.12
  -6   0  -1    0.15    0.20
  -8   0  -1    0.15    0.16
   8   0   1    0.01    0.15
  -8   0  -1    0.15    0.14
  -8   0  -1    0.03    0.14
  -8   0  -1    0.15    0.14
 -10   0  -1   -0.10    0.19
  10   0   1    0.12    0.17
 -10   0  -1    0.02    0.15
 -10   0  -1   -0.07    0.16
 -10   0  -1   -0.04    0.14
 -12   0  -1    0.04    0.19
  12   0   1   -0.11    0.17
  12   0   1   -0.11    0.17
 -12   0  -1   -0.20    0.16
 -12   0  -1    0.13    0.23
 -14   0  -1    0.29    0.18
 -14   0  -1    0.35    0.28
  14   0   1   -0.13    0.17
  14   0   1    0.01    0.17
 -16   0  -1   -0.26    0.30
 -18   0  -1    0.01    0.34
 -20   0  -1    0.33    0.38
 -22   0  -1    0.08    0.43
 -23   1   1   -0.29    0.41
 -21  -1   1    0.41    0.31
 -21   1   1   -0.28    0.40
 -19  -1   1    0.84    0.31
 -19   1   1   -0.50    0.35
 -17  -1   1    0.39    0.26
 -17   1   1    1.05    0.37
  15  -1  -1    0.70    0.21
 -15  -1   1    0.89    0.24
 -15  -1   1    0.87    0.23
 -15   1   1    0.77    0.22
 -15   1   1    0.97    0.33
  13  -1  -1    0.81    0.22
 -13  -1   1    1.17    0.22
 -13  -1   1    1.14    0.20
 -13   1   1    0.59    0.21
 -13   1   1    0.89    0.24
 -13   1   1    0.97    0.29
 -11  -1   1   -0.13    0.12
 -11  -1   1   -0.02    0.12
  11  -1  -1    0.14    0.17
 -11  -1   1    0.07    0.11
 -11   1   1   -0.03    0.18
 -11   1   1    0.04    0.16
 -11   1   1    0.44    0.19
 -11   1   1   -0.08    0.16
  -9  -1   1   14.70    0.50
   9  -1  -1   14.67    0.65
   9  -1  -1   13.70    0.65
  -9  -1   1   14.29    0.57
  -9   1   1   13.98    0.64
  -9   1   1   14.15    0.63
  -9   1   1   14.35    0.65
  -9   1   1   14.72    0.65
   7  -1  -1   44.26    1.56
  -7  -1   1   45.58    1.52
   7  -1  -1   43.87    1.56
   7  -1  -1   45.49    1.42
  -7   1   1   44.40    1.56
  -7   1   1   44.40    1.49
  -7   1   1   46.05    1.49
  -7   1   1   45.10    1.57
  -5  -1   1  110.67    3.43
   5  -1  -1  112.74    3.37
  -5  -1   1  112.86    3.56
  -5  -1   1  108.47    3.43
   5  -1  -1  112.13    3.55
   5  -1  -1  107.36    3.54
  -5   1   1  114.22    3.55
  -5   1   1  105.79    3.39
   5   1  -1  106.47    3.43
  -5   1   1  112.10    3.40
  -5   1   1  111.27    3.55
  -3  -1   1    0.92    0.09
  -3  -1   1    0.93    0.12
  -3  -1   1    0.86    0.11
   3  -1  -1    0.67    0.11
   3  -1  -1    0.33    0.08
   3  -1  -1    0.77    0.11
  -3  -1   1    0.93    0.08
  -3  -1   1    0.93    0.08
   3  -1  -1    0.74    0.13
  -3   1   1    0.65    0.12
   3   1  -1    0.83    0.06
  -3   1   1    0.93    0.13
  -3   1   1    0.78    0.12
  -3   1   1    0.74    0.12
   3   1  -1    1.09    0.07
   3   1  -1    0.86    0.12
   3   1  -1    0.89    0.09
   1  -1  -1   14.42    0.51
  -1  -1   1   15.19    0.51
  -1  -1   1   14.61    0.53
   1  -1  -1   15.00    0.54
  -1  -1   1   13.71    0.50
   1   1  -1   13.33    0.49
  -1   1   1   14.37    0.51
  -1   1   1   14.12    0.54
  -1  -1  -1   32.66    1.10
   1  -1   1   32.50    1.12
   1  -1   1   32.52    1.16
  -1  -1  -1   32.03    1.05
  -1  -1  -1   32.23    1.05
   1  -1   1   32.68    1.06
   1  -1   1   34.27    1.08
  -1  -1  -1   32.23    1.02
  -1  -1  -1   33.56    1.10
   1   1   1   32.28    1.19
   1   1   1   33.29    1.10
  -1   1  -1   32.25    1.12
  -1   1  -1   31.75    1.07
  -1   1  -1   32.52    1.07
   1   1   1   31.44    1.05
   1   1   1   33.39    1.02
  -1   1  -1   34.39    1.16
  -3  -1  -1   42.55    1.38
  -3  -1  -1   43.36    1.45
  -3  -1  -1   43.29    1.39
  -3  -1  -1   45.25    1.38
   3  -1   1   44.60    1.51
  -3  -1  -1   45.03    1.64
   3  -1   1   36.50    1.40
   3  -1   1   44.47    1.44
   3   1   1   45.99    1.46
  -3   1  -1   43.19    1.45
  -3   1  -1   44.94    1.43
   3   1   1   44.43    1.37
   3   1   1   45.12    1.45
  -3   1  -1   45.27    1.51
   3   1   1   45.07    1.37
  -3   1  -1   45.05    1.61
  -5  -1  -1    4.64    0.26
  -5  -1  -1    4.29    0.24
   5  -1   1    4.17    0.26
  -5  -1  -1    4.27    0.25
   5  -1   1    4.24    0.32
  -5  -1  -1    4.85    0.45
  -5   1  -1    4.04    0.32
  -5   1  -1    3.97    0.41
   5   1   1    4.13    0.26
   5   1   1    3.99    0.25
  -5   1  -1    4.50    0.30
  -5   1  -1    3.84    0.32
  -7  -1  -1    0.59    0.14
   7  -1   1    0.31    0.18
  -7  -1  -1    0.78    0.16
  -7  -1  -1    0.49    0.13
   7  -1   1    0.63    0.13
  -7  -1  -1    0.77    0.28
   7   1   1    0.32    0.14
  -7   1  -1    0.66    0.18
  -7   1  -1    0.18    0.16
  -7   1  -1    0.42    0.19
   7   1   1    0.39    0.13
  -7   1  -1    0.36    0.24
  -7   1  -1    0.80    0.18
  -9  -1  -1    8.98    0.43
  -9  -1  -1    8.23    0.42
   9  -1   1    8.33    0.53
  -9  -1  -1    8.64    0.43
  -9  -1  -1    7.98    0.43
   9   1   1    8.32    0.42
  -9   1  -1    8.31    0.49
  -9   1  -1    8.97    0.53
  -9   1  -1    8.36    0.52
  -9   1  -1    9.36    0.51
   9   1   1    8.10    0.41
 -11  -1  -1    5.23    0.35
 -11  -1  -1    5.45    0.37
  11  -1   1    5.54    0.47
 -11  -1  -1    4.99    0.39
 -11  -1  -1    5.37    0.34
 -11   1  -1    5.07    0.47
  11   1   1    5.22    0.33
  11   1   1    4.89    0.31
 -11   1  -1    6.29    0.47
 -11   1  -1    5.75    0.45
 -13  -1  -1    0.63    0.25
  13  -1   1    0.46    0.25
 -13  -1  -1    0.31    0.15
 -13  -1  -1    0.41    0.20
 -13   1  -1    0.65    0.31
 -13   1  -1    0.52    0.25
 -13   1  -1    0.43    0.24
 -15  -1  -1    0.13    0.27
  15  -1   1    0.12    0.23
 -15   1  -1    1.23    0.36
 -15   1  -1    0.17    0.22
  17  -1   1   -0.15    0.20
  17  -1   1    0.06    0.20
 -17  -1  -1   -0.09    0.30
 -17   1  -1    0.31    0.38
 -19  -1  -1    0.26    0.35
 -19   1  -1   -0.17    0.38
 -21  -1  -1    0.37    0.37
 -21   1  -1   -0.26    0.40
 -22   2   1    0.11    0.49
 -20   2   1    0.19    0.44
  18  -2  -1    1.88    0.30
 -18   2   1    1.15    0.45
  16  -2  -1    2.66    0.35
 -16  -2   1    2.66    0.26
 -16   2   1    2.44    0.46
 -16   2   1    2.40    0.35
  14  -2  -1    0.24    0.23
 -14  -2   1    0.40    0.17
 -14   2   1    0.31    0.24
 -14   2   1    0.13    0.24
 -14   2   1    0.82    0.34
 -12  -2   1    0.25    0.16
  12  -2  -1   -0.03    0.20
 -12   2   1    0.15    0.22
 -12   2   1   -0.04    0.22
 -12   2   1    0.08    0.24
  10  -2  -1   38.24    1.49
  10  -2  -1   38.61    1.50
 -10  -2   1   39.72    1.44
  10  -2  -1   40.75    1.30
 -10   2   1   40.64    1.45
 -10   2   1   37.77    1.45
 -10   2   1   39.56    1.49
 -10   2   1   39.45    1.50
  -8  -2   1   23.36    0.91
   8  -2  -1   23.02    0.97
   8  -2  -1   22.73    0.85
   8  -2  -1   23.82    0.98
  -8   2   1   23.03    0.93
  -8   2   1   22.49    0.97
  -8   2   1   24.11    0.93
  -8   2   1   22.80    0.96
  -6  -2   1   15.43    0.64
   6  -2  -1   15.33    0.68
  -6  -2   1   13.94    0.55
   6  -2  -1   14.66    0.68
   6  -2  -1   15.05    0.54
  -6   2   1   15.30    0.65
  -6   2   1   14.38    0.64
  -6   2   1   14.34    0.68
  -6   2   1   15.12    0.69
  -4  -2   1   16.10    0.55
  -4  -2   1   16.42    0.58
   4  -2  -1   16.21    0.69
  -4  -2   1   16.22    0.67
  -4  -2   1   16.31    0.57
   4  -2  -1   15.94    0.65
  -4  -2   1   16.04    0.55
   4   2  -1   16.12    0.58
   4   2  -1   15.72    0.57
  -4   2   1   15.29    0.69
  -4   2   1   15.87    0.69
  -4   2   1   17.64    0.67
   4   2  -1   15.96    0.58
  -4   2   1   15.56    0.65
   2  -2  -1    4.27    0.29
  -2  -2   1    4.50    0.24
  -2  -2   1    4.79    0.25
  -2  -2   1    4.42    0.23
   2  -2  -1    3.94    0.28
   2  -2  -1    4.15    0.27
  -2  -2   1    4.32    0.28
   2  -2  -1    4.65    0.27
  -2  -2   1    4.29    0.25
   2   2  -1    4.62    0.25
  -2   2   1    4.92    0.30
  -2   2   1    4.43    0.29
   2   2  -1    4.23    0.24
  -2   2   1    4.03    0.28
   2   2  -1    3.97    0.28
   2   2  -1    4.62    0.24
  -2   2   1    4.57    0.28
   0  -2  -1    4.93    0.28
   0  -2  -1    5.07    0.29
   0  -2  -1    4.80    0.28
   0  -2   1    4.71    0.27
   0  -2   1    4.45    0.29
   0  -2   1    5.00    0.30
   0  -2   1    5.18    0.29
   0   2  -1    5.32    0.30
   0   2  -1    4.80    0.29
   0   2   1    5.16    0.29
   0   2  -1    5.30    0.30
   0   2   1    5.02    0.27
   0   2   1    5.46    0.28
   0   2  -1    5.08    0.28
   2  -2   1    2.14    0.21
   2  -2   1    1.83    0.22
  -2  -2  -1    1.63    0.17
   2  -2   1    1.92    0.20
  -2  -2  -1    2.24    0.25
  -2  -2  -1    2.40    0.20
   2  -2   1    2.27    0.23
  -2  -2  -1    1.88    0.18
   2   2   1    2.18    0.25
   2   2   1    2.45    0.18
   2   2   1    1.98    0.19
  -2   2  -1    2.18    0.22
  -2   2  -1    1.68    0.22
   2   2   1    2.14    0.14
  -2   2  -1    2.10    0.23
   2   2   1    2.12    0.19
  -2   2  -1    1.85    0.19
  -4  -2  -1  278.74    8.38
  -4  -2  -1  280.10    8.72
  -4  -2  -1  286.12    8.26
  -4  -2  -1  285.28    8.73
  -4  -2  -1  283.56    9.27
   4  -2   1  279.34    8.46
  -4  -2  -1  279.05    8.38
  -4   2  -1  278.82    8.84
   4   2   1  282.79    8.73
  -4   2  -1  280.46    8.47
  -4   2  -1  271.54    8.83
  -4   2  -1  277.99    8.50
  -4   2  -1  278.05    9.20
   4   2   1  284.99    8.33
   4   2   1  272.89    8.72
  -6  -2  -1    3.62    0.24
  -6  -2  -1    3.92    0.23
   6  -2   1    3.75    0.36
  -6  -2  -1    3.43    0.24
  -6  -2  -1    4.17    0.46
  -6   2  -1    4.13    0.34
  -6   2  -1    4.05    0.37
   6   2   1    3.65    0.24
  -6   2  -1    3.57    0.36
   6   2   1    3.73    0.24
  -6   2  -1    3.16    0.34
  -6   2  -1    3.68    0.41
   8  -2   1   18.15    0.86
   8  -2   1   17.88    0.73
  -8  -2  -1   17.91    0.66
  -8  -2  -1   17.45    0.67
  -8  -2  -1   18.65    0.67
  -8   2  -1   16.35    0.82
  -8   2  -1   19.70    1.04
  -8   2  -1   18.87    0.81
   8   2   1   18.12    0.67
   8   2   1   17.81    0.67
  -8   2  -1   20.97    0.89
  -8   2  -1   18.16    0.84
 -10  -2  -1    0.14    0.14
 -10  -2  -1    0.06    0.11
  10  -2   1   -0.04    0.21
 -10  -2  -1    0.13    0.16
 -10  -2  -1    0.03    0.10
  10  -2   1    0.04    0.14
 -10   2  -1   -0.08    0.19
 -10   2  -1   -0.17    0.23
 -10   2  -1   -0.05    0.18
 -10   2  -1    0.24    0.21
  12  -2   1   26.01    1.17
 -12  -2  -1   25.77    0.98
 -12  -2  -1   27.14    0.97
 -12   2  -1   27.13    1.14
 -12   2  -1   25.48    1.18
 -12   2  -1   26.64    1.00
 -12   2  -1   25.83    1.12
 -14  -2  -1    4.06    0.37
 -14  -2  -1    4.21    0.37
  14  -2   1    4.28    0.48
 -14   2  -1    4.16    0.47
 -14   2  -1    4.40    0.55
  16  -2   1   -0.03    0.27
 -16  -2  -1   -0.15    0.25
 -16   2  -1    0.46    0.39
  18  -2   1   -0.20    0.24
  18  -2   1    0.05    0.25
 -18  -2  -1   -0.29    0.28
 -18   2  -1   -0.21    0.40
 -20  -2  -1    0.75    0.34
 -20   2  -1    0.73    0.49
 -22   2  -1    0.34    0.51
 -23   3   1    0.41    0.55
 -21   3   1    0.49    0.49
 -19   3   1    0.26    0.46
  17  -3  -1    2.30    0.40
 -17   3   1    2.28    0.54
  15  -3  -1    1.84    0.37
 -15  -3   1    1.92    0.29
 -15  -3   1    2.08    0.33
 -15   3   1    2.70    0.42
 -15   3   1    2.35    0.46
  13  -3  -1    7.26    0.60
 -13  -3   1    6.11    0.46
 -13  -3   1    6.74    0.45
 -13   3   1    5.82    0.56
 -13   3   1    7.43    0.66
 -13   3   1    6.98    0.59
  11  -3  -1    1.04    0.22
  11  -3  -1    0.45    0.26
  11  -3  -1    0.78    0.27
 -11  -3   1    1.06    0.24
 -11  -3   1    0.97    0.20
 -11   3   1    0.98    0.28
 -11   3   1    0.66    0.30
 -11   3   1    1.14    0.27
 -11   3   1    1.07    0.28
  -9  -3   1   42.44    1.40
  -9  -3   1   43.34    1.62
   9  -3  -1   36.57    1.47
   9  -3  -1   42.24    1.66
   9  -3  -1   44.96    1.67
  -9   3   1   44.72    1.61
  -9   3   1   46.50    1.69
  -9   3   1   45.58    1.60
  -9   3   1   43.65    1.65
   7  -3  -1    9.94    0.44
  -7  -3   1    9.62    0.55
   7  -3  -1   10.59    0.61
   7  -3  -1    9.95    0.52
  -7  -3   1    9.24    0.36
  -7  -3   1    9.47    0.40
   7  -3  -1   10.08    0.59
  -7   3   1    9.60    0.56
  -7   3   1   10.70    0.60
  -7   3   1    9.29    0.57
  -7   3   1    9.41    0.55
  -5  -3   1   18.78    0.67
   5  -3  -1   16.80    0.75
   5  -3  -1   17.91    0.82
  -5  -3   1   17.39    0.63
  -5  -3   1   17.66    0.62
   5  -3  -1   17.82    0.72
  -5  -3   1   17.82    0.63
  -5  -3   1   17.67    0.79
   5   3  -1   17.66    0.67
   5   3  -1   17.89    0.66
  -5   3   1   15.60    0.78
  -5   3   1   16.36    0.80
  -5   3   1   18.04    0.78
  -5   3   1   17.92    0.77
   5   3  -1   18.08    0.62
   3  -3  -1    2.14    0.28
   3  -3  -1    3.19    0.32
  -3  -3   1    3.00    0.24
   3  -3  -1    2.67    0.28
  -3  -3   1    2.56    0.28
  -3  -3   1    2.80    0.25
  -3  -3   1    2.52    0.23
  -3   3   1    3.31    0.31
   3   3  -1    2.95    0.26
  -3   3   1    2.40    0.29
  -3   3   1    2.47    0.29
  -3   3   1    3.31    0.30
   3   3  -1    3.01    0.26
   3   3  -1    3.07    0.23
  -1  -3   1   28.82    1.12
  -1  -3   1   27.51    1.03
  -1  -3   1   28.58    1.04
   1  -3  -1   27.85    1.04
   1  -3  -1   29.64    1.11
   1  -3  -1   28.82    1.05
  -1  -3   1   28.32    1.08
   1  -3  -1   31.03    1.12
   1   3  -1   27.21    1.08
   1   3  -1   29.04    1.03
  -1   3   1   29.76    1.11
  -1   3   1   30.40    1.11
  -1   3   1   29.22    1.06
  -1   3   1   29.35    1.06
   1   3  -1   27.84    1.08
   1   3  -1   30.03    1.04
  -1  -3  -1    4.74    0.31
  -1  -3  -1    4.51    0.34
  -1  -3  -1    4.71    0.33
   1  -3   1    4.99    0.35
   1  -3   1    4.62    0.34
   1  -3   1    5.01    0.24
   1  -3   1    5.71    0.39
  -1  -3  -1    4.97    0.34
  -1  -3  -1    5.49    0.32
   1  -3   1    5.07    0.36
   1   3   1    4.69    0.33
   1   3   1    4.81    0.33
  -1   3  -1    5.29    0.37
  -1   3  -1    4.83    0.35
  -1   3  -1    5.33    0.38
  -1   3  -1    4.78    0.36
   1   3   1    4.46    0.31
  -1   3  -1    5.07    0.35
  -3  -3  -1   98.46    3.11
  -3  -3  -1   94.59    3.10
  -3  -3  -1  103.59    3.49
   3  -3   1  101.97    3.37
  -3  -3  -1  102.11    3.25
   3  -3   1  100.61    3.19
  -3  -3  -1   99.59    3.24
  -3   3  -1   99.09    3.22
   3   3   1   99.59    3.09
  -3   3  -1  101.03    3.18
   3   3   1  100.32    2.99
  -3   3  -1  100.18    3.37
  -3   3  -1  103.79    3.36
   3   3   1   98.02    3.25
   3   3   1  100.25    3.24
  -3   3  -1  102.88    3.34
  -3   3  -1   98.63    3.34
  -5  -3  -1    1.55    0.19
  -5  -3  -1    1.37    0.17
   5  -3   1    1.64    0.24
  -5  -3  -1    1.45    0.30
  -5  -3  -1    1.53    0.18
  -5  -3  -1    1.45    0.18
   5   3   1    1.48    0.18
  -5   3  -1    1.91    0.29
  -5   3  -1    1.36    0.25
  -5   3  -1    1.53    0.27
  -5   3  -1    0.65    0.21
  -5   3  -1    1.47    0.24
   5   3   1    1.64    0.20
  -5   3  -1    1.55    0.22
  -7  -3  -1   42.35    1.39
   7  -3   1   43.66    1.50
  -7  -3  -1   41.99    1.43
   7  -3   1   41.32    1.65
  -7  -3  -1   41.80    1.38
  -7   3  -1   44.09    1.64
   7   3   1   43.41    1.44
  -7   3  -1   41.43    1.62
  -7   3  -1   42.20    1.54
  -7   3  -1   44.10    1.75
   7   3   1   42.56    1.42
  -7   3  -1   39.74    1.59
  -7   3  -1   42.52    1.54
  -9  -3  -1    1.60    0.16
   9  -3   1    1.35    0.31
  -9  -3  -1    1.58    0.18
   9  -3   1    1.71    0.26
  -9  -3  -1    1.67    0.19
  -9  -3  -1    1.13    0.18
  -9   3  -1    1.72    0.36
  -9   3  -1    1.28    0.29
  -9   3  -1    1.77    0.32
  -9   3  -1    1.44    0.23
  -9   3  -1    1.11    0.29
 -11  -3  -1   16.32    0.67
  11  -3   1   17.50    0.73
  11  -3   1   16.91    0.92
 -11  -3  -1   15.96    0.67
 -11  -3  -1   16.92    0.66
 -11   3  -1   19.60    0.96
 -11   3  -1   16.47    0.87
 -11   3  -1   17.07    0.74
 -11   3  -1   16.93    0.87
 -13  -3  -1    0.43    0.19
 -13  -3  -1    0.47    0.21
  13  -3   1    0.22    0.30
 -13   3  -1   -0.19    0.34
 -13   3  -1    0.45    0.18
 -13   3  -1    0.63    0.29
 -15  -3  -1    0.41    0.24
  15  -3   1    0.05    0.31
 -15   3  -1    0.49    0.41
 -17  -3  -1   -0.50    0.23
 -17   3  -1   -0.21    0.43
 -19  -3  -1    0.57    0.28
 -19   3  -1    1.24    0.53
 -21   3  -1    0.57    0.54
 -22   4   1   -0.64    0.49
 -20   4   1   -0.26    0.51
 -18   4   1    1.16    0.52
  16  -4  -1    0.23    0.32
 -16   4   1    0.94    0.43
 -14  -4   1    0.38    0.24
 -14  -4   1    0.21    0.18
  14  -4  -1    0.29    0.31
 -14   4   1   -0.23    0.36
 -14   4   1    0.25    0.30
  12  -4  -1    9.51    0.54
  12  -4  -1    8.07    0.69
 -12  -4   1    8.24    0.57
 -12  -4   1    8.42    0.41
 -12   4   1    7.75    0.68
 -12   4   1    8.18    0.67
 -12   4   1    8.93    0.75
  10  -4  -1    0.86    0.31
 -10  -4   1    0.90    0.15
 -10  -4   1    0.73    0.26
  10  -4  -1    0.89    0.28
 -10   4   1    0.86    0.29
 -10   4   1    1.17    0.32
 -10   4   1    0.89    0.28
 -10   4   1    0.91    0.30
  -8  -4   1   31.57    1.03
   8  -4  -1   31.59    1.20
  -8  -4   1   31.17    1.03
   8  -4  -1   30.28    1.14
   8  -4  -1   31.61    1.34
  -8  -4   1   30.03    1.28
  -8  -4   1   31.17    1.00
   8  -4  -1   31.67    1.33
  -8  -4   1   31.32    1.05
   8   4  -1   29.78    1.03
  -8   4   1   30.50    1.33
   8   4  -1   29.42    1.03
  -8   4   1   30.47    1.28
  -8   4   1   31.05    1.26
  -8   4   1   30.12    1.31
   6  -4  -1   28.67    1.15
   6  -4  -1   27.94    1.12
  -6  -4   1   30.40    1.02
  -6  -4   1   29.29    1.01
   6  -4  -1   30.19    1.26
  -6  -4   1   29.24    1.06
  -6  -4   1   26.85    1.19
  -6   4   1   31.44    1.18
   6   4  -1   30.84    1.06
  -6   4   1   26.04    1.16
   6   4  -1   29.04    0.95
   6   4  -1   28.00    1.06
  -6   4   1   29.65    1.23
  -6   4   1   28.24    1.22
   4  -4  -1   99.91    3.38
   4  -4  -1  100.46    3.21
  -4  -4   1   97.15    3.10
  -4  -4   1   98.89    3.10
   4  -4  -1   99.63    3.37
  -4  -4   1   98.19    3.39
  -4  -4   1   94.38    3.23
   4   4  -1   99.99    3.07
   4   4  -1   98.63    3.24
   4   4  -1  101.21    3.24
  -4   4   1   96.37    3.36
  -4   4   1   96.58    3.22
   4   4  -1  101.91    3.03
  -4   4   1   98.48    3.36
  -2  -4   1   10.60    0.53
   2  -4  -1   10.52    0.59
  -2  -4   1   12.04    0.55
  -2  -4   1   10.18    0.54
   2  -4  -1   10.44    0.57
   2  -4  -1   11.24    0.61
  -2  -4   1   10.58    0.60
  -2  -4   1   10.16    0.55
  -2   4   1   10.17    0.58
   2   4  -1   10.56    0.55
  -2   4   1   10.33    0.59
   2   4  -1   10.55    0.52
   0  -4  -1  263.15    8.43
   0  -4   1  273.08    8.11
   0  -4  -1  255.17    8.08
   0  -4   1  256.80    8.09
   0  -4  -1  265.20    8.09
   0  -4   1  259.73    8.58
   0  -4  -1  275.94    8.44
   0  -4   1  264.31    8.45
   0  -4   1  267.25    8.45
   0   4   1  263.24    8.44
   0   4  -1  267.90    8.45
   0   4  -1  261.70    8.44
   0   4  -1  276.15    8.59
   0   4   1  265.09    8.09
   0   4   1  271.58    8.66
   0   4   1  270.18    8.43
   0   4  -1  257.26    8.10
   2  -4   1   39.40    1.50
  -2  -4  -1   40.04    1.39
   2  -4   1   39.63    1.53
  -2  -4  -1   39.50    1.51
  -2  -4  -1   39.66    1.45
  -2  -4  -1   39.77    1.38
  -2  -4  -1   38.70    1.45
   2  -4   1   39.57    1.53
   2  -4   1   39.45    1.43
   2   4   1   40.48    1.45
  -2   4  -1   38.92    1.52
  -2   4  -1   40.22    1.53
   2   4   1   39.42    1.37
   2   4   1   43.00    1.48
  -2   4  -1   40.00    1.51
  -2   4  -1   38.38    1.46
   4  -4   1   86.25    3.06
  -4  -4  -1   92.75    2.92
  -4  -4  -1   89.64    3.16
   4  -4   1   86.48    2.88
  -4  -4  -1   86.02    2.79
  -4  -4  -1   90.67    2.91
  -4  -4  -1   85.62    2.78
  -4   4  -1   86.94    3.04
   4   4   1   88.06    2.91
   4   4   1   90.95    2.76
   4   4   1   85.02    2.92
  -4   4  -1   86.47    3.04
  -4   4  -1   89.01    2.94
  -4   4  -1   87.49    3.01
  -4   4  -1   87.43    3.01
  -6  -4  -1   14.39    0.62
   6  -4   1   15.39    0.74
  -6  -4  -1   14.56    0.62
  -6  -4  -1   14.72    0.86
  -6  -4  -1   14.82    0.64
  -6  -4  -1   13.68    0.60
  -6   4  -1   13.44    0.78
   6   4   1   14.60    0.64
  -6   4  -1   14.69    0.80
   6   4   1   14.77    0.63
  -6   4  -1   14.78    0.79
  -6   4  -1   15.25    0.72
  -6   4  -1   14.85    0.75
  -6   4  -1   15.46    0.77
  -8  -4  -1   24.28    0.88
   8  -4   1   23.33    1.00
  -8  -4  -1   22.46    0.85
  -8  -4  -1   23.97    0.86
   8  -4   1   22.22    1.11
  -8  -4  -1   22.09    0.88
  -8   4  -1   23.56    1.12
  -8   4  -1   23.56    1.10
  -8   4  -1   25.91    1.07
   8   4   1   23.54    0.86
   8   4   1   22.91    0.87
  -8   4  -1   24.78    1.18
  -8   4  -1   24.27    0.99
  -8   4  -1   22.80    1.10
 -10  -4  -1    3.19    0.28
 -10  -4  -1    3.22    0.29
  10  -4   1    3.32    0.47
 -10   4  -1    3.77    0.47
 -10   4  -1    3.99    0.52
 -10   4  -1    4.14    0.47
 -10   4  -1    3.77    0.36
  12  -4   1    0.69    0.35
 -12  -4  -1    0.27    0.19
 -12  -4  -1   -0.10    0.16
 -12   4  -1    0.22    0.30
 -12   4  -1    0.52    0.36
 -12   4  -1    0.05    0.18
 -14  -4  -1    2.21    0.28
 -14  -4  -1    2.12    0.27
  14  -4   1    2.19    0.46
 -14   4  -1    1.79    0.50
 -16  -4  -1    0.34    0.24
 -16   4  -1    0.57    0.48
 -18   4  -1   -0.27    0.49
 -20   4  -1    0.18    0.55
 -21   5   1    0.40    0.60
 -19   5   1    1.82    0.64
 -17   5   1   -0.07    0.47
 -15  -5   1   -0.13    0.24
  15  -5  -1   -0.18    0.31
 -15   5   1   -0.70    0.36
  13  -5  -1   23.24    1.20
 -13  -5   1   20.75    1.08
 -13   5   1   24.00    1.19
 -13   5   1   22.81    1.24
 -11  -5   1    5.48    0.34
  11  -5  -1    6.06    0.52
 -11  -5   1    4.57    0.51
  11  -5  -1    4.64    0.55
 -11  -5   1    5.16    0.34
  11  -5  -1    6.84    0.67
 -11   5   1    5.47    0.57
 -11   5   1    4.46    0.56
 -11   5   1    5.23    0.62
   9  -5  -1   23.14    0.95
  -9  -5   1   23.10    0.85
  -9  -5   1   22.90    0.85
   9  -5  -1   22.53    1.02
   9  -5  -1   24.33    1.15
   9  -5  -1   19.80    1.09
  -9  -5   1   20.71    1.07
  -9  -5   1   21.69    0.82
   9   5  -1   23.56    0.82
   9   5  -1   22.33    0.81
  -9   5   1   23.07    1.15
  -9   5   1   22.72    1.14
  -9   5   1   22.29    1.12
  -7  -5   1    7.98    0.44
   7  -5  -1    7.65    0.66
   7  -5  -1    8.69    0.70
   7  -5  -1    7.78    0.49
   7  -5  -1    8.49    0.58
  -7  -5   1    7.66    0.44
  -7  -5   1    7.20    0.61
  -7  -5   1    7.13    0.43
   7   5  -1    7.29    0.42
  -7   5   1    8.97    0.70
  -7   5   1    7.31    0.64
  -7   5   1    7.58    0.63
   7   5  -1    7.10    0.44
   5  -5  -1   71.12    2.54
  -5  -5   1   74.05    2.39
  -5  -5   1   67.67    2.27
   5  -5  -1   69.79    2.46
  -5  -5   1   64.36    2.51
   5  -5  -1   70.00    2.54
  -5  -5   1   69.61    2.28
   5  -5  -1   67.09    2.39
  -5   5   1   66.30    2.51
   5   5  -1   69.21    2.17
   5   5  -1   69.77    2.38
   5   5  -1   67.04    2.36
  -5   5   1   70.90    2.53
  -5   5   1   68.33    2.42
   5   5  -1   70.65    2.22
  -3  -5   1    3.42    0.36
   3  -5  -1    3.94    0.40
  -3  -5   1    4.39    0.40
  -3  -5   1    3.63    0.35
  -3  -5   1    3.28    0.40
  -3  -5   1    3.11    0.34
   3  -5  -1    3.50    0.41
   3  -5  -1    3.62    0.42
  -3   5   1    3.21    0.39
  -3   5   1    3.63    0.41
   3   5  -1    3.92    0.34
   3   5  -1    3.44    0.37
  -3   5   1    2.86    0.39
   3   5  -1    3.27    0.34
   1  -5  -1   36.52    1.49
  -1  -5   1   36.67    1.40
  -1  -5   1   38.86    1.49
  -1  -5   1   38.63    1.48
  -1  -5   1   39.37    1.53
  -1  -5   1   36.50    1.39
   1  -5  -1   39.35    1.51
   1  -5  -1   37.05    1.42
  -1   5   1   36.89    1.42
   1   5  -1   38.81    1.48
   1   5  -1   38.40    1.49
  -1   5   1   38.94    1.35
  -1   5   1   37.44    1.49
   1   5  -1   36.89    1.40
  -1  -5  -1    6.22    0.45
   1  -5   1    6.53    0.48
  -1  -5  -1    5.43    0.47
   1  -5   1    6.24    0.53
  -1  -5  -1    7.27    0.43
   1  -5   1    5.30    0.47
   1  -5   1    5.23    0.50
  -1  -5  -1    6.07    0.45
  -1  -5  -1    5.75    0.43
   1   5   1    6.68    0.47
  -1   5  -1    5.93    0.53
   1   5   1    5.18    0.47
  -1   5  -1    5.12    0.49
  -1   5  -1    5.65    0.49
  -1   5  -1    7.27    0.50
   1   5   1    5.75    0.41
   1   5   1    5.76    0.46
   3  -5   1  114.31    3.86
   3  -5   1  111.58    3.85
  -3  -5  -1  110.04    3.57
  -3  -5  -1  109.17    3.72
   3  -5   1  111.52    3.83
  -3  -5  -1  110.28    3.56
   3  -5   1  110.12    3.64
  -3  -5  -1  110.12    3.72
  -3  -5  -1  112.89    3.90
  -3   5  -1  112.47    3.85
  -3   5  -1  115.13    3.84
  -3   5  -1  112.26    3.70
  -3   5  -1  111.29    3.84
   3   5   1  119.78    3.76
   3   5   1  109.89    3.72
   3   5   1  111.70    3.55
  -3   5  -1  113.73    3.71
   5  -5   1   14.31    0.82
   5  -5   1   15.28    0.77
  -5  -5  -1   14.85    0.85
  -5  -5  -1   14.94    0.67
  -5  -5  -1   14.73    0.66
  -5  -5  -1   13.70    0.66
  -5  -5  -1   14.06    0.69
  -5   5  -1   15.43    0.77
   5   5   1   12.98    0.68
  -5   5  -1   12.61    0.77
  -5   5  -1   14.94    0.83
   5   5   1   13.69    0.68
  -5   5  -1   14.76    0.82
   5   5   1   13.95    0.60
  -5   5  -1   15.38    0.70
  -7  -5  -1   55.07    1.81
   7  -5   1   55.02    1.95
  -7  -5  -1   54.35    1.81
  -7  -5  -1   54.64    1.86
  -7  -5  -1   51.98    1.87
   7   5   1   53.16    1.85
  -7   5  -1   52.73    2.04
  -7   5  -1   52.51    2.10
  -7   5  -1   54.24    2.06
  -7   5  -1   52.05    2.08
   7   5   1   51.96    1.88
  -7   5  -1   55.78    2.01
  -9  -5  -1   10.40    0.52
  -9  -5  -1   10.44    0.53
  -9  -5  -1   10.54    0.52
   9  -5   1   10.16    0.75
  -9  -5  -1   10.39    0.50
   9  -5   1   10.93    0.65
  -9   5  -1   10.78    0.75
  -9   5  -1   12.28    0.83
   9   5   1   10.32    0.49
  -9   5  -1   11.11    0.76
  -9   5  -1   10.58    0.63
  -9   5  -1   10.20    0.73
   9   5   1    9.71    0.50
 -11  -5  -1    1.77    0.27
  11  -5   1    1.71    0.33
 -11  -5  -1    1.66    0.24
  11  -5   1    1.26    0.39
 -11   5  -1    2.16    0.44
 -11   5  -1    1.31    0.45
 -13  -5  -1    1.60    0.26
 -13  -5  -1    1.96    0.28
  13  -5   1    1.73    0.45
 -13   5  -1    2.01    0.45
 -13   5  -1    1.46    0.51
 -15  -5  -1   10.25    0.55
 -15   5  -1    9.41    0.95
 -17   5  -1    1.61    0.59
 -19   5  -1   -0.23    0.56
 -21   5  -1    0.50    0.62
 -22   6   1    0.09    0.64
 -20   6   1    0.50    0.63
 -18   6   1   -0.41    0.51
 -16   6   1    0.48    0.48
  14  -6  -1    3.42    0.58
 -14  -6   1    4.07    0.32
 -14  -6   1    3.62    0.30
 -14  -6   1    3.30    0.49
 -14   6   1    3.37    0.62
 -12  -6   1    4.26    0.54
 -12  -6   1    5.56    0.40
  12  -6  -1    5.85    0.68
  12  -6  -1    6.18    0.58
  12  -6  -1    5.36    0.64
 -12  -6   1    5.44    0.39
 -12   6   1    5.83    0.66
 -12   6   1    4.74    0.66
  10  -6  -1    0.20    0.28
 -10  -6   1    0.14    0.27
  10  -6  -1    0.12    0.31
 -10  -6   1    0.01    0.19
  10  -6  -1    0.07    0.28
 -10  -6   1    0.02    0.19
 -10   6   1    0.39    0.30
  10   6  -1    0.08    0.14
 -10   6   1   -0.33    0.30
  10   6  -1   -0.16    0.13
   8  -6  -1    8.24    0.75
  -8  -6   1    8.95    0.53
   8  -6  -1    8.98    0.71
   8  -6  -1   10.16    0.74
  -8  -6   1    8.96    0.54
  -8  -6   1    9.81    0.53
   8  -6  -1    8.64    0.57
  -8  -6   1    9.47    0.68
   8   6  -1    8.30    0.49
  -8   6   1    9.84    0.80
   8   6  -1    8.71    0.52
  -8   6   1   10.46    0.73
  -8   6   1    9.35    0.77
  -6  -6   1    1.74    0.27
   6  -6  -1    1.70    0.36
   6  -6  -1    2.07    0.39
   6  -6  -1    0.95    0.33
   6  -6  -1    1.00    0.28
  -6  -6   1    1.60    0.34
  -6  -6   1    1.75    0.30
  -6  -6   1    1.74    0.28
  -6   6   1    1.13    0.33
  -6   6   1    1.67    0.35
   6   6  -1    1.66    0.28
  -6   6   1    1.56    0.35
   6   6  -1    1.47    0.27
   6   6  -1    1.78    0.23
   6   6  -1    1.81    0.20
  -4  -6   1   11.44    0.64
  -4  -6   1   13.56    0.67
  -4  -6   1   12.69    0.69
   4  -6  -1   13.25    0.79
   4  -6  -1   12.40    0.72
  -4  -6   1   11.93    0.69
   4  -6  -1   11.58    0.70
  -4  -6   1   12.28    0.76
   4  -6  -1   12.75    0.79
   4   6  -1   13.12    0.70
  -4   6   1   11.94    0.78
   4   6  -1   13.58    0.72
  -4   6   1   11.88    0.76
  -4   6   1   12.12    0.76
   4   6  -1   12.71    0.59
   4   6  -1   12.43    0.63
  -2  -6   1    1.26    0.27
  -2  -6   1    1.09    0.27
  -2  -6   1    1.39    0.31
   2  -6  -1    1.40    0.31
   2  -6  -1    1.00    0.29
  -2  -6   1    0.95    0.26
   2  -6  -1    0.68    0.26
  -2  -6   1    1.05    0.26
   2   6  -1    1.01    0.29
  -2   6   1    1.54    0.32
  -2   6   1    1.48    0.32
   2   6  -1    1.33    0.28
  -2   6   1    0.87    0.28
   2   6  -1    1.33    0.29
   0  -6  -1    6.94    0.55
   0  -6   1    6.80    0.58
   0  -6   1    7.09    0.56
   0  -6  -1    6.55    0.56
   0  -6   1    6.54    0.58
   0  -6   1    7.45    0.61
   0  -6  -1    5.37    0.51
   0   6   1    6.29    0.56
   0   6   1    5.53    0.50
   0   6   1    6.62    0.39
   0   6  -1    6.05    0.53
   0   6  -1    5.85    0.54
   0   6   1    5.84    0.53
  -2  -6  -1   29.07    1.29
   2  -6   1   30.15    1.27
  -2  -6  -1   32.22    1.24
  -2  -6  -1   32.20    1.27
   2  -6   1   32.25    1.36
  -2  -6  -1   31.97    1.24
   2  -6   1   32.74    1.38
  -2  -6  -1   29.94    1.29
   2  -6   1   30.42    1.38
  -2   6  -1   31.78    1.35
   2   6   1   32.08    1.24
  -2   6  -1   29.41    1.35
  -2   6  -1   30.28    1.31
   2   6   1   31.15    1.31
   4  -6   1    9.13    0.64
  -4  -6  -1   10.55    0.69
   4  -6   1   11.37    0.76
  -4  -6  -1    9.86    0.60
   4  -6   1    8.96    0.68
   4  -6   1    9.92    0.67
  -4  -6  -1   11.37    0.62
  -4  -6  -1   10.01    0.59
  -4  -6  -1   10.43    0.63
   4   6   1   10.18    0.62
  -4   6  -1    9.56    0.70
  -4   6  -1   10.40    0.71
  -4   6  -1   10.68    0.51
  -4   6  -1   11.40    0.75
   4   6   1   10.76    0.63
  -4   6  -1   11.34    0.69
  -6  -6  -1   11.19    0.61
  -6  -6  -1   10.60    0.63
   6  -6   1   11.34    0.77
   6  -6   1   12.25    0.74
  -6  -6  -1   12.12    0.62
  -6  -6  -1   10.80    0.59
  -6   6  -1   11.44    0.78
  -6   6  -1   11.28    0.78
   6   6   1   10.51    0.61
  -6   6  -1   10.72    0.69
   6   6   1   11.51    0.53
   6   6   1   10.48    0.62
  -6   6  -1   10.84    0.79
  -6   6  -1   11.41    0.63
  -8  -6  -1   16.32    0.71
   8  -6   1   13.80    0.90
  -8  -6  -1   14.41    0.70
   8  -6   1   14.77    0.83
  -8  -6  -1   13.98    0.70
  -8  -6  -1   14.39    0.71
   8   6   1   14.59    0.69
  -8   6  -1   15.02    0.82
  -8   6  -1   13.60    0.90
  -8   6  -1   16.15    0.86
  -8   6  -1   14.04    0.91
   8   6   1   14.39    0.71
  -8   6  -1   14.67    0.94
 -10  -6  -1    0.15    0.22
  10  -6   1    0.30    0.26
  10  -6   1    0.21    0.32
 -10  -6  -1    0.02    0.16
 -10   6  -1    0.28    0.37
 -10   6  -1    0.20    0.31
  10   6   1    0.14    0.17
  10   6   1   -0.03    0.17
  12  -6   1    0.22    0.35
 -12  -6  -1    0.69    0.23
 -12  -6  -1    0.94    0.26
 -12   6  -1    0.76    0.39
 -12   6  -1    1.22    0.50
 -14  -6  -1    2.86    0.35
 -14   6  -1    2.04    0.57
 -16  -6  -1    1.47    0.29
 -16   6  -1    1.90    0.63
 -18   6  -1    0.04    0.55
 -20   6  -1    0.32    0.64
 -21   7   1   -0.29    0.62
 -19   7   1    0.00    0.56
 -17   7   1    0.82    0.57
 -15  -7   1    0.33    0.22
 -15  -7   1    0.05    0.32
 -15   7   1    0.24    0.49
 -13  -7   1    1.81    0.46
  13  -7  -1    1.46    0.46
 -13  -7   1    1.72    0.30
 -13  -7   1    1.95    0.31
  13  -7  -1    2.95    0.58
 -13   7   1    2.21    0.57
 -13   7   1    1.73    0.49
  11  -7  -1    2.56    0.48
 -11  -7   1    3.23    0.51
 -11  -7   1    3.37    0.38
  11  -7  -1    1.72    0.47
 -11  -7   1    3.01    0.36
  11  -7  -1    3.76    0.53
  11   7  -1    2.79    0.27
 -11   7   1    2.68    0.52
 -11   7   1    3.87    0.63
  11   7  -1    3.10    0.28
  -9  -7   1   15.79    0.97
  -9  -7   1   15.68    0.78
   9  -7  -1   16.42    1.00
  -9  -7   1   14.79    0.76
   9  -7  -1   17.81    1.05
   9  -7  -1   15.28    0.94
   9  -7  -1   15.03    0.84
  -9   7   1   15.32    1.00
   9   7  -1   14.60    0.73
  -9   7   1   16.19    1.04
   9   7  -1   14.90    0.75
  -9   7   1   15.36    1.02
   7  -7  -1    1.43    0.42
   7  -7  -1    2.16    0.38
  -7  -7   1    2.49    0.35
  -7  -7   1    1.78    0.31
   7  -7  -1    1.94    0.38
  -7  -7   1    1.69    0.40
   7  -7  -1    1.78    0.42
  -7  -7   1    1.90    0.32
   7   7  -1    1.88    0.31
  -7   7   1    2.23    0.45
   7   7  -1    2.42    0.35
  -7   7   1    2.09    0.46
   7   7  -1    2.17    0.24
   7   7  -1    2.47    0.26
  -7   7   1    1.27    0.37
  -5  -7   1   97.77    3.66
  -5  -7   1   99.31    3.48
   5  -7  -1  101.81    3.46
  -5  -7   1  101.88    3.47
   5  -7  -1   99.36    3.64
  -5  -7   1  100.49    3.33
   5  -7  -1   99.08    3.64
   5  -7  -1   97.53    3.58
  -5  -7   1   98.80    3.33
  -5   7   1  101.53    3.50
  -5   7   1   97.08    3.64
  -5   7   1  105.04    3.65
   5   7  -1   99.42    3.47
   5   7  -1  102.07    3.19
   5   7  -1  110.50    3.51
   3  -7  -1   20.00    1.06
  -3  -7   1   20.28    0.98
   3  -7  -1   21.58    1.13
  -3  -7   1   20.86    1.02
   3  -7  -1   20.10    1.08
  -3  -7   1   21.42    1.10
  -3  -7   1   22.12    1.05
   3   7  -1   20.76    0.97
   3   7  -1   20.21    1.03
  -3   7   1   21.53    1.06
  -3   7   1   20.33    1.09
  -3   7   1   20.78    1.10
   1  -7  -1  171.24    5.63
   1  -7  -1  176.27    5.91
  -1  -7   1  158.57    5.97
   1  -7  -1  170.76    5.88
  -1  -7   1  184.72    5.89
  -1  -7   1  175.42    5.78
  -1  -7   1  180.28    5.63
  -1  -7   1  170.94    5.86
  -1   7   1  181.44    5.93
   1   7  -1  177.35    5.88
   1   7  -1  179.07    5.90
   1   7  -1  178.67    5.63
  -1   7   1  182.91    5.67
  -1   7   1  174.99    5.89
  -1   7   1  182.55    5.79
  -1  -7  -1   18.98    1.01
  -1  -7  -1   22.83    1.09
  -1  -7  -1   22.30    1.10
   1  -7   1   22.01    1.08
   1  -7   1   23.21    1.13
   1  -7   1   23.24    1.14
   1  -7   1   21.48    1.13
  -1   7  -1   22.52    1.13
   1   7   1   21.66    1.04
   1   7   1   22.81    1.12
  -1   7  -1   22.79    1.14
  -1   7  -1   24.64    1.11
   1   7   1   21.53    1.08
  -3  -7  -1   78.43    2.70
  -3  -7  -1   72.27    2.63
   3  -7   1   72.93    2.73
   3  -7   1   74.76    2.76
  -3  -7  -1   69.76    2.51
   3  -7   1   74.80    2.77
   3  -7   1   71.78    2.59
  -3  -7  -1   71.52    2.51
  -3  -7  -1   70.39    2.63
   3   7   1   74.64    2.66
  -3   7  -1   74.57    2.77
  -3   7  -1   69.83    2.72
   3   7   1   71.80    2.49
   3   7   1   70.98    2.63
  -3   7  -1   71.48    2.64
  -5  -7  -1    7.12    0.56
   5  -7   1    6.38    0.60
  -5  -7  -1    6.04    0.52
   5  -7   1    5.91    0.65
   5  -7   1    5.52    0.59
   5  -7   1    6.55    0.69
  -5  -7  -1    6.93    0.64
  -5  -7  -1    5.62    0.51
  -5  -7  -1    6.09    0.54
  -5   7  -1    6.85    0.70
  -5   7  -1    6.04    0.64
  -5   7  -1    5.31    0.61
  -5   7  -1    5.49    0.39
   5   7   1    6.89    0.57
   5   7   1    5.53    0.52
  -7  -7  -1   21.79    0.95
   7  -7   1   22.58    1.11
  -7  -7  -1   19.72    0.93
  -7  -7  -1   21.00    0.97
   7  -7   1   20.97    1.19
   7   7   1   21.00    0.80
   7   7   1   21.98    0.98
  -7   7  -1   21.23    0.97
  -7   7  -1   19.16    1.13
  -7   7  -1   20.00    1.15
  -7   7  -1   23.26    1.21
   7   7   1   19.04    0.95
  -9  -7  -1    5.60    0.50
  -9  -7  -1    5.82    0.48
  -9  -7  -1    5.55    0.48
   9  -7   1    6.22    0.64
   9  -7   1    6.27    0.73
  -9   7  -1    6.03    0.73
   9   7   1    6.08    0.47
  -9   7  -1    6.32    0.71
   9   7   1    6.07    0.49
  -9   7  -1    7.26    0.63
  11  -7   1    2.41    0.45
 -11  -7  -1    1.60    0.33
 -11  -7  -1    2.26    0.29
  11  -7   1    2.76    0.53
 -11  -7  -1    2.01    0.32
 -11   7  -1    1.41    0.45
  11   7   1    1.84    0.26
 -11   7  -1    2.44    0.56
  11   7   1    1.94    0.26
 -13  -7  -1   -0.30    0.26
 -13   7  -1   -0.15    0.44
 -15  -7  -1    0.65    0.39
 -15  -7  -1    0.79    0.29
 -15   7  -1    0.35    0.55
 -17  -7  -1    0.13    0.27
 -17   7  -1   -1.01    0.50
 -19   7  -1   -0.71    0.56
 -20   8   1    0.43    0.69
 -18   8   1    0.05    0.56
 -16  -8   1    1.00    0.28
 -16   8   1    0.24    0.52
 -14  -8   1    0.31    0.27
 -14  -8   1   -0.34    0.31
 -14   8   1    0.70    0.51
  12  -8  -1    0.15    0.20
  12  -8  -1   -0.47    0.30
  12  -8  -1   -0.73    0.35
 -12  -8   1   -0.23    0.26
 -12  -8   1    0.12    0.34
  12   8  -1    0.06    0.17
  12   8  -1   -0.03    0.18
 -12   8   1   -0.30    0.39
 -12   8   1   -0.10    0.32
  10  -8  -1    4.19    0.63
 -10  -8   1    2.63    0.39
  10  -8  -1    3.71    0.56
  10  -8  -1    4.12    0.63
 -10  -8   1    3.10    0.42
 -10  -8   1    2.91    0.51
  10  -8  -1    3.51    0.48
 -10   8   1    3.74    0.60
 -10   8   1    3.08    0.60
  10   8  -1    3.69    0.40
  10   8  -1    2.46    0.36
   8  -8  -1    3.76    0.57
   8  -8  -1    3.67    0.59
   8  -8  -1    3.13    0.56
  -8  -8   1    2.39    0.37
   8  -8  -1    3.30    0.48
  -8  -8   1    2.86    0.51
  -8  -8   1    2.12    0.38
  -8   8   1    2.98    0.57
   8   8  -1    3.38    0.28
   8   8  -1    2.81    0.39
  -8   8   1    2.90    0.53
  -8   8   1    4.14    0.60
   8   8  -1    2.73    0.40
   8   8  -1    3.35    0.30
  -6  -8   1    3.92    0.56
   6  -8  -1    4.64    0.59
   6  -8  -1    5.44    0.66
   6  -8  -1    4.58    0.59
   6  -8  -1    3.23    0.46
  -6  -8   1    4.77    0.50
  -6  -8   1    3.34    0.45
  -6  -8   1    4.36    0.49
  -6  -8   1    4.48    0.49
   6   8  -1    3.94    0.37
  -6   8   1    3.32    0.55
   6   8  -1    4.10    0.47
  -6   8   1    2.74    0.53
  -6   8   1    3.56    0.55
   6   8  -1    3.90    0.48
   4  -8  -1   12.10    0.96
  -4  -8   1   12.55    0.76
   4  -8  -1   11.69    0.80
  -4  -8   1   10.59    0.74
  -4  -8   1   11.30    0.74
   4  -8  -1   12.33    0.83
   4  -8  -1   11.53    0.83
  -4  -8   1   11.38    0.82
  -4   8   1   12.15    0.86
  -4   8   1   12.64    0.88
   4   8  -1   10.02    0.68
   4   8  -1   11.58    0.76
   4   8  -1   11.02    0.76
  -4   8   1   10.77    0.88
  -2  -8   1   10.12    0.78
  -2  -8   1   11.65    0.77
   2  -8  -1   12.08    0.85
  -2  -8   1   12.25    0.79
   2  -8  -1   11.96    0.81
   2  -8  -1   12.03    0.81
  -2  -8   1   11.18    0.57
  -2  -8   1   10.55    0.74
   2   8  -1   13.55    0.81
  -2   8   1   10.18    0.84
   2   8  -1   11.61    0.74
  -2   8   1   10.58    0.48
  -2   8   1   12.61    0.84
   2   8  -1   10.20    0.79
  -2   8   1   14.21    0.89
   0  -8   1    2.89    0.47
   0  -8  -1    3.00    0.45
   0  -8  -1    3.56    0.50
   0  -8   1    3.59    0.48
   0  -8   1    3.34    0.49
   0  -8  -1    3.35    0.48
   0  -8   1    2.30    0.43
   0   8  -1    4.19    0.54
   0   8   1    2.97    0.48
   0   8   1    3.66    0.49
   0   8   1    3.13    0.48
   0   8  -1    3.13    0.47
   0   8  -1    3.20    0.47
  -2  -8  -1    0.55    0.29
  -2  -8  -1    0.46    0.25
   2  -8   1    0.68    0.33
   2  -8   1    0.52    0.31
   2  -8   1    0.87    0.34
   2  -8   1    0.65    0.31
  -2  -8  -1    0.60    0.26
  -2  -8  -1    0.79    0.29
   2   8   1    0.85    0.30
  -2   8  -1    0.68    0.33
   2   8   1    0.65    0.32
  -2   8  -1    0.82    0.33
   2   8   1    0.18    0.26
  -2   8  -1    0.46    0.31
  -4  -8  -1    0.13    0.24
   4  -8   1   -0.27    0.26
  -4  -8  -1    0.57    0.27
   4  -8   1    0.75    0.34
  -4  -8  -1    0.45    0.25
   4  -8   1    0.53    0.30
  -4  -8  -1    0.38    0.26
  -4  -8  -1    0.48    0.27
   4  -8   1    0.56    0.32
   4   8   1    0.63    0.26
   4   8   1   -0.09    0.23
  -4   8  -1    0.22    0.30
  -4   8  -1   -0.07    0.31
   4   8   1    0.10    0.23
  -4   8  -1    0.31    0.31
  -6  -8  -1   -0.28    0.20
   6  -8   1    0.11    0.32
  -6  -8  -1    0.12    0.23
   6  -8   1   -0.07    0.28
  -6  -8  -1   -0.02    0.25
   6  -8   1   -0.28    0.24
   6   8   1    0.24    0.25
  -6   8  -1   -0.11    0.31
   6   8   1    0.05    0.20
  -6   8  -1   -0.23    0.15
   6   8   1   -0.06    0.23
  -6   8  -1   -0.10    0.28
  -6   8  -1   -0.09    0.29
  -8  -8  -1    1.82    0.34
   8  -8   1    1.43    0.44
   8  -8   1    1.98    0.49
  -8  -8  -1    1.41    0.33
  -8  -8  -1    1.78    0.36
   8   8   1    1.30    0.31
  -8   8  -1    1.49    0.49
  -8   8  -1    2.03    0.48
  -8   8  -1    1.84    0.33
   8   8   1    2.65    0.39
 -10  -8  -1    0.82    0.33
  10  -8   1    1.30    0.42
 -10  -8  -1    0.96    0.28
  10  -8   1    1.54    0.49
  10   8   1    0.85    0.29
 -10   8  -1    2.36    0.41
 -10   8  -1    0.26    0.37
  10   8   1    1.61    0.31
 -10   8  -1    1.46    0.52
 -12  -8  -1    1.30    0.36
  12   8   1    1.22    0.24
 -12   8  -1    2.19    0.62
  12   8   1    1.49    0.25
 -14  -8  -1   -0.70    0.32
 -14  -8  -1   -0.29    0.29
 -14   8  -1    0.39    0.54
 -16  -8  -1    0.36    0.31
 -16   8  -1   -0.65    0.55
 -18   8  -1    0.57    0.67
 -20   8  -1   -0.04    0.66
 -21   9   1   -0.79    0.70
 -19   9   1   -0.77    0.63
 -17  -9   1    0.04    0.28
 -17   9   1   -0.17    0.60
 -15  -9   1    0.63    0.43
 -15  -9   1    0.59    0.32
 -15   9   1    0.71    0.59
 -13  -9   1    5.92    0.56
 -13  -9   1    5.61    0.76
  13  -9  -1    5.99    0.86
 -13   9   1    5.72    0.83
  13   9  -1    6.50    0.40
  13   9  -1    5.84    0.39
 -11  -9   1    1.30    0.47
  11  -9  -1    1.10    0.46
 -11  -9   1    1.37    0.39
  11  -9  -1    2.92    0.60
  11  -9  -1    1.70    0.43
  11   9  -1    2.16    0.36
  11   9  -1    1.63    0.33
 -11   9   1    1.94    0.54
 -11   9   1    2.09    0.59
   9  -9  -1   -0.15    0.36
  -9  -9   1   -0.23    0.27
  -9  -9   1    0.01    0.27
   9  -9  -1    0.15    0.31
   9  -9  -1    0.27    0.35
   9  -9  -1   -0.47    0.34
  -9  -9   1    0.23    0.36
  -9   9   1   -0.17    0.38
   9   9  -1   -0.27    0.24
  -9   9   1    0.26    0.39
   9   9  -1    0.06    0.28
   7  -9  -1    1.38    0.43
   7  -9  -1    0.96    0.44
   7  -9  -1    0.30    0.37
  -7  -9   1    0.92    0.35
  -7  -9   1    0.77    0.31
   7  -9  -1    1.20    0.38
  -7  -9   1    0.20    0.32
  -7   9   1    0.60    0.40
   7   9  -1    0.42    0.29
   7   9  -1    1.04    0.27
   7   9  -1    0.93    0.24
   7   9  -1    0.79    0.32
  -7   9   1    0.53    0.37
  -7   9   1    0.76    0.44
  -5  -9   1    2.54    0.38
   5  -9  -1    1.83    0.42
  -5  -9   1    1.65    0.44
   5  -9  -1    0.85    0.41
   5  -9  -1    1.58    0.44
  -5  -9   1    1.70    0.39
  -5  -9   1    1.13    0.32
   5  -9  -1    1.27    0.43
   5   9  -1    1.82    0.40
  -5   9   1    1.13    0.43
  -5   9   1    1.93    0.48
  -5   9   1    1.97    0.47
   5   9  -1    1.99    0.37
   5   9  -1    1.93    0.41
  -3  -9   1    0.58    0.35
  -3  -9   1    0.42    0.31
  -3  -9   1   -0.05    0.26
  -3  -9   1    0.56    0.28
   3  -9  -1    0.62    0.36
   3  -9  -1    0.28    0.32
  -3  -9   1    0.45    0.20
   3  -9  -1    0.45    0.31
   3  -9  -1    0.02    0.27
   3   9  -1    0.40    0.30
  -3   9   1    0.43    0.35
   3   9  -1    0.43    0.28
  -3   9   1    0.48    0.34
   3   9  -1    0.67    0.33
  -3   9   1    0.90    0.36
  -1  -9   1    0.82    0.37
   1  -9  -1    1.64    0.40
  -1  -9   1    1.11    0.39
  -1  -9   1    1.08    0.37
  -1  -9   1    1.42    0.19
   1  -9  -1    0.84    0.38
   1  -9  -1    0.53    0.33
  -1  -9   1    0.96    0.35
  -1   9   1    1.76    0.41
  -1   9   1    0.97    0.38
   1   9  -1    1.57    0.40
   1   9  -1    1.20    0.38
  -1   9   1    1.70    0.44
   1   9  -1    1.31    0.40
   1  -9   1    1.07    0.38
  -1  -9  -1    0.55    0.30
  -1  -9  -1    0.68    0.31
  -1  -9  -1    0.34    0.30
   1  -9   1    0.57    0.32
   1  -9   1    0.50    0.36
   1  -9   1    0.26    0.32
   1   9   1    0.39    0.29
   1   9   1   -0.21    0.28
   1   9   1    0.31    0.30
  -1   9  -1    0.41    0.35
  -1   9  -1   -0.15    0.28
  -1   9  -1    0.71    0.34
   3  -9   1    0.42    0.32
  -3  -9  -1   -0.12    0.23
   3  -9   1    0.22    0.35
  -3  -9  -1    0.08    0.24
  -3  -9  -1    0.19    0.29
   3  -9   1    0.75    0.35
   3  -9   1    0.56    0.34
  -3  -9  -1    0.29    0.29
   3   9   1    0.09    0.29
  -3   9  -1    0.41    0.35
   3   9   1    0.24    0.27
  -3   9  -1   -0.04    0.32
  -3   9  -1    0.33    0.34
   3   9   1   -0.04    0.09
   5  -9   1    1.47    0.43
   5  -9   1    0.73    0.41
  -5  -9  -1    1.04    0.34
  -5  -9  -1    1.49    0.39
  -5  -9  -1    1.32    0.37
   5  -9   1    0.64    0.38
   5  -9   1    1.36    0.40
  -5   9  -1    0.06    0.38
   5   9   1    0.79    0.34
   5   9   1    1.21    0.32
   5   9   1    0.90    0.37
  -5   9  -1    1.04    0.40
  -5   9  -1    0.75    0.40
  -7  -9  -1    3.47    0.48
  -7  -9  -1    2.63    0.44
   7  -9   1    2.86    0.57
  -7  -9  -1    3.36    0.50
   7  -9   1    4.58    0.67
  -7   9  -1    3.43    0.62
   7   9   1    2.91    0.45
  -7   9  -1    3.19    0.34
  -7   9  -1    3.89    0.63
  -7   9  -1    2.66    0.59
   7   9   1    3.69    0.49
   7   9   1    3.92    0.41
   9  -9   1    2.86    0.60
  -9  -9  -1    2.78    0.42
   9  -9   1    2.49    0.55
  -9  -9  -1    3.09    0.48
   9   9   1    2.58    0.43
   9   9   1    3.14    0.45
  -9   9  -1    1.95    0.51
  -9   9  -1    2.69    0.40
  -9   9  -1    2.67    0.62
  11  -9   1    2.61    0.58
 -11  -9  -1    2.24    0.45
 -11  -9  -1    2.48    0.38
  11   9   1    2.22    0.37
 -11   9  -1    3.14    0.69
  11   9   1    2.54    0.39
 -13  -9  -1    0.87    0.38
 -13  -9  -1    0.69    0.42
 -13   9  -1   -0.21    0.49
  13   9   1    0.16    0.19
 -15  -9  -1   -0.31    0.38
 -15  -9  -1   -0.15    0.33
 -15   9  -1    0.29    0.61
 -17  -9  -1    0.17    0.34
 -17   9  -1    0.11    0.62
 -19   9  -1   -0.26    0.68
 -20  10   1    0.80    0.81
 -18 -10   1    0.69    0.35
 -18  10   1   -0.31    0.61
 -16 -10   1    0.01    0.34
 -16  10   1    0.60    0.62
 -14 -10   1    0.15    0.43
 -14 -10   1    0.43    0.38
 -14  10   1   -0.41    0.52
 -12 -10   1    4.72    0.71
  12 -10  -1    3.59    0.77
 -12 -10   1    2.56    0.49
  12  10  -1    3.37    0.44
  12  10  -1    3.11    0.40
 -12  10   1    1.84    0.67
  10 -10  -1    0.39    0.36
 -10 -10   1    0.49    0.44
 -10 -10   1    0.17    0.36
  10 -10  -1    0.36    0.43
  10 -10  -1    0.08    0.47
 -10  10   1    0.07    0.47
  10  10  -1    0.83    0.35
  10  10  -1    0.76    0.33
 -10  10   1    0.56    0.43
   8 -10  -1    0.26    0.43
  -8 -10   1    0.02    0.35
   8 -10  -1    0.01    0.44
   8 -10  -1    0.47    0.38
  -8 -10   1    0.55    0.36
   8 -10  -1    0.31    0.36
   8  10  -1    0.34    0.31
   8  10  -1    0.24    0.32
  -8  10   1   -0.09    0.38
  -8  10   1   -0.47    0.36
  -6 -10   1    4.14    0.56
   6 -10  -1    4.33    0.66
  -6 -10   1    3.85    0.55
   6 -10  -1    4.15    0.65
  -6 -10   1    3.64    0.62
   6 -10  -1    3.79    0.59
   6 -10  -1    4.01    0.69
  -6  10   1    5.51    0.75
  -6  10   1    5.20    0.73
   6  10  -1    4.51    0.58
   6  10  -1    4.83    0.60
   6  10  -1    5.16    0.53
  -6  10   1    5.87    0.78
   4 -10  -1    5.98    0.76
  -4 -10   1    6.35    0.54
   4 -10  -1    6.26    0.80
  -4 -10   1    6.17    0.68
  -4 -10   1    6.33    0.76
  -4 -10   1    5.27    0.65
   4 -10  -1    5.63    0.72
   4 -10  -1    4.85    0.66
  -4  10   1    5.28    0.72
  -4  10   1    6.56    0.77
   4  10  -1    5.16    0.63
  -4  10   1    4.54    0.69
   4  10  -1    5.33    0.60
  -2 -10   1    1.62    0.45
   2 -10  -1    1.84    0.46
  -2 -10   1    1.51    0.43
  -2 -10   1    0.76    0.39
   2 -10  -1    1.78    0.45
   2 -10  -1    1.85    0.48
  -2 -10   1    1.49    0.41
  -2 -10   1    1.94    0.27
   2 -10  -1    1.66    0.46
  -2  10   1    1.06    0.44
   2  10  -1    1.86    0.47
   2  10  -1    1.12    0.41
   2  10  -1    1.55    0.42
  -2  10   1    1.75    0.47
  -2  10   1    1.38    0.44
   0 -10  -1    4.13    0.61
   0 -10   1    3.34    0.56
   0 -10   1    6.23    0.72
   0 -10   1    4.04    0.60
   0 -10  -1    4.19    0.61
   0 -10  -1    3.40    0.57
   0 -10   1    1.66    0.47
   0 -10  -1    4.30    0.61
   0  10   1    3.26    0.57
   0  10   1    3.48    0.55
   0  10  -1    4.01    0.60
   0  10  -1    3.32    0.56
   0  10  -1    2.80    0.51
   0  10   1    4.64    0.63
   2 -10   1    1.28    0.45
   2 -10   1    0.35    0.37
  -2 -10  -1    2.00    0.46
  -2 -10  -1    1.13    0.37
  -2 -10  -1    0.82    0.38
   2 -10   1    0.94    0.39
   2 -10   1    0.66    0.38
  -2  10  -1    0.28    0.34
   2  10   1    1.01    0.40
  -2  10  -1    0.88    0.44
  -2  10  -1    0.74    0.41
   2  10   1    1.06    0.40
   2  10   1    0.48    0.33
  -4 -10  -1    0.67    0.36
   4 -10   1    1.65    0.50
   4 -10   1    0.92    0.44
   4 -10   1    1.38    0.43
  -4 -10  -1    1.38    0.42
  -4 -10  -1    0.89    0.34
   4 -10   1    0.57    0.43
  -4  10  -1    2.03    0.49
   4  10   1    1.34    0.39
  -4  10  -1    1.53    0.48
   4  10   1    1.80    0.39
  -4  10  -1    0.76    0.45
   4  10   1    1.29    0.43
   6 -10   1   10.89    0.96
  -6 -10  -1    8.83    0.78
   6 -10   1   10.01    0.99
  -6 -10  -1    9.08    0.79
   6 -10   1    8.30    0.82
  -6  10  -1    9.18    0.95
  -6  10  -1    8.05    0.90
   6  10   1    8.15    0.77
  -6  10  -1    8.31    0.92
   6  10   1    9.15    0.81
  -8 -10  -1    2.11    0.48
   8 -10   1    2.75    0.60
   8 -10   1    2.70    0.58
  -8 -10  -1    1.70    0.42
  -8  10  -1    3.02    0.67
  -8  10  -1    2.02    0.55
   8  10   1    1.97    0.44
   8  10   1    2.28    0.45
 -10 -10  -1    0.09    0.34
  10 -10   1   -0.09    0.44
  10  10   1    0.87    0.33
 -10  10  -1    0.36    0.50
  10  10   1    0.53    0.33
 -12 -10  -1    0.25    0.39
 -12 -10  -1    0.27    0.40
  12  10   1    1.31    0.33
  12  10   1    0.44    0.31
 -12  10  -1    0.67    0.61
 -14 -10  -1    1.57    0.45
 -14 -10  -1    1.47    0.53
 -14  10  -1    2.21    0.71
 -16 -10  -1   -0.07    0.38
 -16  10  -1   -0.06    0.63
 -18 -10  -1    0.03    0.36
 -18  10  -1    0.79    0.75
 -19  11   1    1.35    0.79
 -17 -11   1   -0.07    0.37
 -17  11   1    0.45    0.70
 -15 -11   1    0.94    0.55
 -15 -11   1    0.50    0.43
 -15  11   1    0.55    0.68
 -13 -11   1   -0.61    0.37
 -13 -11   1    0.39    0.41
  13  11  -1    0.16    0.31
  13  11  -1    0.62    0.32
 -13  11   1    0.23    0.58
 -11 -11   1    1.10    0.44
  11 -11  -1    1.31    0.54
  11 -11  -1    1.43    0.57
 -11 -11   1    0.22    0.43
  11 -11  -1    0.55    0.41
  11  11  -1    1.39    0.40
  11  11  -1    0.63    0.36
 -11  11   1    0.71    0.57
  -9 -11   1    3.66    0.67
   9 -11  -1    3.44    0.68
   9 -11  -1    4.98    0.81
  -9 -11   1    3.66    0.59
   9 -11  -1    4.07    0.63
  -9  11   1    3.82    0.71
   9  11  -1    3.52    0.53
   9  11  -1    3.23    0.56
  -9  11   1    4.31    0.74
   7 -11  -1    1.65    0.57
   7 -11  -1    3.53    0.66
  -7 -11   1    2.54    0.55
  -7 -11   1    1.61    0.52
   7 -11  -1    1.65    0.54
   7 -11  -1    3.20    0.60
  -7  11   1    2.32    0.61
  -7  11   1    2.93    0.65
   7  11  -1    3.12    0.53
  -7  11   1    1.81    0.56
   7  11  -1    3.16    0.54
  -5 -11   1    5.33    0.68
   5 -11  -1    4.37    0.70
  -5 -11   1    4.31    0.64
  -5 -11   1    4.54    0.71
  -5 -11   1    5.83    0.56
   5 -11  -1    4.81    0.71
   5 -11  -1    3.71    0.68
   5 -11  -1    6.02    0.77
  -5  11   1    5.35    0.78
   5  11  -1    5.11    0.61
   5  11  -1    3.41    0.58
   5  11  -1    4.60    0.63
  -5  11   1    5.71    0.79
  -5  11   1    4.23    0.72
   3 -11  -1    6.20    0.77
  -3 -11   1    4.65    0.71
   3 -11  -1    4.26    0.67
   3 -11  -1    5.07    0.74
  -3 -11   1    4.80    0.45
   3 -11  -1    5.28    0.74
  -3 -11   1    5.18    0.68
  -3 -11   1    5.00    0.68
  -3  11   1    4.32    0.70
  -3  11   1    4.85    0.72
   3  11  -1    5.07    0.64
   3  11  -1    6.21    0.74
   3  11  -1    4.14    0.64
  -3  11   1    5.34    0.74
  -1 -11   1   18.42    1.17
  -1 -11   1   17.00    1.11
  -1 -11   1   14.62    1.01
   1 -11  -1   16.70    1.12
  -1 -11   1   16.24    1.15
   1 -11  -1   16.64    1.12
   1 -11  -1   16.99    1.16
   1  11  -1   16.12    1.11
  -1  11   1   17.49    1.13
   1  11  -1   17.28    1.14
   1  11  -1   17.36    1.11
  -1  11   1   15.68    1.14
  -1  11   1   17.17    1.15
   1 -11   1    2.01    0.52
  -1 -11  -1    2.32    0.52
  -1 -11  -1    2.90    0.58
  -1 -11  -1    1.63    0.47
   1 -11   1    2.00    0.51
   1 -11   1    3.20    0.62
   1 -11   1    2.71    0.60
   1  11   1    1.20    0.46
   1  11   1    1.15    0.45
  -1  11  -1    2.88    0.59
   1  11   1    2.38    0.52
  -1  11  -1    1.83    0.53
  -1  11  -1    2.12    0.53
   3 -11   1   17.67    1.10
  -3 -11  -1   16.07    1.09
  -3 -11  -1   16.82    1.06
   3 -11   1   16.83    1.16
   3 -11   1   15.38    1.08
   3 -11   1   15.29    1.15
  -3  11  -1   15.57    1.13
   3  11   1   13.22    1.00
   3  11   1   15.06    0.98
  -3  11  -1   14.32    1.22
  -3  11  -1   15.66    1.13
   3  11   1   14.26    1.02
  -5 -11  -1    1.16    0.45
   5 -11   1    0.86    0.44
   5 -11   1    0.97    0.48
  -5 -11  -1    1.12    0.42
   5 -11   1    0.01    0.35
   5 -11   1    0.63    0.48
   5  11   1    1.14    0.42
   5  11   1    0.69    0.38
   5  11   1    0.61    0.36
  -5  11  -1    1.07    0.48
  -5  11  -1   -0.07    0.39
  -5  11  -1    0.97    0.51
  -7 -11  -1    3.12    0.57
   7 -11   1    2.69    0.64
  -7 -11  -1    2.88    0.52
   7 -11   1    3.50    0.61
   7 -11   1    3.55    0.69
   7  11   1    2.64    0.52
  -7  11  -1    3.35    0.67
  -7  11  -1    2.67    0.66
   7  11   1    2.59    0.52
  -9 -11  -1    1.61    0.48
  -9 -11  -1    1.91    0.57
   9 -11   1    1.68    0.58
  -9  11  -1    2.46    0.71
   9  11   1    1.78    0.45
   9  11   1    1.28    0.41
 -11 -11  -1    1.60    0.50
 -11 -11  -1    2.60    0.63
  11  11   1    2.35    0.46
 -11  11  -1    0.86    0.64
  11  11   1    1.96    0.42
 -13 -11  -1    1.46    0.56
 -13 -11  -1    1.73    0.51
  13  11   1    2.46    0.40
 -13  11  -1    2.72    0.77
  13  11   1    2.25    0.37
 -15 -11  -1    1.27    0.48
 -15  11  -1    0.56    0.70
 -17 -11  -1    0.07    0.40
 -17  11  -1   -0.13    0.68
 -18 -12   1   -0.03    0.40
 -18  12   1    0.32    0.75
 -16 -12   1    0.63    0.48
 -16  12   1   -0.17    0.66
 -14 -12   1    0.13    0.54
 -14 -12   1    1.03    0.48
 -14  12   1   -0.29    0.60
  14  12  -1    0.28    0.30
  12 -12  -1    0.09    0.52
 -12 -12   1    0.16    0.42
 -12 -12   1    0.43    0.50
 -12  12   1   -0.08    0.49
  12  12  -1   -0.12    0.31
 -10 -12   1   11.46    1.14
 -10 -12   1   13.86    0.98
  10 -12  -1   11.27    1.06
  10 -12  -1   13.83    1.21
  10 -12  -1   12.32    1.28
 -10  12   1   11.17    1.21
  10  12  -1   10.93    0.92
   8 -12  -1   18.52    1.39
  -8 -12   1   16.60    1.25
   8 -12  -1   12.95    1.28
   8 -12  -1   14.24    1.08
  -8 -12   1   16.58    1.10
  -8  12   1   14.33    1.30
  -8  12   1   16.72    1.41
   8  12  -1   13.70    1.02
   6 -12  -1    2.48    0.64
  -6 -12   1    2.52    0.57
   6 -12  -1    2.42    0.61
  -6 -12   1    3.12    0.66
   6 -12  -1    2.60    0.62
   6 -12  -1    2.86    0.66
   6  12  -1    3.04    0.55
  -6  12   1    1.32    0.58
   6  12  -1    2.62    0.53
  -6  12   1    3.09    0.68
  -6  12   1    2.42    0.62
  -4 -12   1   10.89    1.01
   4 -12  -1   14.96    1.25
   4 -12  -1   14.13    1.05
  -4 -12   1    8.76    0.91
  -4 -12   1    8.70    0.98
   4 -12  -1   12.11    1.14
   4 -12  -1   12.55    1.10
  -4 -12   1   10.98    0.72
   4  12  -1   10.06    0.99
  -4  12   1   10.36    1.05
   4  12  -1   11.27    1.03
   4  12  -1   12.05    0.98
  -4  12   1   12.28    1.16
  -4  12   1   14.17    1.25
   2 -12  -1   10.54    1.06
  -2 -12   1    9.92    1.04
  -2 -12   1   12.04    1.04
   2 -12  -1   10.01    1.01
   2 -12  -1   11.59    1.11
  -2 -12   1    9.03    0.95
   2 -12  -1   12.54    1.12
  -2  12   1    9.84    0.98
   2  12  -1   13.00    1.03
   2  12  -1   11.20    1.04
  -2  12   1   10.67    1.05
  -2  12   1    8.48    0.97
   2  12  -1   12.24    1.06
   0 -12  -1   13.91    1.16
   0 -12  -1   14.64    1.22
   0 -12  -1   14.53    1.24
   0 -12   1   15.73    1.24
   0 -12   1   15.54    1.16
   0  12  -1   15.09    1.25
   0  12   1   13.25    1.12
   0  12   1   15.04    1.25
   0  12  -1   12.82    1.11
   0  12  -1   12.32    1.16
   0  12   1   13.12    1.14
   2 -12   1    3.99    0.72
  -2 -12  -1    3.97    0.70
  -2 -12  -1    5.25    0.74
   2 -12   1    4.50    0.73
   2 -12   1    5.65    0.77
  -2 -12  -1    5.01    0.71
   2 -12   1    4.56    0.75
  -2  12  -1    3.37    0.66
  -2  12  -1    4.43    0.74
  -2  12  -1    3.41    0.65
   2  12   1    3.93    0.68
   2  12   1    4.84    0.70
   2  12   1    4.26    0.66
   4 -12   1   24.79    1.46
   4 -12   1   25.47    1.46
   4 -12   1   24.33    1.54
   4 -12   1   24.49    1.50
  -4 -12  -1   23.08    1.34
  -4 -12  -1   24.51    1.40
  -4 -12  -1   24.11    1.48
  -4  12  -1   24.64    1.52
   4  12   1   21.30    1.22
  -4  12  -1   21.95    1.40
   4  12   1   22.34    1.38
  -4  12  -1   23.47    1.54
  -6 -12  -1    1.49    0.52
   6 -12   1    1.69    0.53
   6 -12   1    1.29    0.53
  -6 -12  -1    1.84    0.56
  -6  12  -1    1.38    0.55
  -6  12  -1    1.43    0.62
   6  12   1    0.32    0.41
   8 -12   1    0.82    0.56
  -8 -12  -1    0.64    0.46
  -8 -12  -1    0.37    0.46
  -8  12  -1    0.76    0.57
  -8  12  -1   -0.19    0.44
   8  12   1    1.19    0.44
 -10 -12  -1    0.33    0.49
 -10 -12  -1    0.64    0.45
  10 -12   1    0.12    0.52
  10  12   1    0.52    0.39
 -10  12  -1   -0.13    0.56
 -12 -12  -1    1.28    0.58
 -12 -12  -1    1.56    0.55
  12  12   1    1.88    0.45
 -12  12  -1    1.55    0.72
 -14 -12  -1    0.67    0.49
 -14 -12  -1   -0.51    0.42
 -14  12  -1    0.55    0.69
 -16 -12  -1    0.47    0.45
 -16  12  -1   -0.14    0.73
 -17 -13   1    0.30    0.47
 -17  13   1   -0.41    0.71
 -15 -13   1    0.16    0.53
 -15 -13   1    0.53    0.50
 -15  13   1   -0.14    0.68
 -13 -13   1   -0.21    0.46
 -13 -13   1   -0.14    0.50
 -13  13   1   -0.25    0.63
  11 -13  -1   -0.11    0.56
 -11 -13   1    0.58    0.52
 -11 -13   1    0.10    0.46
  11 -13  -1   -0.30    0.41
 -11  13   1    0.66    0.66
  11  13  -1   -0.04    0.37
   9 -13  -1    7.25    0.99
   9 -13  -1    5.47    0.81
  -9 -13   1    7.61    0.85
   9 -13  -1    6.52    0.99
  -9 -13   1    6.83    0.94
   9  13  -1    4.69    0.68
  -9  13   1    6.24    0.98
   7 -13  -1    6.15    0.92
  -7 -13   1    5.67    0.87
  -7 -13   1    6.45    0.83
   7 -13  -1    8.21    1.04
   7 -13  -1    6.98    0.90
  -7  13   1    7.18    0.97
   7  13  -1    7.51    0.85
  -7  13   1    8.11    1.02
   5 -13  -1    5.16    0.80
   5 -13  -1    6.65    0.91
  -5 -13   1    6.14    0.80
   5 -13  -1    6.35    0.90
   5 -13  -1    5.75    0.88
  -5 -13   1    5.27    0.83
   5  13  -1    7.52    0.88
  -5  13   1    7.48    0.97
  -5  13   1    5.44    0.86
  -5  13   1    6.86    0.94
  -3 -13   1    3.03    0.62
  -3 -13   1    1.48    0.55
   3 -13  -1    1.71    0.59
   3 -13  -1    1.50    0.61
  -3 -13   1    1.07    0.53
   3 -13  -1    1.11    0.51
   3  13  -1    1.17    0.50
  -3  13   1    1.81    0.60
  -3  13   1    1.77    0.62
  -3  13   1    2.34    0.61
   3  13  -1    1.90    0.52
  -1 -13   1   16.71    1.22
   1 -13  -1   17.09    1.35
  -1 -13   1   17.03    1.26
   1 -13  -1   19.25    1.35
   1 -13  -1   18.92    1.32
  -1 -13   1   16.92    1.27
   1  13  -1   16.57    1.23
  -1  13   1   17.32    1.28
  -1  13   1   17.00    1.23
   1  13  -1   17.76    1.22
   1 -13   1    0.28    0.52
   1 -13   1    2.55    0.64
  -1 -13  -1    0.93    0.49
  -1 -13  -1    1.98    0.59
  -1 -13  -1    0.50    0.46
   1 -13   1    1.84    0.57
  -1  13  -1    1.57    0.58
   1  13   1    2.44    0.64
   1  13   1    1.62    0.57
  -1  13  -1    0.91    0.51
  -3 -13  -1   19.56    1.48
  -3 -13  -1   27.52    1.51
   3 -13   1   24.57    1.49
   3 -13   1   25.66    1.64
   3 -13   1   25.30    1.57
   3 -13   1   28.84    1.69
   3  13   1   26.37    1.44
   3  13   1   29.25    1.61
  -3  13  -1   26.74    1.63
  -3  13  -1   26.66    1.59
  -3  13  -1   27.32    1.69
   5 -13   1    7.14    0.91
  -5 -13  -1    5.86    0.81
  -5 -13  -1    7.17    0.94
   5 -13   1    6.82    0.90
  -5  13  -1    8.62    1.06
  -5  13  -1    8.16    1.03
   5  13   1    7.07    0.87
  -5  13  -1    8.04    1.03
   7 -13   1    5.71    0.83
   7 -13   1    5.82    0.92
  -7 -13  -1    3.99    0.72
  -7 -13  -1    4.57    0.82
  -7  13  -1    4.96    0.89
  -7  13  -1    6.27    0.93
   7  13   1    4.70    0.71
  -9 -13  -1    0.29    0.49
  -9 -13  -1    0.81    0.55
   9 -13   1   -0.35    0.54
  -9  13  -1    1.00    0.63
   9  13   1    0.86    0.42
 -11 -13  -1    4.72    0.75
 -11 -13  -1    3.28    0.77
  11  13   1    3.61    0.60
 -11  13  -1    3.67    0.90
 -13 -13  -1    1.22    0.54
 -13  13  -1    1.02    0.77
 -15 -13  -1    0.64    0.51
 -15  13  -1   -0.01    0.74
 -16 -14   1   -0.53    0.49
 -16  14   1   -0.06    0.75
 -14 -14   1   -0.20    0.50
 -14  14   1    0.58    0.75
 -12 -14   1    0.25    0.55
 -12  14   1    0.76    0.73
 -10 -14   1    0.15    0.51
  10 -14  -1    0.36    0.63
  10 -14  -1    1.02    0.67
  10 -14  -1    0.69    0.55
 -10 -14   1    0.42    0.52
 -10  14   1    1.21    0.72
  10  14  -1    0.08    0.42
  -8 -14   1    3.98    0.75
   8 -14  -1    3.41    0.81
   8 -14  -1    2.69    0.78
  -8 -14   1    3.31    0.78
   8 -14  -1    3.75    0.75
  -8  14   1    3.86    0.84
   8  14  -1    3.94    0.70
   6 -14  -1    2.25    0.65
  -6 -14   1   -0.22    0.46
   6 -14  -1   -0.22    0.50
   6 -14  -1    1.35    0.61
  -6 -14   1    0.49    0.52
   6  14  -1    0.54    0.48
  -6  14   1    0.52    0.61
  -6  14   1    1.22    0.62
   4 -14  -1    2.90    0.74
  -4 -14   1    3.06    0.72
  -4 -14   1    2.91    0.68
   4 -14  -1    2.71    0.71
   4 -14  -1    3.34    0.71
   4  14  -1    2.04    0.63
  -4  14   1    1.83    0.67
  -4  14   1    2.57    0.74
  -2 -14   1    1.14    0.52
   2 -14  -1    1.03    0.58
   2 -14  -1    1.52    0.62
   2 -14  -1    1.89    0.65
  -2 -14   1    1.35    0.60
   2  14  -1    0.84    0.55
  -2  14   1    1.74    0.61
   2  14  -1    2.89    0.65
  -2  14   1    0.92    0.57
   0 -14  -1    2.86    0.71
   0 -14  -1    3.71    0.77
   0 -14   1    3.98    0.78
   0 -14   1    4.02    0.77
   0  14  -1    4.63    0.81
   0  14   1    5.68    0.87
   0  14   1    3.36    0.72
   0  14  -1    2.38    0.67
  -2 -14  -1    3.47    0.72
   2 -14   1    3.63    0.74
  -2 -14  -1    4.01    0.78
   2 -14   1    2.44    0.71
  -2  14  -1    4.84    0.85
   2  14   1    3.28    0.71
   2  14   1    4.26    0.76
  -2  14  -1    5.67    0.88
   4 -14   1    2.37    0.67
   4 -14   1    2.95    0.73
  -4 -14  -1    2.79    0.70
  -4 -14  -1    3.13    0.72
  -4  14  -1    2.68    0.72
  -4  14  -1    1.92    0.67
   4  14   1    2.10    0.60
  -6 -14  -1    0.77    0.55
   6 -14   1    0.20    0.60
   6 -14   1    0.69    0.52
  -6 -14  -1    0.75    0.57
  -6  14  -1    0.30    0.56
  -6  14  -1    0.49    0.64
   6  14   1    0.55    0.49
  -8 -14  -1    2.46    0.65
   8 -14   1    3.71    0.80
  -8 -14  -1    1.75    0.67
   8  14   1    3.05    0.65
  -8  14  -1    2.57    0.81
 -10 -14  -1    0.95    0.56
 -10  14  -1    0.21    0.66
 -12 -14  -1    0.90    0.58
 -12  14  -1    0.98    0.83
 -14 -14  -1   -0.35    0.51
 -14  14  -1   -0.29    0.71
 -15 -15   1    0.08    0.56
 -15  15   1   -0.14    0.75
 -13 -15   1    0.70    0.61
 -13  15   1    1.41    0.84
 -11 -15   1    0.54    0.57
 -11  15   1    1.05    0.79
  -9 -15   1    2.77    0.73
   9 -15  -1   -0.03    0.59
   9 -15  -1    1.27    0.73
   9 -15  -1    1.62    0.63
  -9  15   1    0.71    0.75
   7 -15  -1    0.32    0.51
   7 -15  -1    0.15    0.57
  -7 -15   1    0.47    0.57
   7 -15  -1    0.49    0.63
   7  15  -1    1.05    0.54
  -7  15   1    1.20    0.72
   5 -15  -1   12.36    1.25
  -5 -15   1    9.26    1.09
  -5 -15   1   10.29    1.21
   5 -15  -1   12.34    1.26
  -5  15   1   10.61    1.26
  -5  15   1   10.50    1.27
   5  15  -1   10.53    1.12
   3 -15  -1    2.01    0.69
  -3 -15   1    1.44    0.61
  -3 -15   1    1.92    0.68
   3 -15  -1    0.67    0.54
  -3  15   1    0.95    0.67
  -3  15   1    2.31    0.75
   3  15  -1    0.78    0.55
   1 -15  -1    8.72    1.09
  -1 -15   1   11.39    1.25
  -1 -15   1   10.96    1.17
   1 -15  -1   11.63    1.26
   1  15  -1   14.29    1.35
   1  15  -1   11.62    1.16
  -1  15   1   10.34    1.17
  -1  15   1   10.60    1.15
   1 -15   1    2.33    0.72
  -1 -15  -1    1.26    0.63
   1 -15   1    1.32    0.59
  -1 -15  -1    1.19    0.65
   1  15   1    1.32    0.60
  -1  15  -1    1.67    0.68
  -1  15  -1   -0.40    0.49
   3 -15   1    8.15    1.07
  -3 -15  -1    8.10    1.08
  -3 -15  -1    8.33    1.01
   3 -15   1    7.56    1.04
  -3  15  -1    3.67    0.85
   3  15   1    9.46    1.10
  -3  15  -1    7.45    1.09
  -5 -15  -1    0.33    0.55
   5 -15   1    0.31    0.54
   5 -15   1    1.51    0.70
  -5  15  -1    1.04    0.67
  -5  15  -1    0.73    0.61
   5  15   1    0.93    0.58
   7 -15   1    5.57    0.94
   7 -15   1    3.26    0.85
  -7 -15  -1    5.80    0.87
  -7  15  -1    3.70    0.89
   7  15   1    3.95    0.77
   9 -15   1    0.38    0.71
  -9 -15  -1    2.10    0.67
  -9  15  -1    0.75    0.77
 -11 -15  -1    0.89    0.59
 -11  15  -1   -0.55    0.72
 -13 -15  -1    0.39    0.56
 -13  15  -1    0.02    0.81
 -14 -16   1    0.07    0.62
 -14  16   1   -0.34    0.76
 -12 -16   1    0.85    0.65
 -12  16   1    0.24    0.78
 -10 -16   1    0.54    0.64
  10 -16  -1   -0.41    0.53
 -10  16   1   -0.72    0.68
   8 -16  -1   -0.07    0.53
   8 -16  -1    0.98    0.74
  -8 -16   1    1.05    0.64
  -8  16   1   -0.14    0.70
  -6 -16   1    0.55    0.59
   6 -16  -1    0.70    0.60
   6 -16  -1    0.93    0.68
   6  16  -1    0.02    0.54
  -6  16   1    1.03    0.77
   4 -16  -1    4.56    0.89
  -4 -16   1    3.11    0.79
   4 -16  -1    2.57    0.80
  -4  16   1    5.73    1.04
   4  16  -1    2.31    0.74
  -4  16   1    2.96    0.85
   2 -16  -1    1.13    0.67
  -2 -16   1    0.03    0.57
  -2  16   1    1.21    0.67
   2  16  -1    1.49    0.70
  -2  16   1    0.09    0.66
   0 -16  -1    2.73    0.75
   0 -16   1    1.48    0.72
   0  16  -1    4.05    0.89
   0  16   1    3.18    0.79
   0  16  -1    1.74    0.71
   2 -16   1    0.98    0.62
  -2 -16  -1    0.64    0.64
  -2  16  -1    0.39    0.61
   2  16   1    1.56    0.71
  -2  16  -1    0.87    0.67
  -4 -16  -1    1.89    0.72
   4 -16   1    2.14    0.71
  -4  16  -1    1.19    0.69
  -4  16  -1    1.69    0.79
   4  16   1    1.31    0.63
  -6 -16  -1    0.11    0.58
   6 -16   1    1.43    0.69
  -6  16  -1    1.11    0.76
   8 -16   1    2.14    0.86
  -8 -16  -1    0.86    0.64
  -8  16  -1    0.29    0.68
 -10 -16  -1   -0.38    0.58
 -10  16  -1    0.63    0.77
 -12 -16  -1    0.37    0.59
 -12  16  -1   -0.43    0.78
 -11 -17   1    0.26    0.65
 -11  17   1    0.75    0.87
  -9 -17   1    0.21    0.67
   9 -17  -1    0.13    0.72
  -9  17   1    0.89    0.80
  -7 -17   1   -0.64    0.60
   7 -17  -1   -0.88    0.63
  -7  17   1   -0.29    0.65
  -5 -17   1    0.33    0.64
   5 -17  -1    0.71    0.76
  -5  17   1   -0.66    0.67
  -3 -17   1    0.17    0.63
   3 -17  -1    0.59    0.72
   3  17  -1    1.78    0.70
  -3  17   1    0.63    0.67
  -3  17   1    1.00    0.72
  -1 -17   1    0.76    0.71
   1 -17  -1    0.27    0.67
   1  17  -1    0.33    0.69
  -1  17   1    1.24    0.74
   1 -17   1    0.14    0.60
  -1 -17  -1    0.05    0.64
   1  17   1   -0.07    0.57
  -1  17  -1   -1.23    0.48
   3 -17   1    0.36    0.69
  -3 -17  -1    1.13    0.69
   3  17   1   -0.27    0.63
  -3  17  -1    0.29    0.71
   5 -17   1   -0.27    0.67
  -5 -17  -1   -0.59    0.58
  -5  17  -1    0.76    0.71
  -7 -17  -1    0.43    0.70
   7 -17   1    1.85    0.83
  -7  17  -1    0.50    0.79
  -9 -17  -1    1.39    0.75
  -9  17  -1    0.20    0.78
 -11 -17  -1    0.41    0.68
 -11  17  -1    0.61    0.88
 -10 -18   1   -0.97    0.61
 -10  18   1   -0.33    0.82
  -8 -18   1    0.00    0.66
   8 -18  -1   -1.25    0.70
  -8  18   1   -0.14    0.75
  -6 -18   1   -0.97    0.57
   6 -18  -1    0.21    0.75
  -6  18   1    0.21    0.77
  -4 -18   1    0.21    0.67
   4 -18  -1   -0.55    0.58
   2 -18  -1    0.82    0.75
  -2 -18   1    0.59    0.68
  -2  18   1   -0.48    0.61
   0 -18  -1    1.34    0.79
   0 -18   1    0.51    0.71
   0  18  -1   -0.36    0.63
   0  18   1   -0.36    0.61
   2 -18   1   -0.87    0.63
  -2 -18  -1   -0.35    0.66
   4 -18   1   -0.43    0.65
  -4 -18  -1    1.12    0.70
  -4  18  -1   -0.55    0.75
  -6 -18  -1   -0.23    0.64
   6 -18   1   -0.56    0.73
  -6  18  -1    0.53    0.82
  -8 -18  -1    0.03    0.71
  -8  18  -1    1.36    0.92
  -7 -19   1   -1.19    0.63
   7 -19  -1    0.09    0.72
  -7  19   1    0.55    0.87
  -5 -19   1    0.77    0.75
   5 -19  -1   -0.57    0.76
   3 -19  -1    0.77    0.78
  -3 -19   1   -0.12    0.76
   1 -19  -1   -0.62    0.71
  -1 -19   1   -0.26    0.71
   1 -19   1   -0.31    0.72
  -1 -19  -1    0.03    0.74
  -3 -19  -1    0.15    0.71
   3 -19   1   -0.42    0.73
  -5 -19  -1    0.59    0.72
   5 -19   1    1.19    0.86
 -22   0   2    0.00    0.37
 -20   0   2    0.09    0.33
 -18   0   2    0.60    0.33
 -16   0   2    0.10    0.27
 -14   0   2    1.04    0.24
 -14   0   2    1.28    0.28
 -14   0   2    0.90    0.18
 -12   0   2    2.42    0.29
 -12   0   2    2.56    0.26
 -12   0   2    2.53    0.24
 -12   0   2    2.94    0.30
  12   0  -2    2.55    0.24
 -10   0   2   51.36    1.72
  10   0  -2   52.02    1.77
  10   0  -2   53.11    1.76
 -10   0   2   53.24    1.72
 -10   0   2   51.25    1.77
 -10   0   2   51.74    1.76
   8   0  -2   39.81    1.40
  -8   0   2   42.46    1.35
  -8   0   2   40.10    1.35
  -8   0   2   39.52    1.39
   8   0  -2   42.14    1.40
  -8   0   2   38.95    1.40
  -6   0   2  958.43   28.65
  -6   0   2  948.39   28.71
  -6   0   2  991.02   29.79
   6   0  -2  941.68   28.70
   6   0  -2 1000.00   30.02
  -6   0   2  965.39   29.92
   6   0  -2  943.63   30.06
   4   0  -2  961.09   28.29
   4   0  -2  976.26   29.47
   4   0  -2  942.42   29.48
  -4   0   2  925.07   29.76
  -4   0   2  959.74   28.39
  -4   0   2  930.08   29.59
  -4   0   2  955.75   28.43
   2   0  -2  166.97    5.29
   2   0  -2  168.82    5.05
  -2   0   2  165.06    5.07
  -2   0   2  163.73    5.28
  -2   0   2  171.71    5.08
   2   0  -2  166.80    5.28
  -2   0   2  162.82    5.04
   2   0  -2  173.97    5.07
  -2   0   2  172.59    5.30
   2   0  -2  160.08    5.07
   0   0  -2  323.25    9.44
   0   0   2  312.85    9.36
   0   0  -2  318.16    9.35
   0   0  -2  307.02    9.82
   0   0   2  322.83    9.84
   0   0  -2  307.42    9.44
   0   0   2  313.43    9.83
   0   0   2  307.27    9.44
   0   0   2  319.00    9.44
  -2   0  -2  442.55   14.63
   2   0   2  456.86   13.44
  -2   0  -2  459.10   13.33
  -2   0  -2  447.73   13.45
   2   0   2  445.35   14.64
  -2   0  -2  441.93   13.44
  -2   0  -2  452.31   14.00
  -4   0  -2  268.91    8.30
  -4   0  -2  262.26    7.96
   4   0   2  261.26    8.30
  -4   0  -2  273.20    7.93
  -4   0  -2  259.49    8.77
  -4   0  -2  261.79    7.98
   4   0   2  256.96    8.77
  -6   0  -2   57.06    1.97
  -6   0  -2   58.86    1.90
   6   0   2   56.99    1.84
  -6   0  -2   55.94    1.91
   6   0   2   57.01    1.99
  -6   0  -2   57.49    2.26
   8   0   2   58.45    1.77
  -8   0  -2   54.56    1.92
  -8   0  -2   55.62    1.97
  -8   0  -2   57.50    1.90
   8   0   2   54.91    1.98
  10   0   2   27.52    1.08
 -10   0  -2   25.35    1.06
 -10   0  -2   25.20    1.05
 -10   0  -2   25.39    1.03
  10   0   2   24.74    1.05
  12   0   2    4.65    0.44
 -12   0  -2    4.18    0.40
 -12   0  -2    4.42    0.47
 -12   0  -2    4.19    0.42
  12   0   2    4.19    0.40
 -14   0  -2    1.24    0.36
 -14   0  -2    0.87    0.27
  14   0   2    1.73    0.32
  14   0   2    1.45    0.28
  16   0   2    0.38    0.22
 -16   0  -2    0.29    0.37
  16   0   2    0.50    0.22
 -18   0  -2   -0.32    0.39
 -20   0  -2   -0.06    0.44
 -23   1   2    0.42    0.43
 -21  -1   2    0.81    0.33
 -21   1   2    0.59    0.42
 -19  -1   2   -0.12    0.26
 -19   1   2   -0.09    0.36
  17  -1  -2    4.56    0.32
 -17  -1   2    5.06    0.44
 -17   1   2    5.57    0.57
  15  -1  -2    0.17    0.18
 -15  -1   2   -0.05    0.18
 -15  -1   2   -0.12    0.19
 -15   1   2    0.66    0.26
 -15   1   2   -0.07    0.19
 -15   1   2    0.24    0.28
 -13  -1   2   20.36    0.77
 -13  -1   2   19.59    0.77
  13  -1  -2   19.70    0.84
 -13   1   2   21.27    0.88
 -13   1   2   18.27    0.89
 -13   1   2   19.64    0.86
 -11  -1   2    4.36    0.29
 -11  -1   2    3.75    0.22
  11  -1  -2    4.56    0.36
 -11  -1   2    3.64    0.27
  11  -1  -2    3.48    0.35
 -11   1   2    4.07    0.37
 -11   1   2    4.17    0.36
 -11   1   2    3.76    0.36
 -11   1   2    4.14    0.35
  -9  -1   2   68.58    2.11
  -9  -1   2   66.49    2.17
   9  -1  -2   67.11    2.08
  -9  -1   2   65.88    2.18
  -9  -1   2   66.09    2.11
   9  -1  -2   68.97    2.29
   9  -1  -2   65.87    2.30
   9   1  -2   68.92    2.18
  -9   1   2   69.03    2.21
  -9   1   2   65.93    2.28
  -9   1   2   67.11    2.20
  -9   1   2   68.30    2.30
  -7  -1   2   50.64    1.66
  -7  -1   2   49.83    1.59
  -7  -1   2   50.47    1.59
  -7  -1   2   49.70    1.66
   7  -1  -2   49.86    1.75
   7  -1  -2   50.63    1.63
   7  -1  -2   50.43    1.75
   7   1  -2   51.19    1.66
  -7   1   2   50.95    1.75
  -7   1   2   52.11    1.69
  -7   1   2   49.68    1.74
  -7   1   2   49.51    1.67
   7   1  -2   50.12    1.72
   5  -1  -2  439.46   13.86
  -5  -1   2  437.75   13.20
  -5  -1   2  440.43   13.26
  -5  -1   2  449.82   13.80
  -5  -1   2  447.30   13.81
   5  -1  -2  453.85   13.87
  -5  -1   2  445.19   13.26
  -5   1   2  443.73   13.32
   5   1  -2  449.17   14.04
  -5   1   2  438.17   13.86
  -5   1   2  449.10   13.86
   5   1  -2  449.79   13.81
  -5   1   2  442.28   13.31
   5   1  -2  435.91   13.23
   5   1  -2  451.53   13.23
  -3  -1   2    4.40    0.28
   3  -1  -2    4.67    0.29
   3  -1  -2    4.46    0.29
  -3  -1   2    4.28    0.27
  -3  -1   2    4.79    0.28
  -3  -1   2    4.45    0.26
  -3  -1   2    4.69    0.27
   3  -1  -2    3.96    0.30
   3  -1  -2    4.28    0.27
  -3   1   2    4.56    0.29
  -3   1   2    4.48    0.29
  -3   1   2    4.34    0.29
   3   1  -2    4.56    0.27
   3   1  -2    4.78    0.29
   3   1  -2    4.32    0.25
  -3   1   2    4.18    0.30
   3   1  -2    4.42    0.26
   1  -1  -2    1.45    0.16
   1  -1  -2    0.97    0.14
   1  -1  -2    1.54    0.18
  -1  -1   2    1.04    0.16
   1  -1  -2    1.47    0.18
  -1  -1   2    1.27    0.16
   1  -1  -2    1.16    0.16
  -1  -1   2    1.21    0.17
  -1  -1   2    1.23    0.17
   1   1  -2    1.38    0.17
  -1   1   2    1.06    0.15
  -1   1   2    1.21    0.17
  -1   1   2    0.76    0.15
  -1   1   2    1.14    0.16
  -1   1   2    0.95    0.15
   1   1  -2    1.13    0.16
   1   1  -2    1.16    0.17
   1   1  -2    1.53    0.17
  -1  -1  -2   59.59    1.99
  -1  -1  -2   59.36    1.90
  -1  -1  -2   59.11    1.91
   1  -1   2   61.03    2.01
   1  -1   2   58.21    1.91
   1  -1   2   61.26    1.93
   1  -1   2   57.43    2.10
  -1  -1  -2   59.36    1.99
  -1  -1  -2   58.47    1.87
  -1   1  -2   58.68    1.92
  -1   1  -2   59.44    1.93
   1   1   2   59.26    1.99
   1   1   2   58.27    2.12
   1   1   2   56.81    1.89
   1   1   2   59.66    1.90
  -1   1  -2   60.79    1.92
   1   1   2   59.27    1.87
  -1   1  -2   60.39    2.01
  -3  -1  -2   11.37    0.49
   3  -1   2   11.81    0.53
  -3  -1  -2   12.61    0.53
  -3  -1  -2   12.24    0.51
   3  -1   2   10.87    0.62
  -3  -1  -2   12.04    0.52
   3   1   2   11.36    0.65
  -3   1  -2   12.13    0.55
   3   1   2   12.13    0.54
  -3   1  -2   10.87    0.52
  -3   1  -2   11.71    0.57
  -3   1  -2   10.98    0.63
   3   1   2   10.81    0.52
   5  -1   2    4.99    0.41
  -5  -1  -2    5.93    0.36
  -5  -1  -2    6.29    0.37
  -5  -1  -2    6.79    0.59
  -5  -1  -2    5.69    0.35
  -5  -1  -2    5.13    0.33
   5   1   2    5.66    0.36
  -5   1  -2    5.01    0.38
  -5   1  -2    5.64    0.52
   5   1   2    5.09    0.29
  -5   1  -2    5.89    0.39
   5   1   2    4.69    0.34
  -5   1  -2    5.26    0.41
  -7  -1  -2    2.50    0.30
  -7  -1  -2    2.14    0.26
  -7  -1  -2    1.98    0.25
  -7  -1  -2    2.25    0.25
   7  -1   2    2.22    0.24
   7  -1   2    2.12    0.30
   7   1   2    2.13    0.26
   7   1   2    1.69    0.24
  -7   1  -2    1.84    0.27
  -7   1  -2    1.55    0.27
  -7   1  -2    2.01    0.42
  -7   1  -2    2.06    0.31
  -9  -1  -2    6.56    0.43
  -9  -1  -2    6.78    0.46
   9  -1   2    7.21    0.52
   9  -1   2    6.42    0.37
  -9  -1  -2    7.28    0.44
   9   1   2    6.33    0.41
  -9   1  -2    6.86    0.53
  -9   1  -2    6.05    0.49
  -9   1  -2    6.59    0.50
  -9   1  -2    5.81    0.47
   9   1   2    6.28    0.42
 -11  -1  -2    4.18    0.37
  11  -1   2    5.43    0.51
 -11  -1  -2    5.01    0.41
 -11  -1  -2    4.40    0.42
  11   1   2    3.90    0.38
 -11   1  -2    5.37    0.47
 -11   1  -2    4.65    0.48
 -11   1  -2    4.65    0.45
  11   1   2    4.19    0.37
  13  -1   2    1.04    0.32
 -13  -1  -2    0.56    0.29
 -13  -1  -2    1.27    0.29
 -13  -1  -2    0.80    0.22
  13   1   2    1.11    0.24
 -13   1  -2    1.03    0.28
 -13   1  -2    0.97    0.36
  13   1   2    0.87    0.22
 -15  -1  -2    0.70    0.34
  15  -1   2    1.10    0.33
  15  -1   2    1.00    0.29
 -15   1  -2    1.29    0.42
  17  -1   2   -0.03    0.24
  17  -1   2   -0.04    0.26
 -17  -1  -2   -0.31    0.33
 -17   1  -2    0.44    0.42
 -19  -1  -2   -0.01    0.37
 -19   1  -2   -0.14    0.41
 -21  -1  -2    0.59    0.44
 -21   1  -2   -0.35    0.47
 -22   2   2   -0.34    0.44
 -20   2   2   -0.11    0.42
  18  -2  -2   -0.01    0.23
 -18   2   2   -0.65    0.33
  16  -2  -2   -0.11    0.23
 -16   2   2    0.13    0.34
 -16   2   2   -0.06    0.23
 -14  -2   2    0.64    0.16
 -14  -2   2    0.30    0.15
  14  -2  -2    0.47    0.23
 -14   2   2    0.26    0.30
 -14   2   2    0.15    0.22
 -14   2   2    0.70    0.28
  12  -2  -2    1.22    0.29
  12  -2  -2    0.57    0.23
 -12  -2   2    0.66    0.14
 -12   2   2    1.17    0.28
 -12   2   2    0.56    0.27
 -12   2   2    0.94    0.26
  10  -2  -2    2.90    0.25
  10  -2  -2    2.40    0.32
 -10  -2   2    2.22    0.18
  10  -2  -2    1.69    0.30
 -10  -2   2    2.68    0.32
 -10   2   2    1.89    0.29
 -10   2   2    2.65    0.33
 -10   2   2    2.70    0.33
 -10   2   2    2.63    0.34
  -8  -2   2    4.51    0.35
   8  -2  -2    4.36    0.33
  -8  -2   2    4.32    0.24
  -8  -2   2    3.83    0.23
   8  -2  -2    3.99    0.38
  -8  -2   2    4.32    0.24
   8  -2  -2    4.68    0.41
  -8  -2   2    4.35    0.23
   8   2  -2    3.95    0.22
  -8   2   2    4.85    0.39
  -8   2   2    3.67    0.37
  -8   2   2    4.21    0.38
  -8   2   2    4.98    0.40
  -6  -2   2    1.83    0.18
  -6  -2   2    1.73    0.18
   6  -2  -2    1.80    0.25
  -6  -2   2    1.97    0.17
  -6  -2   2    1.84    0.22
   6  -2  -2    2.54    0.29
  -6  -2   2    2.20    0.18
   6  -2  -2    2.03    0.25
   6   2  -2    1.86    0.18
   6   2  -2    1.88    0.24
  -6   2   2    1.81    0.25
  -6   2   2    1.54    0.24
  -6   2   2    2.47    0.28
  -6   2   2    1.33    0.24
   4  -2  -2    0.94    0.19
  -4  -2   2    1.56    0.17
  -4  -2   2    1.22    0.16
   4  -2  -2    1.45    0.22
  -4  -2   2    1.37    0.19
   4  -2  -2    1.39    0.22
  -4  -2   2    1.22    0.17
  -4   2   2    1.37    0.20
  -4   2   2    1.53    0.22
  -4   2   2    1.70    0.24
   4   2  -2    1.23    0.17
   4   2  -2    1.46    0.19
  -4   2   2    1.08    0.20
   4   2  -2    1.16    0.13
   4   2  -2    1.23    0.20
  -2  -2   2   90.29    2.83
  -2  -2   2   89.07    2.84
  -2  -2   2   94.59    2.97
   2  -2  -2   88.20    2.87
   2  -2  -2   91.30    3.00
   2  -2  -2   93.61    2.86
  -2  -2   2   92.85    2.85
   2  -2  -2   88.84    2.99
   2   2  -2   90.47    2.83
   2   2  -2   90.80    2.84
  -2   2   2   88.16    2.99
  -2   2   2   93.10    3.01
  -2   2   2   90.55    2.87
   2   2  -2   90.16    2.97
   2   2  -2   91.81    2.83
  -2   2   2   90.38    2.86
   0  -2  -2   55.76    1.86
   0  -2  -2   56.22    1.94
   0  -2   2   56.49    1.86
   0  -2  -2   55.76    1.85
   0  -2   2   58.18    1.96
   0  -2   2   58.40    1.88
   0  -2  -2   55.41    1.94
   0   2   2   56.96    1.86
   0   2  -2   56.93    1.87
   0   2   2   56.39    1.95
   0   2  -2   58.01    1.96
   0   2   2   58.82    1.86
   0   2   2   59.05    1.95
   0   2  -2   56.57    1.88
   0   2   2   56.02    1.82
   0   2  -2   58.69    1.87
  -2  -2  -2   43.26    1.51
  -2  -2  -2   41.74    1.43
  -2  -2  -2   43.60    1.50
   2  -2   2   43.44    1.56
   2  -2   2   42.81    1.59
  -2  -2  -2   43.53    1.38
  -2  -2  -2   44.41    1.66
   2  -2   2   40.12    1.46
  -2  -2  -2   43.19    1.44
  -2   2  -2   42.84    1.56
  -2   2  -2   41.17    1.49
   2   2   2   46.21    1.52
   2   2   2   43.49    1.66
   2   2   2   43.53    1.39
   2   2   2   44.11    1.51
  -2   2  -2   42.70    1.48
   2   2   2   42.82    1.43
  -4  -2  -2  107.44    3.21
  -4  -2  -2  106.10    3.42
  -4  -2  -2  105.02    3.27
  -4  -2  -2  102.94    3.41
   4  -2   2  108.02    3.33
  -4  -2  -2  104.56    3.28
  -4  -2  -2  107.82    3.74
   4  -2   2  105.03    3.67
  -4   2  -2  101.98    3.34
  -4   2  -2  105.84    3.66
  -4   2  -2  104.20    3.37
   4   2   2  106.87    3.42
  -4   2  -2  101.44    3.50
   4   2   2  105.03    3.74
   4   2   2  105.10    3.43
  -6  -2  -2   59.43    2.00
   6  -2   2   60.81    2.19
  -6  -2  -2   61.75    2.07
  -6  -2  -2   60.84    1.99
   6  -2   2   60.12    2.03
  -6  -2  -2   62.14    1.96
  -6  -2  -2   61.41    2.42
  -6   2  -2   64.88    2.37
  -6   2  -2   60.84    2.08
   6   2   2   62.66    2.08
  -6   2  -2   61.24    2.18
  -6   2  -2   61.88    2.12
   6   2   2   60.10    2.08
   6   2   2   61.27    1.89
  -8  -2  -2   42.79    1.52
  -8  -2  -2   45.28    1.57
  -8  -2  -2   45.04    1.51
   8  -2   2   45.99    1.73
   8  -2   2   45.42    1.55
  -8  -2  -2   42.80    1.51
  -8   2  -2   44.87    1.63
  -8   2  -2   45.46    1.68
   8   2   2   45.37    1.58
   8   2   2   44.43    1.58
  -8   2  -2   45.82    1.70
  -8   2  -2   43.96    1.71
 -10  -2  -2   16.39    0.70
  10  -2   2   16.72    0.87
 -10  -2  -2   15.39    0.72
  10  -2   2   17.84    0.70
 -10  -2  -2   15.33    0.70
 -10   2  -2   15.89    0.88
  10   2   2   16.25    0.70
  10   2   2   15.76    0.69
 -10   2  -2   14.66    0.82
 -10   2  -2   16.46    0.81
 -12  -2  -2   10.67    0.55
  12  -2   2   12.83    0.76
 -12  -2  -2   12.09    0.62
 -12  -2  -2   12.18    0.64
  12   2   2   11.06    0.53
  12   2   2   11.01    0.52
 -12   2  -2   11.12    0.70
 -12   2  -2   11.28    0.79
 -12   2  -2   10.30    0.69
 -14  -2  -2    2.83    0.39
  14  -2   2    2.52    0.45
 -14   2  -2    2.75    0.42
 -14   2  -2    2.94    0.51
  16  -2   2    0.72    0.34
 -16  -2  -2    0.01    0.31
 -16   2  -2    0.37    0.41
  18  -2   2    0.39    0.31
 -18  -2  -2    0.65    0.37
 -18   2  -2    0.39    0.45
 -20  -2  -2   -0.22    0.35
 -20   2  -2    0.12    0.45
 -23   3   2    1.21    0.58
 -21   3   2   -0.78    0.46
  19  -3  -2    0.01    0.28
 -19   3   2    0.70    0.47
  17  -3  -2    1.01    0.33
 -17   3   2    1.02    0.44
 -15  -3   2    0.80    0.28
  15  -3  -2    0.78    0.28
 -15   3   2    0.60    0.30
 -15   3   2    0.25    0.34
 -13  -3   2    1.97    0.30
  13  -3  -2    2.36    0.38
  13  -3  -2    1.83    0.36
 -13   3   2    1.53    0.35
 -13   3   2    2.15    0.37
 -13   3   2    1.49    0.39
  11  -3  -2   -0.03    0.23
 -11  -3   2    0.11    0.18
  11  -3  -2    0.21    0.24
 -11  -3   2    0.07    0.18
  11  -3  -2    0.01    0.17
 -11   3   2    0.39    0.26
 -11   3   2    0.06    0.23
 -11   3   2    0.37    0.21
 -11   3   2    0.36    0.24
  -9  -3   2   35.84    1.16
   9  -3  -2   35.73    1.23
  -9  -3   2   36.25    1.25
  -9  -3   2   34.80    1.16
   9  -3  -2   38.10    1.45
  -9  -3   2   35.94    1.18
  -9  -3   2   34.40    1.37
   9  -3  -2   35.06    1.44
  -9   3   2   35.81    1.38
  -9   3   2   36.98    1.45
  -9   3   2   38.30    1.39
  -9   3   2   35.02    1.44
  -7  -3   2   11.85    0.48
  -7  -3   2   11.17    0.50
  -7  -3   2   11.83    0.47
  -7  -3   2   10.61    0.46
   7  -3  -2   11.48    0.63
   7  -3  -2   11.19    0.63
   7  -3  -2   10.23    0.57
  -7  -3   2   11.07    0.58
  -7   3   2   11.04    0.61
   7   3  -2   10.79    0.47
  -7   3   2    9.85    0.61
  -7   3   2   11.04    0.60
  -7   3   2   10.14    0.62
   5  -3  -2    0.19    0.16
   5  -3  -2    0.60    0.20
  -5  -3   2    0.41    0.16
   5  -3  -2    0.36    0.18
  -5  -3   2    0.43    0.13
  -5  -3   2    0.57    0.14
  -5  -3   2    0.84    0.16
  -5  -3   2    0.48    0.18
   5   3  -2    0.38    0.15
   5   3  -2    0.31    0.11
  -5   3   2    0.44    0.19
   5   3  -2    0.39    0.18
  -5   3   2    0.25    0.18
   5   3  -2    0.21    0.13
  -5   3   2    0.23    0.17
  -5   3   2    0.43    0.19
  -3  -3   2    4.42    0.31
  -3  -3   2    4.46    0.32
   3  -3  -2    4.50    0.37
  -3  -3   2    4.79    0.39
   3  -3  -2    4.09    0.37
   3  -3  -2    3.82    0.36
  -3  -3   2    4.96    0.32
  -3  -3   2    4.27    0.33
  -3   3   2    4.91    0.40
   3   3  -2    4.38    0.32
  -3   3   2    3.66    0.34
   3   3  -2    4.21    0.30
  -3   3   2    4.39    0.38
  -3   3   2    4.82    0.39
   3   3  -2    4.02    0.36
   3   3  -2    4.06    0.33
  -1  -3   2  204.34    6.17
  -1  -3   2  203.03    6.19
   1  -3  -2  205.89    6.19
  -1  -3   2  201.38    6.44
   1  -3  -2  198.56    6.45
   1  -3  -2  206.81    6.19
   1  -3  -2  204.01    6.45
  -1   3   2  198.60    6.44
   1   3  -2  205.21    6.13
   1   3  -2  195.63    6.44
  -1   3   2  204.26    6.19
   1   3  -2  205.05    6.19
   1   3  -2  192.12    6.54
  -1  -3  -2   13.00    0.60
  -1  -3  -2   13.06    0.57
  -1  -3  -2   12.27    0.57
   1  -3   2   11.71    0.58
  -1  -3  -2   11.78    0.58
   1  -3   2   12.09    0.63
   1   3   2   12.24    0.56
  -1   3  -2   12.51    0.62
   1   3   2   12.02    0.52
   1   3   2   12.33    0.64
  -1   3  -2   13.00    0.64
   1   3   2   12.44    0.60
  -1   3  -2   12.32    0.61
  -3  -3  -2    0.53    0.16
  -3  -3  -2    0.33    0.15
  -3  -3  -2    0.37    0.20
  -3  -3  -2    0.17    0.13
   3  -3   2    0.40    0.18
   3  -3   2    0.64    0.21
  -3  -3  -2    0.47    0.16
   3  -3   2    0.88    0.21
  -3   3  -2    0.33    0.17
   3   3   2    0.52    0.17
  -3   3  -2    0.32    0.18
  -3   3  -2    0.40    0.18
   3   3   2    0.33    0.22
   3   3   2    0.48    0.17
  -3   3  -2    0.59    0.22
   3   3   2    0.28    0.12
  -5  -3  -2    2.43    0.19
  -5  -3  -2    2.39    0.26
  -5  -3  -2    1.98    0.24
  -5  -3  -2    2.45    0.26
   5  -3   2    1.90    0.28
  -5  -3  -2    3.50    0.45
  -5  -3  -2    1.89    0.24
  -5   3  -2    1.87    0.30
  -5   3  -2    1.71    0.30
   5   3   2    2.31    0.21
  -5   3  -2    2.35    0.34
  -5   3  -2    2.78    0.36
   5   3   2    1.63    0.23
   5   3   2    2.07    0.25
  -5   3  -2    2.64    0.33
   7  -3   2   23.73    1.08
  -7  -3  -2   23.50    0.92
  -7  -3  -2   23.89    0.90
   7  -3   2   22.55    0.95
  -7  -3  -2   23.49    0.81
  -7  -3  -2   23.11    0.88
  -7   3  -2   22.11    1.05
   7   3   2   23.77    0.92
   7   3   2   22.62    0.91
  -7   3  -2   23.31    1.06
  -7   3  -2   23.61    1.01
  -7   3  -2   23.69    1.08
  -7   3  -2   22.27    1.15
  -9  -3  -2    7.28    0.45
  -9  -3  -2    7.23    0.42
  -9  -3  -2    7.33    0.38
  -9  -3  -2    6.87    0.42
   9  -3   2    6.66    0.62
   9   3   2    7.27    0.42
   9   3   2    7.14    0.42
  -9   3  -2    7.66    0.59
  -9   3  -2    6.89    0.63
  -9   3  -2    7.24    0.62
  -9   3  -2    6.41    0.59
 -11  -3  -2    0.03    0.18
 -11  -3  -2    0.02    0.19
  11  -3   2    0.23    0.20
 -11  -3  -2    0.32    0.15
  11  -3   2    0.07    0.27
 -11  -3  -2    0.49    0.22
  11   3   2    0.01    0.14
 -11   3  -2    0.32    0.21
 -11   3  -2    0.22    0.27
 -11   3  -2    0.42    0.28
 -11   3  -2   -0.41    0.30
  11   3   2    0.09    0.15
  13  -3   2    1.21    0.39
 -13  -3  -2    0.83    0.27
 -13  -3  -2    1.13    0.25
 -13   3  -2    1.15    0.35
 -13   3  -2    0.75    0.25
 -13   3  -2    0.28    0.38
 -15  -3  -2    0.16    0.28
  15  -3   2   -0.07    0.32
 -15   3  -2   -0.27    0.37
 -17  -3  -2    0.45    0.32
 -17   3  -2   -0.11    0.45
 -19  -3  -2    0.15    0.33
 -19   3  -2    0.51    0.50
 -21   3  -2    0.34    0.57
 -22   4   2   -1.08    0.49
 -20   4   2   -0.17    0.48
 -18   4   2   -0.08    0.44
  16  -4  -2    0.46    0.34
 -16   4   2    0.00    0.39
  14  -4  -2   -0.17    0.28
  14  -4  -2    0.58    0.31
 -14  -4   2    0.56    0.22
 -14  -4   2    0.10    0.23
 -14   4   2    0.21    0.30
 -14   4   2    0.06    0.34
  12  -4  -2    1.82    0.30
 -12  -4   2    1.77    0.31
 -12  -4   2    1.46    0.25
  12  -4  -2    1.61    0.37
  12  -4  -2    1.03    0.33
 -12   4   2    0.88    0.34
 -12   4   2    1.24    0.38
 -12   4   2    1.48    0.35
  10  -4  -2    8.31    0.41
 -10  -4   2    7.52    0.42
  10  -4  -2    8.21    0.54
  10  -4  -2    9.69    0.64
 -10  -4   2    8.20    0.39
 -10  -4   2    7.97    0.39
 -10  -4   2    8.87    0.55
  10  -4  -2    6.88    0.64
 -10   4   2    7.82    0.66
 -10   4   2    7.55    0.63
 -10   4   2    7.62    0.62
 -10   4   2    8.43    0.63
  -8  -4   2    0.17    0.14
  -8  -4   2    0.21    0.16
  -8  -4   2    0.19    0.13
   8  -4  -2    0.36    0.22
   8  -4  -2    0.07    0.21
  -8  -4   2    0.13    0.14
   8  -4  -2    0.28    0.15
   8  -4  -2    0.08    0.23
  -8  -4   2    0.16    0.20
  -8   4   2    0.11    0.19
  -8   4   2    0.02    0.21
   8   4  -2    0.05    0.12
  -8   4   2   -0.09    0.21
   8   4  -2    0.28    0.14
  -8   4   2    0.25    0.23
  -6  -4   2    3.02    0.28
  -6  -4   2    2.53    0.34
   6  -4  -2    2.47    0.35
  -6  -4   2    2.25    0.25
  -6  -4   2    2.73    0.27
   6  -4  -2    2.96    0.36
   6  -4  -2    2.40    0.35
  -6  -4   2    2.61    0.26
  -6   4   2    1.99    0.32
  -6   4   2    2.59    0.35
   6   4  -2    2.69    0.27
  -6   4   2    2.31    0.35
   6   4  -2    2.15    0.25
  -6   4   2    3.39    0.40
   6   4  -2    2.52    0.26
   6   4  -2    2.57    0.20
  -4  -4   2    3.56    0.31
   4  -4  -2    2.86    0.35
   4  -4  -2    2.57    0.35
   4  -4  -2    3.60    0.40
  -4  -4   2    3.38    0.37
  -4  -4   2    3.42    0.32
  -4  -4   2    3.34    0.30
   4   4  -2    3.92    0.40
   4   4  -2    3.00    0.31
  -4   4   2    3.67    0.38
   4   4  -2    2.67    0.26
   4   4  -2    3.69    0.32
  -4   4   2    2.74    0.34
   4   4  -2    3.70    0.34
  -4   4   2    3.07    0.37
  -2  -4   2   29.59    1.17
  -2  -4   2   30.47    1.23
   2  -4  -2   28.71    1.21
  -2  -4   2   29.89    1.12
  -2  -4   2   29.86    1.13
   2  -4  -2   31.31    1.23
   2  -4  -2   31.64    1.17
   2   4  -2   28.23    1.12
  -2   4   2   28.79    1.21
  -2   4   2   29.58    1.22
  -2   4   2   30.93    1.17
   2   4  -2   30.95    1.11
   2   4  -2   30.82    1.23
   2   4  -2   30.23    1.19
   2   4  -2   30.19    1.18
   0  -4  -2   17.37    0.79
   0  -4   2   17.04    0.80
   0  -4  -2   17.97    0.76
   0  -4  -2   16.24    0.74
   0  -4  -2   17.42    0.79
   0  -4   2   16.42    0.74
   0   4  -2   15.87    0.79
   0   4   2   17.01    0.79
   0   4  -2   16.61    0.76
   0   4  -2   16.55    0.80
   0   4   2   16.16    0.74
   0   4  -2   16.79    0.80
   0   4   2   16.49    0.78
   0   4   2   17.56    0.78
   2  -4   2    4.17    0.42
  -2  -4  -2    4.00    0.35
   2  -4   2    4.49    0.31
  -2  -4  -2    3.84    0.35
  -2  -4  -2    3.79    0.36
   2  -4   2    4.47    0.41
  -2  -4  -2    4.70    0.44
  -2   4  -2    4.23    0.43
   2   4   2    3.67    0.33
   2   4   2    4.18    0.42
  -2   4  -2    3.18    0.36
   2   4   2    3.76    0.35
  -2   4  -2    3.30    0.39
  -2   4  -2    3.72    0.40
   2   4   2    3.93    0.38
  -4  -4  -2    5.95    0.55
  -4  -4  -2    6.34    0.40
   4  -4   2    5.35    0.50
  -4  -4  -2    4.80    0.40
  -4  -4  -2    4.95    0.40
  -4  -4  -2    5.56    0.40
   4  -4   2    6.60    0.47
  -4   4  -2    5.69    0.48
  -4   4  -2    5.34    0.49
  -4   4  -2    5.96    0.53
  -4   4  -2    5.74    0.46
   4   4   2    5.68    0.40
   4   4   2    5.74    0.36
  -4   4  -2    6.12    0.53
   4   4   2    5.68    0.28
   4   4   2    5.62    0.40
   6  -4   2   31.98    1.28
  -6  -4  -2   32.23    1.19
  -6  -4  -2   32.40    1.23
  -6  -4  -2   31.60    1.18
  -6  -4  -2   32.51    1.23
  -6   4  -2   33.75    1.43
  -6   4  -2   35.50    1.43
  -6   4  -2   34.52    1.34
  -6   4  -2   32.15    1.38
   6   4   2   32.12    1.22
   6   4   2   32.90    1.09
  -6   4  -2   32.58    1.37
   6   4   2   32.19    1.24
  -8  -4  -2   11.58    0.55
  -8  -4  -2   10.58    0.57
   8  -4   2   10.52    0.64
   8  -4   2   11.11    0.73
  -8  -4  -2   10.69    0.55
  -8   4  -2   10.70    0.68
  -8   4  -2    9.78    0.71
  -8   4  -2   11.28    0.76
   8   4   2   11.64    0.57
  -8   4  -2   10.33    0.73
  -8   4  -2   10.90    0.64
   8   4   2   11.15    0.56
  10  -4   2    0.17    0.28
 -10  -4  -2    0.19    0.16
  10  -4   2   -0.01    0.12
 -10  -4  -2    0.24    0.22
 -10  -4  -2    0.47    0.20
  10   4   2    0.26    0.17
 -10   4  -2    0.14    0.22
 -10   4  -2    0.89    0.38
 -10   4  -2    0.13    0.27
  10   4   2    0.25    0.17
 -10   4  -2    1.01    0.29
  12  -4   2    0.61    0.35
 -12  -4  -2    0.88    0.24
 -12  -4  -2    0.26    0.23
 -12   4  -2    0.61    0.41
 -12   4  -2    0.05    0.29
 -12   4  -2    0.48    0.25
  14  -4   2    1.19    0.44
 -14  -4  -2    0.19    0.28
 -14   4  -2    0.66    0.43
 -16  -4  -2    0.07    0.29
 -16   4  -2    0.11    0.47
 -18  -4  -2    0.18    0.30
 -18   4  -2    1.23    0.60
 -20   4  -2    0.81    0.62
 -23   5   2   -0.65    0.57
 -21   5   2   -0.47    0.55
 -19   5   2    0.40    0.54
 -17   5   2    0.03    0.43
 -15  -5   2    0.58    0.28
  15  -5  -2    0.89    0.40
  15  -5  -2    0.85    0.37
 -15   5   2    0.37    0.44
 -13  -5   2    1.80    0.24
  13  -5  -2    1.02    0.39
  13  -5  -2    1.27    0.37
 -13  -5   2    1.49    0.35
  13  -5  -2    1.53    0.32
 -13  -5   2    1.53    0.20
 -13   5   2    0.79    0.40
 -13   5   2    1.76    0.42
 -11  -5   2   -0.10    0.16
 -11  -5   2    0.10    0.16
 -11  -5   2    0.01    0.22
  11  -5  -2    0.27    0.24
  11  -5  -2    0.37    0.29
  11  -5  -2    0.17    0.29
 -11  -5   2   -0.16    0.14
 -11   5   2   -0.14    0.28
 -11   5   2   -0.33    0.23
  -9  -5   2    8.61    0.45
  -9  -5   2    7.60    0.59
   9  -5  -2    8.88    0.63
   9  -5  -2    5.28    0.58
  -9  -5   2    8.01    0.42
  -9  -5   2    7.52    0.45
  -9  -5   2    8.67    0.46
   9  -5  -2    8.51    0.50
   9  -5  -2    8.59    0.73
  -9   5   2    8.47    0.72
  -9   5   2    8.64    0.71
  -9   5   2    8.22    0.70
   9   5  -2    8.36    0.42
   9   5  -2    8.69    0.46
  -7  -5   2    3.98    0.35
   7  -5  -2    4.35    0.51
  -7  -5   2    4.31    0.35
  -7  -5   2    3.60    0.43
  -7  -5   2    4.21    0.33
   7  -5  -2    4.16    0.48
   7  -5  -2    3.84    0.45
  -7  -5   2    4.41    0.37
   7   5  -2    4.19    0.25
  -7   5   2    4.42    0.47
   7   5  -2    4.00    0.35
   7   5  -2    4.35    0.33
   7   5  -2    4.36    0.38
  -7   5   2    3.57    0.47
  -7   5   2    3.06    0.43
  -5  -5   2   31.35    1.34
  -5  -5   2   30.32    1.17
   5  -5  -2   31.14    1.29
  -5  -5   2   31.40    1.23
  -5  -5   2   32.98    1.19
   5  -5  -2   33.25    1.38
   5  -5  -2   31.68    1.37
  -5   5   2   31.12    1.30
  -5   5   2   31.35    1.36
  -5   5   2   31.15    1.36
   5   5  -2   30.48    1.23
   5   5  -2   32.31    1.14
   5   5  -2   30.59    1.23
   3  -5  -2    0.46    0.22
  -3  -5   2    0.04    0.17
  -3  -5   2    0.23    0.19
   3  -5  -2   -0.05    0.17
   3  -5  -2    0.08    0.19
  -3  -5   2   -0.03    0.16
  -3  -5   2    0.12    0.17
  -3   5   2    0.14    0.20
   3   5  -2    0.61    0.23
  -3   5   2   -0.02    0.20
   3   5  -2    0.20    0.19
  -3   5   2    0.05    0.20
   3   5  -2    0.14    0.18
   3   5  -2    0.15    0.18
   3   5  -2   -0.02    0.06
  -1  -5   2    4.34    0.45
   1  -5  -2    4.76    0.46
   1  -5  -2    4.04    0.44
  -1  -5   2    4.81    0.47
  -1  -5   2    5.44    0.46
   1  -5  -2    4.61    0.45
   1   5  -2    5.38    0.47
  -1   5   2    4.30    0.45
  -1   5   2    3.85    0.43
   1   5  -2    4.72    0.46
   1   5  -2    4.87    0.47
   1   5  -2    4.40    0.45
  -1   5   2    5.03    0.44
   1  -5   2    1.34    0.18
  -1  -5  -2    1.45    0.26
   1  -5   2    0.93    0.27
  -1  -5  -2    1.87    0.28
  -1  -5  -2    1.91    0.30
  -1  -5  -2    1.52    0.27
   1  -5   2    1.35    0.29
   1  -5   2    0.77    0.25
  -1   5  -2    1.12    0.27
   1   5   2    1.62    0.30
   1   5   2    0.78    0.24
  -1   5  -2    1.50    0.30
  -1   5  -2    1.09    0.29
   1   5   2    1.46    0.27
   1   5   2    1.74    0.29
  -1   5  -2    1.28    0.30
   3  -5   2    6.56    0.60
  -3  -5  -2    7.18    0.49
   3  -5   2    6.92    0.56
  -3  -5  -2    7.83    0.64
  -3  -5  -2    7.62    0.48
  -3  -5  -2    7.59    0.50
  -3  -5  -2    7.04    0.50
   3   5   2    7.50    0.51
   3   5   2    7.85    0.47
  -3   5  -2    7.69    0.63
   3   5   2    7.54    0.39
   3   5   2    7.32    0.56
   3   5   2    6.66    0.49
  -3   5  -2    7.58    0.63
  -3   5  -2    8.13    0.66
  -3   5  -2    8.49    0.57
  -5  -5  -2    2.59    0.32
  -5  -5  -2    3.23    0.34
   5  -5   2    3.23    0.40
  -5  -5  -2    2.51    0.31
  -5  -5  -2    3.35    0.34
   5  -5   2    2.33    0.39
  -5   5  -2    2.77    0.42
  -5   5  -2    2.91    0.39
  -5   5  -2    2.65    0.42
   5   5   2    3.71    0.31
  -5   5  -2    3.42    0.46
   5   5   2    2.31    0.31
   5   5   2    2.32    0.32
  -5   5  -2    4.00    0.42
  -7  -5  -2    0.52    0.20
  -7  -5  -2    0.64    0.23
   7  -5   2    0.20    0.18
   7  -5   2    0.30    0.25
  -7  -5  -2    0.94    0.23
  -7  -5  -2    0.86    0.21
  -7   5  -2    0.91    0.29
   7   5   2    0.30    0.21
  -7   5  -2    0.53    0.25
   7   5   2    0.51    0.20
  -7   5  -2    0.85    0.31
  -7   5  -2    0.93    0.30
  -7   5  -2    0.29    0.31
  -9  -5  -2    0.31    0.19
   9  -5   2    0.72    0.34
  -9  -5  -2    0.28    0.22
   9  -5   2    0.38    0.27
  -9  -5  -2    0.60    0.21
   9   5   2    0.12    0.19
  -9   5  -2    0.52    0.37
   9   5   2    0.48    0.20
  -9   5  -2   -0.01    0.24
  -9   5  -2    0.23    0.24
 -11  -5  -2    2.05    0.32
  11  -5   2    1.97    0.37
  11  -5   2    1.61    0.43
 -11  -5  -2    1.89    0.25
 -11  -5  -2    2.07    0.29
 -11   5  -2    2.14    0.44
  11   5   2    1.77    0.24
  11   5   2    1.88    0.23
 -11   5  -2    2.36    0.38
 -11   5  -2    1.98    0.52
  13  -5   2    0.06    0.36
 -13  -5  -2    0.19    0.25
 -13   5  -2   -0.68    0.39
 -15  -5  -2    0.70    0.29
 -15   5  -2   -0.48    0.44
 -17  -5  -2    0.52    0.30
 -17   5  -2   -0.46    0.48
 -19   5  -2   -0.76    0.51
 -22   6   2    0.58    0.61
 -20   6   2   -0.58    0.56
 -18   6   2   -0.29    0.50
 -16  -6   2    1.14    0.36
 -16   6   2    0.54    0.49
 -14  -6   2    0.14    0.19
 -14  -6   2   -0.05    0.27
 -14  -6   2    0.08    0.19
  14  -6  -2    0.34    0.35
  14  -6  -2   -0.20    0.33
 -14   6   2    0.06    0.34
 -14   6   2   -0.09    0.41
 -12  -6   2    0.18    0.29
  12  -6  -2    0.82    0.38
 -12  -6   2    0.57    0.22
 -12  -6   2    0.40    0.21
  12  -6  -2    0.70    0.31
  12  -6  -2    0.07    0.31
 -12   6   2    1.24    0.39
 -12   6   2    0.29    0.38
 -10  -6   2   14.50    0.66
  10  -6  -2   14.30    0.92
  10  -6  -2   14.06    0.73
 -10  -6   2   13.38    0.66
  10  -6  -2   15.65    0.88
 -10  -6   2   13.67    0.85
 -10   6   2   13.55    0.89
  10   6  -2   12.79    0.60
 -10   6   2   13.20    0.89
 -10   6   2   12.90    0.90
  10   6  -2   13.39    0.63
   8  -6  -2    9.62    0.80
  -8  -6   2    7.23    0.49
  -8  -6   2    8.75    0.66
   8  -6  -2    8.28    0.69
  -8  -6   2    7.27    0.50
  -8  -6   2    7.66    0.50
   8  -6  -2    8.03    0.72
   8  -6  -2    8.83    0.57
   8   6  -2    7.97    0.53
  -8   6   2    8.70    0.74
  -8   6   2    7.20    0.69
   8   6  -2    8.30    0.43
   8   6  -2    8.79    0.51
  -8   6   2    7.19    0.69
   6  -6  -2   37.30    1.64
  -6  -6   2   37.15    1.62
  -6  -6   2   35.78    1.46
  -6  -6   2   39.14    1.42
  -6  -6   2   39.24    1.43
   6  -6  -2   38.36    1.64
   6  -6  -2   40.00    1.56
   6   6  -2   38.65    1.34
  -6   6   2   37.25    1.64
   6   6  -2   36.95    1.48
  -6   6   2   40.03    1.65
   6   6  -2   37.78    1.47
   6   6  -2   38.21    1.35
  -6   6   2   37.44    1.57
  -4  -6   2   13.21    0.71
  -4  -6   2   14.12    0.72
   4  -6  -2   12.97    0.79
   4  -6  -2   14.31    0.79
  -4  -6   2   13.85    0.71
   4  -6  -2   11.54    0.78
  -4  -6   2   13.25    0.79
  -4   6   2   10.99    0.75
   4   6  -2   12.67    0.72
  -4   6   2   13.97    0.81
   4   6  -2   12.80    0.68
   4   6  -2   11.50    0.71
  -4   6   2   13.20    0.81
  -2  -6   2   51.92    1.93
  -2  -6   2   50.73    2.08
   2  -6  -2   57.61    2.10
   2  -6  -2   56.02    1.98
   2  -6  -2   54.53    2.08
  -2  -6   2   55.44    2.05
   2   6  -2   53.73    2.04
   2   6  -2   54.60    2.05
   2   6  -2   53.53    2.10
  -2   6   2   50.03    2.06
  -2   6   2   55.74    2.09
   2   6  -2   53.40    1.94
  -2   6   2   54.77    1.99
   0  -6   2    8.44    0.60
   0  -6  -2    7.59    0.59
   0  -6   2    8.42    0.60
   0  -6  -2    8.42    0.58
   0  -6   2    7.55    0.54
   0  -6  -2    7.82    0.58
   0   6  -2    7.74    0.62
   0   6  -2    6.46    0.59
   0   6  -2    7.49    0.64
   0   6   2    7.53    0.53
   0   6   2    8.22    0.59
   0   6   2    7.56    0.51
   0   6   2    7.40    0.63
  -2  -6  -2    0.29    0.23
   2  -6   2    0.09    0.23
  -2  -6  -2    0.10    0.20
  -2  -6  -2    0.36    0.21
  -2  -6  -2    0.11    0.21
   2  -6   2   -0.03    0.24
   2  -6   2    0.19    0.23
   2  -6   2    0.45    0.13
  -2  -6  -2   -0.12    0.18
  -2   6  -2    0.38    0.24
   2   6   2    0.00    0.07
   2   6   2    0.41    0.24
  -2   6  -2   -0.05    0.25
   2   6   2    0.37    0.22
   2   6   2    0.43    0.21
  -2   6  -2    0.82    0.29
  -2   6  -2    0.11    0.22
  -4  -6  -2    4.17    0.42
  -4  -6  -2    5.10    0.47
  -4  -6  -2    4.19    0.51
   4  -6   2    3.91    0.48
   4  -6   2    4.60    0.54
  -4  -6  -2    4.03    0.42
  -4  -6  -2    4.16    0.42
   4   6   2    4.59    0.44
   4   6   2    2.39    0.30
  -4   6  -2    4.42    0.50
  -4   6  -2    3.79    0.49
  -4   6  -2    4.29    0.52
  -4   6  -2    4.78    0.56
   4   6   2    4.70    0.47
   4   6   2    4.65    0.30
  -6  -6  -2   20.21    0.89
  -6  -6  -2   19.29    0.90
   6  -6   2   19.76    0.98
   6  -6   2   18.85    1.06
  -6  -6  -2   17.48    0.86
  -6   6  -2   19.95    0.99
   6   6   2   18.72    0.88
  -6   6  -2   18.45    1.03
  -6   6  -2   17.32    1.03
   6   6   2   18.88    0.90
   6   6   2   19.24    0.78
  -6   6  -2   19.33    1.09
  -6   6  -2   17.27    0.91
   8  -6   2   21.42    1.04
  -8  -6  -2   21.65    0.95
   8  -6   2   23.25    1.21
  -8  -6  -2   22.57    0.95
  -8  -6  -2   20.39    0.90
   8   6   2   20.10    0.91
  -8   6  -2   19.70    1.14
  -8   6  -2   22.26    1.16
   8   6   2   18.99    0.92
  -8   6  -2   20.95    1.19
  -8   6  -2   19.80    1.07
  -8   6  -2   21.38    1.05
 -10  -6  -2   -0.05    0.24
  10  -6   2   -0.08    0.27
  10  -6   2    0.34    0.30
 -10  -6  -2    0.10    0.19
 -10  -6  -2    0.26    0.22
 -10   6  -2    0.37    0.27
 -10   6  -2   -0.09    0.37
 -10   6  -2   -0.17    0.28
  10   6   2    0.20    0.20
  10   6   2    0.00    0.19
  12  -6   2    1.63    0.47
 -12  -6  -2    1.48    0.34
 -12   6  -2    1.89    0.37
 -12   6  -2    1.99    0.56
  12   6   2    1.56    0.20
 -14  -6  -2    0.01    0.29
 -14   6  -2    0.05    0.49
 -16  -6  -2    0.17    0.29
 -16   6  -2    0.19    0.55
 -18  -6  -2    0.02    0.31
 -18   6  -2    0.59    0.63
 -20   6  -2   -0.18    0.64
 -21   7   2   -0.89    0.61
 -19   7   2    0.98    0.62
 -17   7   2    0.33    0.54
 -15  -7   2    0.51    0.24
  15  -7  -2    0.38    0.45
 -15  -7   2    0.60    0.35
 -15   7   2   -0.56    0.45
 -13  -7   2    0.69    0.26
  13  -7  -2    0.54    0.40
 -13  -7   2    0.33    0.24
  13  -7  -2    0.26    0.35
 -13  -7   2    0.48    0.33
 -13   7   2   -0.14    0.40
 -13   7   2    0.76    0.41
 -11  -7   2    4.71    0.44
  11  -7  -2    6.52    0.66
  11  -7  -2    3.46    0.61
  11  -7  -2    4.72    0.48
 -11  -7   2    5.44    0.45
 -11  -7   2    4.20    0.56
 -11   7   2    4.05    0.63
 -11   7   2    4.94    0.66
  11   7  -2    5.58    0.41
  11   7  -2    4.74    0.38
  -9  -7   2   39.94    1.53
  -9  -7   2   43.41    1.55
   9  -7  -2   41.46    1.69
  -9  -7   2   41.00    1.81
   9  -7  -2   41.73    1.87
   9  -7  -2   41.18    1.72
   9  -7  -2   41.24    1.85
   9   7  -2   40.30    1.56
  -9   7   2   42.55    1.86
   9   7  -2   40.73    1.40
  -9   7   2   43.85    1.88
   9   7  -2   41.09    1.59
  -9   7   2   41.04    1.79
   7  -7  -2    0.05    0.27
  -7  -7   2    0.67    0.25
  -7  -7   2    0.56    0.26
   7  -7  -2    0.41    0.26
  -7  -7   2    0.68    0.32
  -7  -7   2    0.65    0.25
   7  -7  -2    0.11    0.29
   7  -7  -2    0.37    0.30
   7   7  -2    0.61    0.25
  -7   7   2    0.28    0.32
   7   7  -2    0.73    0.22
  -7   7   2    0.38    0.30
   7   7  -2    0.41    0.19
   7   7  -2    0.64    0.26
  -7   7   2    0.35    0.34
  -5  -7   2   54.74    2.30
  -5  -7   2   58.51    2.08
   5  -7  -2   59.07    2.32
  -5  -7   2   58.87    2.17
  -5  -7   2   57.49    2.08
   5  -7  -2   57.95    2.31
   5  -7  -2   58.54    2.19
   5   7  -2   54.46    2.15
  -5   7   2   58.07    2.29
  -5   7   2   59.49    2.32
   5   7  -2   58.67    2.17
   5   7  -2   57.51    2.02
  -5   7   2   59.28    2.21
  -3  -7   2    0.25    0.25
   3  -7  -2    0.24    0.24
  -3  -7   2    0.14    0.26
  -3  -7   2    0.23    0.25
   3  -7  -2    0.19    0.24
   3  -7  -2    0.43    0.27
  -3   7   2    0.62    0.30
  -3   7   2    0.38    0.28
   3   7  -2   -0.41    0.18
  -3   7   2    0.39    0.29
   3   7  -2    0.13    0.23
   3   7  -2    0.22    0.22
   1  -7  -2  152.03    4.92
  -1  -7   2  146.27    4.89
   1  -7  -2  156.61    5.16
  -1  -7   2  150.53    5.13
  -1  -7   2  152.11    5.24
   1  -7  -2  152.22    5.14
  -1   7   2  155.69    5.11
   1   7  -2  152.39    5.13
   1   7  -2  150.41    5.14
   1   7  -2  146.63    5.21
  -1   7   2  155.20    4.92
   1   7  -2  149.56    4.91
  -1   7   2  150.45    5.16
  -1   7   2  151.04    5.14
   1  -7   2    9.88    0.73
  -1  -7  -2   12.02    0.72
  -1  -7  -2   11.60    0.72
  -1  -7  -2   10.78    0.73
   1  -7   2   11.44    0.77
   1  -7   2   12.57    0.78
   1   7   2   10.74    0.69
  -1   7  -2   13.28    0.81
   1   7   2   11.36    0.66
   1   7   2   10.74    0.73
  -1   7  -2   11.23    0.78
  -1   7  -2   10.41    0.76
   1   7   2   11.56    0.75
  -1   7  -2   11.09    0.76
   3  -7   2   15.38    0.90
   3  -7   2   16.96    0.98
  -3  -7  -2   15.86    0.85
  -3  -7  -2   16.01    0.86
  -3  -7  -2   14.50    0.88
  -3  -7  -2   15.80    0.86
  -3  -7  -2   16.92    0.86
  -3   7  -2   16.19    0.94
   3   7   2   15.84    0.87
  -3   7  -2   16.19    0.97
   3   7   2   15.31    0.80
  -3   7  -2   15.89    0.96
  -3   7  -2   15.72    0.93
   3   7   2   16.17    0.89
  -5  -7  -2   10.05    0.69
  -5  -7  -2   12.18    0.71
   5  -7   2   11.78    0.81
   5  -7   2   11.42    0.84
  -5  -7  -2   12.66    0.71
  -5  -7  -2   10.67    0.69
   5   7   2   11.77    0.72
  -5   7  -2   12.13    0.78
  -5   7  -2    9.94    0.87
  -5   7  -2   11.26    0.93
   5   7   2   11.36    0.49
   5   7   2   11.98    0.72
  -5   7  -2   11.31    0.92
   7  -7   2   78.90    2.78
  -7  -7  -2   76.21    2.72
  -7  -7  -2   75.27    2.63
   7  -7   2   76.20    2.99
  -7   7  -2   80.90    2.90
   7   7   2   77.43    2.48
  -7   7  -2   77.73    2.90
  -7   7  -2   77.04    2.81
   7   7   2   76.16    2.75
  -7   7  -2   77.85    2.97
   7   7   2   75.42    2.71
  -7   7  -2   73.66    2.95
  -9  -7  -2    0.98    0.28
  -9  -7  -2    1.37    0.30
   9  -7   2    1.58    0.41
  -9  -7  -2    1.08    0.32
   9  -7   2    0.59    0.38
   9   7   2    0.95    0.27
   9   7   2    0.93    0.28
  -9   7  -2    1.59    0.38
  -9   7  -2    0.44    0.42
  -9   7  -2    0.86    0.37
 -11  -7  -2    5.90    0.53
 -11  -7  -2    6.30    0.48
  11  -7   2    5.20    0.72
  11   7   2    6.16    0.47
 -11   7  -2    6.14    0.74
 -11   7  -2    6.78    0.64
 -11   7  -2    5.99    0.79
  11   7   2    6.40    0.46
 -13  -7  -2    0.57    0.32
 -13   7  -2    0.28    0.47
 -15  -7  -2    1.11    0.35
 -15   7  -2    0.82    0.61
 -17  -7  -2   -0.02    0.31
 -17   7  -2   -0.19    0.59
 -19   7  -2    0.16    0.67
 -22   8   2   -0.08    0.72
 -20   8   2    0.20    0.67
 -18   8   2    0.92    0.61
 -16  -8   2    1.61    0.33
 -16  -8   2    1.90    0.47
 -16   8   2    2.22    0.66
  14  -8  -2    1.66    0.52
 -14  -8   2    1.60    0.33
 -14  -8   2    0.78    0.39
 -14   8   2    1.33    0.60
  12  -8  -2    3.83    0.57
 -12  -8   2    3.14    0.41
  12  -8  -2    3.71    0.67
  12  -8  -2    3.42    0.46
 -12  -8   2    3.14    0.54
  12   8  -2    3.48    0.36
 -12   8   2    3.92    0.69
  12   8  -2    3.80    0.35
 -12   8   2    3.39    0.61
  10  -8  -2   15.93    1.12
  10  -8  -2   15.97    1.01
 -10  -8   2   16.08    0.83
 -10  -8   2   15.00    0.99
 -10  -8   2   14.99    0.83
  10  -8  -2   16.21    0.91
  10  -8  -2   16.78    1.10
 -10   8   2   15.70    1.07
  10   8  -2   15.35    0.82
  10   8  -2   15.88    0.80
 -10   8   2   16.92    1.10
  -8  -8   2   21.28    1.19
  -8  -8   2   21.26    1.03
  -8  -8   2   20.64    0.99
   8  -8  -2   20.89    1.11
   8  -8  -2   22.50    1.18
   8  -8  -2   23.23    1.26
   8  -8  -2   22.04    1.26
   8   8  -2   21.01    1.05
   8   8  -2   21.48    0.87
   8   8  -2   20.00    0.86
  -8   8   2   19.43    1.22
  -8   8   2   21.26    1.20
  -8   8   2   21.15    1.24
   8   8  -2   22.10    1.03
  -6  -8   2   18.58    0.90
  -6  -8   2   14.76    0.86
   6  -8  -2   18.05    1.08
  -6  -8   2   16.01    1.01
   6  -8  -2   16.59    1.03
  -6  -8   2   17.76    0.92
   6  -8  -2   18.83    1.05
  -6   8   2   16.44    1.02
  -6   8   2   15.50    1.02
   6   8  -2   15.44    0.80
   6   8  -2   17.08    0.91
  -6   8   2   18.33    1.11
   6   8  -2   15.57    0.92
   4  -8  -2    9.63    0.83
  -4  -8   2    7.65    0.75
   4  -8  -2    7.97    0.78
  -4  -8   2    9.13    0.69
   4  -8  -2   10.10    0.73
  -4  -8   2    9.83    0.70
   4   8  -2    9.18    0.64
  -4   8   2   10.68    0.87
  -4   8   2    8.90    0.77
   4   8  -2   10.02    0.70
   2  -8  -2   70.94    2.50
  -2  -8   2   66.74    2.56
  -2  -8   2   66.27    2.65
  -2  -8   2   68.88    2.46
   2  -8  -2   71.40    2.64
   2  -8  -2   63.14    2.59
  -2   8   2   67.22    2.37
  -2   8   2   70.14    2.63
   2   8  -2   64.26    2.55
  -2   8   2   66.83    2.49
   2   8  -2   63.24    2.55
   2   8  -2   67.27    2.44
   0  -8  -2   34.68    1.55
   0  -8  -2   32.33    1.54
   0  -8   2   34.60    1.57
   0  -8   2   35.59    1.49
   0  -8   2   35.45    1.60
   0  -8  -2   32.00    1.46
   0   8   2   35.70    1.48
   0   8   2   35.42    1.55
   0   8  -2   34.07    1.57
   0   8   2   33.51    1.37
   0   8  -2   36.55    1.60
   0   8   2   32.89    1.56
   0   8  -2   33.62    1.48
   2  -8   2    5.03    0.61
   2  -8   2    5.14    0.62
   2  -8   2    4.80    0.56
  -2  -8  -2    5.08    0.54
  -2  -8  -2    4.40    0.52
  -2  -8  -2    4.58    0.55
   2   8   2    5.96    0.60
  -2   8  -2    5.76    0.66
   2   8   2    4.36    0.54
  -2   8  -2    5.14    0.60
  -2   8  -2    4.69    0.59
   2   8   2    5.03    0.52
  -2   8  -2    4.86    0.61
   4  -8   2    0.18    0.31
  -4  -8  -2   -0.11    0.22
   4  -8   2   -0.29    0.30
  -4  -8  -2    0.44    0.31
  -4  -8  -2    0.52    0.28
  -4  -8  -2    0.23    0.23
  -4   8  -2   -0.13    0.33
  -4   8  -2    0.03    0.31
   4   8   2    0.38    0.25
   4   8   2    0.38    0.27
  -4   8  -2    0.47    0.31
  -4   8  -2   -0.08    0.25
   4   8   2    0.26    0.27
   6  -8   2   26.36    1.32
  -6  -8  -2   26.76    1.18
  -6  -8  -2   23.26    1.16
  -6  -8  -2   27.08    1.22
   6  -8   2   26.48    1.40
  -6   8  -2   24.99    1.38
  -6   8  -2   24.88    1.28
  -6   8  -2   26.24    1.37
   6   8   2   26.78    1.21
   6   8   2   25.50    1.08
   6   8   2   26.20    1.24
  -6   8  -2   25.84    1.38
   8  -8   2    7.63    0.76
   8  -8   2    8.22    0.87
  -8  -8  -2    9.68    0.71
  -8  -8  -2    6.90    0.62
  -8   8  -2    8.05    0.65
  -8   8  -2    8.52    0.77
  -8   8  -2    6.97    0.81
  -8   8  -2    7.37    0.81
   8   8   2    8.10    0.65
   8   8   2    6.63    0.61
  10  -8   2    5.35    0.67
 -10  -8  -2    3.47    0.48
  10  -8   2    3.84    0.65
 -10  -8  -2    3.62    0.44
  10   8   2    3.68    0.42
  10   8   2    4.21    0.46
 -10   8  -2    3.40    0.68
 -10   8  -2    3.49    0.63
 -12  -8  -2    0.87    0.37
 -12   8  -2    1.45    0.58
  12   8   2    1.00    0.27
  12   8   2    1.00    0.26
 -14  -8  -2    2.24    0.42
 -14   8  -2    2.21    0.72
 -16  -8  -2    0.16    0.34
 -16   8  -2    0.12    0.63
 -18  -8  -2    0.71    0.36
 -18   8  -2    0.76    0.72
 -21   9   2    0.42    0.71
 -19   9   2    0.64    0.69
 -17  -9   2    0.11    0.30
 -17   9   2    0.20    0.61
  15  -9  -2    1.42    0.57
 -15  -9   2    0.33    0.40
 -15  -9   2    1.77    0.37
 -15   9   2    0.98    0.58
  13  -9  -2    2.98    0.66
 -13  -9   2    3.05    0.58
 -13  -9   2    3.05    0.45
  13   9  -2    3.18    0.34
 -13   9   2    2.23    0.65
  13   9  -2    2.99    0.35
  11  -9  -2    0.97    0.46
  11  -9  -2    1.90    0.57
  11  -9  -2    1.74    0.51
  11  -9  -2    1.25    0.38
 -11  -9   2    1.40    0.39
 -11  -9   2    1.83    0.50
 -11   9   2    0.94    0.43
  11   9  -2    1.59    0.36
 -11   9   2    2.18    0.60
  11   9  -2    1.04    0.32
   9  -9  -2    4.77    0.70
  -9  -9   2    5.15    0.56
  -9  -9   2    5.71    0.60
   9  -9  -2    5.73    0.77
  -9  -9   2    5.22    0.69
   9  -9  -2    5.45    0.69
   9  -9  -2    4.94    0.60
  -9   9   2    5.46    0.75
   9   9  -2    5.55    0.58
  -9   9   2    5.04    0.70
   9   9  -2    4.96    0.54
   7  -9  -2    0.28    0.38
  -7  -9   2    0.54    0.35
   7  -9  -2    0.45    0.33
   7  -9  -2    0.37    0.39
   7  -9  -2    0.29    0.32
  -7  -9   2   -0.01    0.31
  -7  -9   2    0.05    0.28
   7   9  -2    0.06    0.26
  -7   9   2    0.43    0.34
  -7   9   2    0.19    0.38
  -7   9   2   -0.19    0.31
   7   9  -2   -0.05    0.15
   7   9  -2    0.33    0.29
  -5  -9   2   19.13    1.07
  -5  -9   2   20.05    1.06
   5  -9  -2   21.55    1.23
   5  -9  -2   18.99    1.11
   5  -9  -2   19.16    1.18
  -5  -9   2   20.77    1.20
  -5   9   2   21.43    1.22
   5   9  -2   17.89    1.06
   5   9  -2   20.43    1.11
  -5   9   2   18.13    1.16
   5   9  -2   21.76    1.04
  -5   9   2   20.37    1.17
  -3  -9   2    1.86    0.42
   3  -9  -2    2.17    0.46
  -3  -9   2    1.42    0.43
   3  -9  -2    1.35    0.40
   3  -9  -2    2.23    0.46
  -3  -9   2    1.17    0.39
  -3   9   2    2.18    0.48
   3   9  -2    1.40    0.37
  -3   9   2    1.83    0.43
  -3   9   2    1.41    0.23
   3   9  -2    1.54    0.42
  -3   9   2    1.07    0.40
   3   9  -2    1.56    0.39
   1  -9  -2   47.64    2.04
   1  -9  -2   47.74    2.04
  -1  -9   2   47.32    1.93
   1  -9  -2   46.16    1.93
  -1  -9   2   51.27    2.06
  -1  -9   2   47.94    2.09
   1   9  -2   47.17    2.03
   1   9  -2   45.86    2.01
  -1   9   2   48.24    2.06
  -1   9   2   45.65    2.05
   1   9  -2   48.81    1.94
  -1   9   2   49.47    1.96
  -1   9   2   47.30    1.78
   1  -9   2   -0.28    0.28
  -1  -9  -2    0.29    0.30
   1  -9   2    0.54    0.33
  -1  -9  -2    0.34    0.29
   1  -9   2    0.52    0.36
  -1  -9  -2    0.78    0.35
   1   9   2    0.31    0.29
  -1   9  -2    0.46    0.33
  -1   9  -2   -0.33    0.31
  -1   9  -2    0.72    0.34
   1   9   2    0.19    0.33
   1   9   2    0.24    0.31
   3  -9   2   69.38    2.65
  -3  -9  -2   69.52    2.57
  -3  -9  -2   68.19    2.65
   3  -9   2   68.52    2.76
  -3  -9  -2   70.42    2.69
   3  -9   2   73.56    2.83
   3   9   2   69.31    2.53
  -3   9  -2   70.66    2.82
  -3   9  -2   65.82    2.66
   3   9   2   71.40    2.71
  -3   9  -2   69.46    2.78
   5  -9   2    1.66    0.48
  -5  -9  -2    1.02    0.37
   5  -9   2    1.96    0.49
  -5  -9  -2    1.94    0.40
   5   9   2    1.73    0.40
  -5   9  -2    1.66    0.48
   5   9   2    2.09    0.36
   5   9   2    2.10    0.44
  -5   9  -2    2.86    0.58
  -5   9  -2    1.22    0.44
   7  -9   2   40.27    1.95
   7  -9   2   44.56    1.87
  -7  -9  -2   40.13    1.72
  -7  -9  -2   42.99    1.71
  -7   9  -2   42.91    1.97
   7   9   2   40.25    1.72
   7   9   2   39.70    1.74
  -7   9  -2   39.27    1.94
  -9  -9  -2    3.31    0.51
   9  -9   2    3.84    0.64
  -9  -9  -2    2.47    0.43
  -9   9  -2    2.07    0.63
   9   9   2    2.77    0.44
   9   9   2    1.93    0.40
  -9   9  -2    2.05    0.54
 -11  -9  -2   11.63    0.81
 -11   9  -2   11.68    1.16
  11   9   2   12.23    0.76
  11   9   2   12.11    0.72
 -13  -9  -2    2.08    0.45
 -13   9  -2    2.26    0.69
  13   9   2    2.38    0.33
  13   9   2    2.57    0.31
 -15  -9  -2    1.67    0.44
 -15   9  -2    1.85    0.73
 -17  -9  -2    0.09    0.38
 -17   9  -2   -0.21    0.61
 -19   9  -2    0.94    0.75
 -20  10   2   -0.09    0.70
 -18 -10   2    1.77    0.39
 -18  10   2    1.94    0.80
 -16 -10   2    0.30    0.46
 -16 -10   2    0.94    0.38
 -16  10   2    2.72    0.74
  14 -10  -2    3.80    0.75
 -14 -10   2    3.97    0.53
 -14 -10   2    3.34    0.64
 -14  10   2    2.82    0.72
  14  10  -2    3.19    0.34
  14  10  -2    2.72    0.32
 -12 -10   2    5.87    0.63
  12 -10  -2    6.24    0.81
 -12 -10   2    5.90    0.80
  12 -10  -2    5.76    0.66
  12 -10  -2    4.56    0.79
 -12  10   2    4.98    0.80
  12  10  -2    5.83    0.55
  12  10  -2    5.57    0.56
  10 -10  -2    2.55    0.64
  10 -10  -2    4.45    0.69
 -10 -10   2    2.91    0.58
  10 -10  -2    3.34    0.56
 -10 -10   2    2.77    0.53
  10  10  -2    2.97    0.49
 -10  10   2    2.83    0.65
  10  10  -2    3.21    0.47
 -10  10   2    2.49    0.61
  -8 -10   2    5.12    0.72
   8 -10  -2    6.07    0.70
   8 -10  -2    5.67    0.81
   8 -10  -2    4.41    0.69
  -8 -10   2    6.17    0.66
   8 -10  -2    6.27    0.77
   8  10  -2    5.14    0.63
  -8  10   2    6.19    0.79
  -8  10   2    7.28    0.87
   8  10  -2    5.12    0.60
  -8  10   2    6.21    0.80
  -6 -10   2   21.18    1.21
   6 -10  -2   21.23    1.29
  -6 -10   2   24.23    1.40
   6 -10  -2   23.16    1.42
   6 -10  -2   23.28    1.38
   6 -10  -2   27.36    1.38
  -6  10   2   22.73    1.39
  -6  10   2   23.38    1.38
   6  10  -2   24.43    1.16
  -6  10   2   27.30    1.45
   6  10  -2   26.81    1.32
   6  10  -2   22.93    1.25
  -4 -10   2   30.84    1.63
   4 -10  -2   33.82    1.59
   4 -10  -2   32.18    1.64
  -4 -10   2   31.01    1.48
   4 -10  -2   34.16    1.67
  -4  10   2   32.03    1.59
  -4  10   2   31.46    1.63
   4  10  -2   30.80    1.53
  -4  10   2   33.82    1.67
   4  10  -2   30.82    1.42
   4  10  -2   27.37    1.48
  -4  10   2   32.48    1.20
   2 -10  -2    7.15    0.77
   2 -10  -2    9.14    0.87
  -2 -10   2    6.35    0.77
   2 -10  -2    7.21    0.79
  -2 -10   2    7.34    0.43
  -2 -10   2    8.81    0.81
  -2 -10   2    7.68    0.79
  -2  10   2    6.76    0.75
  -2  10   2    6.32    0.46
  -2  10   2    7.69    0.82
  -2  10   2    7.19    0.82
   2  10  -2    7.54    0.77
   2  10  -2    7.64    0.80
   2  10  -2    6.10    0.69
   0 -10  -2    7.36    0.75
   0 -10   2    4.81    0.63
   0 -10   2    4.74    0.66
   0 -10  -2    6.40    0.74
   0 -10  -2    4.48    0.62
   0 -10   2    6.58    0.73
   0  10  -2    6.02    0.73
   0  10   2    5.43    0.69
   0  10  -2    4.49    0.65
   0  10   2    5.90    0.69
   0  10  -2    4.46    0.62
   0  10   2    5.85    0.71
   2 -10   2   62.56    2.64
  -2 -10  -2   60.62    2.42
  -2 -10  -2   65.34    2.56
   2 -10   2   64.97    2.66
   2 -10   2   63.83    2.50
   2  10   2   64.88    2.57
  -2  10  -2   67.19    2.68
  -2  10  -2   62.45    2.55
   2  10   2   59.89    2.54
   2  10   2   63.01    2.41
  -2  10  -2   61.56    2.64
   4 -10   2   16.39    1.13
   4 -10   2   19.75    1.22
  -4 -10  -2   15.91    1.05
  -4 -10  -2   18.38    1.07
   4 -10   2   17.42    1.12
  -4  10  -2   18.61    1.19
   4  10   2   17.99    1.00
   4  10   2   21.98    1.14
   4  10   2   16.73    1.08
  -4  10  -2   18.94    1.22
  -4  10  -2   21.23    1.28
   6 -10   2   11.40    1.06
  -6 -10  -2   10.21    0.87
  -6 -10  -2   11.21    0.90
   6 -10   2   12.14    1.05
   6  10   2   10.96    0.90
  -6  10  -2   11.85    1.09
  -6  10  -2   11.36    1.06
  -6  10  -2   11.59    1.09
   6  10   2   10.46    0.88
  -8 -10  -2    6.12    0.66
   8 -10   2    7.40    0.85
  -8 -10  -2    5.63    0.65
   8  10   2    6.81    0.69
  -8  10  -2    5.48    0.82
  -8  10  -2    6.10    0.85
   8  10   2    6.21    0.67
 -10 -10  -2    2.08    0.49
  10 -10   2    3.25    0.65
 -10  10  -2    4.04    0.77
  10  10   2    2.97    0.50
  10  10   2    3.60    0.51
 -12 -10  -2    1.97    0.49
 -12  10  -2    2.35    0.71
  12  10   2    2.34    0.41
  12  10   2    1.87    0.38
 -14 -10  -2   -0.04    0.40
 -14  10  -2   -1.15    0.49
 -16 -10  -2   -0.54    0.38
 -16  10  -2    0.05    0.69
 -18 -10  -2   -0.27    0.39
 -18  10  -2    0.08    0.71
 -19  11   2    0.08    0.74
 -17 -11   2    0.21    0.38
 -17  11   2    1.60    0.76
 -15 -11   2   -0.44    0.39
 -15 -11   2   -0.32    0.38
  15 -11  -2    0.09    0.55
  15  11  -2    0.04    0.18
 -15  11   2   -0.03    0.59
 -13 -11   2    1.25    0.52
  13 -11  -2    1.11    0.59
 -13 -11   2    1.02    0.44
  13  11  -2    1.05    0.34
 -13  11   2    0.54    0.59
  13  11  -2    0.66    0.34
  11 -11  -2    0.17    0.50
 -11 -11   2    0.52    0.40
  11 -11  -2    0.40    0.51
 -11 -11   2    0.47    0.44
  11 -11  -2    0.24    0.41
  11  11  -2    0.10    0.34
 -11  11   2    0.82    0.53
  11  11  -2    0.48    0.34
  -9 -11   2    0.63    0.43
  -9 -11   2    0.05    0.41
   9 -11  -2    0.42    0.40
   9 -11  -2    0.36    0.49
   9 -11  -2    0.33    0.48
  -9  11   2    0.09    0.44
   9  11  -2    1.02    0.42
  -9  11   2    0.73    0.52
   9  11  -2    1.40    0.42
  -7 -11   2    7.15    0.88
  -7 -11   2    8.78    0.86
   7 -11  -2    8.47    0.94
   7 -11  -2    7.77    0.86
   7 -11  -2    8.89    0.95
   7 -11  -2    7.45    0.93
   7  11  -2    7.97    0.81
  -7  11   2    8.38    0.94
   7  11  -2    8.39    0.82
  -7  11   2    7.18    0.90
  -7  11   2    8.92    0.97
   5 -11  -2   27.58    1.57
   5 -11  -2   27.23    1.53
  -5 -11   2   26.96    1.52
   5 -11  -2   28.77    1.47
  -5 -11   2   23.48    1.33
  -5 -11   2   26.13    1.21
   5 -11  -2   27.16    1.47
  -5  11   2   26.52    1.53
  -5  11   2   25.19    1.48
   5  11  -2   26.52    1.41
   5  11  -2   18.87    1.27
  -5  11   2   28.28    1.56
   5  11  -2   25.90    1.30
  -3 -11   2    0.85    0.43
  -3 -11   2    1.42    0.26
  -3 -11   2    0.27    0.38
   3 -11  -2    0.90    0.43
   3 -11  -2    0.28    0.40
   3 -11  -2    0.75    0.43
   3  11  -2    0.25    0.37
   3  11  -2    1.24    0.46
  -3  11   2    0.35    0.42
  -3  11   2    0.80    0.41
   3  11  -2    0.43    0.36
  -3  11   2    0.17    0.43
   1 -11  -2    1.76    0.47
  -1 -11   2    2.91    0.60
   1 -11  -2    1.93    0.53
   1 -11  -2    2.06    0.52
  -1 -11   2    1.77    0.48
  -1 -11   2    2.07    0.53
  -1  11   2    2.98    0.58
  -1  11   2    2.11    0.52
   1  11  -2    2.29    0.53
  -1  11   2    1.60    0.52
   1  11  -2    1.55    0.48
   1  11  -2    1.41    0.49
   1 -11   2   10.67    0.98
  -1 -11  -2   12.25    1.02
  -1 -11  -2   14.17    1.04
   1 -11   2   13.99    1.04
   1 -11   2   13.16    1.12
  -1  11  -2   11.65    1.07
   1  11   2   13.87    1.03
   1  11   2   13.44    0.94
  -1  11  -2   13.06    1.12
   1  11   2   13.82    1.02
  -1  11  -2   13.15    1.11
  -3 -11  -2   28.08    1.47
   3 -11   2   26.47    1.51
  -3 -11  -2   27.68    1.43
   3 -11   2   26.91    1.55
   3 -11   2   29.77    1.54
  -3  11  -2   27.78    1.58
   3  11   2   26.26    1.47
  -3  11  -2   26.67    1.51
   3  11   2   27.22    1.38
  -3  11  -2   31.29    1.64
  -5 -11  -2    0.03    0.36
   5 -11   2    0.65    0.43
   5 -11   2    0.73    0.47
  -5 -11  -2    0.03    0.33
  -5  11  -2    0.88    0.50
   5  11   2    0.11    0.32
   5  11   2    0.67    0.41
  -5  11  -2   -0.01    0.47
  -5  11  -2    0.78    0.49
  -7 -11  -2    3.06    0.57
   7 -11   2    4.56    0.75
   7  11   2    1.93    0.50
   7  11   2    2.68    0.54
  -7  11  -2    2.78    0.71
  -7  11  -2    2.34    0.63
  -9 -11  -2   -0.08    0.40
   9 -11   2   -0.11    0.47
  -9  11  -2    0.82    0.55
   9  11   2    0.57    0.37
 -11 -11  -2    0.84    0.46
  11  11   2    1.11    0.41
 -11  11  -2    1.51    0.68
 -13 -11  -2    0.03    0.43
 -13  11  -2    0.28    0.59
  13  11   2    0.12    0.30
 -15 -11  -2   -0.15    0.42
 -15  11  -2   -0.38    0.64
 -17 -11  -2   -0.12    0.45
 -17  11  -2   -0.56    0.72
 -18 -12   2    0.78    0.43
 -18  12   2   -0.10    0.68
 -16 -12   2   -0.11    0.43
 -16  12   2    0.41    0.70
 -14 -12   2   -0.23    0.44
  14 -12  -2    0.25    0.55
 -14 -12   2    0.00    0.41
  14  12  -2    0.22    0.31
 -14  12   2   -0.79    0.56
  12 -12  -2    2.51    0.72
 -12 -12   2    1.32    0.56
 -12 -12   2    2.91    0.56
  12 -12  -2    1.98    0.57
  12  12  -2    1.47    0.44
 -12  12   2    0.98    0.66
  10 -12  -2    1.85    0.57
 -10 -12   2    1.43    0.58
  10 -12  -2    1.62    0.64
  10 -12  -2    2.63    0.70
 -10 -12   2    1.15    0.51
 -10  12   2    1.36    0.65
  10  12  -2    0.74    0.40
  -8 -12   2    2.55    0.63
   8 -12  -2    1.88    0.52
   8 -12  -2    2.07    0.66
   8 -12  -2    2.03    0.62
  -8 -12   2    2.33    0.56
   8  12  -2    1.99    0.49
  -8  12   2    1.66    0.65
  -8  12   2    1.97    0.67
   6 -12  -2    3.54    0.75
   6 -12  -2    7.26    0.91
  -6 -12   2    6.68    0.80
   6 -12  -2    6.27    0.87
   6 -12  -2    6.87    0.84
  -6 -12   2    5.88    0.83
  -6  12   2    6.50    0.89
  -6  12   2    6.71    0.92
   6  12  -2    5.67    0.75
   6  12  -2    6.46    0.76
  -6  12   2    5.57    0.85
   4 -12  -2    9.86    1.01
   4 -12  -2    8.39    0.92
   4 -12  -2    9.76    1.05
  -4 -12   2    9.22    0.92
   4 -12  -2    9.28    1.00
  -4 -12   2    9.36    1.01
  -4  12   2    8.88    0.99
  -4  12   2    8.51    0.95
   4  12  -2   10.37    0.92
   4  12  -2    9.75    0.96
   4  12  -2    7.93    0.89
  -4  12   2    8.17    0.97
  -2 -12   2    0.59    0.48
   2 -12  -2    1.17    0.51
   2 -12  -2    1.55    0.54
  -2 -12   2    1.56    0.52
   2 -12  -2    1.98    0.57
   2 -12  -2    1.27    0.46
  -2  12   2    1.64    0.52
  -2  12   2    0.89    0.48
   2  12  -2    1.80    0.50
  -2  12   2    1.51    0.53
   2  12  -2    1.46    0.50
   2  12  -2    1.19    0.53
   0 -12  -2    0.16    0.43
   0 -12  -2    0.42    0.43
   0 -12   2   -0.07    0.42
   0 -12   2    0.30    0.43
   0  12  -2    0.34    0.41
   0  12   2    0.12    0.43
   0  12   2    0.30    0.42
   0  12  -2    0.33    0.47
   0  12  -2    0.22    0.40
   0  12   2    0.17    0.37
  -2 -12  -2    4.16    0.69
   2 -12   2    5.62    0.80
   2 -12   2    6.40    0.84
   2 -12   2    6.03    0.86
  -2 -12  -2    6.53    0.81
   2  12   2    4.81    0.72
   2  12   2    3.22    0.60
  -2  12  -2    6.51    0.84
  -2  12  -2    4.75    0.79
  -2  12  -2    6.19    0.86
   2  12   2    5.00    0.72
   4 -12   2    0.34    0.46
  -4 -12  -2   -0.38    0.39
   4 -12   2    0.80    0.50
   4 -12   2    0.20    0.41
   4  12   2   -0.27    0.32
  -4  12  -2   -0.44    0.38
  -4  12  -2    0.86    0.51
  -4  12  -2    0.32    0.53
  -6 -12  -2    1.27    0.50
   6 -12   2    2.07    0.63
  -6  12  -2    1.48    0.62
   6  12   2    1.76    0.50
  -6  12  -2    1.77    0.61
  -8 -12  -2    3.55    0.63
   8 -12   2    5.23    0.84
  -8  12  -2    2.99    0.78
   8  12   2    2.80    0.57
 -10 -12  -2    1.26    0.50
 -10  12  -2    0.93    0.67
  10  12   2    1.18    0.42
 -12 -12  -2    0.17    0.46
 -12 -12  -2    0.52    0.48
 -12  12  -2    0.77    0.67
  12  12   2    0.13    0.37
 -14 -12  -2    0.78    0.57
 -14 -12  -2   -0.26    0.47
 -14  12  -2    0.07    0.72
 -16 -12  -2    0.42    0.49
 -16  12  -2   -0.56    0.70
 -17 -13   2   -0.41    0.46
 -17  13   2    0.12    0.78
 -15 -13   2    0.41    0.48
 -15 -13   2    0.02    0.52
 -15  13   2    1.24    0.75
 -13 -13   2    0.22    0.48
 -13 -13   2    0.35    0.52
  13 -13  -2    0.82    0.67
 -13  13   2    1.03    0.73
  11 -13  -2    1.43    0.68
 -11 -13   2    1.58    0.59
  11 -13  -2    0.48    0.57
 -11 -13   2    1.21    0.53
  11 -13  -2    1.54    0.56
  11  13  -2    1.31    0.44
 -11  13   2    1.54    0.69
   9 -13  -2   -0.15    0.38
   9 -13  -2   -0.36    0.53
  -9 -13   2    0.10    0.49
  -9 -13   2    1.05    0.56
   9 -13  -2    0.08    0.50
  -9  13   2    0.00    0.57
   9  13  -2   -0.14    0.39
   7 -13  -2    0.22    0.54
  -7 -13   2    0.15    0.47
  -7 -13   2    0.67    0.49
   7 -13  -2    0.06    0.43
   7 -13  -2    0.71    0.56
   7  13  -2    0.17    0.40
  -7  13   2   -0.12    0.51
  -7  13   2    0.75    0.59
  -5 -13   2    0.19    0.48
   5 -13  -2    0.71    0.57
  -5 -13   2    0.57    0.47
   5 -13  -2   -0.11    0.45
   5 -13  -2    0.45    0.47
   5 -13  -2   -0.12    0.41
  -5  13   2    0.32    0.47
   5  13  -2    0.21    0.45
  -5  13   2    1.22    0.57
  -5  13   2    0.67    0.51
   3 -13  -2    1.22    0.54
  -3 -13   2    1.18    0.50
   3 -13  -2    0.30    0.52
  -3 -13   2    1.46    0.57
   3 -13  -2    0.66    0.50
  -3  13   2    0.70    0.52
  -3  13   2    0.24    0.48
   3  13  -2    0.73    0.46
   3  13  -2    0.16    0.47
   1 -13  -2    4.73    0.75
   1 -13  -2    4.94    0.81
  -1 -13   2    6.46    0.90
  -1 -13   2    4.57    0.77
   1 -13  -2    5.57    0.85
  -1  13   2    4.25    0.77
  -1  13   2    4.78    0.77
   1  13  -2    3.65    0.69
   1  13  -2    5.11    0.80
   1 -13   2    0.39    0.46
   1 -13   2    0.77    0.53
  -1 -13  -2    0.72    0.50
  -1 -13  -2    0.93    0.47
  -1  13  -2    0.65    0.51
   1  13   2    0.05    0.41
   1  13   2    0.24    0.44
  -1  13  -2   -0.07    0.45
   3 -13   2    0.38    0.45
   3 -13   2    0.27    0.49
  -3 -13  -2   -0.22    0.41
   3 -13   2    0.53    0.50
  -3  13  -2   -0.09    0.52
   3  13   2    0.61    0.47
  -3  13  -2    0.55    0.52
   5 -13   2   -0.06    0.52
  -5 -13  -2   -0.03    0.46
   5 -13   2   -0.08    0.41
  -5  13  -2    0.34    0.52
   5  13   2   -0.25    0.40
  -5  13  -2    0.77    0.57
   7 -13   2   -0.20    0.55
  -7 -13  -2    0.01    0.46
  -7  13  -2   -1.22    0.48
   7  13   2    0.35    0.42
  -9 -13  -2    0.41    0.50
  -9 -13  -2    0.65    0.53
   9 -13   2    0.08    0.59
   9  13   2    0.26    0.42
  -9  13  -2    0.43    0.62
 -11 -13  -2   -0.50    0.49
 -11 -13  -2    0.14    0.51
 -11  13  -2   -0.14    0.60
 -13 -13  -2    0.33    0.50
 -13  13  -2   -0.10    0.69
 -15 -13  -2    1.07    0.56
 -15  13  -2   -1.12    0.59
 -16 -14   2    0.22    0.51
 -16  14   2    0.50    0.77
 -14 -14   2    1.09    0.58
 -14  14   2    0.74    0.80
  12 -14  -2    0.54    0.63
 -12 -14   2   -0.08    0.49
 -12  14   2    0.18    0.68
 -10 -14   2    0.26    0.51
  10 -14  -2    0.04    0.46
 -10 -14   2   -0.22    0.47
  10 -14  -2   -0.43    0.56
  10 -14  -2    0.06    0.58
  10  14  -2   -0.59    0.37
 -10  14   2    0.44    0.67
   8 -14  -2   -0.09    0.56
   8 -14  -2   -0.02    0.52
  -8 -14   2   -0.29    0.51
   8 -14  -2    0.01    0.47
  -8 -14   2    0.21    0.50
  -8  14   2   -0.34    0.57
   8  14  -2   -0.29    0.41
  -6 -14   2    3.42    0.76
   6 -14  -2    3.58    0.74
  -6 -14   2    3.84    0.72
   6 -14  -2    3.91    0.80
   6 -14  -2    4.94    0.87
   6  14  -2    4.77    0.78
  -6  14   2    5.42    0.91
  -6  14   2    2.49    0.77
   4 -14  -2    3.72    0.78
   4 -14  -2    3.94    0.78
   4 -14  -2    3.51    0.80
  -4 -14   2    3.43    0.73
  -4 -14   2    2.95    0.71
  -4  14   2    4.11    0.80
  -4  14   2    4.22    0.82
   4  14  -2    2.18    0.66
   2 -14  -2   -0.67    0.45
  -2 -14   2    0.00    0.51
  -2 -14   2   -0.42    0.40
   2 -14  -2   -0.47    0.43
  -2  14   2    0.66    0.51
   2  14  -2   -0.26    0.46
  -2  14   2    0.62    0.53
   2  14  -2    0.14    0.48
   0 -14  -2   -0.85    0.34
   0 -14  -2    0.16    0.50
   0 -14   2   -0.16    0.50
   0 -14   2   -0.24    0.45
   0  14  -2    0.05    0.49
   0  14  -2    0.25    0.53
   0  14   2    0.29    0.50
   0  14   2    0.75    0.56
   2 -14   2    6.23    0.90
  -2 -14  -2    5.72    0.86
   2 -14   2    8.43    1.03
  -2 -14  -2    6.26    0.90
   2  14   2    6.07    0.89
  -2  14  -2    4.32    0.82
  -2  14  -2    6.10    0.94
  -4 -14  -2    1.99    0.66
  -4 -14  -2    2.76    0.68
   4 -14   2    3.45    0.77
   4 -14   2    4.14    0.84
  -4  14  -2    2.53    0.74
  -4  14  -2    2.83    0.79
   4  14   2    3.29    0.67
   6 -14   2    1.18    0.68
  -6 -14  -2    0.56    0.52
  -6 -14  -2    1.71    0.63
  -6  14  -2    1.42    0.70
   6  14   2    0.49    0.49
  -8 -14  -2   -0.17    0.51
   8 -14   2    0.69    0.66
   8  14   2    0.27    0.47
  -8  14  -2    0.82    0.64
 -10 -14  -2    0.34    0.57
 -10  14  -2    1.39    0.80
 -12 -14  -2   -0.08    0.54
 -12  14  -2    0.14    0.70
 -14 -14  -2    0.19    0.57
 -14  14  -2    1.42    0.84
 -15 -15   2    0.38    0.57
 -15  15   2   -0.11    0.79
 -13 -15   2   -0.57    0.52
 -13  15   2    1.22    0.82
 -11 -15   2    1.31    0.63
  11 -15  -2   -0.28    0.66
 -11  15   2   -0.29    0.60
  -9 -15   2    0.81    0.62
   9 -15  -2    1.07    0.70
   9 -15  -2    0.51    0.66
   9 -15  -2    0.99    0.58
  -9  15   2    0.57    0.65
   7 -15  -2    0.46    0.57
  -7 -15   2    0.10    0.55
   7 -15  -2    1.04    0.66
   7 -15  -2    1.11    0.67
   7  15  -2    0.88    0.55
  -7  15   2    1.26    0.71
   5 -15  -2    5.35    0.91
   5 -15  -2    6.16    0.97
  -5 -15   2    4.75    0.88
  -5 -15   2    5.06    0.90
  -5  15   2    5.02    0.94
  -5  15   2    6.59    1.03
   5  15  -2    6.26    0.94
   3 -15  -2   -0.10    0.52
  -3 -15   2    0.20    0.57
   3 -15  -2    0.56    0.56
  -3 -15   2    1.22    0.62
  -3  15   2    0.61    0.63
  -3  15   2    1.12    0.66
   3  15  -2    0.37    0.60
   1 -15  -2    1.63    0.66
  -1 -15   2    0.52    0.56
  -1 -15   2    2.01    0.69
   1 -15  -2    2.22    0.68
  -1  15   2    0.92    0.63
   1  15  -2    0.88    0.62
  -1  15   2    1.87    0.67
   1  15  -2    3.15    0.71
  -1 -15  -2    0.29    0.58
  -1 -15  -2    0.44    0.53
   1 -15   2    1.04    0.60
   1 -15   2    0.67    0.55
   1  15   2   -0.21    0.52
  -1  15  -2    1.11    0.64
  -1  15  -2    0.86    0.64
  -3 -15  -2    3.75    0.81
  -3 -15  -2    6.80    1.00
   3 -15   2    5.06    0.90
   3 -15   2    6.41    0.99
   3  15   2    5.76    0.92
  -3  15  -2    5.46    0.96
  -3  15  -2    5.62    0.98
   5 -15   2    0.37    0.64
  -5 -15  -2    0.01    0.52
   5  15   2    0.19    0.55
  -5  15  -2    0.54    0.61
   7 -15   2    0.43    0.67
  -7 -15  -2    0.17    0.55
  -7  15  -2    0.97    0.74
  -9 -15  -2   -0.72    0.54
  -9  15  -2    0.91    0.75
 -11 -15  -2    2.62    0.76
 -11  15  -2    1.63    0.86
 -13 -15  -2   -0.60    0.56
 -13  15  -2   -0.99    0.71
 -14 -16   2    1.68    0.70
 -14  16   2    0.73    0.78
  12 -16  -2   -1.61    0.62
 -12 -16   2    0.47    0.60
 -12  16   2    0.42    0.75
  10 -16  -2    2.08    0.75
 -10 -16   2    2.56    0.73
 -10  16   2    1.89    0.87
   8 -16  -2    0.54    0.64
   8 -16  -2    0.93    0.75
  -8 -16   2    0.60    0.64
  -8  16   2    0.44    0.74
   6 -16  -2    5.04    0.92
   6 -16  -2    4.34    0.93
  -6 -16   2    3.78    0.85
   6  16  -2    4.49    0.87
  -6  16   2    3.10    0.88
  -4 -16   2    2.92    0.78
   4 -16  -2    4.02    0.91
  -4  16   2    4.33    0.92
  -4  16   2    4.93    0.94
   4  16  -2    5.04    0.93
  -2 -16   2    3.80    0.84
   2 -16  -2    4.32    0.87
  -2  16   2    4.18    0.88
   2  16  -2    4.33    0.91
  -2  16   2    3.83    0.90
   0 -16  -2    1.08    0.68
   0 -16   2    1.40    0.71
   0  16  -2    1.75    0.71
   0  16   2    1.10    0.66
   0  16  -2    3.03    0.80
   2 -16   2    1.99    0.79
  -2 -16  -2    3.68    0.81
  -2  16  -2    3.34    0.86
  -2  16  -2    4.65    0.92
   2  16   2    3.02    0.78
   4 -16   2    1.85    0.77
  -4 -16  -2    1.29    0.64
   4  16   2    1.47    0.69
  -4  16  -2    2.09    0.78
   6 -16   2    0.94    0.75
  -6 -16  -2    3.20    0.81
  -6  16  -2    2.41    0.87
   8 -16   2    1.67    0.84
  -8 -16  -2   -0.22    0.57
  -8  16  -2    0.42    0.75
 -10 -16  -2    0.90    0.69
 -10  16  -2    0.14    0.77
 -12 -16  -2    0.18    0.64
 -12  16  -2   -1.36    0.71
 -11 -17   2   -0.79    0.57
 -11  17   2   -0.75    0.75
  -9 -17   2    3.33    0.82
   9 -17  -2    3.04    0.87
  -9  17   2    1.15    0.80
  -7 -17   2   -0.31    0.60
   7 -17  -2   -0.10    0.63
  -7  17   2   -1.11    0.67
   5 -17  -2    2.28    0.85
  -5 -17   2    2.86    0.80
  -5  17   2    3.42    0.92
  -3 -17   2   -0.13    0.61
   3 -17  -2    0.42    0.71
  -3  17   2    0.87    0.74
  -3  17   2    0.48    0.69
   3  17  -2    1.01    0.71
  -1 -17   2   10.09    1.21
   1 -17  -2    8.25    1.13
  -1  17   2   11.02    1.31
   1  17  -2    8.05    1.17
   1 -17   2   -0.20    0.67
  -1 -17  -2   -0.17    0.63
  -1  17  -2   -0.17    0.57
   1  17   2    0.59    0.68
  -3 -17  -2    3.01    0.82
   3 -17   2    2.22    0.86
  -3  17  -2    3.56    0.95
   5 -17   2    0.86    0.70
  -5 -17  -2    1.17    0.72
  -5  17  -2    0.01    0.70
   7 -17   2    4.72    1.01
  -7 -17  -2    4.90    0.94
  -7  17  -2    3.25    1.00
  -9 -17  -2   -0.01    0.64
  -9  17  -2   -0.37    0.75
 -10 -18   2    1.35    0.76
 -10  18   2    0.69    0.85
   8 -18  -2   -0.35    0.73
  -8 -18   2    0.12    0.65
  -8  18   2    0.80    0.88
   6 -18  -2    1.12    0.83
  -6 -18   2    0.62    0.67
  -6  18   2    0.82    0.81
  -4 -18   2    0.91    0.72
   4 -18  -2    0.48    0.73
  -2 -18   2    3.37    0.93
   2 -18  -2    3.01    0.87
  -2  18   2    2.82    0.95
   0 -18   2    2.89    0.90
   0 -18  -2    2.44    0.85
   0  18  -2    2.46    0.84
  -2 -18  -2    1.41    0.78
   2 -18   2    1.28    0.82
   4 -18   2   -0.81    0.57
  -4 -18  -2    0.47    0.68
  -4  18  -2   -1.05    0.67
  -6 -18  -2    2.71    0.87
   6 -18   2    5.17    1.11
  -6  18  -2    2.43    0.99
  -8 -18  -2    0.01    0.74
  -8  18  -2   -1.19    0.76
  -7 -19   2   -0.05    0.72
   7 -19  -2    0.32    0.83
  -7  19   2    0.08    0.85
  -5 -19   2    0.85    0.77
   5 -19  -2    2.17    0.96
  -3 -19   2    1.15    0.84
   3 -19  -2    0.60    0.73
  -1 -19   2    2.93    0.97
   1 -19  -2    3.49    0.91
  -1 -19  -2   -0.62    0.67
   1 -19   2    0.85    0.80
   3 -19   2    1.34    0.85
  -3 -19  -2    1.22    0.79
  -5 -19  -2    1.46    0.79
   5 -19   2    1.38    0.89
 -22   0   3    0.09    0.38
 -20   0   3    0.07    0.35
 -18   0   3   -0.02    0.30
 -16   0   3   -0.20    0.25
 -14   0   3   -0.06    0.17
 -14   0   3   -0.26    0.21
  14   0  -3    0.06    0.16
  14   0  -3    0.09    0.17
 -14   0   3    0.16    0.20
 -12   0   3    0.30    0.19
 -12   0   3    0.09    0.18
 -12   0   3   -0.06    0.15
  12   0  -3    0.21    0.17
  12   0  -3    0.09    0.18
 -12   0   3   -0.13    0.16
  10   0  -3   -0.01    0.16
 -10   0   3    0.01    0.14
 -10   0   3   -0.19    0.15
 -10   0   3    0.14    0.15
  10   0  -3    0.15    0.11
  10   0  -3   -0.07    0.15
 -10   0   3    0.00    0.16
   8   0  -3    0.12    0.14
   8   0  -3   -0.07    0.13
  -8   0   3    0.13    0.15
  -8   0   3    0.05    0.14
   8   0  -3   -0.21    0.11
  -8   0   3   -0.05    0.13
  -8   0   3    0.05    0.15
   6   0  -3   -0.26    0.12
  -6   0   3    0.20    0.15
  -6   0   3   -0.16    0.15
  -6   0   3    0.03    0.13
   6   0  -3    0.24    0.14
  -6   0   3    0.00    0.13
   6   0  -3   -0.01    0.04
  -6   0   3    0.06    0.14
   4   0  -3   -0.19    0.12
  -4   0   3    0.06    0.14
   4   0  -3   -0.22    0.12
   4   0  -3   -0.02    0.14
  -4   0   3   -0.11    0.12
  -4   0   3   -0.08    0.14
  -4   0   3   -0.13    0.12
   4   0  -3   -0.10    0.04
  -4   0   3   -0.15    0.13
   2   0  -3    0.04    0.13
   2   0  -3   -0.09    0.12
   2   0  -3   -0.16    0.12
   2   0  -3   -0.07    0.13
  -2   0   3   -0.08    0.13
  -2   0   3    0.23    0.14
  -2   0   3    0.02    0.13
  -2   0   3   -0.05    0.13
  -2   0   3   -0.11    0.11
   0   0  -3   -0.08    0.13
   0   0   3    0.14    0.14
   0   0  -3   -0.18    0.14
   0   0   3    0.14    0.15
   0   0  -3   -0.06    0.13
   0   0   3   -0.06    0.14
   0   0  -3   -0.12    0.14
   0   0   3   -0.19    0.14
   2   0   3    0.07    0.15
  -2   0  -3    0.32    0.17
   2   0   3   -0.19    0.14
   2   0   3   -0.05    0.13
  -2   0  -3   -0.06    0.14
  -2   0  -3   -0.05    0.15
   2   0   3    0.15    0.12
  -2   0  -3   -0.02    0.14
   2   0   3    0.25    0.21
  -4   0  -3   -0.13    0.17
  -4   0  -3    0.13    0.16
   4   0   3    0.02    0.14
  -4   0  -3    0.00    0.17
   4   0   3    0.03    0.15
  -4   0  -3   -0.18    0.15
   4   0   3    0.24    0.23
   4   0   3   -0.12    0.16
  -6   0  -3   -0.05    0.19
  -6   0  -3    0.09    0.18
   6   0   3    0.01    0.18
  -6   0  -3    0.10    0.17
   6   0   3    0.00    0.18
   6   0   3    0.02    0.16
   8   0   3   -0.17    0.15
   8   0   3   -0.05    0.19
  -8   0  -3    0.25    0.19
   8   0   3    0.18    0.22
  -8   0  -3    0.37    0.23
  -8   0  -3   -0.27    0.18
 -10   0  -3   -0.13    0.21
 -10   0  -3   -0.30    0.24
 -10   0  -3   -0.45    0.19
  10   0   3    0.20    0.22
  10   0   3   -0.46    0.20
  12   0   3   -0.22    0.22
 -12   0  -3    0.09    0.30
 -12   0  -3   -0.50    0.21
  12   0   3    0.13    0.25
 -14   0  -3   -0.08    0.34
 -14   0  -3   -0.14    0.24
  14   0   3    0.27    0.27
  14   0   3   -0.08    0.27
  16   0   3   -0.21    0.25
 -16   0  -3    0.32    0.41
  16   0   3   -0.06    0.25
 -18   0  -3    0.26    0.43
 -20   0  -3   -0.02    0.48
 -23   1   3   -0.06    0.45
 -21  -1   3    0.20    0.30
 -21   1   3    0.49    0.42
 -19  -1   3   -0.64    0.35
 -19  -1   3   -0.07    0.29
 -19   1   3    0.18    0.38
  17  -1  -3   -0.04    0.19
 -17  -1   3    0.20    0.25
 -17   1   3    0.27    0.34
  15  -1  -3    0.24    0.21
 -15  -1   3    0.24    0.22
  15  -1  -3   -0.05    0.23
 -15  -1   3    0.43    0.22
 -15   1   3    0.08    0.27
 -15   1   3    0.11    0.24
 -15   1   3   -0.16    0.21
 -13  -1   3    5.71    0.34
 -13  -1   3    4.92    0.39
  13  -1  -3    5.99    0.43
 -13  -1   3    5.74    0.41
  13  -1  -3    5.90    0.49
 -13   1   3    5.90    0.50
 -13   1   3    5.80    0.48
 -13   1   3    6.16    0.48
  11  -1  -3   52.59    1.94
 -11  -1   3   53.54    1.83
 -11  -1   3   55.03    1.83
 -11  -1   3   53.62    1.78
  11  -1  -3   54.53    1.92
 -11  -1   3   53.64    1.78
  11   1  -3   52.51    1.83
 -11   1   3   55.47    1.88
 -11   1   3   55.11    1.92
 -11   1   3   54.55    1.87
 -11   1   3   53.44    1.94
  -9  -1   3    6.38    0.38
  -9  -1   3    6.43    0.46
  -9  -1   3    6.37    0.37
  -9  -1   3    5.89    0.36
  -9  -1   3    6.39    0.37
   9  -1  -3    6.61    0.38
   9  -1  -3    5.65    0.41
   9  -1  -3    5.93    0.43
  -9   1   3    7.06    0.44
   9   1  -3    5.99    0.37
  -9   1   3    6.59    0.45
   9   1  -3    5.98    0.37
  -9   1   3    5.86    0.42
  -9   1   3    5.88    0.45
  -7  -1   3    0.56    0.15
  -7  -1   3    0.58    0.16
   7  -1  -3    0.43    0.18
  -7  -1   3    0.35    0.15
   7  -1  -3    0.28    0.16
  -7  -1   3    0.49    0.15
  -7  -1   3    0.33    0.18
  -7   1   3    0.44    0.17
   7   1  -3    0.49    0.13
  -7   1   3    0.47    0.18
  -7   1   3    0.25    0.17
  -7   1   3    0.24    0.16
   7   1  -3    0.31    0.15
   7   1  -3    0.61    0.17
   5  -1  -3   -0.04    0.03
   5  -1  -3    0.12    0.15
   5  -1  -3    0.11    0.14
  -5  -1   3    0.21    0.14
  -5  -1   3    0.14    0.13
  -5  -1   3    0.08    0.16
  -5  -1   3    0.12    0.13
  -5  -1   3    0.25    0.14
   5   1  -3    0.10    0.15
  -5   1   3    0.17    0.15
  -5   1   3    0.34    0.16
  -5   1   3    0.13    0.14
  -5   1   3   -0.01    0.13
   5   1  -3    0.39    0.15
   5   1  -3   -0.02    0.09
  -3  -1   3    0.01    0.13
   3  -1  -3    0.16    0.14
  -3  -1   3    0.19    0.15
   3  -1  -3    0.13    0.14
   3  -1  -3    0.16    0.15
  -3  -1   3    0.13    0.14
  -3  -1   3    0.08    0.14
  -3  -1   3    0.07    0.13
   3   1  -3    0.14    0.13
  -3   1   3    0.09    0.13
  -3   1   3    0.21    0.15
  -3   1   3    0.10    0.14
  -3   1   3    0.07    0.15
   3   1  -3    0.30    0.15
  -3   1   3    0.14    0.14
   3   1  -3    0.06    0.14
  -1  -1   3   55.06    1.90
  -1  -1   3   54.63    1.82
   1  -1  -3   53.14    1.81
   1  -1  -3   53.14    1.89
   1  -1  -3   53.06    1.79
  -1  -1   3   52.84    1.80
   1  -1  -3   54.99    1.90
  -1  -1   3   55.17    1.82
   1  -1  -3   55.70    1.79
  -1   1   3   54.99    1.91
  -1   1   3   52.87    1.88
  -1   1   3   55.96    1.80
   1   1  -3   55.91    1.90
   1   1  -3   55.07    1.81
  -1   1   3   51.85    1.80
   1   1  -3   53.42    1.82
  -1  -1  -3    2.91    0.29
  -1  -1  -3    3.28    0.29
  -1  -1  -3    2.60    0.28
   1  -1   3    2.86    0.31
   1  -1   3    3.24    0.33
  -1  -1  -3    3.50    0.30
  -1  -1  -3    3.83    0.33
   1  -1   3    2.80    0.29
  -1   1  -3    2.22    0.27
   1   1   3    2.77    0.30
  -1   1  -3    2.89    0.30
  -1   1  -3    2.78    0.28
   1   1   3    2.70    0.35
   1   1   3    3.14    0.30
   1   1   3    3.15    0.29
  -1   1  -3    3.21    0.32
   1   1   3    3.39    0.30
  -3  -1  -3    6.71    0.54
  -3  -1  -3    7.50    0.42
   3  -1   3    7.74    0.57
  -3  -1  -3    6.15    0.42
  -3  -1  -3    6.68    0.45
   3  -1   3    7.43    0.44
  -3  -1  -3    6.72    0.42
   3   1   3    7.80    0.46
   3   1   3    7.91    0.47
  -3   1  -3    8.52    0.48
   3   1   3    7.11    0.42
  -3   1  -3    7.10    0.48
  -3   1  -3    7.63    0.50
   3   1   3    7.40    0.42
   3   1   3    7.67    0.57
  -5  -1  -3   19.74    0.79
  -5  -1  -3   19.24    1.02
  -5  -1  -3   18.37    0.79
   5  -1   3   20.06    0.79
  -5  -1  -3   18.93    0.81
   5  -1   3   18.06    0.86
  -5  -1  -3   17.62    0.81
   5  -1   3   17.24    0.98
  -5   1  -3   18.51    0.82
   5   1   3   18.98    0.84
  -5   1  -3   17.90    0.85
   5   1   3   18.79    1.03
   5   1   3   19.12    0.84
  -5   1  -3   18.98    1.00
  -5   1  -3   19.05    0.87
  -7  -1  -3    7.07    0.47
   7  -1   3    7.22    0.53
  -7  -1  -3    6.19    0.48
  -7  -1  -3    6.03    0.44
   7  -1   3    4.37    0.38
   7   1   3    6.59    0.47
   7   1   3    6.70    0.37
   7   1   3    6.50    0.46
  -7   1  -3    6.58    0.54
  -7   1  -3    7.73    0.51
  -7   1  -3    6.02    0.51
  -9  -1  -3    0.57    0.23
  -9  -1  -3    0.66    0.23
   9  -1   3    1.07    0.30
   9  -1   3    0.98    0.23
  -9  -1  -3    0.84    0.28
  -9   1  -3    1.12    0.29
   9   1   3    1.04    0.27
  -9   1  -3    0.98    0.28
   9   1   3    0.58    0.24
  -9   1  -3    0.88    0.29
 -11  -1  -3   -0.11    0.20
  11  -1   3    0.08    0.26
 -11  -1  -3   -0.10    0.26
 -11  -1  -3    0.23    0.23
  11   1   3   -0.15    0.22
 -11   1  -3    0.36    0.29
 -11   1  -3   -0.19    0.24
 -11   1  -3   -0.21    0.23
  11   1   3    0.51    0.25
  13  -1   3    4.21    0.52
 -13  -1  -3    3.69    0.48
  13  -1   3    3.53    0.46
 -13  -1  -3    3.95    0.42
  13   1   3    4.14    0.44
 -13   1  -3    4.24    0.50
 -13   1  -3    3.80    0.54
  13   1   3    3.33    0.40
 -15  -1  -3    0.59    0.38
  15  -1   3    0.26    0.31
  15  -1   3   -0.07    0.31
  15   1   3    0.17    0.24
  15   1   3    0.34    0.24
 -15   1  -3    0.87    0.42
 -17  -1  -3    1.03    0.45
  17  -1   3    0.68    0.32
 -17   1  -3    0.61    0.45
 -19  -1  -3   -0.15    0.43
 -19   1  -3    0.60    0.51
 -24   2   3    0.43    0.52
 -22   2   3    0.49    0.49
  20  -2  -3    0.00    0.19
 -20   2   3    0.08    0.42
 -18  -2   3    0.16    0.24
 -18  -2   3   -0.57    0.30
  18  -2  -3   -0.04    0.24
 -18   2   3   -0.92    0.32
 -16  -2   3    0.94    0.23
 -16  -2   3    0.83    0.35
 -16  -2   3    1.09    0.24
  16  -2  -3    1.19    0.29
 -16   2   3    0.56    0.34
 -16   2   3    0.86    0.31
  14  -2  -3    6.66    0.58
 -14  -2   3    8.01    0.44
  14  -2  -3    7.96    0.55
 -14  -2   3    7.44    0.42
 -14  -2   3    8.52    0.58
 -14   2   3    8.65    0.60
 -14   2   3    7.42    0.61
 -14   2   3    8.46    0.65
 -12  -2   3    6.52    0.54
  12  -2  -3    6.52    0.53
  12  -2  -3    5.90    0.53
 -12  -2   3    5.87    0.38
 -12  -2   3    6.44    0.38
 -12  -2   3    6.97    0.32
  12  -2  -3    6.50    0.37
 -12   2   3    6.94    0.55
 -12   2   3    7.15    0.56
 -12   2   3    7.42    0.56
  10  -2  -3   13.94    0.72
 -10  -2   3   14.29    0.59
 -10  -2   3   12.90    0.57
 -10  -2   3   13.68    0.58
 -10  -2   3   14.09    0.58
  10  -2  -3   14.37    0.64
  10  -2  -3   13.35    0.73
 -10  -2   3   13.64    0.68
  10   2  -3   13.28    0.57
 -10   2   3   13.39    0.72
 -10   2   3   14.92    0.73
 -10   2   3   13.79    0.71
 -10   2   3   15.38    0.74
   8  -2  -3   14.05    0.66
  -8  -2   3   14.09    0.68
  -8  -2   3   15.52    0.64
  -8  -2   3   14.94    0.61
   8  -2  -3   14.43    0.75
   8  -2  -3   14.12    0.72
  -8  -2   3   15.63    0.62
  -8  -2   3   15.44    0.64
  -8   2   3   14.66    0.72
  -8   2   3   15.71    0.73
  -8   2   3   14.71    0.73
  -8   2   3   15.51    0.74
   8   2  -3   14.16    0.62
   8   2  -3   15.57    0.70
   6  -2  -3    7.20    0.47
  -6  -2   3    6.64    0.40
  -6  -2   3    6.86    0.40
   6  -2  -3    7.00    0.45
  -6  -2   3    6.86    0.40
  -6  -2   3    8.39    0.43
  -6  -2   3    8.05    0.46
   6   2  -3    8.01    0.42
  -6   2   3    7.04    0.46
   6   2  -3    8.65    0.45
   6   2  -3    7.55    0.37
  -6   2   3    7.98    0.49
  -6   2   3    7.25    0.47
   6   2  -3    7.27    0.44
  -6   2   3    6.40    0.45
  -4  -2   3    0.59    0.18
   4  -2  -3    0.18    0.16
  -4  -2   3    0.48    0.16
   4  -2  -3    0.29    0.16
   4  -2  -3    0.36    0.18
  -4  -2   3    0.36    0.16
  -4  -2   3    0.63    0.17
   4   2  -3    0.33    0.16
  -4   2   3    0.61    0.19
   4   2  -3    0.49    0.16
  -4   2   3    0.65    0.18
  -4   2   3    0.26    0.16
  -4   2   3    0.45    0.19
   4   2  -3    0.13    0.15
   2  -2  -3  115.47    3.80
  -2  -2   3  117.92    3.79
   2  -2  -3  106.57    3.62
   2  -2  -3  115.22    3.80
  -2  -2   3  116.19    3.62
  -2  -2   3  118.36    3.63
  -2  -2   3  113.43    3.62
  -2   2   3  113.62    3.63
   2   2  -3  117.03    3.61
   2   2  -3  115.06    3.63
   2   2  -3  118.56    3.79
  -2   2   3  115.27    3.60
  -2   2   3  115.37    3.81
  -2   2   3  114.84    3.79
   0  -2  -3   16.79    0.68
   0  -2   3   16.16    0.73
   0  -2  -3   16.09    0.71
   0  -2  -3   17.17    0.75
   0  -2  -3   17.50    0.71
   0  -2   3   16.52    0.74
   0  -2  -3   16.11    0.74
   0   2   3   15.48    0.68
   0   2   3   17.60    0.76
   0   2   3   17.55    0.72
   0   2  -3   17.86    0.78
   0   2  -3   17.00    0.76
  -2  -2  -3   27.82    0.98
   2  -2   3   27.55    1.17
   2  -2   3   27.54    1.05
  -2  -2  -3   27.51    1.07
  -2  -2  -3   27.02    1.02
   2  -2   3   29.09    1.14
  -2  -2  -3   27.03    1.08
  -2  -2  -3   25.12    1.03
  -2   2  -3   27.65    1.09
   2   2   3   27.08    1.09
  -2   2  -3   28.34    1.07
  -2   2  -3   26.19    1.11
   2   2   3   27.00    0.99
   2   2   3   25.88    1.22
   2   2   3   27.97    1.02
   4  -2   3   20.42    1.01
  -4  -2  -3   21.27    0.84
  -4  -2  -3   20.70    0.88
  -4  -2  -3   20.50    0.79
  -4  -2  -3   19.31    1.03
   4  -2   3   19.96    0.86
  -4  -2  -3   19.43    0.86
  -4  -2  -3   18.69    0.84
  -4   2  -3   20.16    1.01
  -4   2  -3   19.25    0.88
  -4   2  -3   21.96    0.96
   4   2   3   20.76    0.81
  -4   2  -3   20.80    0.92
   4   2   3   21.62    0.89
   4   2   3   19.84    0.88
  -6  -2  -3   32.62    1.23
  -6  -2  -3   34.26    1.21
  -6  -2  -3   31.57    1.25
  -6  -2  -3   34.60    1.18
   6  -2   3   32.28    1.24
   6  -2   3   32.16    1.35
  -6   2  -3   33.00    1.28
   6   2   3   30.51    1.26
  -6   2  -3   31.59    1.34
  -6   2  -3   31.94    1.31
   6   2   3   33.50    1.27
  -6   2  -3   31.86    1.49
   6   2   3   32.90    1.14
   8  -2   3   48.79    1.88
  -8  -2  -3   49.94    1.69
  -8  -2  -3   46.47    1.70
  -8  -2  -3   49.09    1.75
  -8   2  -3   47.02    1.81
  -8   2  -3   48.24    1.85
  -8   2  -3   50.12    1.79
   8   2   3   46.65    1.75
   8   2   3   46.08    1.75
  10  -2   3    0.25    0.28
  10  -2   3    0.18    0.20
 -10  -2  -3    0.02    0.19
 -10  -2  -3    0.05    0.25
 -10  -2  -3    0.11    0.21
  10   2   3    0.26    0.22
 -10   2  -3    0.00    0.23
 -10   2  -3    0.46    0.27
 -10   2  -3   -0.06    0.29
  10   2   3   -0.03    0.20
 -12  -2  -3    2.31    0.39
  12  -2   3    1.84    0.43
 -12  -2  -3    2.69    0.35
 -12   2  -3    2.62    0.42
  12   2   3    2.14    0.32
 -12   2  -3    2.61    0.49
  12   2   3    2.85    0.35
 -14  -2  -3    3.29    0.47
  14  -2   3    2.64    0.49
 -14   2  -3    2.53    0.52
  14   2   3    2.75    0.31
  14   2   3    3.04    0.34
  16  -2   3    0.58    0.35
 -16  -2  -3    0.63    0.38
 -16   2  -3    1.29    0.51
 -18  -2  -3    0.46    0.39
 -18   2  -3   -0.37    0.45
 -20  -2  -3    0.10    0.44
 -20   2  -3    0.71    0.57
 -23   3   3   -0.04    0.54
 -21   3   3    1.23    0.52
  19  -3  -3    0.28    0.30
 -19   3   3    0.41    0.47
 -17  -3   3    0.00    0.28
  17  -3  -3    0.53    0.30
 -17   3   3   -0.31    0.37
 -15  -3   3    3.61    0.29
 -15  -3   3    3.43    0.43
 -15  -3   3    3.80    0.30
  15  -3  -3    4.07    0.48
  15  -3  -3    2.91    0.46
 -15   3   3    4.38    0.54
 -15   3   3    4.22    0.51
  13  -3  -3   11.27    0.56
  13  -3  -3   10.45    0.68
 -13  -3   3   10.68    0.50
  13  -3  -3   11.97    0.75
 -13  -3   3   11.09    0.62
 -13  -3   3   10.10    0.49
 -13   3   3   11.94    0.74
 -13   3   3   10.14    0.71
 -13   3   3   12.31    0.76
 -11  -3   3    0.47    0.13
  11  -3  -3    0.36    0.27
 -11  -3   3    0.71    0.24
  11  -3  -3    0.67    0.22
  11  -3  -3    0.47    0.23
 -11  -3   3    0.53    0.17
 -11  -3   3    0.41    0.13
 -11  -3   3    0.77    0.17
 -11   3   3    0.93    0.26
 -11   3   3    0.38    0.27
  11   3  -3    0.29    0.12
 -11   3   3    0.34    0.25
 -11   3   3    0.58    0.26
  -9  -3   3   23.37    0.88
  -9  -3   3   23.21    0.93
   9  -3  -3   23.32    0.98
   9  -3  -3   23.30    1.07
   9  -3  -3   22.92    1.04
  -9  -3   3   23.80    0.88
  -9  -3   3   23.17    0.86
  -9  -3   3   24.63    0.87
  -9   3   3   22.71    1.04
  -9   3   3   22.82    1.01
  -9   3   3   21.49    1.01
  -9   3   3   21.65    1.04
   9   3  -3   22.14    0.87
   9   3  -3   21.75    0.99
  -7  -3   3   12.30    0.56
  -7  -3   3   12.23    0.58
  -7  -3   3   12.40    0.56
  -7  -3   3   12.54    0.60
   7  -3  -3   10.82    0.68
   7  -3  -3   12.36    0.66
   7   3  -3   12.00    0.59
  -7   3   3   11.88    0.67
   7   3  -3   12.90    0.50
  -7   3   3   12.49    0.68
   7   3  -3   12.93    0.58
  -7   3   3   12.27    0.67
  -7   3   3   12.61    0.66
   7   3  -3   11.99    0.65
  -5  -3   3  130.26    4.27
   5  -3  -3  129.12    4.36
  -5  -3   3  137.55    4.11
  -5  -3   3  131.46    4.09
  -5  -3   3  131.60    4.10
   5  -3  -3  136.91    4.38
   5  -3  -3  126.88    4.17
  -5   3   3  132.71    4.18
  -5   3   3  125.11    4.36
   5   3  -3  133.92    4.28
   5   3  -3  128.63    4.38
  -5   3   3  132.96    4.18
   5   3  -3  134.41    4.09
  -5   3   3  128.70    4.35
  -3  -3   3   31.48    1.14
  -3  -3   3   30.71    1.19
   3  -3  -3   31.10    1.18
   3  -3  -3   29.92    1.22
  -3  -3   3   31.67    1.14
   3  -3  -3   30.87    1.23
  -3  -3   3   30.55    1.13
  -3   3   3   30.50    1.17
   3   3  -3   30.11    1.19
  -3   3   3   30.13    1.23
   3   3  -3   30.89    1.23
  -3   3   3   31.48    1.23
   3   3  -3   27.70    1.12
   1  -3  -3  145.22    4.50
   1  -3  -3  144.10    4.70
  -1  -3   3  146.52    4.70
  -1  -3   3  137.87    4.48
   1  -3  -3  147.13    4.69
  -1   3   3  151.90    4.72
  -1   3   3  138.02    4.68
  -1   3   3  143.85    4.50
   1   3  -3  138.46    4.50
  -1   3   3  142.85    4.43
   1   3  -3  141.47    4.70
  -1  -3  -3   69.00    2.35
   1  -3   3   65.09    2.39
  -1  -3  -3   69.69    2.37
  -1  -3  -3   69.66    2.25
   1  -3   3   66.35    2.27
  -1  -3  -3   64.34    2.25
   1   3   3   69.03    2.19
  -1   3  -3   66.42    2.40
  -1   3  -3   68.20    2.31
   1   3   3   66.45    2.24
   1   3   3   68.85    2.36
   1   3   3   69.41    2.53
   1   3   3   68.79    2.38
  -3  -3  -3   43.03    1.37
   3  -3   3   41.40    1.59
  -3  -3  -3   39.90    1.44
  -3  -3  -3   41.38    1.70
   3  -3   3   38.29    1.47
  -3  -3  -3   40.52    1.51
   3  -3   3   40.21    1.61
  -3  -3  -3   41.43    1.44
  -3  -3  -3   39.99    1.50
   3   3   3   40.15    1.52
  -3   3  -3   39.44    1.58
  -3   3  -3   38.31    1.53
   3   3   3   39.53    1.37
   3   3   3   42.51    1.73
   3   3   3   40.38    1.51
   5  -3   3   27.61    1.11
  -5  -3  -3   26.57    1.10
  -5  -3  -3   27.57    1.05
  -5  -3  -3   27.64    1.07
  -5  -3  -3   27.11    1.10
   5  -3   3   24.99    1.24
  -5  -3  -3   28.02    0.97
  -5   3  -3   27.86    1.19
  -5   3  -3   27.64    1.21
  -5   3  -3   29.40    1.30
   5   3   3   27.08    1.38
   5   3   3   27.32    1.01
   5   3   3   27.37    1.11
   5   3   3   25.33    1.10
  -7  -3  -3   19.34    0.86
   7  -3   3   18.99    0.88
   7  -3   3   19.71    0.99
  -7  -3  -3   18.87    0.85
  -7  -3  -3   20.07    0.83
  -7  -3  -3   18.62    0.75
  -7   3  -3   18.24    0.97
  -7   3  -3   19.58    1.00
  -7   3  -3   18.99    0.95
   7   3   3   19.12    0.71
   7   3   3   19.80    0.86
   7   3   3   19.09    0.87
  -9  -3  -3    3.18    0.35
  -9  -3  -3    3.08    0.38
  -9  -3  -3    3.38    0.32
  -9  -3  -3    3.49    0.36
   9  -3   3    2.77    0.45
  -9   3  -3    4.05    0.49
  -9   3  -3    3.12    0.43
   9   3   3    3.26    0.36
  -9   3  -3    3.08    0.48
   9   3   3    3.58    0.37
 -11  -3  -3    0.65    0.23
 -11  -3  -3    1.23    0.29
  11  -3   3    1.30    0.39
 -11  -3  -3    1.10    0.30
  11   3   3    1.14    0.26
  11   3   3    1.11    0.27
 -11   3  -3    1.19    0.36
 -11   3  -3    0.68    0.39
 -13  -3  -3    4.89    0.51
  13  -3   3    5.87    0.67
 -13   3  -3    5.81    0.71
  13   3   3    5.16    0.39
  13   3   3    5.13    0.40
 -15  -3  -3    2.04    0.42
 -15   3  -3    2.25    0.58
 -17  -3  -3   -0.21    0.35
 -17   3  -3   -0.76    0.42
 -19  -3  -3    0.96    0.43
 -19   3  -3    0.39    0.55
 -22   4   3    0.16    0.54
 -20   4   3    0.04    0.50
 -18   4   3    1.87    0.54
  16  -4  -3   -0.27    0.29
  16  -4  -3   -0.16    0.27
 -16  -4   3   -0.08    0.25
 -16   4   3    0.37    0.41
 -14  -4   3    1.22    0.21
 -14  -4   3    1.58    0.31
 -14  -4   3    1.26    0.21
  14  -4  -3    1.79    0.37
  14  -4  -3    1.24    0.37
 -14   4   3    1.09    0.37
 -14   4   3    1.52    0.42
 -12  -4   3   -0.20    0.15
  12  -4  -3    0.37    0.27
  12  -4  -3    0.04    0.14
 -12  -4   3    0.37    0.17
 -12  -4   3   -0.04    0.21
  12  -4  -3    0.35    0.30
  12  -4  -3    0.03    0.10
 -12   4   3    0.28    0.27
 -12   4   3    0.22    0.27
 -12   4   3   -0.37    0.28
  10  -4  -3   17.21    0.91
 -10  -4   3   16.87    0.68
 -10  -4   3   16.44    0.69
 -10  -4   3   16.50    0.74
  10  -4  -3   15.36    0.82
 -10  -4   3   16.66    0.69
 -10  -4   3   16.41    0.69
  10  -4  -3   18.20    0.95
 -10   4   3   16.47    0.91
 -10   4   3   18.19    0.93
  10   4  -3   16.18    0.67
  10   4  -3   15.48    0.67
 -10   4   3   18.29    0.90
 -10   4   3   16.10    0.89
  -8  -4   3    1.14    0.22
  -8  -4   3    1.30    0.21
   8  -4  -3    1.44    0.31
  -8  -4   3    1.41    0.23
  -8  -4   3    1.03    0.25
   8  -4  -3    1.32    0.32
   8   4  -3    1.24    0.29
  -8   4   3    1.05    0.27
   8   4  -3    1.19    0.22
  -8   4   3    1.67    0.33
  -8   4   3    1.24    0.30
  -6  -4   3   37.43    1.32
   6  -4  -3   36.82    1.49
   6  -4  -3   37.91    1.43
  -6  -4   3   36.76    1.31
   6  -4  -3   37.64    1.50
  -6  -4   3   35.38    1.31
  -6  -4   3   35.50    1.36
   6   4  -3   34.86    1.46
  -6   4   3   36.62    1.42
  -6   4   3   37.80    1.50
   6   4  -3   34.72    1.25
  -6   4   3   35.17    1.48
   6   4  -3   36.58    1.36
  -4  -4   3   -0.10    0.17
  -4  -4   3    0.22    0.18
   4  -4  -3    0.11    0.18
  -4  -4   3    0.01    0.15
  -4  -4   3    0.13    0.16
   4  -4  -3    0.11    0.18
   4  -4  -3    0.06    0.19
  -4   4   3    0.25    0.20
   4   4  -3    0.20    0.16
  -4   4   3    0.30    0.20
   4   4  -3    0.09    0.18
  -4   4   3   -0.06    0.19
   4   4  -3   -0.04    0.17
  -2  -4   3   98.40    3.43
  -2  -4   3   99.31    3.29
   2  -4  -3  104.39    3.47
   2  -4  -3  103.06    3.46
   2  -4  -3   99.27    3.31
  -2   4   3  104.98    3.47
   2   4  -3   99.76    3.51
   2   4  -3  102.11    3.30
  -2   4   3  100.79    3.47
   2   4  -3  102.30    3.45
  -2   4   3  103.11    3.32
   0  -4  -3    0.58    0.21
   0  -4  -3    0.76    0.23
   0  -4   3    1.05    0.25
   0  -4   3    0.57    0.22
   0  -4  -3    0.20    0.18
   0   4   3   -0.06    0.16
   0   4  -3    0.98    0.26
   0   4   3    0.02    0.18
   0   4   3    0.54    0.21
   0   4  -3    0.67    0.24
   0   4   3    0.44    0.22
   0   4  -3    0.66    0.23
  -2  -4  -3   53.21    1.90
   2  -4   3   52.36    1.97
   2  -4   3   52.91    1.93
  -2  -4  -3   51.95    1.80
   2  -4   3   53.62    1.86
  -2  -4  -3   50.69    1.81
  -2  -4  -3   48.06    1.87
  -2   4  -3   51.23    1.97
   2   4   3   53.17    1.80
   2   4   3   50.57    2.05
   2   4   3   52.76    1.72
   2   4   3   51.16    1.91
  -2   4  -3   50.31    1.89
   4  -4   3    5.35    0.54
  -4  -4  -3    5.49    0.44
   4  -4   3    5.30    0.48
  -4  -4  -3    4.39    0.41
  -4  -4  -3    4.93    0.42
  -4  -4  -3    5.10    0.44
   4  -4   3    4.58    0.49
  -4   4  -3    5.06    0.52
   4   4   3    5.05    0.33
  -4   4  -3    4.50    0.49
   4   4   3    5.00    0.45
   4   4   3    3.47    0.54
   4   4   3    5.13    0.45
  -6  -4  -3    4.76    0.43
   6  -4   3    5.31    0.51
  -6  -4  -3    5.12    0.32
  -6  -4  -3    6.43    0.47
  -6  -4  -3    4.47    0.42
  -6  -4  -3    5.60    0.46
   6   4   3    5.23    0.46
   6   4   3    4.92    0.36
  -6   4  -3    4.86    0.53
   6   4   3    6.02    0.47
  -6   4  -3    5.01    0.56
  -6   4  -3    5.11    0.56
  -6   4  -3    5.85    0.59
  -8  -4  -3    2.86    0.34
  -8  -4  -3    3.19    0.26
   8  -4   3    3.58    0.42
   8  -4   3    3.12    0.48
  -8  -4  -3    3.18    0.37
  -8  -4  -3    3.38    0.38
   8   4   3    3.62    0.38
  -8   4  -3    1.96    0.43
  -8   4  -3    3.57    0.47
   8   4   3    2.99    0.35
  10  -4   3   11.11    0.82
 -10  -4  -3   10.11    0.47
 -10  -4  -3   10.27    0.64
 -10  -4  -3   10.08    0.60
 -10  -4  -3   10.55    0.60
  10  -4   3   10.05    0.63
 -10   4  -3   10.69    0.69
  10   4   3   10.71    0.59
  10   4   3   10.71    0.60
 -10   4  -3   10.25    0.86
 -10   4  -3   11.60    0.79
 -12  -4  -3    0.24    0.20
 -12  -4  -3    0.39    0.30
  12  -4   3   -0.17    0.33
 -12   4  -3    0.15    0.26
  12   4   3    0.55    0.23
 -12   4  -3    0.04    0.33
 -12   4  -3    0.27    0.40
  12   4   3    0.53    0.22
 -14  -4  -3    0.96    0.34
 -14   4  -3    0.20    0.47
 -16  -4  -3    0.43    0.37
 -16   4  -3    0.76    0.51
 -18  -4  -3   -0.52    0.34
 -18   4  -3    1.17    0.61
 -20   4  -3    0.38    0.63
 -23   5   3    0.17    0.62
 -21   5   3    0.31    0.53
 -19   5   3    0.08    0.51
  17  -5  -3    3.11    0.56
 -17   5   3    3.24    0.62
  15  -5  -3   -0.27    0.32
 -15  -5   3   -0.22    0.21
 -15  -5   3    0.18    0.18
 -15  -5   3   -0.21    0.18
  15  -5  -3   -0.08    0.32
 -15   5   3    0.45    0.39
 -15   5   3    0.30    0.35
 -13  -5   3    7.95    0.49
  13  -5  -3    7.70    0.76
 -13  -5   3    8.76    0.48
  13  -5  -3    8.96    0.78
 -13  -5   3    8.24    0.47
 -13   5   3    7.73    0.74
 -13   5   3    7.65    0.76
 -11  -5   3    9.49    0.53
  11  -5  -3    8.53    0.68
 -11  -5   3    9.07    0.51
  11  -5  -3    9.85    0.81
 -11  -5   3    9.55    0.47
 -11  -5   3    8.83    0.63
  11  -5  -3    9.76    0.72
 -11  -5   3    9.10    0.51
  11  -5  -3    8.98    0.51
  11   5  -3    9.16    0.47
  11   5  -3    9.18    0.44
 -11   5   3    8.01    0.73
 -11   5   3    7.23    0.71
   9  -5  -3   27.81    1.36
  -9  -5   3   29.32    1.30
  -9  -5   3   28.92    1.10
  -9  -5   3   28.97    1.10
  -9  -5   3   27.93    1.10
   9  -5  -3   30.66    1.29
  -9  -5   3   30.13    1.15
   9   5  -3   29.12    1.14
  -9   5   3   30.34    1.38
  -9   5   3   31.37    1.34
   9   5  -3   27.85    1.12
  -9   5   3   31.09    1.37
  -7  -5   3    1.69    0.27
   7  -5  -3    2.58    0.40
  -7  -5   3    1.95    0.29
   7  -5  -3    1.23    0.33
  -7  -5   3    2.15    0.29
  -7  -5   3    2.62    0.39
  -7  -5   3    1.70    0.29
   7  -5  -3    2.42    0.37
   7   5  -3    2.57    0.26
  -7   5   3    1.39    0.34
  -7   5   3    1.93    0.37
  -7   5   3    2.41    0.40
   7   5  -3    2.58    0.32
   7   5  -3    2.68    0.32
   7   5  -3    2.52    0.40
  -5  -5   3   39.56    1.65
   5  -5  -3   40.34    1.67
  -5  -5   3   40.57    1.48
  -5  -5   3   42.76    1.51
   5  -5  -3   41.93    1.67
  -5  -5   3   41.99    1.51
  -5  -5   3   40.12    1.55
   5  -5  -3   40.94    1.59
   5   5  -3   42.04    1.57
   5   5  -3   39.01    1.65
  -5   5   3   40.25    1.60
   5   5  -3   41.47    1.47
  -5   5   3   39.28    1.66
  -5   5   3   40.68    1.67
  -3  -5   3   82.79    2.79
  -3  -5   3   84.80    2.92
   3  -5  -3   84.84    2.86
   3  -5  -3   80.21    2.97
   3  -5  -3   84.91    2.97
  -3   5   3   82.29    2.84
  -3   5   3   85.08    2.99
  -3   5   3   84.83    2.99
   3   5  -3   88.51    3.03
   3   5  -3   79.81    2.92
   3   5  -3   84.15    2.80
   1  -5  -3  108.27    3.77
   1  -5  -3  109.93    3.62
  -1  -5   3  111.73    3.78
  -1  -5   3  109.67    3.60
   1  -5  -3  107.39    3.77
   1   5  -3  109.88    3.84
   1   5  -3  110.87    3.80
  -1   5   3  114.98    3.63
  -1   5   3  113.97    3.79
  -1   5   3  111.16    3.80
   1   5  -3  108.42    3.63
  -1  -5  -3    6.85    0.57
   1  -5   3    5.89    0.54
   1  -5   3    7.68    0.63
  -1  -5  -3    6.73    0.54
  -1  -5  -3    7.13    0.52
  -1   5  -3    6.06    0.56
  -1   5  -3    7.76    0.56
  -1   5  -3    7.86    0.65
   1   5   3    6.96    0.53
   1   5   3    6.90    0.52
   1   5   3    6.69    0.54
   1   5   3    7.53    0.52
   3  -5   3   37.15    1.53
  -3  -5  -3   39.12    1.53
  -3  -5  -3   40.64    1.72
  -3  -5  -3   39.60    1.47
  -3  -5  -3   38.99    1.47
   3  -5   3   40.51    1.54
   3  -5   3   38.17    1.63
  -3  -5  -3   37.26    1.52
   3   5   3   39.91    1.45
  -3   5  -3   40.92    1.61
   3   5   3   39.41    1.34
   3   5   3   38.76    1.54
  -3   5  -3   41.45    1.66
  -3   5  -3   38.57    1.64
   3   5   3   40.29    1.56
   3   5   3   36.03    1.70
  -3   5  -3   40.44    1.62
  -5  -5  -3    2.41    0.34
   5  -5   3    3.29    0.43
  -5  -5  -3    2.83    0.36
  -5  -5  -3    2.63    0.36
  -5  -5  -3    3.27    0.36
   5  -5   3    4.33    0.53
   5   5   3    3.08    0.37
   5   5   3    2.41    0.30
  -5   5  -3    2.57    0.39
  -5   5  -3    3.00    0.44
   5   5   3    3.02    0.26
   5   5   3    3.25    0.38
  -5   5  -3    3.25    0.48
  -5   5  -3    2.51    0.42
  -7  -5  -3    0.49    0.24
   7  -5   3    0.85    0.30
   7  -5   3    0.78    0.30
  -7  -5  -3    0.68    0.27
  -7  -5  -3    0.63    0.23
  -7   5  -3    0.83    0.30
   7   5   3    0.61    0.25
   7   5   3    0.54    0.25
   7   5   3    0.77    0.19
  -7   5  -3    1.03    0.33
  -7   5  -3    0.92    0.37
  -7   5  -3    1.16    0.33
  -7   5  -3    0.46    0.30
   9  -5   3   16.10    1.02
  -9  -5  -3   15.96    0.80
  -9  -5  -3   16.18    0.78
  -9  -5  -3   15.93    0.79
   9  -5   3   14.89    0.86
  -9   5  -3   16.56    0.90
   9   5   3   15.82    0.78
  -9   5  -3   14.79    0.97
   9   5   3   15.24    0.78
  -9   5  -3   15.61    1.00
 -11  -5  -3   18.57    0.93
 -11  -5  -3   18.82    0.87
  11  -5   3   18.37    1.16
 -11   5  -3   20.24    1.14
  11   5   3   19.50    0.85
 -11   5  -3   20.27    1.03
  11   5   3   17.61    0.84
 -11   5  -3   20.38    1.19
 -13  -5  -3    0.39    0.32
 -13   5  -3   -0.42    0.41
  13   5   3    0.42    0.18
 -15  -5  -3   -0.28    0.32
 -15   5  -3   -0.07    0.52
 -17  -5  -3    0.66    0.38
 -17   5  -3    0.65    0.63
 -19  -5  -3    0.73    0.39
 -19   5  -3    0.50    0.66
 -22   6   3    0.22    0.65
 -20   6   3   -0.49    0.53
 -18   6   3    1.25    0.60
  16  -6  -3    0.05    0.40
 -16  -6   3   -0.10    0.20
 -16   6   3    0.74    0.50
 -14  -6   3    0.76    0.23
  14  -6  -3    0.88    0.42
  14  -6  -3    0.74    0.36
 -14  -6   3    0.65    0.23
 -14  -6   3    0.45    0.31
 -14  -6   3    0.52    0.23
 -14   6   3    0.91    0.41
 -14   6   3    0.37    0.41
  12  -6  -3    0.37    0.32
 -12  -6   3    0.22    0.23
 -12  -6   3    0.71    0.23
  12  -6  -3    0.37    0.31
 -12  -6   3    0.48    0.17
  12  -6  -3    0.77    0.39
 -12  -6   3    0.19    0.21
 -12  -6   3    0.40    0.30
  12  -6  -3    0.18    0.21
 -12   6   3    0.24    0.33
  12   6  -3    0.38    0.18
 -12   6   3    0.56    0.38
  12   6  -3    0.38    0.16
  10  -6  -3   11.76    0.80
 -10  -6   3   10.80    0.58
 -10  -6   3   11.70    0.63
 -10  -6   3   11.34    0.77
  10  -6  -3   13.34    0.87
  10  -6  -3   12.49    0.69
 -10  -6   3   11.50    0.62
  10   6  -3   10.93    0.62
 -10   6   3   13.43    0.86
 -10   6   3   10.41    0.85
 -10   6   3   10.53    0.79
  10   6  -3   10.16    0.58
   8  -6  -3    0.69    0.31
   8  -6  -3    0.50    0.28
  -8  -6   3    0.69    0.24
  -8  -6   3    0.73    0.24
  -8  -6   3    0.14    0.26
   8  -6  -3    0.65    0.33
  -8  -6   3    0.52    0.25
  -8   6   3    1.04    0.33
   8   6  -3    0.71    0.25
  -8   6   3    1.20    0.37
   8   6  -3    0.56    0.18
   8   6  -3    0.23    0.21
  -8   6   3    0.92    0.33
   6  -6  -3   13.00    0.83
  -6  -6   3   11.16    0.77
  -6  -6   3   12.08    0.66
  -6  -6   3   11.60    0.66
  -6  -6   3   11.91    0.69
   6  -6  -3   14.43    0.84
   6  -6  -3   12.75    0.79
  -6   6   3   13.90    0.84
  -6   6   3   11.68    0.75
   6   6  -3   12.74    0.71
   6   6  -3   12.18    0.70
  -6   6   3   11.49    0.81
   6   6  -3   11.80    0.78
   4  -6  -3    3.79    0.46
  -4  -6   3    4.08    0.48
   4  -6  -3    3.03    0.44
  -4  -6   3    3.07    0.39
   4  -6  -3    3.55    0.48
  -4  -6   3    3.10    0.40
  -4  -6   3    3.40    0.42
   4   6  -3    4.10    0.49
  -4   6   3    3.67    0.47
   4   6  -3    3.19    0.40
  -4   6   3    3.40    0.46
  -4   6   3    3.71    0.49
   4   6  -3    3.37    0.39
  -2  -6   3   83.51    3.08
   2  -6  -3   86.71    3.11
  -2  -6   3   87.74    2.96
   2  -6  -3   88.52    2.99
   2  -6  -3   85.64    3.12
   2   6  -3   94.06    3.19
  -2   6   3   83.80    2.96
  -2   6   3   89.81    3.13
   2   6  -3   83.51    3.08
   2   6  -3   86.48    2.97
  -2   6   3   91.61    3.15
   2   6  -3   83.76    3.09
   0  -6   3    7.66    0.63
   0  -6  -3    8.80    0.61
   0  -6  -3    7.91    0.60
   0  -6  -3    8.44    0.60
   0  -6   3    5.47    0.59
   0   6  -3    8.54    0.63
   0   6  -3    8.54    0.70
   0   6   3    8.66    0.68
   0   6   3    7.86    0.60
   0   6  -3    8.82    0.66
   0   6   3    6.81    0.61
   0   6   3    9.28    0.61
   0   6  -3    9.48    0.64
  -2  -6  -3   40.25    1.67
   2  -6   3   41.58    1.65
  -2  -6  -3   45.96    1.64
   2  -6   3   41.64    1.77
  -2  -6  -3   46.64    1.71
   2  -6   3   40.70    1.57
   2   6   3   40.92    1.69
   2   6   3   42.84    1.60
  -2   6  -3   44.06    1.80
   2   6   3   40.94    1.76
  -2   6  -3   40.22    1.69
  -2   6  -3   43.55    1.78
  -2   6  -3   40.44    1.73
  -4  -6  -3    2.29    0.36
  -4  -6  -3    3.05    0.39
   4  -6   3    2.41    0.43
  -4  -6  -3    1.85    0.35
   4  -6   3    2.28    0.39
  -4  -6  -3    2.34    0.36
  -4   6  -3    2.62    0.42
   4   6   3    2.47    0.27
  -4   6  -3    1.81    0.40
   4   6   3    2.00    0.35
  -4   6  -3    2.23    0.43
   4   6   3    2.10    0.31
   4   6   3    1.88    0.41
  -4   6  -3    2.24    0.43
   4   6   3    2.41    0.36
  -6  -6  -3    6.13    0.51
  -6  -6  -3    5.26    0.51
   6  -6   3    6.65    0.62
   6  -6   3    5.07    0.62
  -6  -6  -3    4.95    0.49
  -6   6  -3    6.06    0.68
   6   6   3    4.81    0.50
   6   6   3    5.99    0.45
  -6   6  -3    6.53    0.66
  -6   6  -3    4.73    0.55
  -6   6  -3    5.35    0.63
   6   6   3    5.43    0.52
   6   6   3    5.77    0.30
   8  -6   3    4.41    0.61
   8  -6   3    4.98    0.58
  -8  -6  -3    4.98    0.48
  -8  -6  -3    4.97    0.50
  -8  -6  -3    5.86    0.50
  -8   6  -3    5.66    0.69
   8   6   3    5.23    0.49
  -8   6  -3    5.48    0.58
  -8   6  -3    4.99    0.61
   8   6   3    5.06    0.49
  10  -6   3   15.19    0.91
 -10  -6  -3   14.00    0.77
 -10  -6  -3   14.16    0.81
  10  -6   3   16.39    1.08
 -10   6  -3   15.04    1.07
  10   6   3   13.63    0.75
  10   6   3   14.15    0.75
 -10   6  -3   15.75    1.02
 -10   6  -3   15.03    0.91
 -12  -6  -3    0.95    0.34
  12   6   3    1.76    0.28
 -12   6  -3    1.48    0.55
  12   6   3    1.45    0.29
 -14  -6  -3    0.30    0.33
 -14   6  -3    0.00    0.51
 -16  -6  -3    0.18    0.36
 -16   6  -3    0.25    0.57
 -18  -6  -3    0.29    0.37
 -18   6  -3    0.37    0.62
 -21   7   3    0.01    0.64
 -19   7   3   -0.73    0.52
  17  -7  -3    0.44    0.47
 -17  -7   3    0.45    0.24
 -17   7   3    0.36    0.53
 -15  -7   3   -0.38    0.23
  15  -7  -3   -0.06    0.39
 -15  -7   3    0.01    0.31
 -15   7   3    0.38    0.47
 -13  -7   3    1.66    0.32
  13  -7  -3    1.89    0.44
  13  -7  -3    1.58    0.46
 -13  -7   3    1.65    0.23
  13  -7  -3    1.35    0.46
 -13  -7   3    1.50    0.30
 -13  -7   3    2.00    0.43
  13  -7  -3    1.84    0.32
  13   7  -3    1.74    0.21
 -13   7   3    1.71    0.49
  13   7  -3    2.19    0.24
 -13   7   3    1.91    0.51
 -11  -7   3    4.10    0.59
 -11  -7   3    5.10    0.47
  11  -7  -3    3.67    0.56
  11  -7  -3    4.62    0.49
  11  -7  -3    5.27    0.63
 -11  -7   3    5.26    0.47
  11  -7  -3    4.93    0.69
  11   7  -3    4.97    0.43
 -11   7   3    5.87    0.70
 -11   7   3    6.04    0.70
  11   7  -3    4.47    0.44
  -9  -7   3   20.57    0.95
   9  -7  -3   22.36    1.19
   9  -7  -3   18.52    1.16
  -9  -7   3   21.13    0.95
  -9  -7   3   21.17    1.15
   9  -7  -3   22.43    1.14
  -9   7   3   21.43    1.20
   9   7  -3   19.00    0.94
  -9   7   3   21.03    1.18
  -9   7   3   19.79    1.14
   9   7  -3   19.87    0.97
   7  -7  -3   15.09    0.96
   7  -7  -3   15.09    0.93
  -7  -7   3   16.43    0.83
   7  -7  -3   15.40    0.99
  -7  -7   3   15.55    0.95
  -7  -7   3   15.31    0.82
  -7  -7   3   14.28    0.81
  -7   7   3   15.51    0.98
   7   7  -3   14.88    0.83
  -7   7   3   17.48    1.02
  -7   7   3   16.85    0.99
   7   7  -3   14.98    0.84
  -5  -7   3   18.96    0.94
   5  -7  -3   20.31    1.08
  -5  -7   3   19.19    0.95
  -5  -7   3   18.66    1.05
  -5  -7   3   17.70    0.95
   5  -7  -3   18.67    1.07
   5  -7  -3   17.62    1.02
  -5   7   3   19.88    1.02
   5   7  -3   17.99    1.04
   5   7  -3   18.54    0.96
   5   7  -3   19.12    0.96
   5   7  -3   18.76    0.91
  -5   7   3   17.20    1.04
  -5   7   3   20.23    1.10
  -3  -7   3   12.55    0.76
  -3  -7   3   14.13    0.82
   3  -7  -3   14.08    0.82
   3  -7  -3   12.64    0.83
   3  -7  -3   13.04    0.86
  -3  -7   3   12.16    0.83
   3   7  -3   13.94    0.79
  -3   7   3   13.20    0.86
  -3   7   3   13.38    0.87
   3   7  -3   12.80    0.83
  -3   7   3   13.94    0.86
   3   7  -3   13.22    0.82
   3   7  -3   12.78    0.85
   1  -7  -3   25.17    1.15
  -1  -7   3   21.94    1.17
  -1  -7   3   23.84    1.11
   1  -7  -3   25.19    1.19
  -1  -7   3   22.81    1.15
   1  -7  -3   21.89    1.16
  -1   7   3   23.16    1.18
  -1   7   3   23.28    1.11
   1   7  -3   23.87    1.18
  -1   7   3   24.37    1.18
   1   7  -3   23.96    1.20
  -1   7   3   22.42    1.07
   1   7  -3   24.26    1.19
   1   7  -3   23.22    1.13
   1  -7   3   11.72    0.81
  -1  -7  -3   12.98    0.79
   1  -7   3   12.05    0.82
   1  -7   3   12.95    0.61
  -1  -7  -3   11.36    0.77
  -1  -7  -3   12.84    0.80
   1   7   3   14.04    0.84
  -1   7  -3   11.86    0.84
   1   7   3   13.34    0.79
   1   7   3   13.66    0.81
  -1   7  -3   13.89    0.88
  -1   7  -3   13.19    0.86
  -1   7  -3   12.83    0.86
   1   7   3   14.25    0.79
  -3  -7  -3   19.47    0.99
   3  -7   3   19.99    1.07
   3  -7   3   20.87    1.15
  -3  -7  -3   20.31    1.05
   3  -7   3   21.08    0.89
  -3  -7  -3   21.77    1.06
   3   7   3   21.39    1.07
  -3   7  -3   20.23    1.11
   3   7   3   21.08    1.14
  -3   7  -3   18.97    1.11
  -3   7  -3   21.21    1.17
   3   7   3   21.51    1.08
  -3   7  -3   21.40    1.13
   3   7   3   21.99    0.88
   3   7   3   20.66    0.99
  -5  -7  -3    1.09    0.32
   5  -7   3    0.72    0.36
  -5  -7  -3    0.97    0.30
   5  -7   3    0.99    0.39
  -5  -7  -3    1.17    0.34
   5   7   3    1.12    0.21
  -5   7  -3    1.57    0.43
   5   7   3    1.42    0.34
  -5   7  -3    1.59    0.44
  -5   7  -3    1.94    0.41
   5   7   3    1.38    0.33
  -5   7  -3    0.74    0.33
   7  -7   3    5.01    0.61
  -7  -7  -3    3.82    0.46
  -7  -7  -3    4.44    0.51
  -7  -7  -3    4.25    0.48
   7  -7   3    5.44    0.71
  -7   7  -3    4.31    0.56
   7   7   3    3.99    0.49
   7   7   3    5.25    0.41
  -7   7  -3    5.20    0.71
  -7   7  -3    4.15    0.61
   7   7   3    4.53    0.51
  -9  -7  -3    1.01    0.35
   9  -7   3    0.93    0.45
  -9  -7  -3    1.45    0.33
   9  -7   3    2.21    0.47
  -9   7  -3    1.97    0.50
  -9   7  -3    2.02    0.43
   9   7   3    1.53    0.35
   9   7   3    1.03    0.31
  -9   7  -3    1.51    0.49
 -11  -7  -3    0.81    0.29
 -11  -7  -3    1.22    0.38
  11   7   3    1.19    0.29
  11   7   3    1.02    0.31
 -11   7  -3    1.52    0.42
 -11   7  -3    1.63    0.55
 -13  -7  -3    0.02    0.34
  13   7   3    0.11    0.21
  13   7   3    0.05    0.21
 -13   7  -3    0.39    0.54
 -15  -7  -3    0.38    0.38
 -15   7  -3   -0.03    0.52
 -17  -7  -3   -0.38    0.34
 -17   7  -3    0.21    0.64
 -19   7  -3   -0.22    0.65
 -22   8   3   -0.07    0.65
 -20   8   3   -0.56    0.57
 -18  -8   3    0.04    0.25
 -18   8   3    0.31    0.60
 -16  -8   3    0.40    0.29
 -16  -8   3    1.03    0.42
  16  -8  -3    0.40    0.47
 -16   8   3    0.55    0.56
 -14  -8   3    6.92    0.57
 -14  -8   3    8.37    0.79
  14  -8  -3    5.35    0.79
 -14   8   3    5.92    0.83
  12  -8  -3    0.20    0.40
  12  -8  -3    0.00    0.33
  12  -8  -3    0.27    0.28
 -12  -8   3    0.79    0.38
  12  -8  -3    0.12    0.35
 -12  -8   3    0.52    0.31
  12   8  -3   -0.08    0.21
  12   8  -3    0.29    0.25
 -12   8   3    0.03    0.35
 -12   8   3    0.33    0.45
 -10  -8   3   13.93    0.83
  10  -8  -3   15.53    0.91
  10  -8  -3   16.21    1.08
  10  -8  -3   15.92    1.06
  10  -8  -3   15.11    1.00
 -10  -8   3   17.00    0.86
 -10  -8   3   14.15    0.97
  10   8  -3   16.02    0.87
  10   8  -3   13.76    0.79
 -10   8   3   14.92    1.02
 -10   8   3   15.62    1.07
  -8  -8   3    1.49    0.43
   8  -8  -3    1.13    0.42
  -8  -8   3    1.04    0.33
   8  -8  -3    1.16    0.41
  -8  -8   3    1.23    0.32
   8  -8  -3    1.67    0.45
   8   8  -3    1.21    0.33
  -8   8   3    0.67    0.38
   8   8  -3    1.59    0.29
   8   8  -3    1.53    0.34
  -8   8   3    1.67    0.45
  -8   8   3    1.45    0.43
   6  -8  -3   30.12    1.49
   6  -8  -3   30.08    1.47
   6  -8  -3   28.74    1.40
  -6  -8   3   25.73    1.40
  -6  -8   3   30.36    1.34
  -6  -8   3   29.61    1.27
  -6   8   3   29.93    1.43
  -6   8   3   28.03    1.45
   6   8  -3   26.80    1.32
   6   8  -3   28.49    1.21
   6   8  -3   27.98    1.31
  -6   8   3   28.83    1.46
   4  -8  -3    0.82    0.34
  -4  -8   3    1.48    0.41
   4  -8  -3    1.53    0.40
  -4  -8   3    1.55    0.38
   4  -8  -3    1.13    0.39
  -4  -8   3    1.42    0.37
  -4   8   3    0.87    0.35
  -4   8   3    1.55    0.41
   4   8  -3    1.22    0.35
   4   8  -3    1.33    0.38
   4   8  -3    1.98    0.40
  -4   8   3    1.67    0.43
   4   8  -3    1.36    0.35
   2  -8  -3    0.30    0.28
  -2  -8   3    0.33    0.29
  -2  -8   3    0.69    0.30
   2  -8  -3    0.71    0.34
  -2  -8   3    0.62    0.34
   2  -8  -3    0.40    0.32
  -2   8   3    0.38    0.33
  -2   8   3    0.83    0.35
   2   8  -3    0.13    0.27
   2   8  -3    0.12    0.28
   2   8  -3    0.29    0.29
   2   8  -3    0.68    0.29
  -2   8   3    0.48    0.32
  -2   8   3    0.67    0.25
   0  -8   3    1.23    0.37
   0  -8  -3    0.81    0.32
   0  -8  -3    1.57    0.38
   0  -8   3    0.80    0.33
   0  -8  -3    1.21    0.33
   0  -8   3    0.61    0.32
   0   8  -3    1.76    0.42
   0   8   3    1.47    0.38
   0   8  -3    0.89    0.34
   0   8   3    1.73    0.40
   0   8  -3    0.99    0.34
   0   8  -3    1.76    0.42
   0   8   3    1.31    0.31
   0   8   3    0.00    0.27
  -2  -8  -3    0.02    0.27
   2  -8   3    0.09    0.13
   2  -8   3    0.63    0.33
   2  -8   3    0.19    0.31
  -2  -8  -3   -0.33    0.21
  -2  -8  -3    0.02    0.22
   2   8   3    0.12    0.26
   2   8   3    0.08    0.23
   2   8   3    0.07    0.25
   2   8   3    0.05    0.29
  -2   8  -3    0.23    0.32
  -2   8  -3    0.01    0.28
  -2   8  -3    0.02    0.28
  -2   8  -3   -0.08    0.29
   4  -8   3    0.95    0.40
  -4  -8  -3    1.36    0.35
   4  -8   3    0.41    0.38
  -4  -8  -3    0.85    0.33
  -4   8  -3    1.00    0.36
  -4   8  -3    0.26    0.32
   4   8   3    0.72    0.32
   4   8   3    0.48    0.33
   4   8   3    0.84    0.30
  -4   8  -3    0.88    0.38
  -4   8  -3    1.20    0.43
   4   8   3    0.59    0.22
  -6  -8  -3    0.92    0.34
  -6  -8  -3    1.49    0.39
  -6  -8  -3    2.06    0.40
   6  -8   3    1.90    0.48
   6  -8   3    1.30    0.45
  -6   8  -3    2.91    0.55
   6   8   3    1.72    0.21
   6   8   3    1.71    0.40
  -6   8  -3    2.07    0.51
   6   8   3    1.56    0.37
   6   8   3    1.78    0.34
  -6   8  -3    2.23    0.46
  -6   8  -3    1.29    0.43
   8  -8   3    0.51    0.40
  -8  -8  -3    0.67    0.36
   8  -8   3    0.39    0.38
  -8  -8  -3    0.84    0.31
  -8   8  -3    0.20    0.36
   8   8   3    0.28    0.29
  -8   8  -3    0.70    0.47
   8   8   3    0.55    0.32
  -8   8  -3    0.77    0.37
 -10  -8  -3    0.40    0.30
  10  -8   3   -0.01    0.40
 -10  -8  -3    0.85    0.38
  10   8   3    1.02    0.32
 -10   8  -3    0.48    0.38
 -10   8  -3    0.15    0.48
  10   8   3    0.42    0.31
 -12  -8  -3    2.27    0.46
 -12   8  -3    3.10    0.71
  12   8   3    1.78    0.36
  12   8   3    1.87    0.35
 -14  -8  -3    0.68    0.41
 -14   8  -3   -0.55    0.54
 -16  -8  -3    0.16    0.40
 -16   8  -3    0.39    0.62
 -18  -8  -3    0.03    0.40
 -18   8  -3    0.79    0.74
 -21   9   3    0.27    0.71
 -19  -9   3    1.14    0.31
 -19   9   3    1.06    0.73
 -17  -9   3    2.01    0.39
  17  -9  -3    2.03    0.68
 -17   9   3    0.48    0.63
 -15  -9   3   -0.28    0.37
  15  -9  -3    0.15    0.44
 -15  -9   3    0.23    0.32
 -15   9   3   -0.94    0.45
  13  -9  -3   -0.02    0.46
 -13  -9   3    0.37    0.33
 -13  -9   3   -0.29    0.34
  13  -9  -3    0.41    0.32
 -13   9   3   -0.40    0.44
  13   9  -3    0.10    0.23
  13   9  -3   -0.31    0.24
  11  -9  -3    6.15    0.82
 -11  -9   3    3.91    0.62
  11  -9  -3    4.84    0.68
  11  -9  -3    4.00    0.65
 -11  -9   3    3.97    0.53
  11  -9  -3    4.55    0.58
 -11   9   3    4.14    0.71
  11   9  -3    4.78    0.55
  11   9  -3    4.12    0.49
 -11   9   3    4.68    0.73
  -9  -9   3    4.42    0.65
   9  -9  -3    4.72    0.69
   9  -9  -3    4.28    0.67
   9  -9  -3    4.00    0.55
  -9  -9   3    4.46    0.52
   9  -9  -3    5.46    0.70
  -9  -9   3    4.65    0.56
   9   9  -3    4.20    0.54
  -9   9   3    3.89    0.67
  -9   9   3    3.07    0.62
   9   9  -3    3.89    0.50
  -7  -9   3    1.63    0.39
  -7  -9   3    1.49    0.43
   7  -9  -3    1.04    0.43
   7  -9  -3    0.90    0.44
   7  -9  -3    0.66    0.40
  -7   9   3    0.87    0.44
   7   9  -3    0.96    0.35
  -7   9   3    0.97    0.43
  -7   9   3    0.56    0.40
   7   9  -3    1.10    0.35
   7   9  -3    0.72    0.29
   5  -9  -3    0.10    0.31
  -5  -9   3   -0.08    0.31
  -5  -9   3    0.19    0.32
   5  -9  -3    0.19    0.36
   5  -9  -3    0.36    0.32
  -5   9   3    0.55    0.38
   5   9  -3   -0.08    0.27
  -5   9   3   -0.29    0.31
   5   9  -3    0.39    0.32
  -5   9   3   -0.41    0.27
   5   9  -3    0.13    0.16
   3  -9  -3    2.12    0.48
  -3  -9   3    2.17    0.47
  -3  -9   3    2.81    0.50
   3  -9  -3    1.86    0.43
   3  -9  -3    2.45    0.51
  -3  -9   3    1.71    0.45
   3   9  -3    2.37    0.47
   3   9  -3    3.01    0.51
  -3   9   3    3.08    0.53
  -3   9   3    1.97    0.47
  -3   9   3    1.88    0.46
  -3   9   3    2.32    0.36
   3   9  -3    3.11    0.50
   1  -9  -3   -0.35    0.28
   1  -9  -3   -0.08    0.26
  -1  -9   3    0.21    0.30
  -1  -9   3   -0.08    0.29
   1  -9  -3   -0.19    0.26
  -1  -9   3    0.23    0.31
   1   9  -3   -0.26    0.27
  -1   9   3   -0.07    0.29
   1   9  -3   -0.02    0.28
  -1   9   3   -0.01    0.31
   1   9  -3   -0.47    0.25
  -1   9   3    0.07    0.30
  -1   9   3    0.08    0.21
   1   9  -3    0.16    0.34
  -1  -9  -3   -0.08    0.27
   1  -9   3    0.06    0.32
  -1  -9  -3    0.11    0.26
   1  -9   3   -0.33    0.31
  -1  -9  -3   -0.01    0.25
   1   9   3   -0.17    0.30
  -1   9  -3    0.21    0.32
  -1   9  -3   -0.72    0.26
   1   9   3   -0.06    0.23
  -1   9  -3   -0.46    0.25
   1   9   3    0.29    0.31
  -1   9  -3    0.48    0.38
   1   9   3   -0.24    0.27
   3  -9   3    0.07    0.39
  -3  -9  -3   -0.06    0.28
  -3  -9  -3    0.10    0.31
   3  -9   3   -0.27    0.27
   3   9   3    0.25    0.23
   3   9   3    0.14    0.29
   3   9   3    0.54    0.37
  -3   9  -3    0.15    0.39
  -3   9  -3   -0.39    0.27
  -3   9  -3    0.40    0.38
  -3   9  -3   -0.17    0.29
  -5  -9  -3    6.99    0.71
  -5  -9  -3    7.26    0.72
   5  -9   3    7.91    0.81
   5  -9   3    8.10    0.90
  -5   9  -3    7.54    0.84
   5   9   3    7.28    0.72
   5   9   3    7.47    0.65
   5   9   3    7.52    0.74
  -5   9  -3    7.33    0.84
  -5   9  -3    9.22    0.86
   5   9   3    8.17    0.48
  -5   9  -3    8.30    0.89
  -7  -9  -3    5.49    0.61
  -7  -9  -3    5.17    0.62
   7  -9   3    5.81    0.79
   7  -9   3    6.04    0.74
  -7   9  -3    5.01    0.67
   7   9   3    4.75    0.58
   7   9   3    4.87    0.60
  -7   9  -3    4.11    0.68
  -7   9  -3    5.02    0.78
  -9  -9  -3    0.33    0.32
  -9  -9  -3    0.36    0.36
   9  -9   3   -0.60    0.37
   9   9   3    0.76    0.35
  -9   9  -3    0.75    0.42
   9   9   3    0.31    0.31
  -9   9  -3    0.74    0.49
 -11  -9  -3    0.55    0.40
  11   9   3    0.69    0.34
 -11   9  -3   -0.34    0.50
  11   9   3    0.46    0.30
 -13  -9  -3    2.52    0.51
  13   9   3    1.95    0.34
  13   9   3    2.27    0.37
 -13   9  -3    2.01    0.72
 -15  -9  -3    0.76    0.46
 -15   9  -3    0.37    0.65
 -17  -9  -3    0.81    0.42
 -17   9  -3   -0.10    0.67
 -20  10   3    0.04    0.70
 -18 -10   3   -0.06    0.35
 -18  10   3   -0.59    0.56
 -16 -10   3    1.20    0.40
 -16 -10   3    1.09    0.50
  16 -10  -3    1.43    0.64
 -16  10   3    1.12    0.66
 -14 -10   3   -0.26    0.34
 -14 -10   3    0.31    0.44
  14 -10  -3    0.26    0.53
 -14  10   3    0.77    0.58
  14  10  -3   -0.03    0.27
  14  10  -3   -0.03    0.24
  12 -10  -3    0.60    0.49
  12 -10  -3    0.54    0.49
 -12 -10   3    0.17    0.36
  12 -10  -3    0.12    0.34
 -12 -10   3    0.65    0.43
  12  10  -3    0.66    0.33
 -12  10   3    0.03    0.50
  12  10  -3    0.74    0.35
  10 -10  -3    2.59    0.52
 -10 -10   3    1.98    0.55
  10 -10  -3    3.98    0.67
 -10 -10   3    3.03    0.51
  10 -10  -3    3.77    0.74
  10  10  -3    2.32    0.48
 -10  10   3    3.60    0.66
  10  10  -3    3.08    0.48
 -10  10   3    2.03    0.61
  -8 -10   3    0.63    0.42
   8 -10  -3    1.44    0.47
   8 -10  -3    1.55    0.43
   8 -10  -3    1.55    0.51
   8 -10  -3    1.59    0.50
  -8 -10   3    1.80    0.46
  -8  10   3    0.71    0.44
  -8  10   3    2.42    0.60
   8  10  -3    2.26    0.46
  -8  10   3    1.26    0.47
   8  10  -3    1.85    0.44
   6 -10  -3    2.04    0.53
   6 -10  -3    1.62    0.47
  -6 -10   3    1.62    0.44
   6 -10  -3    2.56    0.56
  -6 -10   3    1.90    0.50
   6  10  -3    2.30    0.49
   6  10  -3    1.57    0.41
  -6  10   3    2.32    0.53
   6  10  -3    2.01    0.43
  -6  10   3    2.09    0.55
  -6  10   3    3.50    0.62
  -4 -10   3    0.45    0.37
   4 -10  -3    0.91    0.39
   4 -10  -3    0.07    0.33
   4 -10  -3    0.07    0.33
  -4 -10   3    0.17    0.35
   4  10  -3    0.39    0.34
  -4  10   3   -0.10    0.22
   4  10  -3    0.29    0.35
  -4  10   3   -0.11    0.35
   4  10  -3    0.19    0.30
  -4  10   3    0.21    0.37
  -4  10   3    0.41    0.37
  -2 -10   3    8.73    0.90
   2 -10  -3    9.77    0.90
  -2 -10   3   10.80    0.94
   2 -10  -3   11.45    1.03
  -2 -10   3    7.91    0.81
   2 -10  -3    9.89    0.91
  -2  10   3    9.87    0.95
   2  10  -3   10.26    0.92
  -2  10   3   11.22    0.93
  -2  10   3   11.28    0.67
   2  10  -3    8.50    0.86
   2  10  -3    8.84    0.85
   0 -10   3    2.16    0.51
   0 -10  -3    1.59    0.43
   0 -10   3    1.72    0.47
   0 -10  -3    1.06    0.40
   0 -10  -3    2.26    0.51
   0 -10   3    1.60    0.47
   0  10   3    1.84    0.37
   0  10   3    1.09    0.43
   0  10   3    1.68    0.48
   0  10  -3    2.16    0.52
   0  10  -3    1.13    0.46
   0  10  -3    2.40    0.55
   0  10   3    1.79    0.46
   2 -10   3   11.36    1.03
  -2 -10  -3   11.53    0.93
   2 -10   3   11.05    0.97
  -2 -10  -3   10.75    0.95
  -2  10  -3   10.29    0.99
  -2  10  -3    9.93    0.99
   2  10   3    9.75    0.91
  -2  10  -3   11.21    1.06
   2  10   3   11.19    0.90
   2  10   3   10.48    0.94
  -2  10  -3   10.40    0.99
  -4 -10  -3    0.14    0.31
   4 -10   3   -0.12    0.42
   4 -10   3   -0.09    0.37
  -4 -10  -3    0.27    0.38
   4  10   3    0.42    0.33
  -4  10  -3    0.54    0.41
  -4  10  -3   -0.38    0.34
   4  10   3    0.02    0.31
  -4  10  -3   -0.19    0.42
   4  10   3    0.22    0.31
  -6 -10  -3    0.39    0.33
  -6 -10  -3    0.37    0.37
   6 -10   3    0.38    0.41
   6 -10   3    1.00    0.49
  -6  10  -3    0.33    0.46
  -6  10  -3    0.44    0.48
   6  10   3    0.03    0.34
   6  10   3    0.13    0.33
   6  10   3    0.41    0.21
   8 -10   3    3.25    0.65
  -8 -10  -3    3.35    0.56
  -8  10  -3    2.54    0.66
   8  10   3    3.04    0.50
   8  10   3    3.21    0.53
  -8  10  -3    2.17    0.59
 -10 -10  -3    1.81    0.49
  10  10   3    1.29    0.40
  10  10   3    1.29    0.41
 -10  10  -3    1.15    0.63
 -12 -10  -3    0.23    0.40
 -12  10  -3    0.71    0.66
  12  10   3    0.09    0.32
 -14 -10  -3    0.10    0.43
 -14  10  -3    0.94    0.72
  14  10   3   -0.17    0.23
 -16 -10  -3   -0.05    0.43
 -16  10  -3    0.05    0.71
 -19 -11   3   -0.02    0.37
 -19  11   3   -0.67    0.68
 -17 -11   3    0.14    0.39
 -17  11   3    0.25    0.68
  15 -11  -3   -0.95    0.50
 -15 -11   3    0.23    0.40
 -15 -11   3    1.23    0.53
  15  11  -3    0.69    0.29
  15  11  -3    0.67    0.27
 -15  11   3   -0.04    0.65
 -13 -11   3    0.16    0.44
 -13 -11   3    0.54    0.44
  13 -11  -3    0.58    0.58
  13  11  -3   -0.13    0.33
  13  11  -3    0.61    0.34
 -13  11   3   -0.38    0.55
 -11 -11   3   -0.18    0.39
  11 -11  -3    0.13    0.36
  11 -11  -3    0.38    0.48
 -11 -11   3    0.49    0.45
  11 -11  -3    0.09    0.48
  11  11  -3    0.34    0.35
  11  11  -3    0.14    0.34
 -11  11   3    0.32    0.54
   9 -11  -3    1.95    0.61
  -9 -11   3    2.03    0.51
   9 -11  -3    2.63    0.55
  -9 -11   3    3.02    0.62
   9 -11  -3    2.44    0.63
   9  11  -3    2.11    0.50
  -9  11   3    2.28    0.65
  -9  11   3    2.04    0.60
   9  11  -3    2.48    0.50
   7 -11  -3    1.55    0.52
  -7 -11   3    1.81    0.48
   7 -11  -3    1.64    0.58
   7 -11  -3    1.24    0.45
  -7 -11   3    0.89    0.48
   7 -11  -3    1.23    0.51
  -7  11   3    0.61    0.46
   7  11  -3    1.68    0.47
  -7  11   3    1.98    0.56
   7  11  -3    2.66    0.53
  -7  11   3    2.26    0.65
   5 -11  -3    6.11    0.81
  -5 -11   3    6.29    0.73
   5 -11  -3    5.42    0.79
  -5 -11   3    4.90    0.74
   5 -11  -3    5.96    0.80
  -5  11   3    6.10    0.80
  -5  11   3    6.13    0.49
  -5  11   3    5.75    0.80
   5  11  -3    5.72    0.73
   5  11  -3    5.95    0.70
  -5  11   3    5.29    0.77
   3 -11  -3    0.32    0.36
   3 -11  -3    0.38    0.44
  -3 -11   3    0.27    0.39
   3 -11  -3    0.07    0.35
  -3 -11   3    0.15    0.40
  -3  11   3    0.31    0.23
  -3  11   3    0.40    0.42
   3  11  -3    0.50    0.43
  -3  11   3   -0.40    0.37
  -3  11   3    0.00    0.36
   3  11  -3   -0.08    0.35
   3  11  -3    0.32    0.36
  -1 -11   3    9.04    0.95
   1 -11  -3    7.43    0.81
   1 -11  -3   11.17    1.01
   1 -11  -3    7.63    0.86
  -1 -11   3    6.78    0.84
  -1 -11   3    8.84    0.92
  -1  11   3   10.07    0.93
  -1  11   3    8.39    0.65
  -1  11   3   10.29    0.98
   1  11  -3    9.80    0.92
   1  11  -3   10.97    1.03
  -1  11   3    8.16    0.89
   1  11  -3   10.84    1.00
   1 -11   3    0.44    0.46
   1 -11   3    0.81    0.42
  -1 -11  -3   -0.16    0.37
  -1 -11  -3    0.47    0.42
   1 -11   3    0.37    0.39
   1  11   3    0.71    0.42
  -1  11  -3    0.64    0.43
   1  11   3    0.98    0.44
  -1  11  -3    0.76    0.44
   1  11   3   -0.25    0.35
  -1  11  -3    0.79    0.45
  -3 -11  -3   -0.32    0.37
   3 -11   3   -0.26    0.44
  -3 -11  -3    0.73    0.41
   3 -11   3    0.56    0.42
  -3  11  -3    1.05    0.53
   3  11   3    0.72    0.41
  -3  11  -3    0.23    0.45
   3  11   3    0.64    0.36
  -3  11  -3    0.03    0.38
   3  11   3   -0.10    0.11
   5 -11   3    1.76    0.60
  -5 -11  -3    2.12    0.51
   5 -11   3    2.31    0.60
  -5 -11  -3    1.85    0.51
   5  11   3    3.31    0.58
  -5  11  -3    1.07    0.52
  -5  11  -3    2.14    0.61
   5  11   3    2.06    0.51
  -5  11  -3    1.31    0.51
  -7 -11  -3    0.24    0.40
   7 -11   3   -0.22    0.46
   7  11   3    0.06    0.36
  -7  11  -3   -0.43    0.44
  -7  11  -3    0.39    0.51
   9 -11   3    3.80    0.74
  -9 -11  -3    4.70    0.67
  -9  11  -3    3.06    0.78
   9  11   3    3.47    0.56
 -11 -11  -3   -0.03    0.42
  11  11   3    0.27    0.38
 -11  11  -3   -0.70    0.57
 -13 -11  -3    0.34    0.48
 -13  11  -3    0.68    0.69
 -15 -11  -3    0.26    0.48
 -15  11  -3    0.10    0.67
 -17 -11  -3   -0.56    0.46
 -17  11  -3    1.24    0.82
 -18 -12   3   -0.14    0.42
 -18  12   3    0.21    0.69
 -16 -12   3   -0.72    0.45
 -16 -12   3    0.13    0.44
 -16  12   3    0.36    0.68
 -14 -12   3    7.01    0.95
 -14 -12   3    6.81    0.77
  14 -12  -3    6.97    1.05
  14  12  -3    8.54    0.70
 -14  12   3    6.55    1.05
 -12 -12   3    1.31    0.57
 -12 -12   3    1.89    0.57
  12 -12  -3    1.84    0.54
  12 -12  -3    2.68    0.76
 -12  12   3    1.87    0.74
  12  12  -3    2.29    0.50
 -10 -12   3    6.26    0.87
  10 -12  -3    7.91    1.03
  10 -12  -3    7.49    0.94
 -10 -12   3    7.22    0.81
  10 -12  -3    8.47    0.93
 -10  12   3    6.83    0.97
  10  12  -3    6.23    0.74
   8 -12  -3    0.14    0.50
  -8 -12   3    0.07    0.41
   8 -12  -3   -0.21    0.47
   8 -12  -3    0.28    0.42
  -8 -12   3   -0.33    0.41
  -8  12   3    0.53    0.56
   8  12  -3    0.41    0.41
  -8  12   3    0.23    0.50
  -6 -12   3   34.84    1.70
   6 -12  -3   34.77    1.81
   6 -12  -3   32.91    1.74
   6 -12  -3   36.00    1.92
  -6 -12   3   34.91    1.90
   6 -12  -3   35.37    1.88
   6  12  -3   33.71    1.72
  -6  12   3   32.94    1.81
  -6  12   3   33.59    1.34
  -6  12   3   32.25    1.85
  -6  12   3   34.30    1.88
   4 -12  -3    1.25    0.49
  -4 -12   3    0.89    0.50
   4 -12  -3    0.86    0.49
  -4 -12   3    0.84    0.48
   4 -12  -3    1.21    0.54
   4  12  -3    0.45    0.39
  -4  12   3    0.91    0.50
  -4  12   3    1.31    0.52
   4  12  -3    1.38    0.50
  -4  12   3    1.40    0.28
   4  12  -3    1.30    0.48
  -4  12   3    1.77    0.57
   2 -12  -3   26.82    1.54
  -2 -12   3   22.96    1.41
   2 -12  -3   24.16    1.44
  -2 -12   3   23.18    1.49
   2  12  -3   25.68    1.43
   2  12  -3   25.69    1.53
  -2  12   3   26.04    1.54
   2  12  -3   23.91    1.46
  -2  12   3   24.46    1.42
  -2  12   3   26.47    1.54
   0 -12   3    3.89    0.72
   0 -12  -3    4.01    0.69
   0 -12   3    4.42    0.74
   0 -12  -3    4.49    0.70
   0  12   3    4.45    0.70
   0  12  -3    5.13    0.75
   0  12  -3    3.74    0.72
   0  12   3    4.10    0.70
   0  12  -3    3.40    0.67
   0  12   3    3.58    0.68
   2 -12   3    4.24    0.70
   2 -12   3    2.57    0.64
  -2 -12  -3    3.05    0.59
  -2 -12  -3    1.70    0.55
   2  12   3    3.79    0.68
  -2  12  -3    2.95    0.69
  -2  12  -3    2.24    0.61
  -2  12  -3    2.53    0.63
   2  12   3    2.92    0.57
   4 -12   3    1.04    0.52
   4 -12   3   -0.32    0.37
  -4 -12  -3   -0.01    0.45
  -4  12  -3    0.18    0.50
   4  12   3    0.60    0.43
  -4  12  -3   -0.48    0.38
  -4  12  -3    0.33    0.56
  -6 -12  -3    4.95    0.75
   6 -12   3    4.51    0.81
  -6  12  -3    4.39    0.82
  -6  12  -3    5.72    0.91
   6  12   3    5.15    0.74
   8 -12   3    0.35    0.57
  -8 -12  -3   -0.36    0.43
   8  12   3   -0.54    0.36
  -8  12  -3    0.22    0.59
 -10 -12  -3    0.53    0.48
 -10  12  -3    0.32    0.66
  10  12   3    1.17    0.47
 -12 -12  -3   -0.23    0.48
 -12  12  -3    0.20    0.67
 -14 -12  -3    1.58    0.58
 -14  12  -3   -0.09    0.68
 -16 -12  -3    0.90    0.55
 -16  12  -3    0.48    0.77
 -17 -13   3    0.66    0.49
 -17  13   3   -0.28    0.74
 -15 -13   3    0.24    0.49
 -15 -13   3   -0.10    0.51
 -15  13   3   -0.14    0.63
 -13 -13   3    1.64    0.62
 -13 -13   3    1.74    0.55
  13 -13  -3    0.84    0.63
 -13  13   3    2.32    0.82
  11 -13  -3    2.71    0.76
 -11 -13   3    0.97    0.57
  11 -13  -3    0.40    0.47
 -11 -13   3    1.05    0.53
  11 -13  -3    1.61    0.66
 -11  13   3    0.21    0.59
  11  13  -3    0.78    0.44
   9 -13  -3   -0.18    0.54
  -9 -13   3    0.42    0.50
   9 -13  -3    0.32    0.58
   9 -13  -3   -0.06    0.40
  -9 -13   3    0.72    0.51
  -9  13   3   -0.01    0.57
   9  13  -3   -0.13    0.39
  -7 -13   3    2.74    0.62
   7 -13  -3    1.57    0.54
   7 -13  -3    1.56    0.60
   7 -13  -3    2.99    0.74
  -7 -13   3    2.73    0.68
  -7  13   3    1.80    0.69
   7  13  -3    1.34    0.51
  -7  13   3    1.78    0.64
   5 -13  -3   10.01    1.10
  -5 -13   3    8.95    0.96
   5 -13  -3    7.67    1.02
   5 -13  -3    9.40    1.04
  -5 -13   3    9.58    1.09
   5 -13  -3   10.08    1.07
  -5  13   3   10.08    1.11
   5  13  -3    9.11    0.99
  -5  13   3    7.52    1.01
  -3 -13   3    1.77    0.60
  -3 -13   3    2.33    0.64
   3 -13  -3    1.69    0.61
   3 -13  -3    2.40    0.64
  -3  13   3    1.23    0.59
  -3  13   3    2.69    0.68
   3  13  -3    1.21    0.56
   3  13  -3    2.69    0.63
   1 -13  -3   18.41    1.30
  -1 -13   3   20.00    1.30
  -1 -13   3   18.38    1.35
   1 -13  -3   20.24    1.41
  -1  13   3   19.99    1.38
   1  13  -3   21.13    1.41
   1  13  -3   18.80    1.30
  -1  13   3   18.78    1.30
   1 -13   3   -0.10    0.51
  -1 -13  -3    0.39    0.45
   1 -13   3    0.61    0.51
   1  13   3    0.05    0.44
  -1  13  -3    0.80    0.55
   1  13   3    1.18    0.52
  -1  13  -3    0.86    0.52
   3 -13   3   14.23    1.31
  -3 -13  -3   14.09    1.18
   3  13   3   12.21    1.15
  -3  13  -3   14.67    1.33
  -3  13  -3   14.10    1.33
   5 -13   3    2.91    0.75
  -5 -13  -3    2.46    0.61
  -5  13  -3    2.09    0.71
   5  13   3    2.89    0.65
  -5  13  -3    4.53    0.84
  -7 -13  -3   12.63    1.12
   7 -13   3   12.79    1.24
  -7  13  -3   11.87    1.29
   7  13   3   10.85    1.04
  -9 -13  -3    1.07    0.56
  -9  13  -3   -0.11    0.65
   9  13   3   -0.26    0.39
 -11 -13  -3    1.38    0.58
 -11  13  -3    0.76    0.75
 -13 -13  -3    0.79    0.56
 -13  13  -3    0.50    0.76
 -15 -13  -3    1.51    0.62
 -15  13  -3    0.56    0.83
 -16 -14   3    0.01    0.53
 -16  14   3   -0.73    0.69
 -14 -14   3    1.23    0.59
  14 -14  -3    0.54    0.71
 -14  14   3    1.16    0.79
 -12 -14   3    0.35    0.54
  12 -14  -3    1.29    0.72
 -12  14   3    0.44    0.64
 -10 -14   3    2.19    0.68
 -10 -14   3    1.46    0.61
  10 -14  -3    2.29    0.75
  10 -14  -3    2.46    0.64
  10 -14  -3    3.65    0.87
 -10  14   3    1.49    0.73
  10  14  -3    3.05    0.62
   8 -14  -3    0.39    0.60
  -8 -14   3   -0.02    0.47
  -8 -14   3   -0.16    0.53
   8 -14  -3   -0.15    0.46
   8 -14  -3   -0.04    0.55
  -8  14   3   -1.72    0.51
   8  14  -3    0.05    0.45
  -6 -14   3    8.51    1.10
   6 -14  -3    6.93    1.01
  -6 -14   3    7.79    0.94
   6 -14  -3    9.22    1.14
   6 -14  -3    9.24    1.08
  -6  14   3    6.95    1.02
   6  14  -3    8.63    1.00
  -6  14   3    6.12    0.98
   4 -14  -3    1.05    0.57
   4 -14  -3   -0.31    0.44
  -4 -14   3   -0.08    0.51
  -4 -14   3    0.08    0.48
   4 -14  -3   -0.20    0.54
  -4  14   3   -0.61    0.41
  -4  14   3   -0.54    0.47
   4  14  -3   -0.01    0.50
  -2 -14   3    9.86    1.07
   2 -14  -3    9.64    1.10
  -2 -14   3    9.85    1.14
   2  14  -3   11.25    1.11
  -2  14   3    9.89    1.07
   2  14  -3    9.85    1.11
  -2  14   3   10.28    1.15
   0 -14  -3    0.72    0.51
   0 -14   3    0.87    0.54
   0 -14   3    0.89    0.62
   0  14   3    0.42    0.52
   0  14   3    0.12    0.47
   0  14  -3    0.38    0.52
   0  14  -3    0.39    0.54
  -2 -14  -3    9.70    1.07
   2 -14   3   12.64    1.23
  -2  14  -3   11.85    1.26
   2  14   3   11.68    1.21
  -2  14  -3   10.71    1.17
  -4 -14  -3   -0.36    0.47
   4 -14   3    0.44    0.63
  -4  14  -3   -0.41    0.53
  -4  14  -3    0.37    0.55
   4  14   3    0.13    0.49
   6 -14   3    7.35    1.02
  -6 -14  -3    6.62    0.88
   6  14   3    5.93    0.85
  -6  14  -3    4.78    0.93
  -8 -14  -3    0.74    0.56
   8 -14   3    0.30    0.67
  -8  14  -3    0.15    0.72
 -10 -14  -3    1.19    0.61
 -10  14  -3    0.52    0.73
 -12 -14  -3    0.10    0.57
 -12  14  -3    0.18    0.78
 -14 -14  -3    0.39    0.60
 -14  14  -3    0.38    0.83
 -15 -15   3    0.79    0.61
 -15  15   3   -0.62    0.72
  13 -15  -3    0.87    0.75
 -13 -15   3    0.56    0.59
 -13  15   3    1.75    0.85
  11 -15  -3    1.63    0.75
  11 -15  -3    1.59    0.66
 -11 -15   3    1.13    0.65
 -11  15   3    1.25    0.76
   9 -15  -3    2.15    0.79
   9 -15  -3    2.50    0.70
  -9 -15   3    2.38    0.73
   9 -15  -3    2.41    0.83
  -9  15   3    2.14    0.77
  -7 -15   3    1.12    0.63
   7 -15  -3    1.54    0.72
   7 -15  -3    1.10    0.57
   7  15  -3    1.03    0.54
  -7  15   3   -0.08    0.61
  -5 -15   3    2.35    0.73
   5 -15  -3    2.53    0.78
  -5 -15   3    1.66    0.65
   5 -15  -3    1.97    0.71
  -5  15   3    2.43    0.77
   5  15  -3    3.14    0.73
  -5  15   3    2.87    0.80
   3 -15  -3    3.68    0.80
   3 -15  -3    3.16    0.80
  -3 -15   3    2.44    0.74
  -3 -15   3    4.52    0.86
   3  15  -3    4.70    0.85
  -3  15   3    1.91    0.68
  -3  15   3    4.46    0.94
  -1 -15   3    2.92    0.73
   1 -15  -3    3.28    0.77
  -1 -15   3    2.92    0.77
   1 -15  -3    3.23    0.80
  -1  15   3    2.85    0.75
  -1  15   3    3.94    0.87
   1  15  -3    3.24    0.79
   1  15  -3    3.25    0.78
  -1 -15  -3    0.99    0.59
   1 -15   3    2.00    0.73
  -1 -15  -3    1.10    0.60
   1 -15   3    3.14    0.80
   1  15   3    2.12    0.73
  -1  15  -3    2.66    0.76
  -1  15  -3    2.00    0.75
   3 -15   3    5.43    0.99
  -3 -15  -3    8.43    1.04
  -3  15  -3    5.84    1.02
   3  15   3    7.37    1.02
  -3  15  -3    5.23    1.00
  -5 -15  -3   -0.18    0.53
   5 -15   3    0.53    0.68
   5  15   3    0.36    0.54
  -5  15  -3    0.04    0.62
  -7 -15  -3    2.71    0.71
   7 -15   3    1.38    0.77
  -7  15  -3    1.68    0.81
  -9 -15  -3    0.88    0.65
  -9  15  -3    0.82    0.81
 -11 -15  -3    0.13    0.58
 -11  15  -3    2.03    0.92
 -14 -16   3    0.27    0.61
 -14  16   3    0.25    0.80
 -12 -16   3    0.28    0.63
 -12  16   3   -0.03    0.81
  10 -16  -3    2.06    0.85
 -10 -16   3    0.58    0.69
  10 -16  -3    0.84    0.66
 -10  16   3    2.42    0.89
   8 -16  -3    0.00    0.66
  -8 -16   3   -0.10    0.59
   8 -16  -3    0.61    0.60
  -8  16   3    0.19    0.63
   6 -16  -3    1.37    0.72
  -6 -16   3    1.22    0.68
  -6  16   3    1.64    0.75
   6  16  -3    2.30    0.71
   4 -16  -3    0.01    0.60
  -4 -16   3   -0.08    0.59
  -4  16   3    0.31    0.59
  -4  16   3    0.26    0.63
   4  16  -3    0.01    0.51
  -2 -16   3    4.02    0.88
   2 -16  -3    2.81    0.82
  -2  16   3    2.20    0.77
   2  16  -3    2.45    0.80
  -2  16   3    4.72    0.96
   0 -16   3   -0.98    0.55
   0 -16  -3    1.02    0.66
   0  16  -3    0.79    0.62
   0  16  -3    0.30    0.61
   0  16   3   -0.38    0.53
  -2 -16  -3    2.07    0.73
   2 -16   3    2.38    0.82
   2  16   3    2.14    0.71
  -2  16  -3    2.68    0.88
  -2  16  -3    2.24    0.78
  -4 -16  -3    0.35    0.60
   4 -16   3   -0.47    0.65
  -4  16  -3    0.28    0.71
   6 -16   3   -0.21    0.67
  -6 -16  -3    0.49    0.63
  -6  16  -3   -0.20    0.75
  -8 -16  -3   -0.98    0.62
  -8  16  -3    0.86    0.81
 -10 -16  -3    0.34    0.63
 -10  16  -3    1.38    0.84
 -13 -17   3   -1.04    0.63
 -13  17   3    1.71    0.95
 -11 -17   3   -0.29    0.66
 -11  17   3    1.38    0.89
   9 -17  -3    0.17    0.77
  -9 -17   3    1.13    0.71
  -9  17   3    0.88    0.76
   7 -17  -3    0.63    0.72
  -7 -17   3    0.23    0.64
  -7  17   3    1.94    0.83
   5 -17  -3    0.23    0.70
  -5 -17   3    0.75    0.70
  -5  17   3    0.10    0.65
  -3 -17   3   -0.45    0.57
   3 -17  -3    0.81    0.73
   3  17  -3    1.25    0.69
  -3  17   3    0.76    0.73
   1 -17  -3    0.45    0.69
  -1 -17   3    0.94    0.71
   1  17  -3    2.32    0.87
  -1  17   3    0.92    0.72
   1 -17   3    0.45    0.70
  -1 -17  -3   -0.59    0.62
  -1  17  -3    0.01    0.65
   1  17   3    0.32    0.64
  -3 -17  -3    2.34    0.81
   3 -17   3    1.95    0.85
  -3  17  -3    1.43    0.82
  -5 -17  -3   -0.07    0.65
   5 -17   3   -0.84    0.64
  -5  17  -3   -0.37    0.72
  -7 -17  -3   -0.84    0.60
  -7  17  -3    1.11    0.90
  -9 -17  -3   -1.15    0.62
  -9  17  -3   -0.26    0.79
 -10 -18   3   -0.49    0.67
 -10  18   3   -0.26    0.85
   8 -18  -3    1.15    0.84
  -8 -18   3   -0.77    0.60
  -8  18   3    1.90    0.86
  -6 -18   3   -0.04    0.67
   6 -18  -3   -0.58    0.58
  -6  18   3    1.02    0.81
   4 -18  -3    0.71    0.77
  -4 -18   3   -0.06    0.70
  -2 -18   3    0.17    0.70
   2 -18  -3    0.69    0.75
  -2  18   3    0.35    0.77
   0 -18  -3   -0.10    0.70
   0 -18   3    1.77    0.84
   0  18  -3    1.08    0.75
   2 -18   3   -1.23    0.70
  -2 -18  -3    0.08    0.68
  -4 -18  -3   -0.48    0.63
   4 -18   3   -0.03    0.79
  -4  18  -3    1.41    0.88
   6 -18   3   -0.38    0.76
  -6 -18  -3   -0.51    0.67
  -6  18  -3    1.01    0.89
   7 -19  -3   -0.20    0.80
  -7 -19   3   -0.81    0.68
  -5 -19   3   -0.12    0.70
   5 -19  -3    0.39    0.75
  -3 -19   3   -0.26    0.65
   3 -19  -3   -0.16    0.76
  -1 -19   3    0.34    0.77
   1 -19  -3    0.87    0.81
  -1 -19  -3    0.39    0.75
   1 -19   3    0.64    0.83
   3 -19   3   -0.32    0.73
  -3 -19  -3    1.89    0.86
 -22   0   4   -0.32    0.38
 -20   0   4   -0.06    0.36
 -20   0   4    0.48    0.47
 -18   0   4    0.65    0.34
  16   0  -4    9.45    0.54
 -16   0   4    9.87    0.66
 -16   0   4    8.74    0.55
  14   0  -4   15.07    0.75
 -14   0   4   14.76    0.76
  14   0  -4   13.26    0.69
 -14   0   4   15.41    0.76
 -14   0   4   15.24    0.74
 -12   0   4   37.93    1.42
 -12   0   4   39.03    1.47
 -12   0   4   39.88    1.43
  12   0  -4   37.86    1.46
  12   0  -4   37.64    1.35
 -12   0   4   38.40    1.44
  12   0  -4   38.89    1.45
 -10   0   4  155.68    4.99
 -10   0   4  160.96    4.91
  10   0  -4  152.66    5.11
  10   0  -4  155.24    5.10
 -10   0   4  156.09    5.11
 -10   0   4  158.35    4.91
 -10   0   4  157.57    5.09
  10   0  -4  158.69    4.81
  -8   0   4    0.06    0.17
  -8   0   4    0.10    0.22
  -8   0   4   -0.07    0.16
   8   0  -4    0.13    0.17
  -8   0   4    0.01    0.15
   8   0  -4   -0.02    0.06
   8   0  -4   -0.18    0.16
  -8   0   4   -0.12    0.18
  -6   0   4    6.19    0.42
   6   0  -4    6.90    0.43
  -6   0   4    5.92    0.43
  -6   0   4    6.22    0.51
  -6   0   4    6.44    0.43
   6   0  -4    4.34    0.40
   6   0  -4    6.81    0.45
  -6   0   4    5.61    0.41
  -4   0   4   84.35    2.81
  -4   0   4   77.98    2.79
  -4   0   4   82.62    2.68
   4   0  -4   82.40    2.68
  -4   0   4   82.41    2.67
   4   0  -4   84.50    2.82
  -4   0   4   83.58    2.70
   4   0  -4   79.37    2.80
  -2   0   4  161.83    4.98
   2   0  -4  158.46    5.21
  -2   0   4  162.80    5.22
  -2   0   4  160.05    5.23
   2   0  -4  159.51    5.23
   2   0  -4  162.16    5.01
  -2   0   4  157.10    4.99
   0   0   4    1.26    0.25
   0   0  -4    0.93    0.22
   0   0   4    0.46    0.19
   0   0  -4    0.72    0.21
   0   0   4    0.41    0.21
   0   0   4    0.65    0.21
  -2   0  -4   70.27    2.33
   2   0   4   65.70    2.31
   2   0   4   69.84    2.63
   2   0   4   68.50    2.44
  -2   0  -4   66.49    2.33
  -2   0  -4   70.60    2.44
   2   0   4   68.21    2.44
   2   0   4   70.41    2.31
  -4   0  -4   23.33    1.02
   4   0   4   21.69    1.02
   4   0   4   23.48    1.05
  -4   0  -4   24.59    1.02
   4   0   4   22.19    1.27
  -4   0  -4   23.51    0.99
   4   0   4   22.73    0.95
   6   0   4   57.45    2.45
  -6   0  -4   58.87    2.16
  -6   0  -4   59.41    2.11
   6   0   4   58.21    2.18
  -6   0  -4   60.11    2.07
   6   0   4   59.15    2.18
   8   0   4    0.16    0.24
   8   0   4    0.54    0.26
  -8   0  -4    0.16    0.23
  -8   0  -4    0.11    0.26
   8   0   4   -0.05    0.18
  -8   0  -4    0.19    0.22
  10   0   4    9.45    0.67
 -10   0  -4    9.06    0.73
  10   0   4   10.85    0.71
 -10   0  -4   11.30    0.72
 -10   0  -4    9.84    0.68
  12   0   4    0.46    0.30
 -12   0  -4    0.19    0.29
  12   0   4    0.56    0.31
 -12   0  -4    0.02    0.34
  14   0   4    3.89    0.53
 -14   0  -4    2.99    0.54
  14   0   4    2.85    0.46
 -16   0  -4    3.86    0.62
  16   0   4    3.98    0.49
 -18   0  -4   -0.12    0.48
 -20   0  -4    0.97    0.57
 -23   1   4    0.36    0.46
 -21  -1   4   -0.42    0.32
 -21   1   4    0.36    0.42
 -19  -1   4    0.62    0.32
 -19  -1   4    0.68    0.43
 -19   1   4    0.01    0.38
  17  -1  -4    0.27    0.25
  17  -1  -4    0.16    0.23
 -17  -1   4    0.22    0.28
 -17  -1   4    0.32    0.39
 -17   1   4    0.29    0.26
 -17   1   4    0.22    0.34
 -15  -1   4   15.97    0.68
  15  -1  -4   14.65    0.79
  15  -1  -4   14.14    0.75
 -15  -1   4   12.96    0.72
 -15  -1   4   14.70    0.73
 -15  -1   4   16.99    0.94
 -15   1   4   15.47    0.81
 -15   1   4   17.57    0.89
  15   1  -4   13.50    0.64
 -15   1   4   14.77    0.78
 -13  -1   4    4.76    0.55
  13  -1  -4    4.19    0.42
  13  -1  -4    5.12    0.48
 -13  -1   4    5.44    0.44
 -13  -1   4    4.79    0.40
 -13  -1   4    4.15    0.37
 -13   1   4    4.42    0.45
 -13   1   4    4.76    0.48
 -13   1   4    4.77    0.46
  13   1  -4    4.09    0.37
  11  -1  -4   94.10    3.26
 -11  -1   4   97.58    3.20
 -11  -1   4   96.43    3.08
 -11  -1   4   94.44    3.19
  11  -1  -4   99.01    3.03
 -11  -1   4   94.22    3.18
  11  -1  -4   93.33    3.25
 -11  -1   4   97.25    3.09
 -11   1   4   96.57    3.15
  11   1  -4   94.07    3.21
  11   1  -4   91.01    3.18
 -11   1   4   98.09    3.25
 -11   1   4   97.46    3.28
 -11   1   4   95.72    3.14
  -9  -1   4   51.25    1.81
  -9  -1   4   49.41    1.82
  -9  -1   4   52.80    1.74
   9  -1  -4   49.93    1.86
  -9  -1   4   48.71    1.72
   9  -1  -4   51.07    1.87
  -9  -1   4   50.01    1.80
  -9   1   4   52.43    1.86
  -9   1   4   53.64    1.80
   9   1  -4   48.67    1.80
  -9   1   4   49.45    1.78
   9   1  -4   49.96    1.81
  -9   1   4   49.64    1.86
   9   1  -4   51.51    1.66
  -7  -1   4   30.87    1.13
   7  -1  -4   29.99    1.15
   7  -1  -4   30.77    1.23
  -7  -1   4   30.59    1.19
  -7  -1   4   30.79    1.18
   7  -1  -4   30.44    1.22
  -7  -1   4   29.25    1.13
  -7  -1   4   30.95    1.19
  -7   1   4   31.09    1.18
  -7   1   4   29.11    1.20
  -7   1   4   31.18    1.24
   7   1  -4   29.89    1.18
  -7   1   4   28.88    1.16
  -7   1   4   30.91    1.24
  -5  -1   4   20.68    0.89
  -5  -1   4   20.09    0.84
  -5  -1   4   20.40    0.85
  -5  -1   4   21.01    0.90
  -5  -1   4   19.99    0.88
   5  -1  -4   20.43    0.91
   5  -1  -4   19.80    0.86
   5  -1  -4   19.75    0.90
  -5   1   4   19.82    0.87
   5   1  -4   21.88    0.85
   5   1  -4   21.28    0.90
  -5   1   4   19.55    0.89
  -5   1   4   21.20    0.87
  -5   1   4   20.77    0.92
  -5   1   4   21.09    0.92
  -3  -1   4  153.14    4.78
  -3  -1   4  151.13    4.98
   3  -1  -4  148.87    4.99
  -3  -1   4  148.19    4.77
   3  -1  -4  148.41    4.99
  -3  -1   4  161.73    5.01
   3  -1  -4  154.81    4.80
  -3   1   4  151.11    4.77
   3   1  -4  155.06    4.79
  -3   1   4  152.09    4.99
  -3   1   4  154.00    5.02
   3   1  -4  151.73    4.99
  -3   1   4  158.07    4.79
  -1  -1   4   76.51    2.57
  -1  -1   4   77.94    2.68
  -1  -1   4   76.23    2.56
   1  -1  -4   79.33    2.69
   1  -1  -4   79.62    2.57
   1  -1  -4   78.27    2.68
   1   1  -4   76.10    2.68
   1   1  -4   75.89    2.57
  -1   1   4   81.19    2.69
  -1   1   4   76.04    2.55
  -1   1   4   75.90    2.54
  -1   1   4   76.80    2.69
  -1  -1  -4   49.75    1.81
  -1  -1  -4   51.03    1.71
  -1  -1  -4   51.41    1.80
  -1  -1  -4   46.78    1.72
   1  -1   4   49.63    1.82
   1  -1   4   48.77    1.71
   1  -1   4   46.73    1.73
   1   1   4   49.63    1.82
  -1   1  -4   50.44    1.82
   1   1   4   45.80    1.96
   1   1   4   48.80    1.70
   1   1   4   48.61    1.70
   1   1   4   47.60    1.79
  -1   1  -4   45.53    1.72
  -3  -1  -4    1.85    0.31
   3  -1   4    1.71    0.30
  -3  -1  -4    1.87    0.30
   3  -1   4    2.07    0.30
  -3  -1  -4    1.77    0.28
   3  -1   4    2.25    0.41
  -3   1  -4    2.09    0.33
   3   1   4    1.59    0.29
  -3   1  -4    1.72    0.29
   3   1   4    1.59    0.37
   3   1   4    2.42    0.36
   3   1   4    2.10    0.29
   5  -1   4   48.36    2.05
  -5  -1  -4   48.05    1.76
  -5  -1  -4   49.93    1.75
   5  -1   4   48.50    1.87
  -5  -1  -4   48.76    1.81
   5  -1   4   47.26    1.73
   5   1   4   48.77    1.83
   5   1   4   47.24    1.82
  -5   1  -4   48.43    1.85
  -5   1  -4   50.96    1.79
   5   1   4   46.28    2.09
  -5   1  -4   46.60    1.78
   5   1   4   49.14    1.69
  -7  -1  -4    0.25    0.26
   7  -1   4   -0.16    0.22
  -7  -1  -4    0.29    0.23
  -7  -1  -4   -0.23    0.17
   7  -1   4    0.07    0.16
   7   1   4    0.09    0.22
   7   1   4    0.56    0.26
  -7   1  -4   -0.27    0.19
   7   1   4    0.31    0.19
  -7   1  -4   -0.01    0.21
  -7   1  -4    0.31    0.27
  -9  -1  -4    3.22    0.41
  -9  -1  -4    3.76    0.47
  -9  -1  -4    3.60    0.43
   9  -1   4    3.11    0.46
   9  -1   4    4.03    0.40
  -9   1  -4    3.43    0.45
  -9   1  -4    3.38    0.44
   9   1   4    2.78    0.41
  -9   1  -4    3.52    0.50
   9   1   4    3.28    0.43
  11  -1   4    0.17    0.29
 -11  -1  -4    0.48    0.34
  11  -1   4    0.20    0.31
 -11  -1  -4    0.31    0.28
  11   1   4    0.16    0.27
 -11   1  -4    0.78    0.37
  11   1   4    0.51    0.28
 -11   1  -4    0.21    0.27
 -13  -1  -4    1.49    0.43
  13  -1   4    0.94    0.38
  13  -1   4    1.69    0.44
  13   1   4    1.72    0.37
  13   1   4    1.37    0.37
 -13   1  -4    1.31    0.48
  15  -1   4    0.21    0.34
 -15  -1  -4    0.67    0.43
 -15   1  -4    0.27    0.43
  15   1   4   -0.10    0.30
  15   1   4    0.54    0.30
 -17  -1  -4    0.64    0.46
 -17   1  -4   -0.50    0.43
  17   1   4   -0.18    0.25
 -19  -1  -4    0.29    0.49
 -19   1  -4   -0.34    0.50
 -24   2   4   -0.25    0.49
 -22  -2   4   -0.14    0.29
 -22   2   4    0.04    0.48
 -20  -2   4    0.24    0.29
  20  -2  -4    0.20    0.26
 -20   2   4    0.40    0.41
 -18  -2   4    0.77    0.39
  18  -2  -4   -0.07    0.29
 -18  -2   4   -0.12    0.26
  18  -2  -4   -0.15    0.25
 -18   2   4    0.58    0.39
 -16  -2   4    0.40    0.34
 -16  -2   4    0.00    0.24
 -16  -2   4    0.49    0.22
  16  -2  -4    0.32    0.29
  16  -2  -4   -0.13    0.24
 -16   2   4    0.36    0.30
 -16   2   4    0.55    0.36
 -14  -2   4    0.22    0.20
 -14  -2   4    0.37    0.17
  14  -2  -4    0.77    0.28
 -14  -2   4    0.59    0.32
  14  -2  -4    0.02    0.25
 -14  -2   4    0.71    0.24
 -14   2   4    0.34    0.31
 -14   2   4    0.22    0.28
 -14   2   4    0.72    0.30
  14   2  -4    0.61    0.18
 -12  -2   4   -0.05    0.17
  12  -2  -4    0.16    0.22
  12  -2  -4    0.23    0.19
  12  -2  -4    0.08    0.23
 -12  -2   4    0.26    0.26
 -12  -2   4   -0.06    0.18
 -12  -2   4    0.27    0.18
 -12  -2   4    0.03    0.17
 -12   2   4    0.15    0.24
  12   2  -4    0.15    0.17
 -12   2   4    0.11    0.23
  10  -2  -4    0.40    0.22
 -10  -2   4   -0.12    0.15
 -10  -2   4    0.42    0.19
  10  -2  -4   -0.05    0.06
 -10  -2   4    0.55    0.25
  10  -2  -4    0.27    0.23
 -10  -2   4    0.33    0.20
 -10  -2   4    0.17    0.17
 -10   2   4   -0.17    0.23
 -10   2   4    0.07    0.20
  10   2  -4    0.23    0.19
 -10   2   4    0.33    0.22
  10   2  -4    0.08    0.17
 -10   2   4    0.28    0.20
  -8  -2   4    8.67    0.51
   8  -2  -4    8.37    0.55
  -8  -2   4    8.91    0.50
  -8  -2   4    9.00    0.52
   8  -2  -4    8.33    0.55
  -8  -2   4    9.69    0.52
   8  -2  -4    9.57    0.58
  -8  -2   4    8.52    0.56
  -8   2   4    9.53    0.60
  -8   2   4    9.11    0.58
  -8   2   4    9.21    0.59
  -8   2   4    9.11    0.57
   8   2  -4    7.84    0.50
   8   2  -4    8.40    0.52
   8   2  -4    8.74    0.45
  -6  -2   4   21.67    0.92
  -6  -2   4   21.43    0.93
  -6  -2   4   22.19    0.90
   6  -2  -4   22.68    0.98
  -6  -2   4   21.73    0.90
   6  -2  -4   21.65    0.97
  -6  -2   4   21.29    0.93
   6  -2  -4   20.36    0.92
  -6   2   4   20.69    0.93
  -6   2   4   22.60    0.95
   6   2  -4   21.81    0.93
  -6   2   4   21.34    0.97
   6   2  -4   22.27    0.87
  -6   2   4   22.38    0.98
  -4  -2   4    1.34    0.23
   4  -2  -4    1.51    0.29
   4  -2  -4    0.88    0.24
  -4  -2   4    1.09    0.23
  -4  -2   4    0.82    0.22
   4  -2  -4    1.84    0.29
  -4  -2   4    1.21    0.25
   4   2  -4    1.63    0.26
  -4   2   4    1.15    0.26
  -4   2   4    0.86    0.25
   4   2  -4    0.95    0.22
  -4   2   4    1.41    0.27
  -4   2   4    1.28    0.25
  -2  -2   4   59.72    1.95
  -2  -2   4   56.88    1.96
  -2  -2   4   56.64    2.04
   2  -2  -4   53.64    2.03
   2  -2  -4   58.71    2.05
   2  -2  -4   56.87    1.96
   2   2  -4   54.13    2.03
  -2   2   4   58.22    1.95
  -2   2   4   57.08    2.05
  -2   2   4   58.05    2.06
  -2   2   4   52.37    1.94
   2   2  -4   54.99    1.95
   0  -2  -4    6.23    0.47
   0  -2  -4    6.16    0.49
   0  -2   4    6.15    0.50
   0  -2   4    6.16    0.48
   0  -2   4    5.23    0.47
   0  -2  -4    5.50    0.46
   0   2   4    6.00    0.50
   0   2  -4    5.15    0.46
   0   2   4    6.21    0.47
   0   2  -4    6.98    0.49
   0   2   4    5.26    0.44
   0   2   4    5.85    0.50
  -2  -2  -4  136.51    4.22
   2  -2   4  132.21    4.46
   2  -2   4  130.12    4.24
  -2  -2  -4  136.54    4.24
  -2  -2  -4  132.97    4.41
  -2  -2  -4  131.42    4.42
   2  -2   4  132.90    4.65
  -2   2  -4  129.90    4.28
   2   2   4  133.61    4.16
   2   2   4  134.30    4.44
  -2   2  -4  132.17    4.45
   2   2   4  133.50    4.21
   4  -2   4    0.71    0.24
  -4  -2  -4    0.41    0.21
  -4  -2  -4    0.47    0.24
   4  -2   4   -0.32    0.31
   4  -2   4    0.03    0.21
  -4  -2  -4    0.46    0.22
  -4   2  -4    0.14    0.24
   4   2   4    0.43    0.22
   4   2   4    0.29    0.20
   4   2   4    0.81    0.25
   4   2   4   -0.54    0.27
   4   2   4    0.12    0.21
  -4   2  -4    0.26    0.22
  -6  -2  -4   61.24    2.01
  -6  -2  -4   57.89    2.09
   6  -2   4   54.97    2.33
   6  -2   4   56.10    2.00
  -6  -2  -4   56.47    2.01
   6  -2   4   56.06    2.16
  -6   2  -4   55.86    2.15
   6   2   4   53.82    2.08
   6   2   4   57.02    1.93
  -6   2  -4   54.88    2.09
   6   2   4   60.00    2.45
   6   2   4   56.44    2.09
   8  -2   4    0.03    0.26
  -8  -2  -4   -0.22    0.20
  -8  -2  -4    0.05    0.24
   8  -2   4   -0.21    0.20
  -8  -2  -4    0.02    0.22
  -8   2  -4    0.25    0.31
  -8   2  -4    0.29    0.25
  -8   2  -4    0.11    0.26
   8   2   4    0.18    0.24
   8   2   4    0.01    0.22
  10  -2   4   11.69    0.82
 -10  -2  -4   12.30    0.77
 -10  -2  -4   11.08    0.71
 -10  -2  -4   12.01    0.71
 -10   2  -4   11.89    0.79
  10   2   4   11.20    0.70
  10   2   4   12.14    0.72
 -10   2  -4   10.94    0.87
  12  -2   4   -0.40    0.29
 -12  -2  -4   -0.31    0.24
 -12  -2  -4   -0.27    0.31
 -12   2  -4   -0.25    0.35
  12   2   4    0.17    0.28
  12   2   4   -0.04    0.25
 -14  -2  -4    3.90    0.55
  14  -2   4    3.36    0.53
 -14   2  -4    3.24    0.59
  14   2   4    3.86    0.45
  14   2   4    3.21    0.42
 -16  -2  -4    0.53    0.42
  16   2   4    0.34    0.23
  16   2   4    0.29    0.25
 -16   2  -4    0.66    0.51
 -18  -2  -4    1.65    0.53
 -18   2  -4    1.41    0.58
 -23   3   4   -0.39    0.48
 -21   3   4   -0.52    0.46
 -19  -3   4    0.60    0.26
 -19   3   4    1.29    0.49
  17  -3  -4    0.78    0.34
 -17  -3   4    0.57    0.24
  17  -3  -4    0.79    0.36
 -17  -3   4    0.23    0.32
 -17   3   4    1.33    0.44
 -15  -3   4    0.72    0.23
 -15  -3   4    0.63    0.25
  15  -3  -4    0.74    0.33
  15  -3  -4    0.32    0.32
 -15  -3   4    0.88    0.34
 -15   3   4    0.84    0.40
 -15   3   4    0.71    0.32
 -13  -3   4    2.93    0.31
 -13  -3   4    3.07    0.27
  13  -3  -4    2.08    0.37
 -13  -3   4    2.87    0.41
 -13  -3   4    2.77    0.31
  13  -3  -4    2.52    0.44
  13  -3  -4    2.48    0.34
 -13   3   4    2.53    0.44
 -13   3   4    3.04    0.44
 -13   3   4    2.85    0.43
  13   3  -4    2.48    0.25
 -11  -3   4    0.30    0.18
 -11  -3   4    0.56    0.25
 -11  -3   4    0.44    0.20
 -11  -3   4    0.48    0.18
 -11  -3   4    0.33    0.20
  11  -3  -4    0.90    0.29
  11  -3  -4    0.03    0.12
  11  -3  -4    1.02    0.30
  11   3  -4    0.13    0.17
 -11   3   4    0.42    0.26
 -11   3   4    0.60    0.30
  11   3  -4    0.78    0.25
 -11   3   4    0.48    0.26
 -11   3   4    0.47    0.27
   9  -3  -4    5.00    0.47
  -9  -3   4    3.97    0.36
  -9  -3   4    4.80    0.45
  -9  -3   4    4.21    0.38
  -9  -3   4    4.49    0.38
   9  -3  -4    4.40    0.47
  -9  -3   4    3.21    0.34
   9  -3  -4    4.97    0.50
   9   3  -4    4.58    0.29
  -9   3   4    4.33    0.47
   9   3  -4    3.94    0.36
   9   3  -4    3.65    0.41
  -9   3   4    4.49    0.47
  -9   3   4    4.13    0.47
  -9   3   4    4.81    0.48
  -7  -3   4   45.90    1.64
  -7  -3   4   46.71    1.71
  -7  -3   4   45.31    1.67
  -7  -3   4   48.98    1.65
   7  -3  -4   43.89    1.78
   7  -3  -4   44.88    1.71
   7  -3  -4   47.32    1.82
  -7  -3   4   47.87    1.71
  -7   3   4   47.18    1.80
   7   3  -4   45.34    1.78
  -7   3   4   48.86    1.82
  -7   3   4   49.32    1.74
   7   3  -4   46.63    1.71
  -5  -3   4   52.22    1.87
   5  -3  -4   47.94    1.92
  -5  -3   4   53.00    1.83
   5  -3  -4   52.01    1.94
  -5  -3   4   53.62    1.81
   5  -3  -4   50.81    1.85
  -5  -3   4   50.75    1.79
  -5   3   4   50.99    1.95
   5   3  -4   51.92    1.78
  -5   3   4   50.96    1.93
   5   3  -4   51.66    1.88
  -5   3   4   51.39    1.85
   3  -3  -4    0.10    0.18
   3  -3  -4    0.28    0.19
  -3  -3   4    0.23    0.18
  -3  -3   4    0.09    0.18
   3  -3  -4    0.28    0.19
  -3  -3   4   -0.12    0.18
  -3   3   4    0.17    0.19
  -3   3   4    0.10    0.19
   3   3  -4    0.36    0.20
  -3   3   4    0.16    0.19
   3   3  -4    0.03    0.18
  -3   3   4    0.15    0.19
   1  -3  -4    8.03    0.53
  -1  -3   4    8.88    0.53
   1  -3  -4    7.35    0.53
  -1  -3   4    8.74    0.57
  -1  -3   4    8.14    0.56
   1  -3  -4    7.98    0.54
  -1   3   4    8.27    0.50
   1   3  -4    8.24    0.56
   1   3  -4    7.56    0.54
  -1   3   4    8.04    0.55
  -1   3   4    8.56    0.55
  -1   3   4    8.31    0.52
   1  -3   4   89.26    2.97
   1  -3   4   91.56    3.13
  -1  -3  -4   91.58    3.09
  -1  -3  -4   84.28    2.94
  -1  -3  -4   87.14    3.06
   1   3   4   90.48    2.94
   1   3   4   90.55    3.29
  -1   3  -4   88.73    3.12
   1   3   4   88.37    2.88
   1   3   4   89.97    3.07
   1   3   4   89.21    3.10
  -1   3  -4   88.48    3.00
   3  -3   4   53.77    2.19
  -3  -3  -4   53.36    2.01
  -3  -3  -4   53.77    1.93
  -3  -3  -4   56.09    1.96
   3  -3   4   58.92    2.12
  -3  -3  -4   58.06    2.04
   3  -3   4   56.17    1.97
   3   3   4   53.61    2.02
   3   3   4   52.09    1.90
   3   3   4   55.24    2.05
  -3   3  -4   60.71    2.13
   3   3   4   52.56    2.29
   3   3   4   55.58    1.88
  -3   3  -4   51.34    2.01
   5  -3   4    0.13    0.22
  -5  -3  -4   -0.05    0.18
  -5  -3  -4    0.16    0.21
  -5  -3  -4    0.10    0.20
  -5  -3  -4    0.41    0.24
   5  -3   4   -0.04    0.25
   5  -3   4    0.15    0.22
   5   3   4    0.23    0.20
   5   3   4    0.31    0.23
  -5   3  -4    0.21    0.24
   5   3   4    0.06    0.07
   5   3   4    0.36    0.31
  -5   3  -4    0.41    0.28
   5   3   4    0.17    0.21
  -7  -3  -4    1.11    0.30
   7  -3   4    1.39    0.32
   7  -3   4    0.63    0.30
  -7  -3  -4    0.85    0.26
  -7  -3  -4    0.87    0.26
  -7   3  -4    0.62    0.32
   7   3   4    0.87    0.29
   7   3   4    1.06    0.23
  -7   3  -4    0.45    0.30
   7   3   4    1.70    0.31
   9  -3   4    2.06    0.36
  -9  -3  -4    1.68    0.33
   9  -3   4    2.08    0.42
  -9  -3  -4    1.97    0.34
  -9  -3  -4    1.87    0.38
  -9   3  -4    1.38    0.37
  -9   3  -4    1.89    0.45
   9   3   4    2.06    0.36
   9   3   4    1.79    0.34
 -11  -3  -4    0.02    0.24
  11  -3   4   -0.06    0.32
 -11  -3  -4    0.41    0.32
 -11   3  -4   -0.75    0.35
  11   3   4    0.01    0.25
  11   3   4    0.25    0.26
 -11   3  -4    0.34    0.31
 -13  -3  -4    0.47    0.37
 -13   3  -4   -0.20    0.39
  13   3   4    0.00    0.26
  13   3   4   -0.19    0.23
 -15  -3  -4    0.26    0.39
 -15   3  -4    0.23    0.48
  15   3   4    0.39    0.25
  15   3   4    0.02    0.21
 -17  -3  -4   -0.32    0.39
 -17   3  -4    0.26    0.53
 -19  -3  -4   -0.20    0.45
 -19   3  -4   -0.66    0.54
 -24   4   4    0.61    0.62
 -22   4   4   -0.31    0.53
 -20   4   4    0.29    0.49
  18  -4  -4    0.38    0.37
 -18  -4   4   -0.11    0.20
 -18   4   4   -0.19    0.44
 -16  -4   4   -0.03    0.21
 -16  -4   4    0.27    0.21
  16  -4  -4   -0.56    0.28
  16  -4  -4   -0.04    0.30
 -16  -4   4   -0.25    0.27
 -16   4   4    0.68    0.41
 -14  -4   4    0.21    0.20
 -14  -4   4    0.50    0.28
 -14  -4   4    0.47    0.22
  14  -4  -4    0.60    0.33
  14  -4  -4    0.22    0.30
 -14   4   4    0.49    0.32
 -14   4   4   -0.14    0.33
  12  -4  -4   -0.24    0.26
 -12  -4   4   -0.16    0.23
 -12  -4   4    0.14    0.16
  12  -4  -4   -0.13    0.24
 -12  -4   4    0.40    0.22
 -12  -4   4   -0.14    0.17
  12  -4  -4    0.00    0.23
  12   4  -4    0.18    0.16
 -12   4   4    0.04    0.26
 -12   4   4    0.16    0.31
 -12   4   4   -0.21    0.25
 -10  -4   4    0.10    0.21
 -10  -4   4    0.15    0.18
 -10  -4   4   -0.10    0.17
  10  -4  -4   -0.05    0.22
 -10  -4   4    0.11    0.23
  10  -4  -4   -0.37    0.19
 -10  -4   4   -0.04    0.16
  10  -4  -4   -0.07    0.25
 -10   4   4    0.03    0.25
 -10   4   4    0.28    0.26
 -10   4   4   -0.36    0.21
  10   4  -4   -0.01    0.17
  10   4  -4   -0.40    0.20
   8  -4  -4    7.44    0.61
  -8  -4   4    7.57    0.51
  -8  -4   4    7.23    0.50
   8  -4  -4    5.99    0.59
   8  -4  -4    8.08    0.59
  -8  -4   4    8.24    0.53
  -8  -4   4    7.92    0.49
  -8   4   4    7.63    0.64
   8   4  -4    7.83    0.43
  -8   4   4    6.49    0.60
   8   4  -4    7.41    0.55
   8   4  -4    6.96    0.48
  -8   4   4    6.14    0.57
   6  -4  -4   15.20    0.84
   6  -4  -4   14.06    0.80
  -6  -4   4   14.79    0.73
  -6  -4   4   14.36    0.71
   6  -4  -4   13.39    0.75
  -6  -4   4   13.55    0.72
  -6  -4   4   16.13    0.74
  -6   4   4   13.33    0.79
   6   4  -4   14.29    0.68
   6   4  -4   13.47    0.73
  -6   4   4   13.98    0.82
   6   4  -4   14.18    0.78
  -4  -4   4    0.52    0.23
  -4  -4   4    0.28    0.21
  -4  -4   4    0.53    0.23
  -4  -4   4    0.82    0.24
   4  -4  -4    0.72    0.25
   4  -4  -4    0.54    0.25
   4  -4  -4   -0.05    0.20
  -4   4   4    0.61    0.25
  -4   4   4    0.40    0.24
   4   4  -4    0.33    0.22
  -4   4   4    0.83    0.27
   4   4  -4    1.09    0.25
   4   4  -4    0.45    0.23
  -2  -4   4    5.30    0.51
  -2  -4   4    5.17    0.48
   2  -4  -4    6.89    0.57
  -2  -4   4    5.49    0.51
   2  -4  -4    6.32    0.54
   2  -4  -4    7.69    0.60
  -2   4   4    5.35    0.52
   2   4  -4    6.39    0.51
  -2   4   4    6.14    0.53
   2   4  -4    5.24    0.51
  -2   4   4    7.14    0.53
   0  -4  -4   39.58    1.63
   0  -4  -4   43.08    1.59
   0  -4   4   43.04    1.60
   0  -4  -4   41.93    1.65
   0  -4   4   42.88    1.69
   0   4   4   43.68    1.67
   0   4  -4   42.69    1.69
   0   4  -4   38.86    1.61
   0   4   4   43.45    1.67
   0   4   4   42.40    1.53
   0   4   4   41.93    1.58
   2  -4   4   30.45    1.36
  -2  -4  -4   27.26    1.18
  -2  -4  -4   28.34    1.24
  -2  -4  -4   30.47    1.27
   2  -4   4   30.85    1.34
   2  -4   4   29.62    1.23
  -2  -4  -4   32.48    1.24
   2   4   4   30.07    1.28
   2   4   4   29.35    1.14
   2   4   4   31.70    1.53
  -2   4  -4   29.79    1.33
  -2   4  -4   28.14    1.28
   4  -4   4   17.28    0.86
  -4  -4  -4   17.88    0.72
  -4  -4  -4   17.69    0.81
  -4  -4  -4   14.57    0.81
   4  -4   4   16.86    0.94
  -4  -4  -4   16.06    0.80
  -4  -4  -4   16.68    0.84
   4  -4   4   16.08    0.91
   4   4   4   15.60    0.71
  -4   4  -4   16.06    0.91
   4   4   4   16.20    0.83
   4   4   4   15.07    0.99
   4   4   4   15.45    0.76
   4   4   4   14.61    0.82
  -4   4  -4   16.72    0.93
  -6  -4  -4    1.41    0.32
   6  -4   4    0.70    0.33
  -6  -4  -4    1.12    0.28
  -6  -4  -4    1.39    0.29
   6  -4   4    0.91    0.31
  -6  -4  -4    1.72    0.25
  -6  -4  -4    0.84    0.27
   6  -4   4    1.03    0.31
   6   4   4    0.59    0.36
  -6   4  -4    1.29    0.35
   6   4   4    1.02    0.29
   6   4   4    0.94    0.29
  -6   4  -4    1.00    0.38
   6   4   4    1.27    0.26
   8  -4   4    1.11    0.39
  -8  -4  -4    1.75    0.35
  -8  -4  -4    1.37    0.31
  -8  -4  -4    1.91    0.26
   8  -4   4    1.27    0.34
  -8  -4  -4    1.39    0.31
  -8   4  -4    1.80    0.43
  -8   4  -4    1.43    0.37
   8   4   4    1.39    0.31
   8   4   4    1.19    0.32
 -10  -4  -4    2.91    0.39
  10  -4   4    2.56    0.52
 -10  -4  -4    2.87    0.44
 -10   4  -4    2.67    0.50
 -10   4  -4    2.66    0.55
  10   4   4    2.34    0.37
  10   4   4    2.49    0.38
 -12  -4  -4    0.16    0.24
 -12  -4  -4    0.12    0.34
  12   4   4   -0.15    0.23
 -12   4  -4   -0.13    0.28
  12   4   4   -0.22    0.23
 -12   4  -4   -0.45    0.40
 -14  -4  -4    0.33    0.38
  14   4   4    0.66    0.26
 -14   4  -4    0.52    0.49
  14   4   4    0.62    0.26
 -16  -4  -4    0.76    0.43
 -16   4  -4    0.11    0.55
 -18  -4  -4   -0.63    0.40
 -18   4  -4    0.35    0.60
 -23   5   4   -0.23    0.59
 -21   5   4    0.19    0.58
  19  -5  -4    0.11    0.37
 -19   5   4   -0.47    0.47
 -17  -5   4    0.48    0.24
  17  -5  -4    0.08    0.37
 -17   5   4    0.34    0.48
 -15  -5   4    1.47    0.29
 -15  -5   4    1.53    0.35
  15  -5  -4    1.61    0.43
  15  -5  -4    1.19    0.44
 -15  -5   4    2.04    0.31
 -15   5   4    1.73    0.49
 -15   5   4    2.22    0.48
 -13  -5   4    0.34    0.26
 -13  -5   4    0.28    0.21
  13  -5  -4   -0.09    0.25
  13  -5  -4    0.32    0.33
 -13  -5   4    0.00    0.15
 -13  -5   4    0.28    0.24
  13  -5  -4    0.01    0.17
  13  -5  -4    0.50    0.31
 -13   5   4   -0.02    0.33
  13   5  -4    0.23    0.17
 -13   5   4   -0.13    0.29
  13   5  -4    0.06    0.16
  11  -5  -4    5.67    0.61
  11  -5  -4    8.16    0.76
 -11  -5   4    6.47    0.46
 -11  -5   4    6.63    0.55
 -11  -5   4    7.16    0.51
 -11  -5   4    8.03    0.52
  11  -5  -4    7.58    0.67
 -11   5   4    8.63    0.74
 -11   5   4    7.59    0.71
  11   5  -4    6.97    0.46
  11   5  -4    6.82    0.49
   9  -5  -4    0.59    0.29
  -9  -5   4    0.71    0.23
  -9  -5   4    0.49    0.25
  -9  -5   4    0.22    0.20
   9  -5  -4    0.14    0.24
   9  -5  -4    0.23    0.29
  -9  -5   4    0.23    0.22
   9   5  -4    0.30    0.21
  -9   5   4    0.22    0.26
   9   5  -4    0.73    0.17
  -9   5   4    0.60    0.29
  -9   5   4    0.43    0.30
   9   5  -4    0.70    0.30
   7  -5  -4    5.69    0.60
   7  -5  -4    5.58    0.55
  -7  -5   4    5.64    0.50
   7  -5  -4    4.87    0.56
  -7  -5   4    5.10    0.46
  -7  -5   4    5.52    0.48
  -7  -5   4    6.40    0.51
  -7   5   4    5.04    0.55
   7   5  -4    7.47    0.64
   7   5  -4    6.15    0.51
  -7   5   4    6.25    0.60
  -7   5   4    6.00    0.59
  -5  -5   4    0.53    0.27
  -5  -5   4    0.33    0.23
   5  -5  -4    0.40    0.28
   5  -5  -4    0.10    0.21
  -5  -5   4    0.47    0.23
  -5  -5   4    0.89    0.26
   5  -5  -4    0.81    0.29
   5   5  -4    0.56    0.24
  -5   5   4    0.53    0.26
  -5   5   4    0.83    0.31
  -5   5   4    0.66    0.28
   5   5  -4    0.96    0.25
   5   5  -4    0.69    0.27
  -3  -5   4    5.14    0.48
  -3  -5   4    4.26    0.47
   3  -5  -4    4.62    0.49
   3  -5  -4    4.30    0.48
   3  -5  -4    4.83    0.51
   3   5  -4    5.48    0.55
   3   5  -4    4.13    0.46
  -3   5   4    3.97    0.47
  -3   5   4    4.88    0.51
  -3   5   4    4.05    0.48
   3   5  -4    5.40    0.50
   1  -5  -4    7.09    0.59
  -1  -5   4    8.13    0.60
   1  -5  -4    7.74    0.58
   1  -5  -4    6.70    0.60
  -1  -5   4    6.86    0.59
   1   5  -4    7.36    0.64
   1   5  -4    8.35    0.66
   1   5  -4    7.11    0.62
  -1   5   4    7.27    0.62
  -1   5   4    7.84    0.62
  -1   5   4    8.66    0.61
  -1  -5  -4   -0.10    0.18
   1  -5   4    0.10    0.23
   1  -5   4   -0.05    0.24
  -1  -5  -4   -0.21    0.21
  -1  -5  -4   -0.12    0.18
  -1   5  -4    0.17    0.23
   1   5   4   -0.27    0.19
   1   5   4   -0.31    0.17
   1   5   4    0.21    0.25
  -1   5  -4   -0.25    0.20
   1   5   4    0.03    0.41
  -1   5  -4   -0.38    0.20
   1   5   4   -0.29    0.20
  -3  -5  -4    0.64    0.25
  -3  -5  -4    0.48    0.27
   3  -5   4    0.59    0.27
  -3  -5  -4    0.46    0.22
   3  -5   4   -0.06    0.25
  -3  -5  -4    0.42    0.24
   3  -5   4    0.05    0.26
  -3   5  -4    0.34    0.26
  -3   5  -4    0.51    0.31
   3   5   4    0.09    0.20
   3   5   4    0.43    0.24
   3   5   4    0.44    0.25
   3   5   4    0.19    0.32
   3   5   4    0.58    0.21
  -5  -5  -4    3.68    0.42
   5  -5   4    3.29    0.47
   5  -5   4    3.78    0.51
  -5  -5  -4    3.80    0.43
  -5  -5  -4    2.81    0.41
  -5  -5  -4    3.78    0.44
   5  -5   4    3.21    0.46
   5   5   4    4.34    0.36
  -5   5  -4    4.53    0.57
  -5   5  -4    3.70    0.52
   5   5   4    3.51    0.45
   5   5   4    3.50    0.43
   5   5   4    4.44    0.62
  -7  -5  -4    0.96    0.32
  -7  -5  -4    0.85    0.28
   7  -5   4    0.87    0.33
  -7  -5  -4    0.86    0.29
   7  -5   4    1.57    0.40
   7   5   4    1.05    0.25
  -7   5  -4    0.93    0.38
   7   5   4    1.17    0.32
   7   5   4    0.83    0.30
  -7   5  -4    0.96    0.36
  -7   5  -4    0.91    0.40
  -9  -5  -4    0.42    0.31
  -9  -5  -4    0.48    0.24
   9  -5   4    0.23    0.33
   9  -5   4    0.33    0.31
  -9   5  -4    0.06    0.40
   9   5   4   -0.03    0.25
   9   5   4    0.17    0.26
  -9   5  -4    0.21    0.32
  -9   5  -4   -0.19    0.25
 -11  -5  -4   -0.22    0.23
 -11  -5  -4    0.99    0.36
  11   5   4    0.15    0.27
 -11   5  -4   -0.10    0.30
  11   5   4    0.00    0.25
 -11   5  -4   -0.66    0.40
 -13  -5  -4   -0.35    0.35
 -13   5  -4    0.25    0.50
  13   5   4    0.63    0.27
  13   5   4    0.23    0.25
 -15  -5  -4    0.54    0.41
 -15   5  -4    0.36    0.54
 -17  -5  -4    1.08    0.44
 -17   5  -4    0.04    0.61
 -19  -5  -4    0.47    0.45
 -19   5  -4   -0.30    0.60
 -22   6   4   -0.47    0.60
 -20   6   4   -0.92    0.49
  18  -6  -4   -0.43    0.38
 -18  -6   4    0.29    0.24
 -18   6   4    0.12    0.52
 -16  -6   4    0.38    0.26
  16  -6  -4    0.15    0.40
 -16   6   4    0.07    0.45
 -14  -6   4    6.16    0.48
 -14  -6   4    6.42    0.52
  14  -6  -4    5.21    0.40
  14  -6  -4    5.32    0.65
 -14  -6   4    5.02    0.46
  14  -6  -4    5.14    0.70
 -14   6   4    4.52    0.65
 -14   6   4    5.77    0.72
  12  -6  -4    2.46    0.50
 -12  -6   4    1.36    0.31
 -12  -6   4    1.30    0.26
 -12  -6   4    1.72    0.31
 -12  -6   4    1.66    0.33
  12  -6  -4    2.55    0.46
  12  -6  -4    2.16    0.46
 -12   6   4    1.61    0.48
  12   6  -4    2.22    0.30
 -12   6   4    1.72    0.45
  12   6  -4    1.96    0.31
  10  -6  -4   11.16    0.83
 -10  -6   4   10.95    0.63
  10  -6  -4   11.96    0.88
 -10  -6   4   11.39    0.66
 -10  -6   4   12.05    0.67
  10  -6  -4   11.40    0.80
 -10   6   4   10.86    0.90
 -10   6   4   13.30    0.91
  10   6  -4   11.32    0.64
  10   6  -4   10.91    0.68
 -10   6   4    9.99    0.86
   8  -6  -4    0.70    0.33
  -8  -6   4    0.73    0.28
  -8  -6   4    0.60    0.25
   8  -6  -4    0.18    0.30
  -8  -6   4    0.19    0.25
  -8  -6   4    0.36    0.23
   8  -6  -4    0.46    0.32
  -8   6   4    0.23    0.31
   8   6  -4    0.81    0.27
   8   6  -4    0.50    0.23
   8   6  -4    0.99    0.33
  -8   6   4    0.65    0.31
   8   6  -4    0.47    0.21
  -8   6   4    0.11    0.27
  -6  -6   4   19.23    0.91
  -6  -6   4   16.73    0.89
  -6  -6   4   19.29    0.95
   6  -6  -4   18.89    0.97
   6  -6  -4   20.76    1.08
   6  -6  -4   19.34    1.05
  -6   6   4   20.00    1.07
  -6   6   4   16.52    1.00
  -6   6   4   18.55    0.99
   6   6  -4   18.15    0.94
   6   6  -4   18.95    1.03
   6   6  -4   18.99    0.88
   4  -6  -4   -0.04    0.26
  -4  -6   4    0.37    0.24
   4  -6  -4    0.16    0.24
   4  -6  -4    0.08    0.25
  -4  -6   4    0.27    0.26
  -4   6   4    0.20    0.27
   4   6  -4   -0.06    0.22
   4   6  -4    0.14    0.22
  -4   6   4    0.54    0.28
   4   6  -4    0.15    0.24
  -4   6   4    0.28    0.25
  -2  -6   4   14.18    0.84
  -2  -6   4   13.14    0.80
   2  -6  -4   14.10    0.84
   2  -6  -4   14.87    0.86
   2  -6  -4   15.62    0.89
  -2   6   4   14.86    0.85
   2   6  -4   13.11    0.84
  -2   6   4   13.81    0.85
  -2   6   4   14.58    0.86
   2   6  -4   13.72    0.85
   2   6  -4   16.06    0.83
   0  -6   4    8.86    0.72
   0  -6   4    6.62    0.61
   0  -6  -4    6.69    0.62
   0  -6  -4    7.14    0.63
   0  -6  -4    6.07    0.59
   0   6  -4    6.77    0.64
   0   6   4    7.73    0.66
   0   6   4    7.24    0.66
   0   6   4    7.95    0.64
   0   6   4    8.28    0.69
   0   6  -4    7.93    0.70
   0   6  -4    5.40    0.60
  -2  -6  -4   69.28    2.55
  -2  -6  -4   75.55    2.68
   2  -6   4   71.75    2.66
   2  -6   4   71.53    2.62
   2  -6   4   74.24    2.77
  -2  -6  -4   76.13    2.69
  -2   6  -4   74.54    2.78
  -2   6  -4   70.41    2.76
  -2   6  -4   70.58    2.68
   2   6   4   73.69    2.86
   2   6   4   71.34    2.69
   2   6   4   74.44    2.43
   2   6   4   74.05    2.55
  -4  -6  -4    5.07    0.54
   4  -6   4    5.01    0.52
  -4  -6  -4    4.31    0.50
   4  -6   4    6.04    0.65
  -4  -6  -4    4.50    0.52
  -4  -6  -4    5.75    0.53
   4  -6   4    3.82    0.51
   4   6   4    5.69    0.50
   4   6   4    4.85    0.54
  -4   6  -4    5.80    0.63
   4   6   4    5.98    0.40
  -4   6  -4    5.18    0.63
  -4   6  -4    4.78    0.60
   4   6   4    4.92    0.54
  -4   6  -4    5.31    0.63
   4   6   4    4.93    0.66
   6  -6   4    2.09    0.44
  -6  -6  -4    3.34    0.45
   6  -6   4    2.04    0.46
  -6  -6  -4    2.55    0.40
  -6  -6  -4    2.87    0.42
  -6   6  -4    2.48    0.46
   6   6   4    2.76    0.36
   6   6   4    2.83    0.42
  -6   6  -4    2.31    0.48
   6   6   4    2.69    0.42
  -6   6  -4    2.97    0.56
   6   6   4    2.59    0.28
  -6   6  -4    2.95    0.53
  -8  -6  -4    0.78    0.35
  -8  -6  -4    1.39    0.33
   8  -6   4    1.07    0.37
   8  -6   4    0.20    0.35
  -8  -6  -4    0.86    0.30
  -8   6  -4    1.24    0.40
   8   6   4    1.10    0.32
  -8   6  -4    1.07    0.46
   8   6   4    0.58    0.30
  -8   6  -4    0.94    0.40
 -10  -6  -4    0.67    0.29
 -10  -6  -4    0.55    0.35
  10   6   4    1.16    0.33
 -10   6  -4    0.94    0.39
 -10   6  -4    1.30    0.53
  10   6   4    0.71    0.29
 -12  -6  -4   -0.25    0.35
 -12   6  -4   -0.31    0.48
  12   6   4    0.57    0.29
  12   6   4    0.22    0.26
 -14  -6  -4    0.49    0.41
 -14   6  -4   -0.31    0.49
  14   6   4   -0.01    0.22
 -16  -6  -4    0.39    0.41
 -16   6  -4    2.02    0.72
 -18  -6  -4    0.15    0.43
 -18   6  -4    0.60    0.67
 -23   7   4    0.12    0.69
 -21   7   4   -0.47    0.58
 -19   7   4    0.67    0.58
 -17  -7   4    0.47    0.28
  17  -7  -4   -0.28    0.41
 -17   7   4   -0.10    0.49
  15  -7  -4    8.44    0.92
 -15  -7   4    8.84    0.60
 -15   7   4    9.20    0.97
  13  -7  -4    0.01    0.34
 -13  -7   4    0.09    0.27
  13  -7  -4    0.52    0.27
 -13  -7   4    0.16    0.21
 -13  -7   4    0.27    0.29
  13  -7  -4    0.01    0.38
  13  -7  -4    0.73    0.38
 -13   7   4    0.22    0.44
  13   7  -4   -0.05    0.22
 -13   7   4    1.01    0.42
  13   7  -4    0.23    0.21
  11  -7  -4   14.87    0.97
  11  -7  -4   16.73    1.05
  11  -7  -4   14.88    1.07
 -11  -7   4   15.07    0.82
 -11  -7   4   14.71    0.77
 -11  -7   4   15.64    0.84
 -11   7   4   15.46    1.04
  11   7  -4   16.82    0.86
 -11   7   4   14.61    1.01
  11   7  -4   16.25    0.81
   9  -7  -4    5.78    0.67
  -9  -7   4    5.38    0.52
   9  -7  -4    6.96    0.71
   9  -7  -4    5.83    0.69
  -9  -7   4    5.56    0.54
  -9   7   4    5.01    0.65
  -9   7   4    6.93    0.75
  -9   7   4    5.35    0.66
   9   7  -4    5.05    0.51
   9   7  -4    6.08    0.44
   9   7  -4    4.31    0.50
   7  -7  -4   38.26    1.71
  -7  -7   4   34.51    1.50
   7  -7  -4   33.45    1.63
  -7  -7   4   35.57    1.46
  -7  -7   4   37.28    1.46
   7  -7  -4   38.91    1.59
   7   7  -4   35.93    1.53
  -7   7   4   35.54    1.66
   7   7  -4   34.84    1.52
   7   7  -4   37.26    1.66
  -7   7   4   34.76    1.59
   7   7  -4   34.12    1.37
  -7   7   4   34.19    1.64
   5  -7  -4   27.28    1.31
  -5  -7   4   23.40    1.19
  -5  -7   4   24.09    1.14
   5  -7  -4   24.52    1.29
   5  -7  -4   25.03    1.22
   5   7  -4   25.04    1.13
   5   7  -4   25.86    1.29
   5   7  -4   24.15    1.20
  -5   7   4   26.86    1.32
  -5   7   4   26.45    1.24
  -5   7   4   24.37    1.28
  -3  -7   4    3.71    0.48
  -3  -7   4    3.31    0.44
   3  -7  -4    3.01    0.48
   3  -7  -4    2.85    0.46
   3  -7  -4    2.36    0.43
   3   7  -4    2.91    0.47
   3   7  -4    2.51    0.43
  -3   7   4    3.43    0.50
   3   7  -4    3.25    0.44
   3   7  -4    3.16    0.47
  -3   7   4    3.53    0.51
  -3   7   4    2.45    0.45
   1  -7  -4    2.53    0.43
   1  -7  -4    3.06    0.47
   1  -7  -4    1.90    0.40
  -1  -7   4    2.29    0.41
  -1  -7   4    2.62    0.46
  -1   7   4    1.45    0.38
   1   7  -4    2.25    0.43
   1   7  -4    2.29    0.44
  -1   7   4    2.07    0.39
   1   7  -4    2.55    0.44
  -1   7   4    2.60    0.42
   1   7  -4    1.99    0.42
  -1   7   4    1.65    0.39
  -1  -7  -4  105.50    3.68
   1  -7   4  100.14    3.74
   1  -7   4  109.10    3.59
  -1  -7  -4   99.22    3.51
   1  -7   4  101.74    3.59
  -1  -7  -4  107.13    3.69
  -1   7  -4  104.27    3.62
  -1   7  -4  105.34    3.78
   1   7   4   97.81    3.79
   1   7   4  107.58    3.51
   1   7   4  102.12    3.71
  -1   7  -4  105.93    3.77
   1   7   4  105.18    3.70
  -1   7  -4   97.80    3.73
  -3  -7  -4   56.18    2.11
   3  -7   4   56.24    2.10
  -3  -7  -4   53.47    2.16
   3  -7   4   56.63    2.17
   3  -7   4   55.00    2.30
  -3  -7  -4   53.56    2.17
  -3   7  -4   55.00    2.29
   3   7   4   56.43    2.06
   3   7   4   54.02    1.92
   3   7   4   52.99    2.19
  -3   7  -4   59.65    2.31
  -3   7  -4   56.97    2.25
  -3   7  -4   57.08    2.32
   3   7   4   58.61    2.20
   3   7   4   54.13    2.32
   5  -7   4    4.43    0.58
  -5  -7  -4    3.79    0.49
   5  -7   4    3.43    0.56
  -5  -7  -4    4.64    0.51
  -5  -7  -4    3.93    0.51
   5   7   4    3.91    0.35
  -5   7  -4    3.77    0.60
   5   7   4    3.20    0.48
  -5   7  -4    3.66    0.53
  -5   7  -4    3.62    0.57
   5   7   4    3.50    0.50
  -5   7  -4    3.47    0.57
   5   7   4    3.81    0.63
   5   7   4    2.08    0.33
   7  -7   4    0.66    0.40
  -7  -7  -4    0.05    0.32
   7  -7   4    0.15    0.35
  -7  -7  -4   -0.33    0.25
  -7   7  -4    0.03    0.40
   7   7   4    0.12    0.29
   7   7   4    0.64    0.30
  -7   7  -4    0.16    0.33
  -7   7  -4    0.36    0.33
  -9  -7  -4    9.33    0.77
  -9  -7  -4   11.64    0.79
   9  -7   4   11.21    0.92
   9   7   4   10.51    0.75
  -9   7  -4   11.00    0.99
  -9   7  -4   10.24    1.00
  -9   7  -4   12.21    0.89
   9   7   4   11.79    0.76
 -11  -7  -4    0.17    0.38
  11   7   4    0.80    0.33
 -11   7  -4    1.10    0.43
  11   7   4    1.05    0.33
 -11   7  -4    1.25    0.56
 -13  -7  -4    0.65    0.42
 -13   7  -4    0.92    0.65
  13   7   4    0.55    0.29
  13   7   4    1.12    0.31
 -15  -7  -4    1.12    0.45
 -15   7  -4    0.98    0.67
 -17  -7  -4   -0.13    0.44
 -17   7  -4    0.16    0.68
 -22   8   4   -0.02    0.66
 -20   8   4    0.70    0.70
  18  -8  -4    0.61    0.51
 -18  -8   4    0.31    0.30
 -18   8   4    0.67    0.62
 -16  -8   4   -0.21    0.30
  16  -8  -4    0.14    0.43
 -16   8   4    0.04    0.50
  14  -8  -4    5.51    0.55
  14  -8  -4    6.16    0.83
 -14  -8   4    5.79    0.55
 -14   8   4    5.65    0.80
  14   8  -4    5.82    0.47
  14   8  -4    5.17    0.43
  12  -8  -4    1.13    0.49
  12  -8  -4    0.92    0.33
  12  -8  -4    0.32    0.35
  12  -8  -4    0.67    0.39
 -12  -8   4    0.18    0.33
 -12   8   4    1.03    0.45
  12   8  -4    1.01    0.32
  12   8  -4    0.52    0.28
 -12   8   4    0.54    0.46
  10  -8  -4   18.01    1.17
  10  -8  -4   15.92    1.06
 -10  -8   4   15.18    0.86
 -10  -8   4   15.00    0.99
 -10  -8   4   14.22    0.84
  10  -8  -4   14.89    1.01
  10   8  -4   14.09    0.88
  10   8  -4   13.57    0.82
 -10   8   4   14.41    1.04
 -10   8   4   14.36    1.01
   8  -8  -4    1.53    0.43
  -8  -8   4    1.13    0.38
   8  -8  -4    1.32    0.42
  -8  -8   4    1.09    0.37
  -8  -8   4    0.85    0.32
   8  -8  -4    1.95    0.50
  -8   8   4    1.71    0.46
  -8   8   4    1.14    0.43
   8   8  -4    1.46    0.37
   8   8  -4    1.08    0.34
  -8   8   4    1.11    0.42
   6  -8  -4   54.67    2.18
   6  -8  -4   54.95    2.29
  -6  -8   4   53.58    2.29
   6  -8  -4   53.17    2.29
  -6  -8   4   51.92    2.06
  -6  -8   4   56.96    2.17
   6   8  -4   51.08    2.13
   6   8  -4   57.39    2.32
  -6   8   4   53.08    2.27
  -6   8   4   52.97    2.29
   6   8  -4   54.08    2.16
   6   8  -4   55.50    2.02
  -6   8   4   53.92    2.18
   4  -8  -4    0.58    0.37
   4  -8  -4    0.08    0.30
  -4  -8   4    0.56    0.33
  -4  -8   4    0.85    0.34
   4  -8  -4    0.52    0.31
   4   8  -4    1.07    0.38
  -4   8   4    0.99    0.37
  -4   8   4    0.64    0.36
   4   8  -4    0.90    0.34
  -4   8   4    0.70    0.36
   4   8  -4    1.01    0.35
   4   8  -4    1.49    0.36
   2  -8  -4   19.12    1.08
  -2  -8   4   18.43    0.99
   2  -8  -4   18.21    1.05
  -2  -8   4   17.49    1.03
   2  -8  -4   18.82    1.05
  -2   8   4   18.52    1.08
   2   8  -4   16.31    1.03
  -2   8   4   15.76    0.97
  -2   8   4   18.45    1.08
   2   8  -4   15.39    1.02
  -2   8   4   17.11    0.97
   2   8  -4   18.05    1.08
   2   8  -4   18.46    1.04
   0  -8  -4   21.45    1.18
   0  -8   4   23.44    1.20
   0  -8  -4   20.94    1.14
   0  -8   4   22.39    1.24
   0  -8  -4   24.89    1.23
   0   8  -4   22.39    1.20
   0   8  -4   22.92    1.24
   0   8   4   22.51    1.21
   0   8   4   23.66    1.16
   0   8  -4   22.03    1.24
   0   8   4   21.80    1.21
   0   8   4   21.70    1.17
   0   8  -4   20.38    1.22
  -2  -8  -4   72.48    2.76
   2  -8   4   70.70    2.72
  -2  -8  -4   76.28    2.67
   2  -8   4   74.81    2.88
  -2  -8  -4   72.85    2.76
   2  -8   4   73.47    2.59
   2   8   4   71.03    2.47
   2   8   4   70.28    2.78
   2   8   4   71.78    2.86
  -2   8  -4   73.24    2.79
   2   8   4   76.31    2.63
  -2   8  -4   75.08    2.88
  -2   8  -4   68.30    2.85
  -2   8  -4   72.60    2.86
   2   8   4   67.77    2.74
   4  -8   4    1.43    0.44
   4  -8   4    1.44    0.44
  -4  -8  -4    0.67    0.32
  -4  -8  -4    0.96    0.38
  -4   8  -4    0.39    0.33
   4   8   4    1.51    0.41
  -4   8  -4    0.71    0.45
   4   8   4    0.91    0.32
  -4   8  -4    1.08    0.42
   4   8   4    0.44    0.38
   4   8   4    1.05    0.27
   4   8   4    1.36    0.38
  -4   8  -4    0.89    0.40
  -6  -8  -4   12.08    0.82
  -6  -8  -4   10.54    0.85
   6  -8   4   12.83    1.00
   6  -8   4   11.25    1.03
   6   8   4   11.30    0.83
   6   8   4   11.02    0.54
  -6   8  -4   11.78    0.98
  -6   8  -4   12.00    1.05
   6   8   4   11.26    0.71
  -6   8  -4   12.38    1.05
   6   8   4   11.92    0.83
   8  -8   4    4.31    0.65
  -8  -8  -4    3.79    0.55
  -8  -8  -4    3.79    0.52
  -8   8  -4    4.07    0.73
  -8   8  -4    3.66    0.64
  -8   8  -4    5.61    0.69
   8   8   4    3.23    0.50
   8   8   4    4.03    0.53
 -10  -8  -4    4.98    0.63
  10   8   4    5.98    0.61
 -10   8  -4    6.83    0.77
  10   8   4    5.83    0.61
 -10   8  -4    4.87    0.81
 -12  -8  -4    1.21    0.47
 -12   8  -4    0.51    0.58
  12   8   4    0.59    0.34
  12   8   4    0.62    0.32
 -14  -8  -4    0.82    0.47
 -14   8  -4    2.67    0.79
  14   8   4    1.85    0.31
  14   8   4    2.03    0.32
 -16  -8  -4   -0.34    0.42
 -16   8  -4    0.02    0.67
 -18  -8  -4   -0.48    0.42
 -18   8  -4   -0.08    0.70
 -21   9   4   -0.54    0.63
 -19  -9   4    0.56    0.34
 -19   9   4   -1.05    0.59
 -17  -9   4   -0.43    0.31
  17  -9  -4   -0.69    0.46
 -17   9   4    0.44    0.62
  15  -9  -4    1.19    0.58
 -15  -9   4    0.85    0.38
  15   9  -4    0.49    0.22
 -15   9   4    0.81    0.56
  15   9  -4    0.81    0.25
  13  -9  -4    0.25    0.32
  13  -9  -4   -0.39    0.40
 -13  -9   4    0.23    0.40
 -13  -9   4    0.33    0.35
  13   9  -4   -0.18    0.28
 -13   9   4   -0.08    0.48
  13   9  -4    0.20    0.27
  11  -9  -4    4.85    0.61
 -11  -9   4    3.99    0.62
  11  -9  -4    5.12    0.76
  11  -9  -4    4.17    0.67
  11  -9  -4    4.29    0.71
 -11  -9   4    4.15    0.55
 -11   9   4    5.58    0.74
  11   9  -4    4.02    0.51
  11   9  -4    4.81    0.58
 -11   9   4    3.99    0.71
   9  -9  -4   -0.31    0.31
  -9  -9   4   -0.08    0.32
  -9  -9   4    0.54    0.37
   9  -9  -4    0.19    0.39
   9  -9  -4   -0.06    0.34
   9   9  -4   -0.01    0.28
   9   9  -4    0.28    0.29
  -9   9   4    0.37    0.39
  -9   9   4   -0.31    0.36
   7  -9  -4   18.28    1.20
   7  -9  -4   16.96    1.14
   7  -9  -4   19.86    1.16
  -7  -9   4   18.47    1.16
  -7  -9   4   18.89    1.07
   7   9  -4   17.85    1.06
   7   9  -4   17.93    0.96
  -7   9   4   15.98    1.15
   7   9  -4   15.35    1.01
  -7   9   4   21.64    1.19
  -7   9   4   21.82    1.26
   5  -9  -4    4.03    0.61
  -5  -9   4    3.56    0.59
   5  -9  -4    3.15    0.58
   5  -9  -4    5.33    0.70
  -5  -9   4    4.60    0.59
   5   9  -4    3.05    0.50
   5   9  -4    4.07    0.62
   5   9  -4    3.38    0.54
   5   9  -4    3.03    0.50
  -5   9   4    3.38    0.59
  -5   9   4    2.47    0.55
  -5   9   4    3.85    0.63
  -3  -9   4   38.58    1.74
   3  -9  -4   35.16    1.75
  -3  -9   4   38.59    1.69
   3  -9  -4   35.88    1.76
   3  -9  -4   37.44    1.70
   3   9  -4   39.23    1.76
   3   9  -4   40.46    1.83
  -3   9   4   38.40    1.63
   3   9  -4   38.68    1.68
  -3   9   4   38.14    1.80
   3   9  -4   35.70    1.72
  -3   9   4   35.65    1.66
  -3   9   4   39.00    1.82
   1  -9  -4    9.35    0.86
   1  -9  -4    7.57    0.76
   1  -9  -4    9.91    0.89
  -1  -9   4   10.77    0.92
  -1  -9   4   10.00    0.89
   1   9  -4   10.30    0.92
   1   9  -4   10.41    0.94
   1   9  -4    9.71    0.88
  -1   9   4    7.27    0.81
  -1   9   4    9.42    0.82
  -1   9   4   10.44    0.93
  -1   9   4    8.20    0.73
   1   9  -4   10.41    0.94
  -1  -9  -4   29.35    1.46
  -1  -9  -4   29.52    1.47
   1  -9   4   30.71    1.56
   1  -9   4   27.45    1.45
   1  -9   4   27.98    1.17
  -1  -9  -4   30.22    1.45
  -1   9  -4   32.14    1.59
   1   9   4   30.91    1.50
  -1   9  -4   30.53    1.57
  -1   9  -4   31.73    1.57
   1   9   4   29.38    1.45
   1   9   4   30.77    1.53
   1   9   4   31.33    1.42
  -1   9  -4   29.09    1.51
  -3  -9  -4   21.34    1.21
   3  -9   4   23.78    1.37
  -3  -9  -4   22.12    1.20
   3  -9   4   20.33    1.26
   3   9   4   23.58    1.30
  -3   9  -4   24.42    1.34
   3   9   4   23.79    1.18
  -3   9  -4   24.16    1.37
   3   9   4   21.87    1.02
  -3   9  -4   24.26    1.37
   3   9   4   22.76    1.25
  -3   9  -4   22.82    1.32
   5  -9   4   14.04    1.07
  -5  -9  -4   13.49    0.95
   5  -9   4   15.28    1.01
  -5  -9  -4   14.08    0.96
  -5   9  -4   12.98    1.14
   5   9   4   13.14    0.67
   5   9   4   13.82    0.84
  -5   9  -4   12.76    1.14
   5   9   4   14.81    0.96
  -5   9  -4   15.97    1.14
   5   9   4   14.36    0.95
  -5   9  -4   15.77    1.06
  -7  -9  -4   13.49    0.95
   7  -9   4   13.50    1.11
  -7  -9  -4   13.78    0.93
  -7   9  -4   12.19    1.13
  -7   9  -4   14.06    1.04
   7   9   4   14.98    0.97
   7   9   4   13.16    0.92
  -7   9  -4   14.98    1.11
  -9  -9  -4    1.46    0.46
   9  -9   4    0.79    0.51
   9   9   4    0.68    0.37
  -9   9  -4    1.79    0.62
   9   9   4    1.24    0.39
 -11  -9  -4    1.91    0.49
 -11   9  -4    2.61    0.73
  11   9   4    1.35    0.40
 -13  -9  -4    0.55    0.46
  13   9   4    0.62    0.34
 -13   9  -4    0.67    0.67
 -15  -9  -4    0.23    0.44
 -15   9  -4    0.17    0.68
 -17  -9  -4    0.34    0.47
 -17   9  -4    0.38    0.72
 -20  10   4    1.18    0.72
 -18 -10   4    0.88    0.40
 -18  10   4    0.30    0.66
  16 -10  -4    0.71    0.56
 -16 -10   4    0.06    0.38
 -16  10   4    0.61    0.62
 -14 -10   4    1.97    0.47
  14 -10  -4    2.19    0.67
 -14 -10   4    2.84    0.62
  14  10  -4    2.04    0.38
  14  10  -4    1.86    0.41
 -14  10   4    2.55    0.70
  12 -10  -4    0.22    0.36
  12 -10  -4   -0.52    0.40
  12 -10  -4    0.43    0.50
 -12 -10   4    0.80    0.46
 -12 -10   4    0.32    0.40
 -12  10   4   -0.05    0.50
  12  10  -4    0.11    0.28
  12  10  -4    0.57    0.35
  10 -10  -4   22.18    1.34
 -10 -10   4   23.52    1.22
  10 -10  -4   20.19    1.39
 -10 -10   4   20.54    1.32
  10  10  -4   21.69    1.17
  10  10  -4   22.54    1.20
 -10  10   4   22.15    1.41
 -10  10   4   22.91    1.42
  -8 -10   4    2.29    0.52
   8 -10  -4    3.51    0.62
   8 -10  -4    1.57    0.55
   8 -10  -4    2.63    0.61
  -8 -10   4    2.79    0.58
   8  10  -4    3.06    0.51
  -8  10   4    2.60    0.60
  -8  10   4    1.43    0.50
   8  10  -4    1.57    0.45
  -8  10   4    2.44    0.64
  -6 -10   4   28.10    1.41
   6 -10  -4   27.64    1.57
   6 -10  -4   29.24    1.57
  -6 -10   4   26.40    1.52
   6 -10  -4   30.14    1.52
   6  10  -4   26.04    1.42
   6  10  -4   29.77    1.35
  -6  10   4   29.97    1.61
  -6  10   4   28.07    1.52
  -6  10   4   27.51    1.57
  -4 -10   4    2.81    0.53
   4 -10  -4    2.86    0.58
   4 -10  -4    3.13    0.60
   4 -10  -4    3.71    0.64
  -4 -10   4    3.50    0.62
   4  10  -4    3.51    0.56
  -4  10   4    3.54    0.63
   4  10  -4    2.81    0.54
  -4  10   4    2.51    0.57
  -4  10   4    3.31    0.64
   4  10  -4    2.22    0.50
   2 -10  -4  109.26    4.07
   2 -10  -4  109.92    4.07
  -2 -10   4  112.51    4.07
  -2 -10   4  115.23    3.91
   2 -10  -4  107.01    3.88
  -2  10   4  107.32    3.91
  -2  10   4  104.61    4.07
   2  10  -4  103.67    4.05
   2  10  -4  108.13    4.05
  -2  10   4  110.39    3.89
  -2  10   4  111.06    4.09
   2  10  -4  108.48    3.89
   0 -10  -4    2.84    0.55
   0 -10   4    2.79    0.58
   0 -10   4    2.89    0.57
   0 -10  -4    2.57    0.53
   0 -10   4    2.88    0.29
   0  10   4    2.49    0.53
   0  10   4    3.42    0.60
   0  10  -4    2.74    0.58
   0  10   4    2.93    0.49
   0  10   4    2.14    0.50
   0  10  -4    1.67    0.49
   0  10  -4    1.91    0.52
  -2 -10  -4   45.61    2.00
   2 -10   4   48.57    2.21
   2 -10   4   50.50    2.11
  -2 -10  -4   48.23    2.08
  -2  10  -4   43.41    2.10
   2  10   4   47.57    2.09
  -2  10  -4   45.16    2.18
   2  10   4   51.99    2.19
  -2  10  -4   47.80    2.21
   2  10   4   46.82    1.97
   2  10   4   46.00    2.06
  -4 -10  -4    0.22    0.38
   4 -10   4   -0.16    0.38
  -4 -10  -4    0.14    0.33
   4 -10   4   -0.06    0.40
  -4  10  -4    0.25    0.38
   4  10   4    0.22    0.37
   4  10   4   -0.11    0.26
   4  10   4    0.25    0.34
  -4  10  -4    0.73    0.44
   4  10   4    0.64    0.37
  -4  10  -4   -0.41    0.37
  -6 -10  -4   26.40    1.36
   6 -10   4   24.82    1.46
   6  10   4   24.74    1.37
  -6  10  -4   25.61    1.57
   6  10   4   27.24    1.41
  -6  10  -4   25.96    1.52
   8 -10   4    2.41    0.64
  -8 -10  -4    1.10    0.47
   8  10   4    1.84    0.48
  -8  10  -4    1.63    0.64
 -10 -10  -4    1.33    0.53
  10  10   4    1.01    0.41
 -10  10  -4    0.34    0.62
 -12 -10  -4    1.04    0.49
 -12  10  -4    1.69    0.74
  12  10   4    0.35    0.36
 -14 -10  -4   -0.75    0.43
 -14  10  -4    0.36    0.72
 -16 -10  -4   -0.45    0.46
 -16  10  -4    0.05    0.76
 -19 -11   4   -0.35    0.39
 -19  11   4    0.16    0.68
 -17 -11   4   -0.41    0.40
 -17  11   4   -0.33    0.60
 -15 -11   4    0.34    0.41
  15 -11  -4   -0.01    0.56
  15  11  -4    0.08    0.29
 -15  11   4    0.94    0.65
  13 -11  -4   -0.35    0.35
 -13 -11   4    0.03    0.41
  13 -11  -4   -0.59    0.48
 -13 -11   4    0.17    0.43
  13  11  -4   -0.08    0.32
 -13  11   4   -0.33    0.54
  11 -11  -4    6.04    0.84
 -11 -11   4    3.76    0.64
  11 -11  -4    6.31    0.76
 -11 -11   4    4.45    0.74
  11 -11  -4    4.65    0.83
  11  11  -4    5.51    0.65
 -11  11   4    6.27    0.89
  -9 -11   4   -0.31    0.37
  -9 -11   4   -0.10    0.41
   9 -11  -4    0.16    0.47
   9 -11  -4    0.03    0.45
   9  11  -4   -0.09    0.34
  -9  11   4   -0.29    0.47
  -9  11   4   -0.29    0.41
   9  11  -4    0.22    0.36
  -7 -11   4    1.32    0.52
  -7 -11   4    1.96    0.54
   7 -11  -4    1.83    0.58
   7 -11  -4    1.17    0.54
   7 -11  -4    2.74    0.61
  -7  11   4    2.20    0.59
  -7  11   4    1.20    0.53
   7  11  -4    2.04    0.52
   7  11  -4    2.70    0.52
  -7  11   4    1.91    0.59
   5 -11  -4   15.69    1.11
  -5 -11   4   14.51    1.13
  -5 -11   4   15.47    1.09
   5 -11  -4   16.58    1.23
   5 -11  -4   17.75    1.22
  -5  11   4   18.74    1.28
  -5  11   4   16.60    1.19
  -5  11   4   16.65    1.21
   5  11  -4   16.35    1.05
   5  11  -4   14.64    1.11
  -5  11   4   16.59    0.93
   5  11  -4   19.26    1.19
   3 -11  -4   34.73    1.72
  -3 -11   4   33.92    1.68
   3 -11  -4   35.78    1.78
   3 -11  -4   34.75    1.81
  -3 -11   4   29.98    1.75
   3  11  -4   34.20    1.65
  -3  11   4   33.29    1.48
  -3  11   4   36.19    1.81
   3  11  -4   34.38    1.75
   3  11  -4   31.82    1.71
  -3  11   4   34.00    1.79
  -3  11   4   33.24    1.67
   1 -11  -4    1.60    0.51
  -1 -11   4    0.35    0.47
  -1 -11   4    1.98    0.53
   1 -11  -4    0.73    0.47
  -1  11   4    1.34    0.45
   1  11  -4    0.61    0.44
  -1  11   4    1.63    0.50
  -1  11   4    0.64    0.34
  -1  11   4    0.64    0.47
   1  11  -4    0.64    0.43
   1  11  -4    0.89    0.46
  -1 -11  -4    3.52    0.62
   1 -11   4    2.54    0.60
  -1 -11  -4    3.43    0.62
   1 -11   4    2.63    0.64
  -1  11  -4    2.88    0.61
   1  11   4    2.31    0.59
  -1  11  -4    3.52    0.67
   1  11   4    2.14    0.52
  -1  11  -4    2.91    0.62
   1  11   4    3.07    0.52
   1  11   4    2.61    0.58
   3 -11   4    2.77    0.66
   3 -11   4    3.85    0.72
  -3 -11  -4    3.45    0.59
  -3 -11  -4    3.80    0.65
   3  11   4    2.92    0.56
   3  11   4    2.64    0.60
  -3  11  -4    3.70    0.70
  -3  11  -4    4.08    0.74
  -3  11  -4    4.01    0.73
  -5 -11  -4    4.93    0.70
   5 -11   4    4.55    0.75
   5  11   4    4.45    0.66
  -5  11  -4    7.24    0.93
   5  11   4    4.27    0.46
  -5  11  -4    4.48    0.81
   7 -11   4    0.80    0.56
  -7 -11  -4    0.87    0.49
  -7  11  -4    0.07    0.51
   7  11   4    0.69    0.43
  -9 -11  -4    0.41    0.46
  -9  11  -4    1.24    0.63
   9  11   4   -0.26    0.35
 -11 -11  -4    0.08    0.45
 -11  11  -4    0.83    0.69
 -13 -11  -4    0.55    0.53
 -13  11  -4    0.44    0.70
 -15 -11  -4   -0.24    0.49
 -15  11  -4   -0.09    0.72
 -18 -12   4   -0.04    0.44
 -18  12   4    0.58    0.73
 -16 -12   4   -0.56    0.44
 -16  12   4    0.46    0.69
 -14 -12   4    1.19    0.58
  14 -12  -4    1.13    0.69
 -14 -12   4    1.52    0.53
  14  12  -4    0.48    0.37
 -14  12   4    1.47    0.73
  12 -12  -4   -0.03    0.41
 -12 -12   4    0.87    0.53
 -12 -12   4   -0.62    0.43
  12 -12  -4    0.27    0.59
  12 -12  -4   -0.13    0.51
  12  12  -4    0.31    0.36
 -12  12   4    0.73    0.64
  10 -12  -4    7.11    0.94
  10 -12  -4    6.17    0.81
  10 -12  -4    7.85    1.04
 -10 -12   4    5.30    0.74
 -10 -12   4    6.22    0.87
 -10  12   4    6.65    0.96
  10  12  -4    5.08    0.70
   8 -12  -4    1.53    0.61
  -8 -12   4    0.97    0.48
  -8 -12   4    0.12    0.43
   8 -12  -4    1.47    0.63
  -8  12   4    1.76    0.60
   8  12  -4    1.39    0.50
  -8  12   4    0.19    0.56
   6 -12  -4    4.91    0.84
   6 -12  -4    5.69    0.84
   6 -12  -4    3.19    0.72
  -6 -12   4    3.63    0.69
  -6 -12   4    3.06    0.63
  -6  12   4    5.23    0.81
  -6  12   4    4.48    0.78
   6  12  -4    3.86    0.69
  -6  12   4    4.73    0.52
  -6  12   4    5.43    0.85
   4 -12  -4    1.34    0.50
  -4 -12   4    0.24    0.42
   4 -12  -4    0.87    0.50
   4 -12  -4    1.52    0.56
  -4 -12   4    1.01    0.52
  -4  12   4    0.60    0.52
   4  12  -4    0.46    0.46
  -4  12   4   -0.17    0.47
  -4  12   4    1.19    0.51
   4  12  -4    0.67    0.47
  -4  12   4    0.08    0.33
   2 -12  -4    5.82    0.82
   2 -12  -4    6.82    0.89
  -2 -12   4    5.60    0.82
   2  12  -4    6.57    0.84
  -2  12   4    6.74    0.92
  -2  12   4    5.74    0.84
   2  12  -4    6.27    0.87
  -2  12   4    5.16    0.61
  -2  12   4    5.58    0.79
   0 -12  -4    0.00    0.39
   0 -12   4   -0.29    0.46
   0 -12  -4    0.21    0.44
   0  12  -4   -0.18    0.39
   0  12  -4    0.66    0.48
   0  12   4    0.73    0.47
   0  12   4    0.38    0.47
   0  12  -4    0.42    0.49
   0  12   4   -0.28    0.29
   2 -12   4    0.65    0.52
  -2 -12  -4    0.77    0.48
   2 -12   4   -0.15    0.46
  -2  12  -4   -0.31    0.42
  -2  12  -4    0.80    0.51
   2  12   4    0.07    0.39
   2  12   4    0.49    0.47
  -2  12  -4    0.56    0.51
  -4 -12  -4    1.22    0.56
   4 -12   4    2.77    0.67
  -4  12  -4    1.94    0.65
  -4  12  -4    3.40    0.78
   4  12   4    1.95    0.54
   4  12   4    2.61    0.46
   6 -12   4    0.66    0.57
  -6 -12  -4   -0.36    0.44
   6  12   4    1.50    0.52
  -6  12  -4   -0.23    0.51
   8 -12   4    1.13    0.64
  -8 -12  -4    0.20    0.47
   8  12   4    0.11    0.43
  -8  12  -4    0.64    0.66
 -10 -12  -4    0.79    0.52
 -10  12  -4    0.10    0.62
 -12 -12  -4    0.08    0.50
 -12  12  -4    0.18    0.70
 -14 -12  -4   -0.59    0.50
 -14  12  -4   -0.56    0.69
 -17 -13   4   -0.16    0.47
 -17  13   4    0.17    0.72
 -15 -13   4   -0.80    0.46
 -15 -13   4   -0.56    0.43
 -15  13   4    0.23    0.71
 -13 -13   4    0.55    0.58
 -13 -13   4    1.32    0.58
  13 -13  -4    1.43    0.70
 -13  13   4    0.30    0.70
 -11 -13   4    0.53    0.53
 -11 -13   4   -0.91    0.43
  11 -13  -4    0.07    0.52
  11 -13  -4    0.18    0.59
  11 -13  -4   -0.17    0.40
 -11  13   4   -0.13    0.60
  11  13  -4   -0.39    0.39
  -9 -13   4    0.88    0.55
  -9 -13   4    1.30    0.58
   9 -13  -4    0.75    0.62
   9 -13  -4    0.48    0.47
   9 -13  -4    0.71    0.60
   9  13  -4    0.94    0.48
  -9  13   4    0.35    0.56
  -7 -13   4    2.81    0.72
  -7 -13   4    2.57    0.63
   7 -13  -4    2.41    0.68
   7 -13  -4    3.26    0.76
  -7  13   4    2.93    0.72
   7  13  -4    1.96    0.57
  -7  13   4    3.31    0.78
   5 -13  -4    0.19    0.54
  -5 -13   4   -0.40    0.44
   5 -13  -4    0.79    0.56
  -5 -13   4    0.00    0.44
  -5  13   4   -0.89    0.38
  -5  13   4   -0.39    0.49
   5  13  -4   -0.42    0.42
  -3 -13   4    0.44    0.46
  -3 -13   4   -0.33    0.47
   3 -13  -4   -0.38    0.38
   3 -13  -4    0.10    0.51
   3  13  -4    0.16    0.45
   3  13  -4    0.93    0.53
  -3  13   4    0.95    0.52
  -3  13   4    0.47    0.46
  -3  13   4    0.01    0.27
  -1 -13   4   -0.51    0.51
   1 -13  -4   -0.42    0.45
   1  13  -4    0.24    0.51
  -1  13   4    0.57    0.50
   1  13  -4    0.34    0.51
  -1  13   4   -0.44    0.43
   1 -13   4    0.75    0.54
  -1 -13  -4    0.85    0.54
  -1  13  -4    1.04    0.58
   1  13   4    0.61    0.52
  -1  13  -4   -0.06    0.50
   1  13   4    0.31    0.48
  -3 -13  -4    0.13    0.46
   3 -13   4    0.56    0.54
  -3  13  -4    0.46    0.54
  -3  13  -4    1.35    0.66
   3  13   4    0.61    0.52
  -5 -13  -4    0.40    0.52
   5 -13   4   -0.39    0.51
  -5  13  -4    0.49    0.63
   5  13   4   -0.42    0.41
   7 -13   4    0.62    0.65
  -7 -13  -4   -0.47    0.45
  -7  13  -4    0.13    0.64
   7  13   4    0.53    0.46
  -9 -13  -4   -0.82    0.49
  -9  13  -4    0.27    0.70
 -11 -13  -4    0.47    0.56
 -11  13  -4    0.68    0.79
 -13 -13  -4   -0.32    0.55
 -13  13  -4    0.06    0.76
 -16 -14   4    0.06    0.55
 -16  14   4    1.16    0.81
  14 -14  -4    0.97    0.71
 -14 -14   4   -0.75    0.53
 -14  14   4    0.17    0.73
 -12 -14   4    1.15    0.61
  12 -14  -4    0.21    0.65
 -12  14   4    0.61    0.71
 -10 -14   4    0.73    0.58
  10 -14  -4    2.19    0.78
  10 -14  -4    1.01    0.59
 -10 -14   4    0.71    0.61
  10 -14  -4    2.18    0.72
  10  14  -4    1.69    0.56
 -10  14   4    1.75    0.80
   8 -14  -4    0.64    0.62
  -8 -14   4   -0.36    0.47
  -8 -14   4    0.20    0.55
   8 -14  -4    0.19    0.52
   8 -14  -4   -0.28    0.48
  -8  14   4   -0.23    0.59
   8  14  -4    0.01    0.46
   6 -14  -4   -0.85    0.45
   6 -14  -4    1.83    0.63
   6 -14  -4    0.64    0.52
  -6 -14   4   -0.04    0.52
  -6 -14   4   -0.37    0.45
  -6  14   4    0.35    0.52
  -6  14   4    0.72    0.64
   6  14  -4   -0.18    0.48
   4 -14  -4    2.11    0.65
  -4 -14   4    2.66    0.69
  -4 -14   4    0.94    0.57
  -4  14   4    1.57    0.63
  -4  14   4    1.61    0.65
   4  14  -4    1.90    0.65
  -2 -14   4    7.12    1.00
   2 -14  -4    6.35    0.91
   2  14  -4    8.74    1.03
  -2  14   4    7.79    1.05
  -2  14   4    7.20    0.97
   2  14  -4    6.35    0.94
   0 -14   4    1.38    0.66
   0 -14  -4    0.59    0.57
   0  14   4   -0.30    0.51
   0  14  -4    0.42    0.58
   0  14  -4    0.74    0.58
   0  14   4    1.04    0.60
   2 -14   4    2.20    0.71
  -2 -14  -4    1.33    0.61
   2  14   4    1.22    0.57
  -2  14  -4    2.03    0.71
  -2  14  -4    0.93    0.67
  -4 -14  -4    0.36    0.55
   4 -14   4   -0.03    0.58
   4  14   4    0.15    0.48
  -4  14  -4    0.07    0.64
   6 -14   4    3.60    0.89
  -6 -14  -4    2.96    0.75
   6  14   4    3.19    0.71
  -6  14  -4    3.10    0.88
  -8 -14  -4    0.18    0.58
  -8  14  -4    0.44    0.73
 -10 -14  -4   -0.38    0.55
 -10  14  -4    0.84    0.80
 -12 -14  -4   -0.13    0.60
 -12  14  -4   -0.14    0.76
 -15 -15   4   -0.24    0.56
 -15  15   4   -1.12    0.70
 -13 -15   4    0.29    0.62
  13 -15  -4    0.47    0.66
 -13  15   4    1.16    0.76
  11 -15  -4    1.00    0.71
 -11 -15   4    0.82    0.64
  11 -15  -4    1.35    0.65
 -11  15   4    1.77    0.84
  -9 -15   4    1.99    0.71
   9 -15  -4    0.62    0.69
   9 -15  -4    2.38    0.69
   9 -15  -4    3.60    0.90
  -9  15   4    1.27    0.79
  -7 -15   4    0.39    0.59
   7 -15  -4    1.16    0.62
   7 -15  -4    0.08    0.61
   7  15  -4    0.05    0.50
  -7  15   4    0.32    0.66
   5 -15  -4    0.46    0.56
  -5 -15   4    0.34    0.58
   5 -15  -4    0.09    0.50
  -5  15   4    0.21    0.55
  -5  15   4   -0.36    0.51
   5  15  -4    0.81    0.61
  -3 -15   4    2.22    0.76
   3 -15  -4    4.24    0.83
   3  15  -4    2.96    0.76
  -3  15   4    4.11    0.86
  -3  15   4    2.63    0.83
  -1 -15   4    2.33    0.77
   1 -15  -4    3.49    0.83
  -1  15   4    3.85    0.85
   1  15  -4    4.25    0.86
   1  15  -4    2.69    0.79
   1 -15   4    0.86    0.68
  -1 -15  -4    0.30    0.59
   1  15   4    0.29    0.60
  -1  15  -4    0.56    0.62
  -1  15  -4   -0.35    0.60
  -3 -15  -4    0.34    0.59
   3 -15   4    0.17    0.64
   3  15   4   -0.42    0.50
  -3  15  -4   -0.26    0.62
   5 -15   4    1.78    0.72
  -5 -15  -4    2.31    0.73
  -5  15  -4    2.57    0.86
   7 -15   4    1.76    0.80
  -7 -15  -4    4.34    0.83
  -7  15  -4    1.93    0.88
  -9 -15  -4   -0.42    0.58
  -9  15  -4   -0.20    0.76
 -11 -15  -4   -0.32    0.60
 -11  15  -4    1.52    0.89
 -14 -16   4    2.16    0.74
 -14  16   4    1.32    0.87
 -12 -16   4   -0.12    0.60
 -12  16   4   -0.34    0.76
  10 -16  -4    3.37    0.90
 -10 -16   4    4.21    0.87
 -10  16   4    2.80    0.87
  -8 -16   4   -0.69    0.54
   8 -16  -4    0.37    0.69
  -8  16   4   -0.54    0.59
   6 -16  -4    5.02    0.97
  -6 -16   4    3.78    0.89
   6  16  -4    2.13    0.76
  -6  16   4    3.97    0.93
   4 -16  -4    1.36    0.75
  -4 -16   4    1.43    0.73
  -4  16   4    1.29    0.66
  -4  16   4    0.62    0.64
   4  16  -4    1.04    0.61
  -2 -16   4    3.99    0.92
   2 -16  -4    5.98    1.00
  -2  16   4    3.14    0.85
   2  16  -4    7.20    1.11
   0 -16   4    0.20    0.68
   0 -16  -4   -0.26    0.53
   0  16   4    0.04    0.63
   0  16  -4    0.54    0.67
   0  16  -4   -0.08    0.57
   2 -16   4    3.46    0.90
  -2 -16  -4    3.08    0.78
  -2  16  -4    4.01    0.96
   2  16   4    2.41    0.77
  -4 -16  -4    0.15    0.60
   4 -16   4   -0.30    0.66
  -4  16  -4   -0.06    0.73
   6 -16   4    1.59    0.79
  -6 -16  -4    1.45    0.75
  -6  16  -4    0.83    0.77
  -8 -16  -4    0.02    0.66
  -8  16  -4   -0.45    0.76
 -10 -16  -4    0.01    0.69
 -10  16  -4   -0.33    0.82
 -13  17   4    0.88    0.89
 -11 -17   4    0.75    0.70
 -11  17   4    1.01    0.85
   9 -17  -4    1.30    0.80
  -9 -17   4   -0.12    0.64
  -9  17   4    0.95    0.79
  -7 -17   4    1.79    0.77
   7 -17  -4    3.35    0.93
  -7  17   4    2.71    0.93
   5 -17  -4    0.59    0.73
  -5 -17   4    1.14    0.75
  -5  17   4    1.89    0.82
   3 -17  -4    3.40    0.90
  -3 -17   4    2.75    0.87
  -3  17   4    2.07    0.84
   3  17  -4    1.97    0.81
   1 -17  -4    0.92    0.67
  -1 -17   4    1.06    0.72
  -1  17   4    0.76    0.74
   1  17  -4   -0.43    0.60
   1 -17   4    6.02    1.08
  -1 -17  -4    6.95    1.08
  -3 -17  -4    3.89    0.93
   3 -17   4    2.02    0.89
  -3  17  -4    2.49    0.93
   5 -17   4    0.34    0.77
  -5 -17  -4   -0.33    0.59
  -5  17  -4   -0.50    0.73
  -7 -17  -4    0.32    0.69
  -7  17  -4    1.94    0.96
 -10 -18   4    2.21    0.86
 -10  18   4    1.74    0.94
  -8 -18   4    0.86    0.73
   8 -18  -4   -1.14    0.68
  -8  18   4    0.71    0.85
   6 -18  -4    3.89    1.01
  -6 -18   4    2.01    0.86
  -6  18   4    1.56    0.88
  -4 -18   4    0.77    0.76
   4 -18  -4   -0.10    0.75
  -2 -18   4    1.94    0.79
   2 -18  -4    0.78    0.77
  -2  18   4    0.40    0.77
   0 -18  -4    0.97    0.79
   0 -18   4    0.99    0.84
   2 -18   4    3.58    1.01
  -2 -18  -4    3.15    0.94
  -4 -18  -4   -0.27    0.66
   4 -18   4    0.21    0.79
  -4  18  -4    0.52    0.87
  -6 -18  -4    0.16    0.77
  -6  18  -4    1.31    0.93
  -5 -19   4    2.02    0.88
   5 -19  -4    0.89    0.83
  -3 -19   4    0.08    0.80
   3 -19  -4    0.10    0.80
   1 -19  -4   -0.01    0.73
  -1 -19   4   -0.16    0.78
  -1 -19  -4    0.92    0.79
   1 -19   4    3.12    0.97
 -24   0   5    0.09    0.46
 -22   0   5    0.02    0.41
 -20   0   5   -0.09    0.45
 -20   0   5    0.27    0.37
  18   0  -5   -0.17    0.22
 -18   0   5   -0.35    0.32
 -18   0   5   -0.32    0.39
 -16   0   5   -0.27    0.27
 -16   0   5   -0.24    0.23
  16   0  -5    0.33    0.28
 -16   0   5   -0.03    0.38
  14   0  -5   -0.09    0.15
 -14   0   5    0.01    0.21
  14   0  -5   -0.10    0.22
 -14   0   5    0.15    0.35
 -14   0   5    0.21    0.24
  14   0  -5   -0.26    0.21
 -14   0   5   -0.09    0.26
 -12   0   5    0.04    0.30
  12   0  -5    0.00    0.16
 -12   0   5    0.05    0.25
 -12   0   5   -0.24    0.20
  12   0  -5    0.05    0.21
 -12   0   5    0.10    0.22
  12   0  -5    0.08    0.16
  12   0  -5    0.14    0.22
 -10   0   5    0.29    0.27
 -10   0   5    0.04    0.20
  10   0  -5   -0.02    0.17
  10   0  -5    0.08    0.21
  10   0  -5   -0.20    0.19
 -10   0   5    0.03    0.21
 -10   0   5   -0.17    0.21
 -10   0   5    0.03    0.20
  -8   0   5    0.08    0.22
   8   0  -5   -0.06    0.19
   8   0  -5    0.21    0.19
  -8   0   5   -0.18    0.18
  -8   0   5   -0.09    0.17
   8   0  -5    0.18    0.18
  -8   0   5    0.14    0.18
  -8   0   5    0.25    0.26
   6   0  -5   -0.08    0.17
   6   0  -5    0.02    0.18
  -6   0   5    0.44    0.21
  -6   0   5    0.00    0.19
   6   0  -5   -0.02    0.16
  -6   0   5   -0.10    0.17
  -6   0   5   -0.04    0.22
  -4   0   5   -0.07    0.19
  -4   0   5    0.03    0.20
   4   0  -5   -0.11    0.19
   4   0  -5   -0.30    0.15
   4   0  -5   -0.08    0.17
  -4   0   5   -0.09    0.17
  -4   0   5   -0.04    0.17
  -2   0   5   -0.04    0.18
   2   0  -5    0.10    0.19
  -2   0   5   -0.12    0.18
  -2   0   5    0.12    0.19
  -2   0   5    0.02    0.18
   2   0  -5   -0.23    0.16
   0   0   5    0.03    0.22
   0   0   5    0.03    0.20
   0   0  -5   -0.24    0.18
   0   0   5    0.01    0.20
   0   0  -5   -0.17    0.20
   0   0   5   -0.01    0.20
   2   0   5    0.63    0.30
  -2   0  -5    0.19    0.24
  -2   0  -5    0.16    0.20
   2   0   5    0.15    0.20
   2   0   5    0.13    0.21
   2   0   5    0.07    0.21
   2   0   5    1.37    0.52
  -4   0  -5   -0.15    0.22
   4   0   5    0.12    0.29
   4   0   5   -0.03    0.07
  -4   0  -5    0.15    0.23
   4   0   5    0.25    0.25
   4   0   5    0.56    0.24
   6   0   5   -0.50    0.20
  -6   0  -5   -0.25    0.22
   6   0   5   -0.04    0.22
  -6   0  -5   -0.31    0.26
   6   0   5   -0.02    0.23
   6   0   5   -0.40    0.31
  -6   0  -5    0.23    0.23
   8   0   5    0.08    0.28
  -8   0  -5   -0.60    0.24
  -8   0  -5   -0.40    0.22
   8   0   5    0.04    0.21
  -8   0  -5    0.39    0.32
   8   0   5   -0.30    0.23
 -10   0  -5   -0.24    0.33
  10   0   5   -0.01    0.29
 -10   0  -5    0.31    0.29
  10   0   5    0.42    0.32
  12   0   5   -0.31    0.31
 -12   0  -5   -0.29    0.37
  12   0   5    0.19    0.34
 -14   0  -5   -0.47    0.41
  14   0   5    0.08    0.32
 -16   0  -5   -0.17    0.48
 -18   0  -5    0.38    0.54
 -23  -1   5   -0.15    0.37
 -23   1   5    0.13    0.47
 -21  -1   5   -0.01    0.35
 -21   1   5    0.14    0.44
 -21   1   5    0.09    0.51
 -19  -1   5   -0.04    0.39
  19  -1  -5   -0.22    0.24
 -19  -1   5    0.21    0.34
 -19   1   5   -0.34    0.35
 -17  -1   5    6.50    0.57
 -17  -1   5    6.07    0.69
  17  -1  -5    6.10    0.57
  17  -1  -5    5.67    0.53
  17   1  -5    5.96    0.43
 -17   1   5    6.69    0.65
 -17   1   5    5.93    0.57
 -15  -1   5   11.44    0.63
  15  -1  -5   10.93    0.68
 -15  -1   5   10.49    0.66
 -15  -1   5   10.77    0.78
 -15  -1   5   12.81    0.68
  15  -1  -5    9.77    0.69
 -15   1   5   11.08    0.72
  15   1  -5    9.88    0.62
 -15   1   5   10.00    0.72
  13  -1  -5    0.83    0.18
  13  -1  -5    1.12    0.31
 -13  -1   5    0.41    0.31
  13  -1  -5    0.60    0.20
 -13  -1   5    1.14    0.27
 -13  -1   5    0.31    0.22
 -13  -1   5   -0.03    0.24
  13  -1  -5    0.64    0.27
 -13   1   5    0.87    0.29
 -13   1   5    0.82    0.34
 -13   1   5    0.77    0.28
  13   1  -5    1.07    0.27
  13   1  -5    0.44    0.21
 -11  -1   5   -0.18    0.19
  11  -1  -5    0.41    0.25
  11  -1  -5    0.03    0.19
 -11  -1   5   -0.03    0.19
 -11  -1   5    0.05    0.21
  11  -1  -5    0.28    0.23
 -11  -1   5   -0.14    0.24
 -11  -1   5   -0.33    0.22
 -11   1   5    0.18    0.25
 -11   1   5   -0.05    0.21
  11   1  -5   -0.07    0.20
 -11   1   5    0.15    0.21
 -11   1   5   -0.31    0.20
  11   1  -5   -0.05    0.19
 -11   1   5    0.52    0.33
  11   1  -5   -0.13    0.16
  -9  -1   5    5.21    0.44
  -9  -1   5    5.79    0.48
   9  -1  -5    5.05    0.45
  -9  -1   5    4.73    0.50
   9  -1  -5    5.07    0.48
  -9  -1   5    4.51    0.44
  -9  -1   5    4.91    0.44
   9  -1  -5    4.14    0.44
   9   1  -5    4.82    0.45
  -9   1   5    5.06    0.53
  -9   1   5    4.75    0.47
  -9   1   5    5.19    0.48
  -9   1   5    4.57    0.47
  -9   1   5    5.49    0.48
  -7  -1   5    4.47    0.47
  -7  -1   5    4.41    0.42
  -7  -1   5    3.97    0.41
  -7  -1   5    3.83    0.41
  -7  -1   5    5.03    0.44
   7  -1  -5    4.61    0.47
   7  -1  -5    4.04    0.42
   7   1  -5    4.17    0.40
  -7   1   5    4.83    0.47
  -7   1   5    5.55    0.54
  -7   1   5    3.99    0.42
   7   1  -5    5.20    0.47
  -7   1   5    3.89    0.43
   5  -1  -5    0.09    0.20
  -5  -1   5    0.02    0.17
   5  -1  -5    0.09    0.20
  -5  -1   5    0.22    0.21
   5  -1  -5    0.24    0.20
  -5  -1   5    0.20    0.20
  -5  -1   5    0.23    0.21
  -5   1   5    0.16    0.20
  -5   1   5    0.31    0.20
   5   1  -5    0.06    0.19
  -5   1   5   -0.20    0.16
  -5   1   5   -0.23    0.18
   5   1  -5    0.04    0.18
   3  -1  -5    1.38    0.30
   3  -1  -5    0.83    0.24
  -3  -1   5    1.41    0.30
  -3  -1   5    1.19    0.28
  -3  -1   5    1.21    0.28
   3  -1  -5    0.95    0.26
  -3  -1   5    1.97    0.31
  -3   1   5    1.51    0.30
  -3   1   5    1.70    0.31
   3   1  -5    1.32    0.28
   3   1  -5    1.40    0.28
  -3   1   5    1.03    0.28
  -3   1   5    1.40    0.31
   1  -1  -5   -0.03    0.18
  -1  -1   5   -0.18    0.19
   1  -1  -5    0.16    0.21
  -1  -1   5    0.02    0.19
  -1  -1   5    0.29    0.23
   1  -1  -5    0.42    0.21
  -1  -1   5   -0.16    0.20
  -1   1   5    0.13    0.22
   1   1  -5   -0.03    0.20
  -1   1   5   -0.14    0.19
   1   1  -5   -0.33    0.17
  -1   1   5   -0.01    0.19
  -1   1   5    0.22    0.20
   1  -1   5   29.37    1.34
  -1  -1  -5   32.03    1.32
  -1  -1  -5   33.35    1.31
   1  -1   5   31.05    1.27
   1  -1   5   30.32    1.34
   1  -1   5   31.25    1.30
  -1   1  -5   32.10    1.35
  -1   1  -5   31.65    1.30
   1   1   5   32.83    1.27
   1   1   5   32.01    1.34
   1   1   5   30.23    1.33
   1   1   5   31.48    1.27
   3  -1   5    1.87    0.35
   3  -1   5    2.16    0.43
  -3  -1  -5    1.74    0.34
  -3  -1  -5    1.77    0.33
   3  -1   5    1.95    0.34
   3   1   5    1.50    0.34
  -3   1  -5    2.04    0.37
   3   1   5    1.39    0.41
   3   1   5    1.85    0.32
  -3   1  -5    2.32    0.37
   3   1   5    2.05    0.35
   5  -1   5    6.80    0.55
   5  -1   5    3.55    0.47
   5  -1   5    6.46    0.74
  -5  -1  -5    5.75    0.55
  -5  -1  -5    6.02    0.56
  -5  -1  -5    7.09    0.58
   5   1   5    7.54    0.50
   5   1   5    5.37    0.69
   5   1   5    6.13    0.57
  -5   1  -5    6.28    0.60
  -5   1  -5    5.17    0.54
   5   1   5    5.38    0.55
  -7  -1  -5    2.08    0.41
  -7  -1  -5    1.61    0.35
   7  -1   5    1.65    0.37
   7  -1   5    1.55    0.49
  -7  -1  -5    2.18    0.37
   7  -1   5    1.65    0.38
   7  -1   5    2.56    0.37
   7   1   5    2.03    0.39
  -7   1  -5    1.77    0.37
  -7   1  -5    1.96    0.43
   7   1   5    1.28    0.34
   7   1   5    0.69    0.45
   9  -1   5    8.57    0.76
  -9  -1  -5    8.62    0.71
   9  -1   5    9.65    0.79
  -9  -1  -5    9.29    0.76
   9   1   5   10.58    0.73
  -9   1  -5    8.14    0.76
  -9   1  -5    8.75    0.75
   9   1   5    9.18    0.74
  11  -1   5    1.51    0.43
  11  -1   5    1.16    0.41
 -11  -1  -5    1.04    0.43
 -11   1  -5    1.25    0.45
  11   1   5    0.93    0.35
  11   1   5    1.85    0.40
 -13  -1  -5    0.69    0.44
  13  -1   5    0.57    0.36
 -13   1  -5    0.71    0.46
  13   1   5    0.79    0.35
 -15  -1  -5    3.51    0.63
  15   1   5    2.08    0.45
 -15   1  -5    3.55    0.65
 -17  -1  -5    1.57    0.60
 -17   1  -5    2.55    0.65
 -19  -1  -5    0.01    0.52
 -19   1  -5    0.43    0.59
 -24   2   5   -0.28    0.51
 -22  -2   5    0.35    0.35
 -22   2   5    0.68    0.48
 -20  -2   5    0.08    0.32
  20  -2  -5    0.53    0.31
 -20   2   5   -0.35    0.39
  18  -2  -5    2.52    0.46
  18  -2  -5    2.69    0.43
 -18  -2   5    3.06    0.53
 -18  -2   5    2.84    0.41
 -18   2   5    3.07    0.55
 -16  -2   5    6.02    0.64
  16  -2  -5    4.99    0.56
 -16  -2   5    5.41    0.49
  16  -2  -5    5.30    0.53
 -16   2   5    4.76    0.60
  16   2  -5    4.64    0.38
 -16   2   5    4.12    0.55
 -14  -2   5    0.44    0.21
 -14  -2   5    0.09    0.31
  14  -2  -5    0.42    0.30
 -14  -2   5   -0.16    0.21
  14  -2  -5    0.30    0.13
 -14  -2   5    0.28    0.26
  14  -2  -5    0.25    0.28
  14   2  -5    0.43    0.23
 -14   2   5    0.13    0.28
 -14   2   5    0.25    0.29
 -12  -2   5   11.92    0.66
 -12  -2   5   12.17    0.66
 -12  -2   5   12.22    0.73
  12  -2  -5   11.83    0.73
  12  -2  -5   12.46    0.76
 -12  -2   5   11.77    0.66
  12  -2  -5   12.16    0.66
 -12   2   5   10.91    0.72
  12   2  -5   10.81    0.66
  12   2  -5   11.60    0.65
 -12   2   5   11.70    0.75
 -12   2   5   12.34    0.75
  10  -2  -5   13.58    0.80
 -10  -2   5   14.52    0.72
  10  -2  -5   13.99    0.79
 -10  -2   5   13.39    0.70
 -10  -2   5   14.87    0.73
 -10  -2   5   13.48    0.71
  10  -2  -5   13.98    0.74
 -10  -2   5   14.49    0.78
  10   2  -5   12.20    0.70
 -10   2   5   13.52    0.77
  10   2  -5   13.29    0.63
 -10   2   5   13.28    0.78
  10   2  -5   14.11    0.74
 -10   2   5   15.55    0.82
 -10   2   5   14.14    0.80
  -8  -2   5   12.86    0.66
  -8  -2   5   12.87    0.73
  -8  -2   5   12.88    0.70
  -8  -2   5   13.52    0.68
   8  -2  -5   11.84    0.72
  -8  -2   5   12.35    0.68
   8  -2  -5   11.88    0.69
   8   2  -5   12.60    0.63
  -8   2   5   11.69    0.75
   8   2  -5   12.45    0.68
  -8   2   5   13.81    0.74
  -8   2   5   12.82    0.75
  -8   2   5   12.21    0.73
   6  -2  -5   15.96    0.86
   6  -2  -5   15.16    0.79
  -6  -2   5   17.15    0.83
  -6  -2   5   17.73    0.80
  -6  -2   5   16.69    0.79
  -6  -2   5   17.14    0.84
  -6  -2   5   15.73    0.80
   6  -2  -5   16.79    0.85
  -6   2   5   15.73    0.80
  -6   2   5   14.47    0.82
  -6   2   5   16.32    0.86
   6   2  -5   14.65    0.81
   6   2  -5   16.41    0.78
   4  -2  -5   45.47    1.69
  -4  -2   5   44.10    1.74
  -4  -2   5   45.06    1.66
   4  -2  -5   44.24    1.75
  -4  -2   5   42.62    1.68
  -4  -2   5   44.55    1.73
   4  -2  -5   45.05    1.76
  -4   2   5   45.98    1.70
  -4   2   5   46.56    1.76
  -4   2   5   44.73    1.77
   4   2  -5   46.19    1.67
   4   2  -5   44.62    1.74
  -4   2   5   47.12    1.70
   2  -2  -5   19.58    0.92
  -2  -2   5   18.98    0.96
   2  -2  -5   19.65    0.95
  -2  -2   5   20.24    0.93
   2  -2  -5   20.99    0.97
  -2  -2   5   20.21    0.94
  -2   2   5   20.68    0.94
   2   2  -5   20.94    0.95
  -2   2   5   19.92    0.97
  -2   2   5   19.62    0.97
  -2   2   5   18.96    0.91
   2   2  -5   19.58    0.96
   0  -2  -5    9.11    0.64
   0  -2   5   10.29    0.67
   0  -2  -5   10.69    0.64
   0  -2   5   11.44    0.67
   0  -2   5   10.95    0.68
   0  -2  -5   10.48    0.66
   0   2  -5    9.87    0.67
   0   2   5   10.74    0.62
   0   2   5    9.66    0.61
   0   2  -5   10.70    0.68
   0   2   5   10.32    0.67
   0   2   5   11.81    0.68
   2  -2   5   39.32    1.63
   2  -2   5   41.27    1.54
  -2  -2  -5   38.61    1.52
  -2  -2  -5   37.78    1.57
   2  -2   5   37.06    1.76
  -2  -2  -5   42.08    1.61
   2   2   5   40.04    1.61
   2   2   5   39.07    1.51
   2   2   5   39.43    1.82
  -2   2  -5   41.29    1.64
   2   2   5   37.39    1.48
  -2   2  -5   41.25    1.59
   2   2   5   38.87    1.59
   4  -2   5    0.37    0.34
   4  -2   5    0.64    0.26
  -4  -2  -5    0.51    0.26
   4  -2   5    0.10    0.25
  -4  -2  -5    0.87    0.31
  -4  -2  -5    0.53    0.25
   4   2   5    1.00    0.30
   4   2   5    0.70    0.27
   4   2   5    0.47    0.26
   4   2   5    0.70    0.36
  -4   2  -5    0.39    0.26
  -4   2  -5    0.60    0.30
   4   2   5    0.62    0.25
   6  -2   5    2.96    0.41
  -6  -2  -5    2.57    0.40
   6  -2   5    3.39    0.58
  -6  -2  -5    2.16    0.41
   6  -2   5    2.64    0.43
  -6  -2  -5    2.47    0.39
  -6   2  -5    3.00    0.47
   6   2   5    2.75    0.41
   6   2   5    2.10    0.52
  -6   2  -5    2.61    0.43
   6   2   5    2.66    0.41
   8  -2   5    3.29    0.42
   8  -2   5    4.37    0.56
  -8  -2  -5    3.09    0.45
  -8  -2  -5    2.53    0.45
  -8  -2  -5    3.96    0.48
   8   2   5    3.11    0.36
   8   2   5    3.00    0.45
  -8   2  -5    3.69    0.55
   8   2   5    2.78    0.44
  -8   2  -5    3.02    0.48
 -10  -2  -5    3.66    0.53
  10  -2   5    3.29    0.54
 -10  -2  -5    2.47    0.44
 -10   2  -5    3.48    0.58
  10   2   5    2.90    0.46
 -10   2  -5    3.22    0.52
  10   2   5    3.79    0.49
  12  -2   5   -0.23    0.32
 -12  -2  -5    0.27    0.38
  12   2   5    0.50    0.35
  12   2   5    0.28    0.33
 -12   2  -5    0.29    0.42
 -14  -2  -5    0.58    0.44
  14  -2   5    0.78    0.42
  14   2   5    0.99    0.36
 -14   2  -5    1.79    0.56
 -16  -2  -5    0.34    0.48
 -16   2  -5    0.50    0.55
 -18  -2  -5    0.40    0.48
 -18   2  -5    0.39    0.57
 -23   3   5   -0.84    0.49
 -21  -3   5    0.09    0.31
 -21   3   5    0.46    0.50
 -19  -3   5    1.09    0.41
  19  -3  -5   -0.27    0.32
 -19  -3   5   -0.08    0.29
 -19   3   5    0.36    0.45
 -17  -3   5    0.65    0.28
  17  -3  -5    0.05    0.31
  17  -3  -5    0.13    0.34
 -17  -3   5    0.09    0.35
 -17   3   5   -0.11    0.41
 -15  -3   5    0.08    0.27
 -15  -3   5    0.57    0.34
  15  -3  -5    0.41    0.32
  15  -3  -5    0.30    0.31
 -15  -3   5    0.71    0.21
 -15  -3   5    0.53    0.25
 -15   3   5    0.59    0.39
 -15   3   5    0.77    0.34
  15   3  -5    0.30    0.20
 -13  -3   5    0.19    0.28
 -13  -3   5    0.02    0.19
  13  -3  -5    0.21    0.24
  13  -3  -5    0.01    0.26
 -13  -3   5    0.02    0.23
  13  -3  -5    0.02    0.26
 -13  -3   5    0.15    0.22
 -13   3   5    0.31    0.32
  13   3  -5   -0.05    0.22
 -13   3   5   -0.07    0.26
  13   3  -5    0.29    0.21
 -13   3   5    0.36    0.29
  11  -3  -5   22.94    1.06
 -11  -3   5   23.25    0.99
 -11  -3   5   23.55    1.00
 -11  -3   5   22.75    1.06
  11  -3  -5   21.84    1.13
 -11  -3   5   22.48    1.01
  11  -3  -5   23.37    1.14
 -11   3   5   23.50    1.15
  11   3  -5   24.00    1.09
 -11   3   5   23.69    1.14
  11   3  -5   22.23    0.99
 -11   3   5   24.12    1.14
  -9  -3   5    9.69    0.60
  -9  -3   5    9.04    0.60
  -9  -3   5    9.86    0.60
   9  -3  -5   10.45    0.69
  -9  -3   5   10.09    0.61
  -9  -3   5   11.02    0.67
   9  -3  -5   10.66    0.68
  -9   3   5    8.66    0.66
   9   3  -5   10.14    0.59
   9   3  -5    9.93    0.53
  -9   3   5    9.62    0.68
   9   3  -5   10.65    0.66
  -9   3   5    9.97    0.71
   7  -3  -5   51.67    1.99
  -7  -3   5   52.96    1.84
  -7  -3   5   50.82    1.83
  -7  -3   5   49.64    1.90
   7  -3  -5   49.06    1.97
  -7  -3   5   49.83    1.86
  -7  -3   5   49.60    1.90
   7  -3  -5   50.50    1.88
  -7   3   5   48.99    1.98
  -7   3   5   50.12    1.90
   7   3  -5   52.31    1.92
   7   3  -5   51.39    1.79
  -7   3   5   53.42    1.98
   5  -3  -5    8.19    0.57
  -5  -3   5    8.47    0.57
   5  -3  -5    8.22    0.59
  -5  -3   5    7.28    0.54
  -5  -3   5    8.34    0.57
   5  -3  -5    7.72    0.64
   5   3  -5    7.61    0.58
  -5   3   5    9.05    0.58
  -5   3   5    7.80    0.59
   5   3  -5    8.64    0.56
  -5   3   5    8.53    0.67
  -5   3   5    8.56    0.62
   3  -3  -5   85.28    3.03
  -3  -3   5   95.21    3.18
  -3  -3   5   88.31    3.04
   3  -3  -5   88.37    3.17
  -3  -3   5   90.24    3.02
   3  -3  -5   88.25    3.18
  -3   3   5   91.43    3.19
  -3   3   5   91.84    3.03
   3   3  -5   89.23    3.17
   3   3  -5   94.29    3.05
  -3   3   5   91.35    3.21
  -3   3   5   89.50    3.03
   1  -3  -5   31.02    1.37
   1  -3  -5   31.91    1.32
  -1  -3   5   33.42    1.34
   1  -3  -5   32.02    1.38
  -1  -3   5   33.07    1.41
  -1  -3   5   31.91    1.36
  -1   3   5   33.66    1.41
  -1   3   5   34.07    1.40
  -1   3   5   32.07    1.30
   1   3  -5   31.78    1.40
   1   3  -5   32.96    1.36
  -1   3   5   35.37    1.35
   1  -3   5   51.70    1.94
  -1  -3  -5   51.19    1.93
   1  -3   5   54.96    2.08
  -1  -3  -5   53.07    2.01
  -1  -3  -5   49.96    2.00
   1   3   5   54.12    1.92
   1   3   5   56.26    2.30
   1   3   5   54.33    2.03
  -1   3  -5   53.52    2.00
   1   3   5   52.79    2.05
   1   3   5   52.30    1.88
  -1   3  -5   51.70    2.05
   3  -3   5   18.51    1.04
   3  -3   5   19.24    0.91
  -3  -3  -5   14.74    0.84
  -3  -3  -5   17.38    0.88
  -3  -3  -5   16.47    0.88
   3  -3   5   18.05    0.96
   3   3   5   17.19    0.83
  -3   3  -5   16.27    0.91
  -3   3  -5   15.89    0.92
   3   3   5   16.46    0.80
   3   3   5   16.39    1.08
   3   3   5   17.01    0.91
  -5  -3  -5   24.75    1.08
   5  -3   5   23.91    1.21
   5  -3   5   24.71    1.32
  -5  -3  -5   24.35    1.13
  -5  -3  -5   26.12    1.16
   5  -3   5   24.10    1.13
   5   3   5   24.16    1.16
   5   3   5   24.70    1.16
  -5   3  -5   23.57    1.21
  -5   3  -5   24.98    1.21
   5   3   5   25.37    1.05
   5   3   5   25.16    1.41
   5   3   5   22.50    1.03
  -7  -3  -5   -0.08    0.24
   7  -3   5    0.05    0.28
   7  -3   5   -0.06    0.25
  -7  -3  -5    0.20    0.28
   7  -3   5    0.06    0.32
  -7  -3  -5    0.20    0.25
   7   3   5   -0.17    0.22
   7   3   5    0.20    0.38
   7   3   5   -0.04    0.26
  -7   3  -5    0.01    0.27
  -7   3  -5    0.02    0.33
  -9  -3  -5   15.78    0.92
   9  -3   5   15.92    1.01
  -9  -3  -5   14.41    0.87
  -9   3  -5   16.85    1.00
   9   3   5   15.94    0.89
   9   3   5   15.02    0.88
  -9   3  -5   14.33    1.00
 -11  -3  -5    0.80    0.40
  11   3   5    0.34    0.32
  11   3   5   -0.07    0.28
 -11   3  -5    0.14    0.40
 -13  -3  -5    0.13    0.41
 -13   3  -5    0.54    0.48
  13   3   5    0.19    0.31
  13   3   5    0.25    0.32
 -15  -3  -5    1.56    0.51
  15   3   5    2.03    0.38
 -15   3  -5    1.09    0.58
 -17  -3  -5   -0.14    0.47
 -17   3  -5   -0.56    0.52
 -24   4   5    0.40    0.62
 -22   4   5    0.45    0.53
 -20  -4   5    0.32    0.28
  20  -4  -5    0.22    0.38
 -20   4   5   -0.77    0.46
  18  -4  -5    0.26    0.38
 -18  -4   5    0.48    0.28
 -18  -4   5    0.52    0.36
 -18   4   5    0.18    0.43
 -16  -4   5    2.38    0.36
  16  -4  -5    2.17    0.48
 -16  -4   5    2.37    0.46
  16  -4  -5    2.79    0.50
 -16   4   5    1.84    0.51
 -14  -4   5    2.01    0.33
 -14  -4   5    2.74    0.32
 -14  -4   5    1.98    0.39
  14  -4  -5    2.40    0.45
  14  -4  -5    2.31    0.48
 -14  -4   5    2.15    0.33
 -14   4   5    2.44    0.47
  14   4  -5    1.55    0.27
 -14   4   5    2.72    0.50
 -12  -4   5    3.19    0.36
  12  -4  -5    2.07    0.44
 -12  -4   5    2.42    0.41
  12  -4  -5    3.38    0.48
 -12  -4   5    2.27    0.36
  12  -4  -5    3.28    0.45
 -12  -4   5    2.88    0.35
 -12   4   5    2.77    0.49
  12   4  -5    3.08    0.36
  12   4  -5    2.94    0.43
 -12   4   5    3.49    0.50
  10  -4  -5    1.48    0.38
 -10  -4   5    1.61    0.31
 -10  -4   5    1.41    0.29
 -10  -4   5    1.27    0.33
  10  -4  -5    1.21    0.33
 -10  -4   5    2.27    0.35
 -10  -4   5    1.38    0.29
 -10   4   5    1.34    0.36
 -10   4   5    1.81    0.38
  10   4  -5    2.13    0.37
  10   4  -5    1.84    0.25
  10   4  -5    1.48    0.29
   8  -4  -5   40.53    1.72
  -8  -4   5   37.91    1.51
   8  -4  -5   41.05    1.70
  -8  -4   5   39.86    1.57
  -8  -4   5   43.09    1.61
   8  -4  -5   42.37    1.64
  -8  -4   5   41.56    1.54
  -8   4   5   38.19    1.69
  -8   4   5   42.97    1.73
   8   4  -5   38.12    1.58
   8   4  -5   41.64    1.68
  -8   4   5   39.34    1.62
  -6  -4   5    1.67    0.30
   6  -4  -5    1.64    0.35
  -6  -4   5    1.10    0.29
   6  -4  -5    1.62    0.35
   6  -4  -5    1.30    0.33
  -6  -4   5    1.34    0.35
  -6  -4   5    1.65    0.30
  -6   4   5    1.26    0.32
  -6   4   5    1.56    0.35
   6   4  -5    1.82    0.33
   6   4  -5    1.71    0.35
  -6   4   5    1.35    0.36
   6   4  -5    1.86    0.32
  -4  -4   5   34.61    1.43
   4  -4  -5   33.37    1.40
  -4  -4   5   33.81    1.39
   4  -4  -5   36.84    1.49
   4  -4  -5   33.69    1.45
  -4  -4   5   32.27    1.35
  -4   4   5   32.64    1.46
  -4   4   5   33.11    1.39
   4   4  -5   33.32    1.42
  -4   4   5   34.04    1.39
  -4   4   5   34.15    1.45
   4   4  -5   30.77    1.34
   2  -4  -5    3.70    0.45
  -2  -4   5    2.95    0.41
  -2  -4   5    3.42    0.46
  -2  -4   5    4.77    0.51
   2  -4  -5    3.07    0.43
   2  -4  -5    4.41    0.48
  -2   4   5    4.38    0.47
  -2   4   5    3.87    0.45
  -2   4   5    4.57    0.50
  -2   4   5    4.66    0.51
   2   4  -5    3.90    0.46
   2   4  -5    4.88    0.52
   0  -4   5   32.16    1.37
   0  -4  -5   32.70    1.36
   0  -4  -5   31.63    1.40
   0  -4  -5   33.33    1.42
   0  -4   5   34.50    1.47
   0   4   5   33.81    1.36
   0   4   5   32.08    1.41
   0   4  -5   34.63    1.47
   0   4   5   31.43    1.43
   0   4  -5   33.28    1.42
   0   4   5   33.56    1.32
  -2  -4  -5    0.06    0.21
  -2  -4  -5    0.46    0.25
   2  -4   5    0.63    0.30
  -2  -4  -5    0.58    0.27
   2  -4   5    0.54    0.31
   2  -4   5    0.62    0.29
   2   4   5   -0.07    0.31
   2   4   5    0.51    0.24
   2   4   5    0.19    0.22
  -2   4  -5    0.61    0.32
   2   4   5    0.25    0.24
  -2   4  -5    0.56    0.28
   2   4   5    0.17    0.24
   4  -4   5   34.12    1.63
   4  -4   5   38.02    1.64
  -4  -4  -5   36.86    1.48
   4  -4   5   34.42    1.48
  -4  -4  -5   38.29    1.53
  -4  -4  -5   38.27    1.55
   4   4   5   35.87    1.52
   4   4   5   35.46    1.36
   4   4   5   35.48    1.54
  -4   4  -5   34.52    1.57
  -4   4  -5   36.85    1.61
   4   4   5   33.76    1.74
   6  -4   5   10.62    0.94
  -6  -4  -5   11.81    0.74
   6  -4   5   11.80    0.78
  -6  -4  -5   10.29    0.70
   6  -4   5   11.41    0.84
  -6  -4  -5   11.24    0.74
   6   4   5   10.55    0.73
  -6   4  -5   10.82    0.79
   6   4   5   10.10    1.02
  -6   4  -5    9.93    0.87
   6   4   5   11.72    0.77
   8  -4   5    4.18    0.53
  -8  -4  -5    3.56    0.48
   8  -4   5    4.88    0.63
  -8  -4  -5    4.03    0.53
   8   4   5    4.09    0.51
  -8   4  -5    3.60    0.60
   8   4   5    3.85    0.50
  -8   4  -5    5.16    0.62
 -10  -4  -5    1.38    0.41
 -10  -4  -5    1.34    0.37
 -10   4  -5    1.18    0.49
  10   4   5    1.37    0.37
  10   4   5    1.09    0.36
 -12  -4  -5    0.72    0.44
  12   4   5    0.32    0.31
 -12   4  -5    0.35    0.51
  12   4   5    0.79    0.34
 -14  -4  -5   -0.07    0.40
  14   4   5    0.21    0.30
 -14   4  -5    0.24    0.49
 -16  -4  -5    0.32    0.48
 -16   4  -5   -0.01    0.54
 -18  -4  -5    0.44    0.51
 -18   4  -5   -0.69    0.61
 -23   5   5   -0.38    0.61
 -21   5   5    1.37    0.61
 -19  -5   5    0.46    0.29
  19  -5  -5    0.07    0.39
 -19   5   5   -0.08    0.50
  17  -5  -5    0.13    0.36
 -17  -5   5    0.02    0.32
 -17  -5   5    0.31    0.28
 -17   5   5    0.38    0.46
 -15  -5   5    4.13    0.50
  15  -5  -5    4.31    0.59
  15  -5  -5    3.70    0.32
  15  -5  -5    3.92    0.62
 -15  -5   5    4.59    0.45
  15   5  -5    4.13    0.34
  15   5  -5    4.02    0.32
 -15   5   5    4.13    0.64
  13  -5  -5    3.57    0.50
 -13  -5   5    2.73    0.35
  13  -5  -5    3.56    0.54
  13  -5  -5    3.09    0.55
 -13  -5   5    3.67    0.42
 -13  -5   5    3.31    0.41
 -13  -5   5    3.83    0.48
 -13   5   5    3.60    0.55
  13   5  -5    3.26    0.37
 -13   5   5    3.79    0.60
  11  -5  -5    8.56    0.74
 -11  -5   5   10.33    0.65
  11  -5  -5   10.76    0.89
 -11  -5   5   10.52    0.64
 -11  -5   5    9.71    0.62
 -11  -5   5    8.91    0.60
 -11   5   5    7.91    0.76
  11   5  -5    8.82    0.60
  11   5  -5    9.76    0.74
 -11   5   5   10.23    0.75
  -9  -5   5    1.07    0.28
  -9  -5   5    0.73    0.28
  -9  -5   5    0.43    0.23
   9  -5  -5    0.77    0.31
   9  -5  -5    1.07    0.39
   9  -5  -5    0.82    0.33
  -9  -5   5    0.80    0.31
  -9   5   5    0.54    0.30
   9   5  -5    0.39    0.22
   9   5  -5    0.72    0.29
  -9   5   5    1.07    0.36
   9   5  -5    0.63    0.26
  -9   5   5    0.86    0.32
   7  -5  -5   90.53    3.15
  -7  -5   5   89.33    3.06
  -7  -5   5   92.42    3.18
   7  -5  -5   89.64    3.29
  -7  -5   5   89.03    3.04
   7  -5  -5   91.05    3.30
  -7  -5   5   93.93    3.06
   7   5  -5   91.08    3.00
  -7   5   5   88.46    3.30
  -7   5   5   89.74    3.15
   7   5  -5   88.17    3.28
   7   5  -5   86.24    3.16
  -7   5   5   93.30    3.31
  -5  -5   5   26.84    1.15
   5  -5  -5   23.98    1.22
  -5  -5   5   26.79    1.17
  -5  -5   5   23.74    1.18
   5  -5  -5   26.66    1.21
   5  -5  -5   23.93    1.22
  -5   5   5   25.28    1.25
   5   5  -5   28.02    1.27
   5   5  -5   25.48    1.18
   5   5  -5   26.06    1.13
  -5   5   5   25.18    1.26
   3  -5  -5   24.17    1.20
  -3  -5   5   25.34    1.15
  -3  -5   5   24.03    1.15
  -3  -5   5   25.91    1.21
   3  -5  -5   25.88    1.20
   3  -5  -5   24.40    1.21
  -3   5   5   26.22    1.23
  -3   5   5   24.71    1.23
   3   5  -5   27.17    1.25
   3   5  -5   26.24    1.16
   3   5  -5   24.33    1.20
   1  -5  -5    0.19    0.25
   1  -5  -5    0.56    0.27
   1  -5  -5    0.58    0.30
  -1  -5   5    0.45    0.28
  -1  -5   5    0.53    0.27
  -1   5   5    0.74    0.28
  -1   5   5    0.36    0.27
   1   5  -5    0.46    0.27
   1   5  -5    0.12    0.26
  -1   5   5    0.16    0.29
  -1  -5  -5   13.94    0.83
   1  -5   5   15.08    0.84
  -1  -5  -5   15.79    0.86
   1  -5   5   14.92    0.90
  -1  -5  -5   13.83    0.85
   1   5   5   14.19    0.75
   1   5   5   12.95    0.84
   1   5   5   14.45    0.99
   1   5   5   14.63    0.86
  -1   5  -5   14.81    0.91
  -1   5  -5   15.68    0.92
   3  -5   5    0.45    0.30
  -3  -5  -5    0.92    0.32
   3  -5   5    0.99    0.34
  -3  -5  -5    1.09    0.31
  -3  -5  -5    0.85    0.30
   3  -5   5    0.64    0.31
   3   5   5    1.11    0.43
  -3   5  -5    1.22    0.36
  -3   5  -5    1.21    0.39
   3   5   5    0.45    0.26
   3   5   5    0.67    0.26
   3   5   5    1.62    0.37
   3   5   5    0.51    0.27
  -5  -5  -5   46.65    1.75
  -5  -5  -5   45.58    1.81
  -5  -5  -5   44.25    1.75
   5  -5   5   41.86    1.76
   5  -5   5   42.13    1.91
   5  -5   5   42.72    1.91
   5   5   5   45.24    2.11
  -5   5  -5   46.17    1.91
  -5   5  -5   42.11    1.90
   5   5   5   45.00    1.81
   5   5   5   45.56    1.67
   5   5   5   43.21    1.59
   5   5   5   43.97    1.81
   7  -5   5    9.06    0.87
  -7  -5  -5    9.80    0.74
  -7  -5  -5    9.39    0.75
  -7  -5  -5    9.69    0.72
   7  -5   5    9.55    0.78
  -7   5  -5    8.81    0.89
  -7   5  -5   10.06    0.90
   7   5   5    8.52    0.73
   7   5   5   10.19    0.74
   7   5   5    9.17    0.59
  -9  -5  -5    1.12    0.39
  -9  -5  -5    0.37    0.29
   9  -5   5    0.48    0.39
   9   5   5    0.08    0.29
  -9   5  -5    0.10    0.44
   9   5   5   -0.04    0.28
  -9   5  -5    0.42    0.36
 -11  -5  -5    1.58    0.43
  11   5   5    1.25    0.37
  11   5   5    0.28    0.31
 -11   5  -5    0.51    0.39
 -11   5  -5    0.65    0.49
 -13  -5  -5    4.50    0.64
  13   5   5    4.19    0.51
  13   5   5    4.37    0.51
 -13   5  -5    4.61    0.80
 -15  -5  -5    0.37    0.46
  15   5   5   -0.02    0.25
 -15   5  -5    0.06    0.53
 -17  -5  -5   -0.51    0.45
 -17   5  -5    0.57    0.69
 -22   6   5    0.02    0.59
 -20  -6   5   -0.32    0.26
 -20   6   5    0.31    0.56
 -18  -6   5   -0.04    0.29
  18  -6  -5   -0.21    0.39
 -18   6   5    0.40    0.52
  16  -6  -5    1.54    0.51
 -16  -6   5    1.87    0.36
 -16  -6   5    3.03    0.46
 -16   6   5    1.98    0.58
  14  -6  -5    1.32    0.42
 -14  -6   5    1.94    0.30
 -14  -6   5    1.50    0.35
 -14  -6   5    1.68    0.38
  14  -6  -5    1.81    0.51
  14   6  -5    1.65    0.28
  14   6  -5    1.19    0.28
 -14   6   5    1.03    0.47
 -14   6   5    1.53    0.45
  12  -6  -5    1.91    0.44
 -12  -6   5    1.62    0.30
  12  -6  -5    1.67    0.47
 -12  -6   5    1.40    0.35
 -12  -6   5    0.66    0.32
 -12  -6   5    0.98    0.29
  12   6  -5    0.91    0.27
  12   6  -5    1.25    0.31
 -12   6   5    1.09    0.39
 -12   6   5    2.21    0.48
 -10  -6   5    0.02    0.26
  10  -6  -5   -0.04    0.26
 -10  -6   5   -0.37    0.23
  10  -6  -5    0.34    0.33
  10  -6  -5    0.36    0.32
 -10  -6   5    0.11    0.26
 -10   6   5    0.36    0.34
  10   6  -5    0.35    0.19
  10   6  -5    0.01    0.28
 -10   6   5    0.09    0.33
  10   6  -5    0.24    0.23
 -10   6   5    0.26    0.31
  -8  -6   5   26.58    1.22
   8  -6  -5   30.40    1.36
  -8  -6   5   27.33    1.24
  -8  -6   5   29.73    1.27
   8  -6  -5   26.14    1.38
   8  -6  -5   31.43    1.47
  -8  -6   5   28.67    1.28
  -8   6   5   29.55    1.38
   8   6  -5   27.90    1.39
  -8   6   5   27.08    1.39
   8   6  -5   30.50    1.18
   8   6  -5   28.53    1.28
  -8   6   5   28.20    1.40
   6  -6  -5   38.79    1.75
   6  -6  -5   40.94    1.78
   6  -6  -5   39.64    1.69
  -6  -6   5   40.15    1.61
  -6  -6   5   37.65    1.60
  -6  -6   5   42.09    1.68
   6   6  -5   41.32    1.78
   6   6  -5   42.88    1.60
  -6   6   5   43.33    1.80
  -6   6   5   36.61    1.67
  -6   6   5   38.64    1.76
   6   6  -5   41.02    1.68
  -4  -6   5    2.83    0.43
  -4  -6   5    2.49    0.42
   4  -6  -5    2.28    0.44
   4  -6  -5    2.93    0.45
   4  -6  -5    4.03    0.53
   4   6  -5    2.90    0.45
  -4   6   5    1.95    0.42
  -4   6   5    2.79    0.47
   4   6  -5    3.06    0.47
   4   6  -5    2.74    0.43
  -4   6   5    2.17    0.43
  -2  -6   5   17.89    0.94
   2  -6  -5   19.08    1.00
  -2  -6   5   17.54    1.00
   2  -6  -5   16.66    0.93
   2  -6  -5   18.09    1.00
   2   6  -5   15.38    0.91
   2   6  -5   16.05    0.99
  -2   6   5   18.54    1.01
  -2   6   5   17.97    1.01
  -2   6   5   16.92    0.96
   2   6  -5   16.03    0.98
   0  -6  -5   10.56    0.75
   0  -6   5    9.77    0.77
   0  -6   5   10.20    0.76
   0  -6  -5    9.54    0.71
   0  -6  -5    9.76    0.72
   0   6  -5    9.68    0.82
   0   6   5    9.20    0.82
   0   6   5    8.85    0.76
   0   6   5   10.17    0.72
   0   6  -5   10.76    0.78
   0   6   5   10.28    0.66
   0   6   5   10.63    0.76
   0   6  -5    9.30    0.80
   2  -6   5    8.19    0.73
  -2  -6  -5    8.57    0.71
   2  -6   5    7.91    0.68
   2  -6   5    9.71    0.83
  -2  -6  -5    8.09    0.70
  -2  -6  -5    9.13    0.76
   2   6   5    9.05    0.86
   2   6   5    6.31    0.64
   2   6   5    7.63    0.55
  -2   6  -5    8.90    0.81
  -2   6  -5    8.16    0.78
  -2   6  -5   10.78    0.88
   2   6   5    6.22    0.66
   2   6   5    8.10    0.67
   4  -6   5   19.69    1.05
  -4  -6  -5   20.34    1.05
  -4  -6  -5   19.57    1.03
   4  -6   5   19.29    1.05
   4  -6   5   19.03    1.14
   4   6   5   20.51    1.08
   4   6   5   19.57    0.86
   4   6   5   17.82    1.02
   4   6   5   19.33    1.22
  -4   6  -5   18.61    1.15
  -4   6  -5   19.24    1.13
   4   6   5   19.34    0.97
  -4   6  -5   19.09    1.12
  -6  -6  -5   17.69    0.97
   6  -6   5   16.68    1.03
   6  -6   5   19.73    1.16
  -6  -6  -5   17.55    1.01
  -6  -6  -5   19.08    1.02
   6   6   5   18.95    0.89
  -6   6  -5   17.76    1.12
   6   6   5   18.11    1.25
  -6   6  -5   20.87    1.14
   6   6   5   18.87    0.82
   6   6   5   19.06    1.05
   6   6   5   19.01    1.03
  -6   6  -5   16.74    1.11
   8  -6   5    0.71    0.41
  -8  -6  -5   -0.40    0.24
  -8  -6  -5   -0.12    0.33
   8  -6   5   -0.14    0.32
  -8   6  -5    0.19    0.43
   8   6   5    0.21    0.32
  -8   6  -5   -0.09    0.31
  -8   6  -5   -0.48    0.28
   8   6   5    0.08    0.29
 -10  -6  -5    0.03    0.35
 -10   6  -5   -0.42    0.45
 -10   6  -5    0.53    0.40
  10   6   5   -0.30    0.28
  10   6   5    0.04    0.30
 -12  -6  -5    3.73    0.58
 -12   6  -5    4.29    0.78
  12   6   5    3.58    0.49
  12   6   5    3.69    0.50
 -14  -6  -5    0.73    0.47
 -14   6  -5    1.34    0.66
  14   6   5    0.67    0.31
 -16  -6  -5   -0.47    0.43
 -16   6  -5    1.15    0.70
 -18  -6  -5    0.19    0.49
 -18   6  -5    0.48    0.69
 -23   7   5    1.08    0.70
 -21   7   5    0.29    0.63
 -19  -7   5    0.62    0.32
 -19   7   5   -0.21    0.56
  17  -7  -5    0.70    0.50
 -17  -7   5    0.43    0.31
 -17   7   5    1.30    0.57
  15  -7  -5    3.74    0.67
 -15  -7   5    3.00    0.43
 -15  -7   5    4.02    0.48
  15   7  -5    2.68    0.36
  15   7  -5    2.89    0.33
 -15   7   5    3.79    0.71
  13  -7  -5    0.09    0.42
 -13  -7   5    0.05    0.24
  13  -7  -5   -0.06    0.36
 -13  -7   5   -0.09    0.29
 -13  -7   5   -0.35    0.26
  13  -7  -5    0.00    0.16
  13   7  -5    0.07    0.23
 -13   7   5    0.33    0.37
 -13   7   5   -0.37    0.40
  13   7  -5    0.22    0.27
  11  -7  -5    3.43    0.58
  11  -7  -5    3.88    0.58
 -11  -7   5    3.04    0.44
 -11  -7   5    3.44    0.45
  11  -7  -5    2.94    0.59
 -11  -7   5    3.67    0.49
 -11   7   5    2.80    0.56
  11   7  -5    2.63    0.43
  11   7  -5    3.21    0.44
 -11   7   5    3.14    0.58
  -9  -7   5    0.17    0.31
   9  -7  -5    0.35    0.36
   9  -7  -5    0.34    0.33
  -9  -7   5    0.34    0.27
  -9  -7   5    0.47    0.31
   9  -7  -5    0.18    0.35
   9   7  -5    0.58    0.35
  -9   7   5   -0.14    0.36
   9   7  -5    0.81    0.31
   9   7  -5    0.42    0.27
  -9   7   5    0.50    0.36
   9   7  -5    0.20    0.22
  -9   7   5    0.33    0.32
  -7  -7   5   10.62    0.73
  -7  -7   5    8.60    0.75
   7  -7  -5   10.28    0.90
   7  -7  -5   10.37    0.91
   7  -7  -5    9.01    0.81
   7   7  -5   10.00    0.74
   7   7  -5   11.58    0.72
  -7   7   5    9.91    0.88
   7   7  -5   11.02    0.93
  -7   7   5   10.66    0.91
  -7   7   5   11.00    0.92
  -5  -7   5    0.00    0.24
   5  -7  -5   -0.08    0.30
  -5  -7   5    0.28    0.28
   5  -7  -5   -0.24    0.27
   5  -7  -5    0.28    0.30
  -5   7   5    0.11    0.32
  -5   7   5    0.35    0.32
   5   7  -5    0.28    0.29
   5   7  -5   -0.11    0.25
  -5   7   5    0.41    0.34
   5   7  -5    0.19    0.27
   3  -7  -5   10.32    0.89
  -3  -7   5   11.08    0.81
   3  -7  -5   12.49    0.88
  -3  -7   5   12.22    0.83
   3  -7  -5   12.54    0.83
  -3   7   5   12.41    0.86
   3   7  -5   12.92    0.86
   3   7  -5   13.47    0.86
  -3   7   5   13.05    0.89
   3   7  -5   12.53    0.86
  -3   7   5   13.00    0.88
  -1  -7   5   -0.06    0.27
   1  -7  -5   -0.05    0.25
   1  -7  -5    0.20    0.27
   1  -7  -5   -0.23    0.26
  -1  -7   5    0.32    0.34
  -1   7   5    0.56    0.34
   1   7  -5    0.13    0.29
  -1   7   5    0.00    0.28
  -1   7   5   -0.02    0.27
  -1   7   5   -0.09    0.28
   1   7  -5    0.45    0.35
   1   7  -5    0.07    0.31
   1  -7   5    7.21    0.76
   1  -7   5    8.05    0.66
  -1  -7  -5    8.74    0.76
  -1  -7  -5    7.39    0.71
  -1  -7  -5    9.74    0.80
   1  -7   5    8.73    0.79
  -1   7  -5   10.15    0.88
   1   7   5    9.76    0.87
   1   7   5    7.90    0.77
  -1   7  -5   10.00    0.89
  -1   7  -5   10.00    0.88
   1   7   5    8.69    0.74
   1   7   5    8.52    0.61
   1   7   5    8.47    0.79
  -3  -7  -5    1.52    0.39
   3  -7   5    1.92    0.40
   3  -7   5    3.52    0.54
   3  -7   5    2.06    0.47
  -3  -7  -5    2.14    0.44
   3   7   5    1.97    0.50
   3   7   5    2.09    0.39
   3   7   5    2.09    0.42
   3   7   5    2.18    0.35
   3   7   5    1.89    0.45
  -3   7  -5    1.41    0.45
  -3   7  -5    1.17    0.42
  -3   7  -5    2.88    0.56
  -3   7  -5    1.46    0.43
  -5  -7  -5    5.79    0.65
   5  -7   5    6.65    0.65
   5  -7   5    7.20    0.82
  -5  -7  -5    7.57    0.71
   5  -7   5    9.23    0.82
   5   7   5    6.70    0.67
  -5   7  -5    7.03    0.75
  -5   7  -5    6.96    0.80
   5   7   5    4.82    0.74
   5   7   5    6.95    0.49
  -5   7  -5    6.82    0.79
   5   7   5    7.77    0.65
   5   7   5    7.83    0.72
  -5   7  -5    6.38    0.77
   7  -7   5    0.25    0.40
  -7  -7  -5    0.19    0.35
   7  -7   5    0.11    0.36
  -7  -7  -5    0.15    0.28
  -7   7  -5    0.69    0.39
   7   7   5    0.39    0.34
  -7   7  -5    0.53    0.41
   7   7   5    0.33    0.34
  -7   7  -5   -0.20    0.42
  -9  -7  -5    2.06    0.50
  -9   7  -5    1.77    0.50
   9   7   5    2.85    0.49
   9   7   5    2.86    0.48
  -9   7  -5    1.44    0.58
 -11  -7  -5    0.61    0.45
 -11   7  -5    0.67    0.55
  11   7   5    0.91    0.38
 -13  -7  -5    0.20    0.42
  13   7   5    0.69    0.35
 -13   7  -5   -0.68    0.55
 -15  -7  -5   -0.17    0.44
 -15   7  -5    1.85    0.72
 -17  -7  -5    0.28    0.51
 -17   7  -5    0.64    0.75
 -22   8   5    0.76    0.73
 -20  -8   5    1.49    0.35
 -20   8   5    0.31    0.67
 -18  -8   5   -0.07    0.33
  18  -8  -5    0.24    0.51
 -18   8   5   -0.03    0.57
  16  -8  -5    1.64    0.60
 -16  -8   5    1.86    0.43
 -16   8   5    0.54    0.59
  16   8  -5    1.46    0.26
  14  -8  -5    1.43    0.56
 -14  -8   5    1.37    0.33
 -14  -8   5    1.56    0.42
  14  -8  -5    0.60    0.33
 -14   8   5    1.30    0.57
  14   8  -5    1.10    0.34
  14   8  -5    1.31    0.33
 -12  -8   5    8.77    0.75
  12  -8  -5    8.28    0.89
  12  -8  -5    9.43    0.98
 -12   8   5   10.72    1.02
  12   8  -5   10.91    0.74
  12   8  -5    9.87    0.68
 -12   8   5    9.35    0.97
  10  -8  -5    6.63    0.79
 -10  -8   5    4.85    0.57
  10  -8  -5    6.11    0.74
  10  -8  -5    5.69    0.74
 -10   8   5    6.40    0.77
  10   8  -5    5.12    0.59
  10   8  -5    4.62    0.55
 -10   8   5    5.35    0.73
   8  -8  -5   -0.01    0.37
  -8  -8   5    0.27    0.35
   8  -8  -5   -0.05    0.35
   8  -8  -5    0.00    0.30
   8   8  -5   -0.28    0.29
  -8   8   5   -0.02    0.33
  -8   8   5   -0.06    0.34
   8   8  -5    0.39    0.28
   8   8  -5    0.06    0.29
   8   8  -5    0.42    0.29
  -8   8   5   -0.63    0.34
  -6  -8   5    0.19    0.32
   6  -8  -5    0.53    0.34
   6  -8  -5   -0.14    0.30
   6  -8  -5   -0.01    0.33
  -6   8   5    0.89    0.41
   6   8  -5   -0.08    0.29
   6   8  -5    0.00    0.12
   6   8  -5    0.16    0.31
  -6   8   5   -0.18    0.30
  -6   8   5   -0.02    0.32
   6   8  -5    0.08    0.30
   4  -8  -5    9.52    0.85
   4  -8  -5    7.21    0.78
  -4  -8   5    9.13    0.81
   4  -8  -5    7.36    0.77
  -4  -8   5    7.50    0.73
   4   8  -5    8.49    0.76
   4   8  -5    8.62    0.84
  -4   8   5    7.21    0.76
   4   8  -5    8.77    0.81
   4   8  -5    7.06    0.74
  -4   8   5    9.83    0.89
  -4   8   5    8.03    0.81
  -2  -8   5    1.24    0.41
   2  -8  -5    1.19    0.40
  -2  -8   5    1.05    0.41
   2  -8  -5    1.80    0.42
   2  -8  -5    0.52    0.35
   2   8  -5    0.95    0.38
  -2   8   5    1.79    0.43
   2   8  -5    0.40    0.34
  -2   8   5    1.80    0.44
   2   8  -5    0.92    0.40
   2   8  -5    1.06    0.41
  -2   8   5    1.13    0.40
  -2   8   5    0.89    0.39
   0  -8  -5    1.87    0.45
   0  -8   5    1.67    0.45
   0  -8   5    2.24    0.47
   0  -8  -5    2.68    0.49
   0  -8  -5    1.80    0.41
   0   8   5    2.06    0.42
   0   8  -5    1.57    0.46
   0   8  -5    2.69    0.53
   0   8  -5    0.30    0.36
   0   8   5    1.84    0.44
   0   8  -5    2.23    0.48
   0   8   5    2.49    0.48
   0   8   5    2.02    0.48
   0   8   5    1.52    0.44
  -2  -8  -5    0.32    0.30
   2  -8   5    0.87    0.38
   2  -8   5    0.06    0.36
   2  -8   5    0.49    0.27
  -2  -8  -5    0.49    0.36
   2   8   5    0.14    0.30
   2   8   5    0.17    0.31
  -2   8  -5    0.18    0.31
  -2   8  -5    1.04    0.42
   2   8   5    0.13    0.25
  -2   8  -5   -0.27    0.33
  -2   8  -5    1.59    0.48
   2   8   5    0.59    0.35
   2   8   5    0.20    0.33
   4  -8   5   -0.34    0.36
  -4  -8  -5   -0.23    0.34
   4  -8   5   -0.05    0.24
   4  -8   5    0.30    0.36
  -4  -8  -5    0.30    0.31
   4   8   5   -0.04    0.24
   4   8   5    0.05    0.30
  -4   8  -5    0.25    0.38
  -4   8  -5    0.28    0.45
   4   8   5    0.38    0.33
   4   8   5   -0.80    0.25
   4   8   5    0.00    0.35
  -4   8  -5    0.31    0.35
  -4   8  -5    0.24    0.34
   6  -8   5    3.97    0.65
   6  -8   5    3.93    0.70
  -6  -8  -5    4.53    0.62
  -6  -8  -5    3.52    0.54
   6   8   5    3.25    0.54
   6   8   5    4.53    0.59
  -6   8  -5    3.38    0.72
  -6   8  -5    3.38    0.63
   6   8   5    3.89    0.39
  -8  -8  -5    1.81    0.47
   8  -8   5    1.74    0.51
   8   8   5    1.18    0.42
   8   8   5    1.62    0.44
  -8   8  -5    1.29    0.61
 -10  -8  -5    0.88    0.46
  10   8   5    1.12    0.41
 -10   8  -5    1.05    0.60
 -12  -8  -5    1.13    0.51
 -12   8  -5    0.76    0.62
  12   8   5    1.31    0.40
 -14  -8  -5    0.05    0.48
 -14   8  -5   -0.04    0.68
 -16  -8  -5   -0.02    0.51
 -16   8  -5   -0.67    0.68
 -21   9   5   -0.09    0.69
 -19  -9   5    0.59    0.37
 -19   9   5   -0.17    0.57
  17  -9  -5    0.69    0.53
 -17  -9   5    0.28    0.38
 -17   9   5    0.17    0.55
  15  -9  -5    3.21    0.73
 -15  -9   5    2.08    0.47
 -15   9   5    1.94    0.66
  15   9  -5    2.70    0.38
  15   9  -5    2.07    0.39
  13  -9  -5    1.65    0.59
  13  -9  -5    1.80    0.43
 -13  -9   5    1.71    0.47
  13   9  -5    1.50    0.37
  13   9  -5    0.93    0.36
 -13   9   5    1.45    0.59
 -11  -9   5    0.54    0.38
  11  -9  -5    0.44    0.46
  11  -9  -5    0.23    0.43
 -11   9   5    0.54    0.43
 -11   9   5    0.08    0.43
  11   9  -5    0.42    0.31
  11   9  -5    0.40    0.35
  -9  -9   5    4.49    0.61
   9  -9  -5    3.77    0.68
   9  -9  -5    1.75    0.51
   9  -9  -5    2.79    0.58
  -9   9   5    3.11    0.63
   9   9  -5    3.92    0.55
  -9   9   5    2.56    0.58
   9   9  -5    3.70    0.54
   7  -9  -5    9.93    0.96
   7  -9  -5    8.63    0.87
  -7  -9   5   10.63    0.87
   7  -9  -5   11.87    1.06
   7   9  -5    8.52    0.80
  -7   9   5    7.36    0.85
  -7   9   5   10.91    1.01
   7   9  -5    9.68    0.78
  -7   9   5    8.41    0.90
   7   9  -5    8.04    0.79
   5  -9  -5    0.19    0.33
   5  -9  -5    0.01    0.33
   5  -9  -5    0.62    0.40
  -5  -9   5    0.27    0.36
   5   9  -5    1.01    0.38
   5   9  -5    0.11    0.32
   5   9  -5    0.01    0.28
  -5   9   5    0.27    0.37
  -5   9   5    0.27    0.38
  -5   9   5    0.26    0.36
  -3  -9   5    0.65    0.35
   3  -9  -5    0.07    0.32
  -3  -9   5   -0.24    0.37
   3  -9  -5   -0.47    0.29
   3  -9  -5    0.52    0.37
  -3   9   5   -0.63    0.29
   3   9  -5   -0.28    0.28
   3   9  -5   -0.20    0.30
  -3   9   5   -0.11    0.35
   3   9  -5   -0.02    0.36
  -3   9   5   -0.14    0.34
   1  -9  -5    0.78    0.39
  -1  -9   5    1.27    0.43
   1  -9  -5    0.72    0.37
  -1  -9   5    0.58    0.42
   1  -9  -5    0.59    0.35
  -1   9   5    0.89    0.40
   1   9  -5    1.00    0.44
   1   9  -5    0.92    0.41
  -1   9   5    0.16    0.35
  -1   9   5    1.17    0.43
  -1   9   5    0.86    0.40
   1   9  -5    1.05    0.41
  -1  -9  -5    6.50    0.72
  -1  -9  -5    5.86    0.69
   1  -9   5    5.22    0.71
   1  -9   5    6.42    0.53
   1  -9   5    4.84    0.69
   1   9   5    5.73    0.68
   1   9   5    5.70    0.62
  -1   9  -5    5.73    0.76
   1   9   5    5.77    0.71
   1   9   5    4.71    0.65
   1   9   5    6.09    0.71
  -1   9  -5    5.96    0.76
  -1   9  -5    6.67    0.81
   3  -9   5    0.56    0.41
   3  -9   5    0.47    0.41
  -3  -9  -5    0.97    0.37
   3  -9   5    0.67    0.28
  -3  -9  -5    0.34    0.41
   3   9   5    0.35    0.30
   3   9   5    0.18    0.23
  -3   9  -5    0.44    0.49
   3   9   5    0.60    0.37
  -3   9  -5    0.44    0.43
   3   9   5    0.11    0.39
  -3   9  -5    0.41    0.40
   3   9   5    0.78    0.37
   5  -9   5    0.11    0.44
   5  -9   5    0.23    0.38
  -5  -9  -5    0.59    0.36
  -5  -9  -5    0.21    0.42
   5   9   5    0.48    0.37
   5   9   5    0.64    0.40
  -5   9  -5    0.03    0.45
  -5   9  -5    0.15    0.41
   5   9   5    0.48    0.27
   7  -9   5    4.18    0.71
  -7  -9  -5    4.79    0.67
  -7   9  -5    3.57    0.78
   7   9   5    5.06    0.66
  -9  -9  -5    2.64    0.58
   9   9   5    3.75    0.58
  -9   9  -5    2.50    0.73
 -11  -9  -5    0.07    0.42
  11   9   5    0.32    0.37
 -11   9  -5    0.48    0.65
 -13  -9  -5   -0.96    0.42
 -13   9  -5    0.93    0.73
 -15  -9  -5   -0.40    0.46
 -15   9  -5   -0.21    0.67
 -20 -10   5   -0.22    0.38
 -20  10   5    1.32    0.78
 -18 -10   5    0.65    0.42
 -18  10   5   -0.04    0.65
 -16 -10   5   -0.54    0.38
  16 -10  -5    0.47    0.54
 -16  10   5   -0.40    0.55
  16  10  -5   -0.20    0.25
  16  10  -5    0.27    0.31
  14 -10  -5    0.74    0.58
 -14 -10   5    0.72    0.45
 -14  10   5    0.74    0.58
  14  10  -5    0.96    0.36
  14  10  -5    0.41    0.36
  12 -10  -5    0.89    0.55
 -12 -10   5    0.42    0.40
  12 -10  -5    0.25    0.48
  12  10  -5   -0.03    0.34
 -12  10   5    0.82    0.56
  12  10  -5    0.42    0.34
 -10 -10   5   -0.51    0.38
  10 -10  -5   -0.57    0.37
  10 -10  -5    0.06    0.45
 -10  10   5    0.13    0.50
  10  10  -5    0.23    0.35
 -10  10   5    0.68    0.48
  10  10  -5   -0.10    0.37
   8 -10  -5    0.65    0.44
   8 -10  -5    0.98    0.47
  -8 -10   5   -0.21    0.36
   8 -10  -5    0.83    0.49
  -8  10   5    0.79    0.48
  -8  10   5    1.05    0.52
  -8  10   5    1.35    0.50
   8  10  -5    0.44    0.37
   8  10  -5    0.45    0.37
   6 -10  -5    0.19    0.42
  -6 -10   5    0.72    0.42
   6 -10  -5    1.17    0.50
   6 -10  -5    1.14    0.47
  -6  10   5   -0.21    0.36
  -6  10   5    0.43    0.47
  -6  10   5    0.62    0.43
   6  10  -5    1.16    0.44
   6  10  -5    0.67    0.43
   6  10  -5    0.68    0.37
   4 -10  -5    0.19    0.39
  -4 -10   5    0.22    0.40
   4 -10  -5    0.80    0.39
   4 -10  -5    0.01    0.42
  -4  10   5    0.72    0.43
  -4  10   5    0.25    0.40
   4  10  -5    0.07    0.36
   4  10  -5    0.88    0.39
  -4  10   5    0.45    0.42
   4  10  -5    0.34    0.39
   2 -10  -5   -0.31    0.28
   2 -10  -5   -0.49    0.36
  -2 -10   5    0.94    0.47
   2 -10  -5    0.04    0.36
  -2 -10   5   -0.04    0.36
  -2  10   5    0.05    0.35
  -2  10   5    0.32    0.40
   2  10  -5    0.81    0.43
  -2  10   5    0.21    0.37
   2  10  -5    0.43    0.38
  -2  10   5   -0.10    0.36
   2  10  -5    0.44    0.42
   0 -10   5    0.17    0.37
   0 -10   5    0.43    0.26
   0 -10  -5    0.69    0.44
   0 -10   5    0.07    0.42
   0 -10  -5    0.08    0.36
   0  10   5    0.05    0.36
   0  10   5    0.99    0.42
   0  10   5    0.04    0.40
   0  10  -5    0.72    0.41
   0  10  -5    0.58    0.41
   0  10  -5    0.11    0.39
   0  10   5   -0.51    0.35
   2 -10   5    0.31    0.39
  -2 -10  -5   -0.59    0.26
  -2 -10  -5    0.25    0.39
   2 -10   5    0.44    0.22
   2 -10   5    0.54    0.47
   2  10   5   -0.03    0.33
   2  10   5   -0.18    0.38
   2  10   5    0.38    0.39
  -2  10  -5    0.54    0.44
   2  10   5    0.23    0.32
  -2  10  -5   -0.08    0.48
  -2  10  -5   -0.20    0.36
   2  10   5    0.40    0.35
  -4 -10  -5    3.72    0.63
   4 -10   5    3.45    0.68
   4 -10   5    4.24    0.75
  -4  10  -5    3.06    0.67
   4  10   5    3.07    0.62
   4  10   5    2.94    0.43
  -4  10  -5    3.58    0.70
  -6 -10  -5    1.90    0.56
   6 -10   5    3.02    0.67
  -6  10  -5    2.46    0.71
   6  10   5    2.20    0.55
  -6  10  -5    2.35    0.64
   8 -10   5    0.20    0.49
  -8 -10  -5    0.38    0.46
  -8  10  -5   -0.02    0.57
   8  10   5    0.77    0.43
 -10 -10  -5   -0.17    0.47
  10  10   5    0.01    0.37
 -10  10  -5   -0.05    0.60
 -12 -10  -5   -0.35    0.42
 -12  10  -5    0.63    0.70
 -14 -10  -5    0.17    0.51
 -14  10  -5   -1.04    0.64
 -19 -11   5    1.21    0.45
 -19  11   5    0.00    0.74
 -17 -11   5   -0.32    0.40
 -17  11   5   -0.22    0.60
 -15 -11   5    0.38    0.46
  15 -11  -5    1.28    0.68
 -15  11   5    0.23    0.61
  15  11  -5    1.19    0.38
  13 -11  -5   -0.29    0.47
 -13 -11   5    0.30    0.44
  13 -11  -5    0.93    0.46
  13  11  -5    0.31    0.35
 -13  11   5    0.00    0.55
  11 -11  -5    2.63    0.69
  11 -11  -5    3.70    0.73
 -11 -11   5    2.58    0.58
 -11  11   5    4.25    0.78
  11  11  -5    3.34    0.58
  -9 -11   5    0.89    0.47
   9 -11  -5   -0.30    0.44
   9 -11  -5    0.00    0.46
  -9  11   5    0.08    0.47
  -9  11   5    0.34    0.49
   9  11  -5   -0.04    0.36
  -7 -11   5    3.18    0.62
   7 -11  -5    2.81    0.68
   7 -11  -5    4.00    0.73
   7 -11  -5    4.86    0.80
  -7  11   5    4.04    0.75
  -7  11   5    5.16    0.81
   7  11  -5    4.72    0.68
  -7  11   5    4.30    0.75
  -5 -11   5   -0.53    0.38
   5 -11  -5    0.04    0.40
   5 -11  -5   -0.08    0.40
   5 -11  -5   -0.36    0.44
  -5  11   5    0.07    0.41
  -5  11   5   -0.14    0.45
   5  11  -5   -0.07    0.37
   5  11  -5   -0.51    0.37
  -5  11   5   -0.54    0.38
   5  11  -5   -0.51    0.32
  -3 -11   5    0.62    0.44
   3 -11  -5    0.46    0.48
   3 -11  -5   -0.54    0.35
   3 -11  -5    0.31    0.40
  -3  11   5    0.04    0.39
   3  11  -5    0.56    0.43
   3  11  -5   -0.24    0.36
  -3  11   5   -0.11    0.45
   3  11  -5    0.49    0.44
  -3  11   5    0.57    0.36
  -3  11   5    0.32    0.44
   1 -11  -5    0.27    0.39
  -1 -11   5    0.27    0.43
   1 -11  -5    0.78    0.44
  -1  11   5    0.47    0.44
   1  11  -5    0.25    0.47
  -1  11   5   -0.38    0.39
   1  11  -5    0.06    0.38
  -1  11   5    0.92    0.42
  -1  11   5    0.74    0.47
   1  11  -5    0.81    0.48
  -1 -11  -5    0.83    0.48
  -1 -11  -5    1.84    0.51
   1 -11   5    0.99    0.55
   1 -11   5    1.06    0.26
   1 -11   5    2.12    0.56
  -1  11  -5    2.43    0.65
   1  11   5    0.81    0.44
  -1  11  -5    1.75    0.55
  -1  11  -5    1.77    0.55
   1  11   5    2.07    0.56
   1  11   5    0.09    0.44
   3 -11   5    1.65    0.56
  -3 -11  -5    1.99    0.55
   3 -11   5    2.22    0.65
  -3  11  -5    1.23    0.56
  -3  11  -5    2.54    0.67
  -3  11  -5    1.64    0.66
   3  11   5    1.48    0.40
   3  11   5    3.11    0.64
   5 -11   5    3.44    0.76
  -5 -11  -5    2.47    0.63
  -5  11  -5    3.20    0.76
  -5  11  -5    3.89    0.82
   5  11   5    3.43    0.65
   7 -11   5   -0.74    0.45
  -7 -11  -5   -0.46    0.43
  -7  11  -5   -0.16    0.58
   7  11   5   -0.22    0.38
  -9 -11  -5    0.68    0.55
  -9  11  -5    1.10    0.75
   9  11   5    1.18    0.47
 -11 -11  -5   -0.19    0.47
 -11  11  -5    0.21    0.69
 -13 -11  -5   -0.02    0.52
 -13  11  -5   -0.81    0.68
 -15 -11  -5    0.53    0.56
 -15  11  -5    0.24    0.76
 -18 -12   5    0.68    0.51
 -18  12   5    1.57    0.82
 -16 -12   5   -0.50    0.43
 -16  12   5   -0.27    0.67
  14 -12  -5    0.46    0.60
 -14 -12   5    1.04    0.52
  14  12  -5    0.09    0.37
 -14  12   5    1.85    0.74
  12 -12  -5    4.46    0.73
  12 -12  -5    3.48    0.84
 -12 -12   5    4.43    0.72
  12 -12  -5    6.48    0.94
 -12  12   5    5.33    0.94
  12  12  -5    5.11    0.67
  10 -12  -5   11.72    1.17
  10 -12  -5   14.38    1.36
 -10 -12   5   12.50    1.07
 -10  12   5   11.53    1.24
  10  12  -5   11.45    1.03
   8 -12  -5    2.48    0.67
  -8 -12   5    1.60    0.56
   8 -12  -5    0.86    0.58
  -8  12   5    1.87    0.64
   8  12  -5    1.25    0.51
  -8  12   5    0.32    0.58
   6 -12  -5   14.45    1.33
   6 -12  -5   16.15    1.38
  -6 -12   5   11.65    1.09
   6 -12  -5   12.47    1.19
  -6  12   5   12.02    1.18
  -6  12   5   13.06    1.26
   6  12  -5   14.83    1.23
  -6  12   5   14.63    1.35
  -4 -12   5    1.52    0.59
   4 -12  -5    2.02    0.63
   4 -12  -5    3.19    0.67
  -4  12   5    2.54    0.49
  -4  12   5    2.35    0.65
   4  12  -5    2.75    0.63
   4  12  -5    3.09    0.63
  -4  12   5    3.28    0.71
  -2 -12   5    2.91    0.68
   2 -12  -5    4.85    0.80
   2 -12  -5    3.96    0.75
   2  12  -5    3.74    0.76
  -2  12   5    3.59    0.74
   2  12  -5    4.97    0.78
  -2  12   5    3.85    0.73
  -2  12   5    4.27    0.59
   0 -12   5    4.42    0.79
   0 -12  -5    4.78    0.76
   0  12   5    5.54    0.70
   0  12   5    5.59    0.83
   0  12  -5    4.58    0.80
   0  12   5    5.66    0.76
   0  12  -5    5.34    0.84
   2 -12   5    4.92    0.84
  -2 -12  -5    2.86    0.65
   2  12   5    3.67    0.72
   2  12   5    4.67    0.63
  -2  12  -5    5.64    0.87
  -2  12  -5    4.69    0.81
   4 -12   5    2.33    0.69
  -4 -12  -5    2.10    0.62
  -4  12  -5    1.11    0.68
   4  12   5    3.07    0.67
  -4  12  -5    3.24    0.72
  -6 -12  -5    2.61    0.67
   6 -12   5    3.70    0.80
   6  12   5    1.06    0.54
  -6  12  -5    2.90    0.77
  -8 -12  -5    1.29    0.55
  -8  12  -5    0.90    0.74
   8  12   5    0.96    0.51
 -10 -12  -5    1.33    0.61
 -10  12  -5    2.25    0.87
 -12 -12  -5   -0.41    0.51
 -12  12  -5    0.54    0.78
 -14 -12  -5   -0.07    0.58
 -14  12  -5   -0.27    0.77
 -17 -13   5    1.31    0.57
 -17  13   5   -0.67    0.68
 -15 -13   5   -0.32    0.49
  15 -13  -5    0.56    0.63
 -15  13   5   -0.43    0.66
 -13 -13   5    0.39    0.52
  13 -13  -5    0.20    0.59
 -13  13   5    0.75    0.70
 -11 -13   5    3.24    0.70
  11 -13  -5    3.78    0.70
  11 -13  -5    4.34    0.88
  11 -13  -5    2.91    0.78
  11  13  -5    2.94    0.62
 -11  13   5    3.23    0.86
   9 -13  -5    0.12    0.54
  -9 -13   5    0.83    0.54
   9 -13  -5   -0.15    0.55
  -9  13   5    0.34    0.58
   9  13  -5    0.65    0.48
   7 -13  -5    3.25    0.77
  -7 -13   5    4.66    0.77
   7 -13  -5    3.60    0.80
  -7  13   5    4.53    0.81
  -7  13   5    3.95    0.80
   7  13  -5    2.90    0.67
  -5 -13   5    1.05    0.58
   5 -13  -5   -0.91    0.46
   5 -13  -5    0.03    0.51
   5  13  -5    0.64    0.49
  -5  13   5    1.15    0.57
  -5  13   5    0.10    0.34
  -5  13   5    0.99    0.58
   3 -13  -5    9.81    1.10
  -3 -13   5   11.05    1.12
  -3  13   5    9.92    1.08
  -3  13   5    8.30    1.07
  -3  13   5   12.26    0.86
   3  13  -5   11.47    1.19
   3  13  -5   10.46    1.08
  -1 -13   5    0.31    0.54
   1 -13  -5    0.01    0.52
  -1  13   5    0.27    0.38
   1  13  -5   -0.42    0.44
   1  13  -5    0.16    0.53
  -1  13   5    0.15    0.46
  -1  13   5    1.12    0.55
  -1 -13  -5   11.23    1.14
   1 -13   5   12.54    1.20
  -1  13  -5   12.34    1.28
   1  13   5   11.91    1.23
  -1  13  -5   15.68    1.44
  -3 -13  -5   -0.35    0.49
   3 -13   5   -0.39    0.46
   3  13   5    0.78    0.57
  -3  13  -5    0.39    0.55
  -3  13  -5    0.41    0.62
   5 -13   5    4.11    0.88
  -5 -13  -5    4.16    0.77
  -5  13  -5    4.53    0.93
   5  13   5    3.74    0.72
  -7 -13  -5   -0.70    0.47
   7 -13   5    0.08    0.64
  -7  13  -5    0.43    0.72
  -9 -13  -5    2.69    0.72
  -9  13  -5    3.20    0.89
 -11 -13  -5    0.45    0.56
 -11  13  -5    1.61    0.86
 -13 -13  -5    0.17    0.59
 -13  13  -5    0.93    0.87
 -16 -14   5    0.09    0.57
 -16  14   5    0.21    0.79
 -14 -14   5    0.25    0.57
  14 -14  -5   -1.04    0.54
 -14  14   5    0.71    0.79
 -12 -14   5    0.19    0.57
  12 -14  -5    1.04    0.69
 -12  14   5    1.31    0.80
  10 -14  -5    2.16    0.78
  10 -14  -5    2.16    0.84
 -10 -14   5    2.03    0.69
  10 -14  -5    2.09    0.65
  10  14  -5    2.20    0.62
 -10  14   5    2.29    0.81
   8 -14  -5    1.57    0.71
   8 -14  -5    1.98    0.70
  -8 -14   5    2.52    0.71
   8  14  -5    1.97    0.62
  -8  14   5    1.47    0.72
  -6 -14   5    5.98    0.88
   6 -14  -5    4.97    0.89
   6  14  -5    5.44    0.85
  -6  14   5    5.63    0.93
  -6  14   5    4.73    0.89
  -4 -14   5    3.91    0.78
   4 -14  -5    4.62    0.88
  -4  14   5    3.15    0.80
  -4  14   5    4.55    0.90
   4  14  -5    4.88    0.86
  -2 -14   5   12.30    1.24
   2 -14  -5   11.72    1.22
  -2  14   5   13.51    1.37
  -2  14   5   12.47    1.24
   2  14  -5   14.64    1.33
   2  14  -5   11.20    1.23
   0 -14   5    4.10    0.85
   0 -14  -5    3.86    0.83
   0  14   5    5.13    0.88
   0  14  -5    3.27    0.81
   0  14  -5    3.67    0.86
   2 -14   5    4.76    0.96
  -2 -14  -5    5.82    0.91
  -2  14  -5    8.14    1.12
   2  14   5    7.05    0.99
  -2  14  -5    5.79    1.01
  -4 -14  -5    1.85    0.68
   4 -14   5    2.16    0.77
   4  14   5    1.36    0.60
  -4  14  -5    1.90    0.81
   6 -14   5    0.26    0.69
  -6 -14  -5    0.17    0.58
  -6  14  -5   -0.25    0.69
  -8 -14  -5    2.92    0.78
  -8  14  -5    3.13    0.94
 -10 -14  -5    0.22    0.61
 -10  14  -5   -0.95    0.70
 -12 -14  -5    0.17    0.61
 -12  14  -5    0.34    0.87
 -15 -15   5    0.29    0.63
 -15  15   5    0.59    0.82
 -13 -15   5    0.51    0.61
  13 -15  -5   -0.32    0.63
 -13  15   5    1.02    0.83
  11 -15  -5    1.71    0.65
  11 -15  -5    1.84    0.82
 -11 -15   5    1.61    0.71
  11 -15  -5    0.74    0.75
 -11  15   5   -0.07    0.72
  -9 -15   5    0.32    0.63
   9 -15  -5    0.53    0.60
   9 -15  -5    0.70    0.60
  -9  15   5    0.72    0.73
  -7 -15   5    3.89    0.84
   7 -15  -5    3.92    0.92
   7  15  -5    3.62    0.82
  -7  15   5    4.53    0.97
   5 -15  -5    0.31    0.62
  -5 -15   5    0.01    0.58
  -5  15   5    0.27    0.61
  -5  15   5   -0.13    0.55
   5  15  -5    0.57    0.56
   3 -15  -5    7.73    1.06
  -3 -15   5    5.15    0.93
  -3  15   5    4.88    0.95
  -3  15   5    4.00    0.90
   3  15  -5    4.10    0.86
  -1 -15   5    0.45    0.64
   1 -15  -5    0.33    0.61
   1  15  -5    1.34    0.69
  -1  15   5   -1.16    0.47
   1  15  -5   -0.56    0.56
   1 -15   5    3.68    0.87
  -1 -15  -5    3.67    0.81
   1  15   5    3.75    0.83
  -1  15  -5    4.09    0.97
  -1  15  -5    3.34    0.85
  -3 -15  -5   -0.14    0.56
   3 -15   5    1.05    0.72
  -3  15  -5    0.24    0.70
   3  15   5    0.46    0.60
   5 -15   5    0.72    0.75
  -5 -15  -5    1.95    0.71
  -5  15  -5    4.61    1.04
  -7 -15  -5    0.19    0.64
  -7  15  -5   -0.81    0.69
  -9 -15  -5   -0.34    0.58
  -9  15  -5    0.35    0.84
 -14 -16   5   -0.54    0.57
 -14  16   5    0.82    0.88
 -12 -16   5    0.30    0.68
 -12  16   5    0.36    0.81
  10 -16  -5    0.05    0.70
 -10 -16   5    0.83    0.67
 -10  16   5    1.00    0.80
   8 -16  -5    0.78    0.74
  -8 -16   5    2.49    0.76
  -8  16   5    1.64    0.83
  -6 -16   5    2.18    0.78
   6 -16  -5    0.90    0.73
  -6  16   5    1.76    0.82
   6  16  -5    2.00    0.72
  -4 -16   5    0.91    0.69
   4 -16  -5    1.38    0.74
  -4  16   5    0.73    0.73
   4  16  -5    0.55    0.67
  -4  16   5    0.29    0.61
  -2 -16   5    0.45    0.71
   2 -16  -5    0.81    0.70
   2  16  -5    0.66    0.73
  -2  16   5    1.10    0.68
   0 -16   5    1.05    0.74
   0 -16  -5    1.74    0.79
   0  16  -5    1.34    0.75
   0  16  -5    1.67    0.78
   0  16   5    2.06    0.83
  -2 -16  -5   -0.57    0.58
   2 -16   5   -0.17    0.70
  -2  16  -5    0.98    0.81
  -4 -16  -5    2.28    0.80
   4 -16   5    0.97    0.76
  -4  16  -5    0.67    0.75
  -6 -16  -5    0.09    0.63
   6 -16   5    0.92    0.81
  -6  16  -5   -0.31    0.73
  -8 -16  -5    0.24    0.69
  -8  16  -5   -1.01    0.79
 -11 -17   5    0.10    0.64
 -11  17   5    2.14    0.92
   9 -17  -5   -0.23    0.70
  -9 -17   5   -0.13    0.67
  -9  17   5    0.36    0.81
  -7 -17   5    1.18    0.74
   7 -17  -5    1.44    0.80
  -7  17   5    1.68    0.87
   5 -17  -5    0.60    0.75
  -5 -17   5    0.47    0.71
  -3 -17   5    1.03    0.73
   3 -17  -5    2.11    0.84
  -3  17   5    0.13    0.74
   3  17  -5    1.33    0.75
   1 -17  -5    0.70    0.69
  -1 -17   5   -0.16    0.70
   1  17  -5    0.88    0.78
  -1  17   5    1.01    0.72
   1 -17   5    0.62    0.82
  -1 -17  -5    1.53    0.77
   3 -17   5    0.80    0.82
  -3 -17  -5    0.21    0.68
  -3  17  -5    1.41    0.86
   5 -17   5   -1.50    0.68
  -5 -17  -5    1.39    0.74
  -5  17  -5    0.16    0.82
  -7 -17  -5    1.85    0.80
  -7  17  -5    0.87    0.97
 -10 -18   5   -0.08    0.71
 -10  18   5   -0.21    0.78
  -8 -18   5    0.79    0.74
   8 -18  -5    0.93    0.82
  -8  18   5    1.55    0.90
  -6 -18   5    1.40    0.77
   6 -18  -5    0.75    0.84
  -4 -18   5    1.22    0.82
   4 -18  -5    1.96    0.85
   2 -18  -5   -0.05    0.68
  -2 -18   5    0.35    0.76
   0 -18   5   -1.18    0.66
   0 -18  -5    0.02    0.74
  -2 -18  -5    0.51    0.77
   2 -18   5    1.02    0.89
  -4 -18  -5   -1.79    0.55
   4 -18   5   -0.23    0.79
  -4  18  -5   -1.07    0.80
   5 -19  -5    0.59    0.82
  -3 -19   5    0.77    0.80
   3 -19  -5    1.07    0.83
   1 -19  -5   -1.05    0.67
 -24   0   6    0.42    0.50
 -22   0   6    1.47    0.58
 -22   0   6    0.46    0.44
  20   0  -6    4.61    0.43
 -20   0   6    4.70    0.72
 -20   0   6    5.60    0.67
 -18   0   6   -0.31    0.40
  18   0  -6   -0.36    0.27
 -18   0   6    0.12    0.38
 -16   0   6   19.43    1.02
 -16   0   6   20.96    1.06
 -16   0   6   20.78    1.18
  16   0  -6   20.42    1.02
  14   0  -6    4.54    0.49
  14   0  -6    3.44    0.45
 -14   0   6    3.04    0.54
 -14   0   6    3.89    0.48
 -14   0   6    3.48    0.49
 -14   0   6    3.24    0.45
  14   0  -6    4.43    0.40
 -12   0   6    2.39    0.38
 -12   0   6    2.34    0.40
 -12   0   6    2.78    0.41
  12   0  -6    2.45    0.33
  12   0  -6    2.33    0.38
 -12   0   6    2.44    0.46
  12   0  -6    2.69    0.40
  10   0  -6    0.83    0.29
 -10   0   6    1.00    0.32
 -10   0   6    1.07    0.37
 -10   0   6    1.33    0.31
 -10   0   6    1.51    0.32
  10   0  -6    1.74    0.34
 -10   0   6    1.20    0.30
  10   0  -6    1.70    0.31
  -8   0   6   66.19    2.41
   8   0  -6   65.45    2.49
  -8   0   6   73.13    2.52
   8   0  -6   68.16    2.37
  -8   0   6   69.39    2.46
  -8   0   6   67.05    2.51
   6   0  -6    7.77    0.58
  -6   0   6    7.61    0.57
  -6   0   6    6.72    0.58
   6   0  -6    8.06    0.58
  -6   0   6    6.47    0.59
  -6   0   6    6.64    0.63
   6   0  -6    7.75    0.55
  -4   0   6   22.45    1.02
   4   0  -6   22.83    1.05
  -4   0   6   20.66    1.05
   4   0  -6   21.98    1.07
  -4   0   6   20.82    1.05
  -4   0   6   22.76    1.06
  -2   0   6    5.66    0.57
  -2   0   6    6.40    0.55
  -2   0   6    5.31    0.55
   2   0  -6    6.97    0.60
  -2   0   6    5.38    0.56
   2   0  -6    6.87    0.59
   0   0   6   97.95    3.30
   0   0   6   92.81    3.12
   0   0  -6   91.55    3.16
   0   0   6   92.03    3.13
   0   0  -6   90.97    3.27
   0   0   6   87.48    3.28
   2   0   6    4.82    0.55
   2   0   6    4.47    0.52
   2   0   6    4.78    0.53
  -2   0  -6    4.57    0.54
   2   0   6    5.42    0.53
  -2   0  -6    4.61    0.52
   2   0   6    4.94    0.64
   4   0   6   10.39    0.77
  -4   0  -6   10.33    0.76
  -4   0  -6   10.93    0.78
   4   0   6   12.69    0.75
   4   0   6   13.88    1.00
   6   0   6    3.21    0.49
   6   0   6    3.54    0.64
   6   0   6    1.79    0.42
   6   0   6    3.49    0.45
  -6   0  -6    3.36    0.52
  -6   0  -6    2.74    0.44
   8   0   6   12.75    1.21
  -8   0  -6   13.67    0.97
  -8   0  -6   13.45    0.89
   8   0   6   14.90    0.93
   8   0   6   12.93    0.89
  10   0   6   20.83    1.16
  10   0   6   19.15    1.14
 -10   0  -6   19.52    1.19
  12   0   6   -0.11    0.34
 -12   0  -6    0.04    0.43
 -14   0  -6    1.82    0.58
 -16   0  -6    0.74    0.59
 -18   0  -6    0.30    0.57
 -23  -1   6   -0.18    0.40
 -23   1   6   -0.09    0.46
 -21  -1   6    1.66    0.55
  21  -1  -6    2.12    0.36
 -21  -1   6    2.28    0.50
 -21   1   6    1.29    0.52
 -21   1   6    1.91    0.62
  19  -1  -6    0.71    0.35
 -19  -1   6    1.24    0.48
 -19  -1   6    1.28    0.41
 -19   1   6    1.22    0.47
 -19   1   6    1.37    0.56
  19   1  -6    1.01    0.27
 -17  -1   6    4.72    0.54
 -17  -1   6    4.24    0.46
 -17  -1   6    4.85    0.65
  17  -1  -6    4.27    0.53
  17  -1  -6    4.09    0.51
 -17   1   6    4.17    0.70
 -17   1   6    3.40    0.54
  17   1  -6    3.45    0.44
 -15  -1   6    8.43    0.61
 -15  -1   6    6.85    0.73
  15  -1  -6    8.61    0.71
 -15  -1   6   10.43    0.71
  15  -1  -6    7.70    0.48
  15  -1  -6    9.74    0.70
 -15   1   6    8.43    0.70
 -15   1   6   10.73    0.93
 -15   1   6    9.28    0.76
  15   1  -6    7.90    0.61
  15   1  -6    8.91    0.56
  13  -1  -6    1.29    0.29
 -13  -1   6    0.68    0.28
 -13  -1   6    0.59    0.37
 -13  -1   6    0.90    0.29
[truncated: 360,734 more chars]
